# Supplementary material for: Zirconium oxide nano-catalyzed synthesis of pharmacologically important bis(indolyl)methanes: a highly efficient and mild approach
Source: Royal Society of Chemistry journal article supplement (doi:10.1039/d4ob00324a), 2024-01-01
Supplement: d4ob00324a1.pdf [file d4ob00324a1.pdf]

# **Zirconium Oxide Nano-Catalyzed Synthesis of Pharmacologically Important Bis(indolyl)methanes: A Highly Efficient and Mild Approach**

Komal Rathi,<sup>1</sup> Om Shanker Tiwari,\*<sup>2</sup> Varun Rawat,\*<sup>3</sup> Jawahar L. Jat,<sup>5</sup> Dinesh Kumar Yadav,<sup>6</sup> Ved Prakash Verma\*<sup>1,4</sup>

<sup>1</sup> *Department of Chemistry, Banasthali University, Banasthali Newai-304022, India*

<sup>2</sup> *The Shmunis School of Biomedicine and Cancer Research, Tel Aviv University, Tel Aviv-6997801, Israel*

<sup>3</sup> *Faculty of Exact Sciences, Tel Aviv University, Tel Aviv-6997801, Israel*

<sup>4</sup> *Department of Education in Science and Mathematics (DESM), Regional Institute of Education, Bhubaneswar.*

<sup>5</sup> *Department of Chemistry, Babasaheb Bhimrao Ambedkar University (A Central University) Vidya Vihar, Raebareli Road, Lucknow-226025, Uttar Pradesh, India*

<sup>6</sup> *Department of Chemistry, Mohanlal Sukhadia University, Udaipur, 313001, India*

\*Corresponding author: email: [otiwari1992@gmail.com](mailto:otiwari1992@gmail.com), [varunrawat.chemistry@gmail.com](mailto:varunrawat.chemistry@gmail.com), email: [vedprakash079@gmail.com](mailto:vedprakash079@gmail.com)

## Supporting Information

|                                                                                               |                           |
|-----------------------------------------------------------------------------------------------|---------------------------|
| $^1\text{H}$ and $^{13}\text{C}$ NMR and HRMS spectra of compound <b>3a</b>                   | <b>S4, S5, S6</b>         |
| $^1\text{H}$ and $^{13}\text{C}$ NMR and HRMS spectra of compound <b>3b</b>                   | <b>S7, S8, S9</b>         |
| $^1\text{H}$ and $^{13}\text{C}$ NMR and HRMS spectra of compound <b>3c</b>                   | <b>S10, S11, S12</b>      |
| $^1\text{H}$ and $^{13}\text{C}$ NMR and HRMS spectra of compound <b>3d</b>                   | <b>S13, S14, S15</b>      |
| $^1\text{H}$ and $^{13}\text{C}$ NMR and HRMS spectra of compound <b>3e</b>                   | <b>S16, S17, S18</b>      |
| $^1\text{H}$ and $^{13}\text{C}$ NMR and HRMS spectra of compound <b>3f</b>                   | <b>S19, S20, S21</b>      |
| $^1\text{H}$ and $^{13}\text{C}$ NMR and HRMS spectra of compound <b>3g</b>                   | <b>S22, S23, S24</b>      |
| $^1\text{H}$ and $^{13}\text{C}$ NMR and HRMS spectra of compound <b>3h</b>                   | <b>S25, S26, S27</b>      |
| $^1\text{H}$ and $^{13}\text{C}$ NMR and HRMS spectra of compound <b>3i</b>                   | <b>S28, S29, S30</b>      |
| $^1\text{H}$ , and $^{13}\text{C}$ NMR and HRMS spectra of compound <b>3j</b>                 | <b>S31, S32, S33</b>      |
| $^1\text{H}$ , and $^{13}\text{C}$ NMR and HRMS spectra of compound <b>3k</b>                 | <b>S34, S35, S36</b>      |
| $^1\text{H}$ , $^{13}\text{C}$ and $^{19}\text{F}$ NMR and HRMS spectra of compound <b>3l</b> | <b>S37, S38, S39, S40</b> |
| $^1\text{H}$ and $^{13}\text{C}$ NMR spectra of compound <b>3m</b>                            | <b>S41, S42</b>           |
| $^1\text{H}$ and $^{13}\text{C}$ NMR spectra of compound <b>3n</b>                            | <b>S43, S44</b>           |

|                                                                               |                      |
|-------------------------------------------------------------------------------|----------------------|
| $^1\text{H}$ and $^{13}\text{C}$ NMR spectra of compound <b>3o</b>            | <b>S45, S46</b>      |
| $^1\text{H}$ and $^{13}\text{C}$ NMR and HRMS spectra of compound <b>3p</b>   | <b>S47, S48, S49</b> |
| $^1\text{H}$ and $^{13}\text{C}$ NMR spectra of compound <b>3q</b>            | <b>S50, S51</b>      |
| $^1\text{H}$ , and $^{13}\text{C}$ NMR and HRMS spectra of compound <b>3r</b> | <b>S52, S53, S54</b> |
| $^1\text{H}$ , and $^{13}\text{C}$ NMR and HRMS spectra of compound <b>3s</b> | <b>S55, S56, S57</b> |
| $^1\text{H}$ , and $^{13}\text{C}$ NMR and HRMS spectra of compound <b>3t</b> | <b>S58, S59, S60</b> |
| $^1\text{H}$ , and $^{13}\text{C}$ NMR spectra of compound <b>3u</b>          | <b>S61, S62</b>      |
| $^1\text{H}$ , and $^{13}\text{C}$ NMR spectra of compound <b>3v</b>          | <b>S63, S64</b>      |
| $^1\text{H}$ , and $^{13}\text{C}$ NMR spectra of compound <b>3w</b>          | <b>S65, S66</b>      |
| $^1\text{H}$ , and $^{13}\text{C}$ NMR spectra of compound <b>3x</b>          | <b>S67, S68</b>      |
| $^1\text{H}$ , and $^{13}\text{C}$ NMR spectra of compound <b>3y</b>          | <b>S69, S70</b>      |
| $^1\text{H}$ , and $^{13}\text{C}$ NMR spectra of compound <b>3z</b>          | <b>S71, S72</b>      |

# SPECTRA

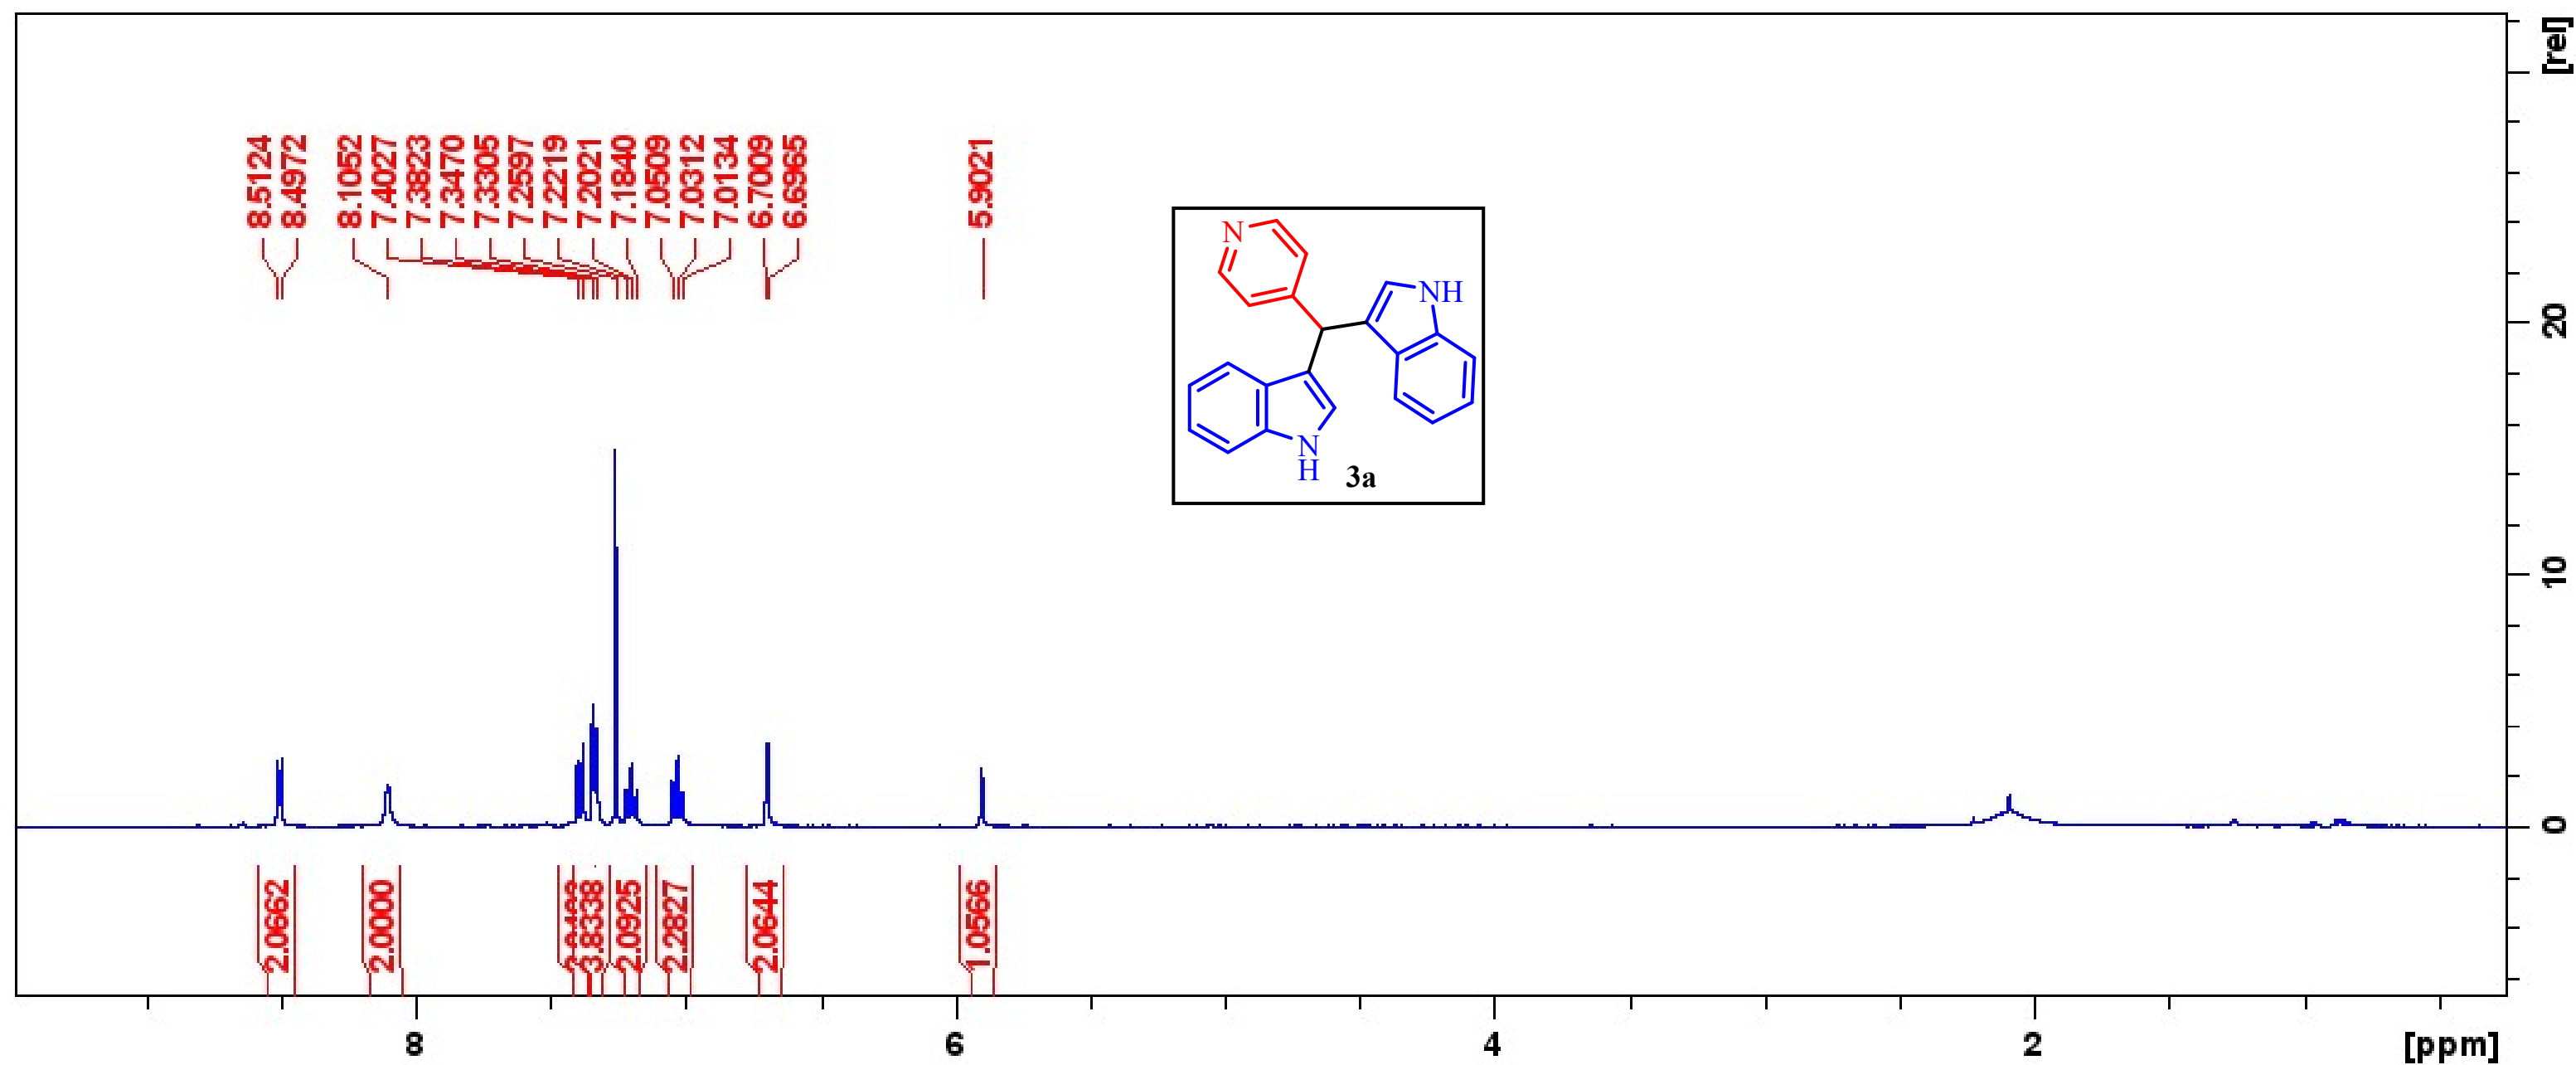

Figure 1. <sup>1</sup>H NMR spectrum of compound **3a**

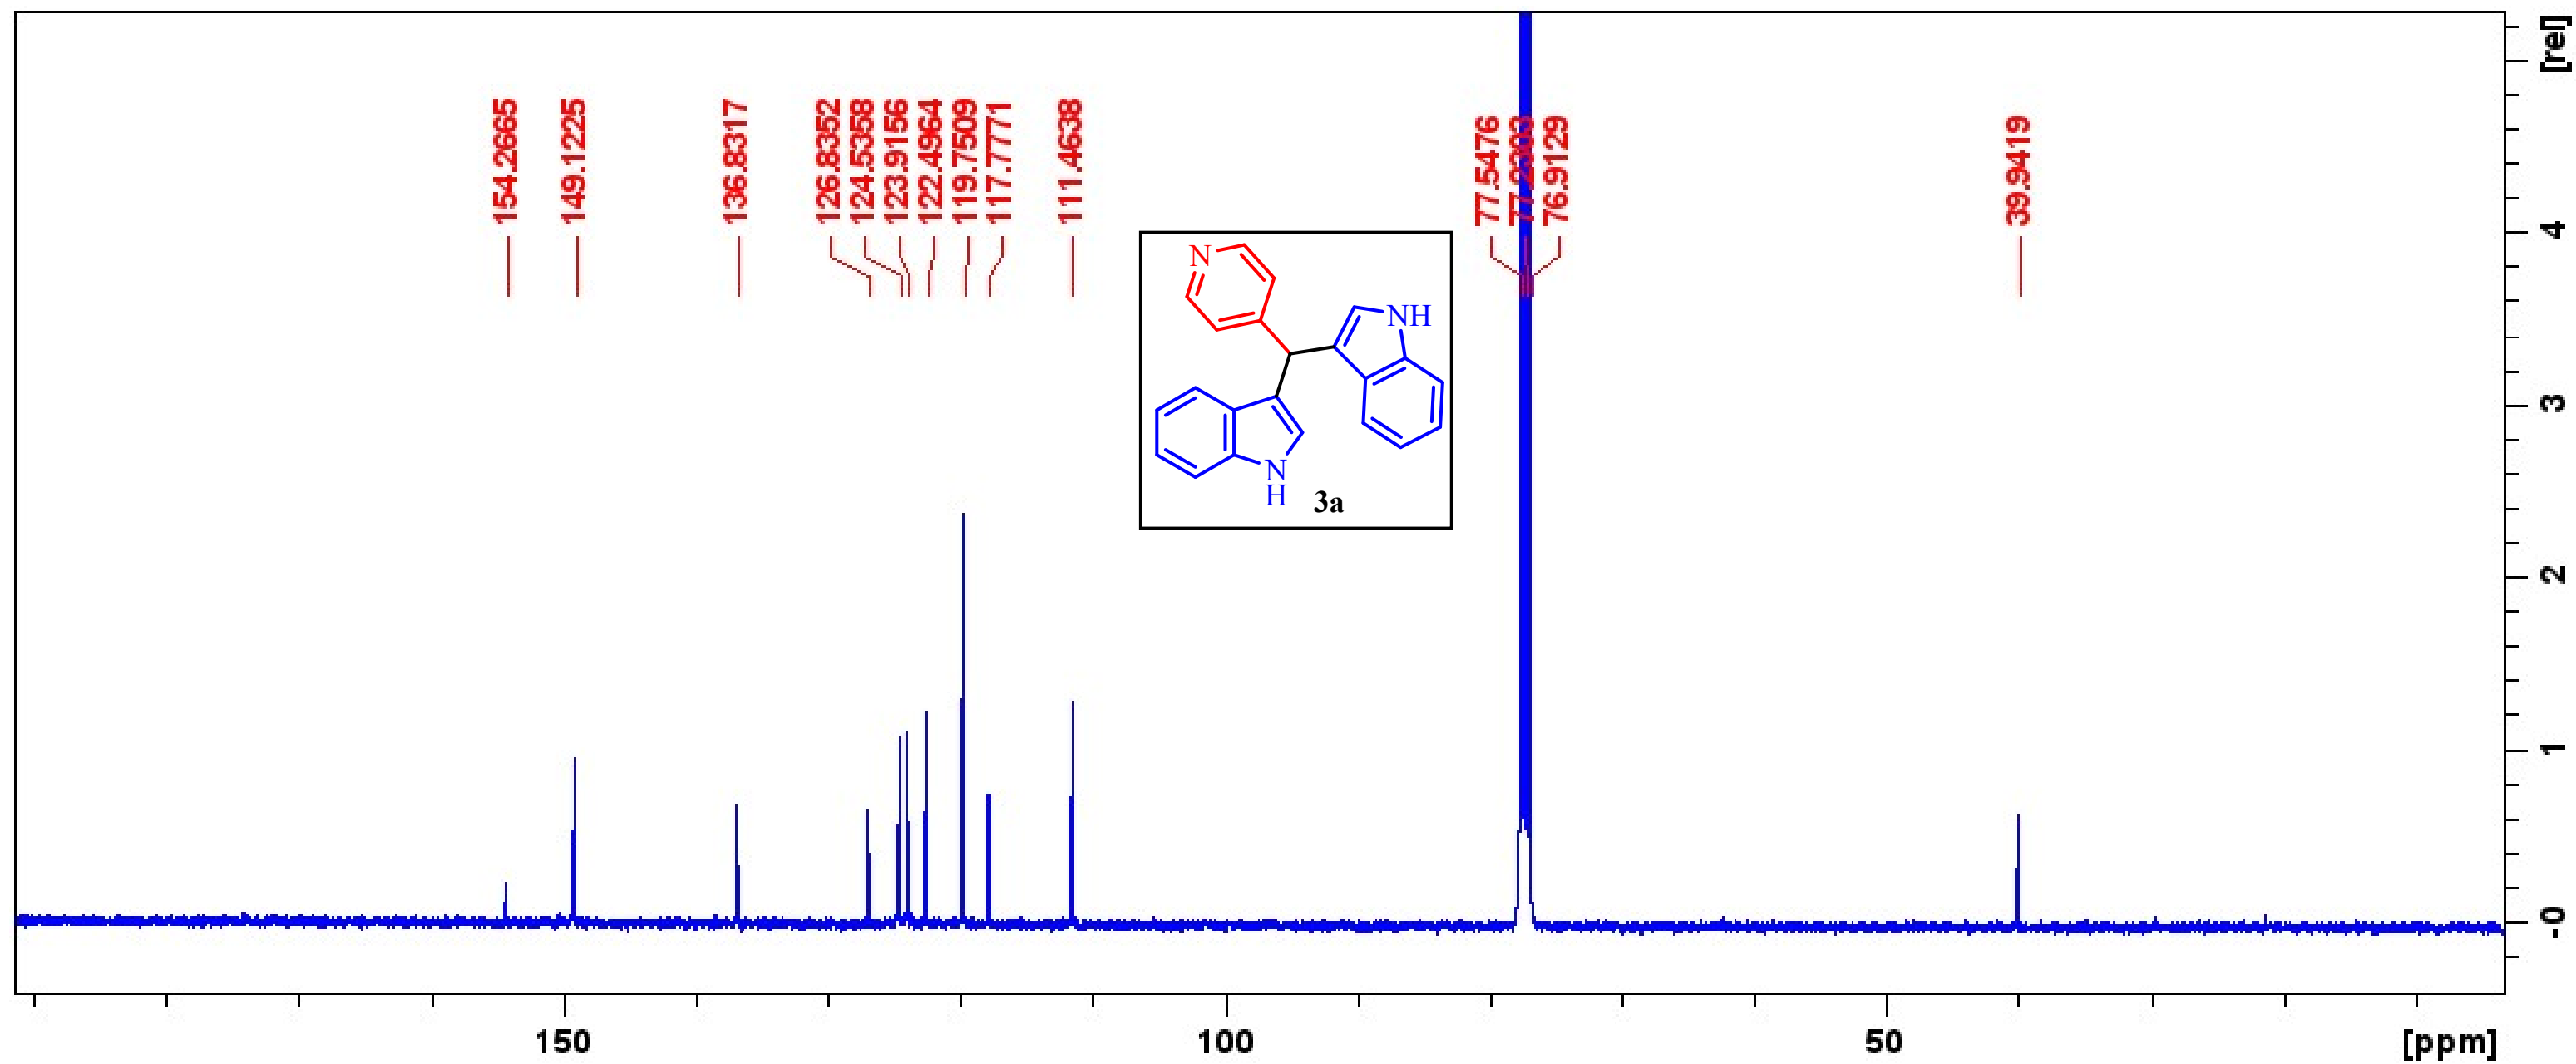

Figure 2. <sup>13</sup>C NMR spectrum of compound **3a**

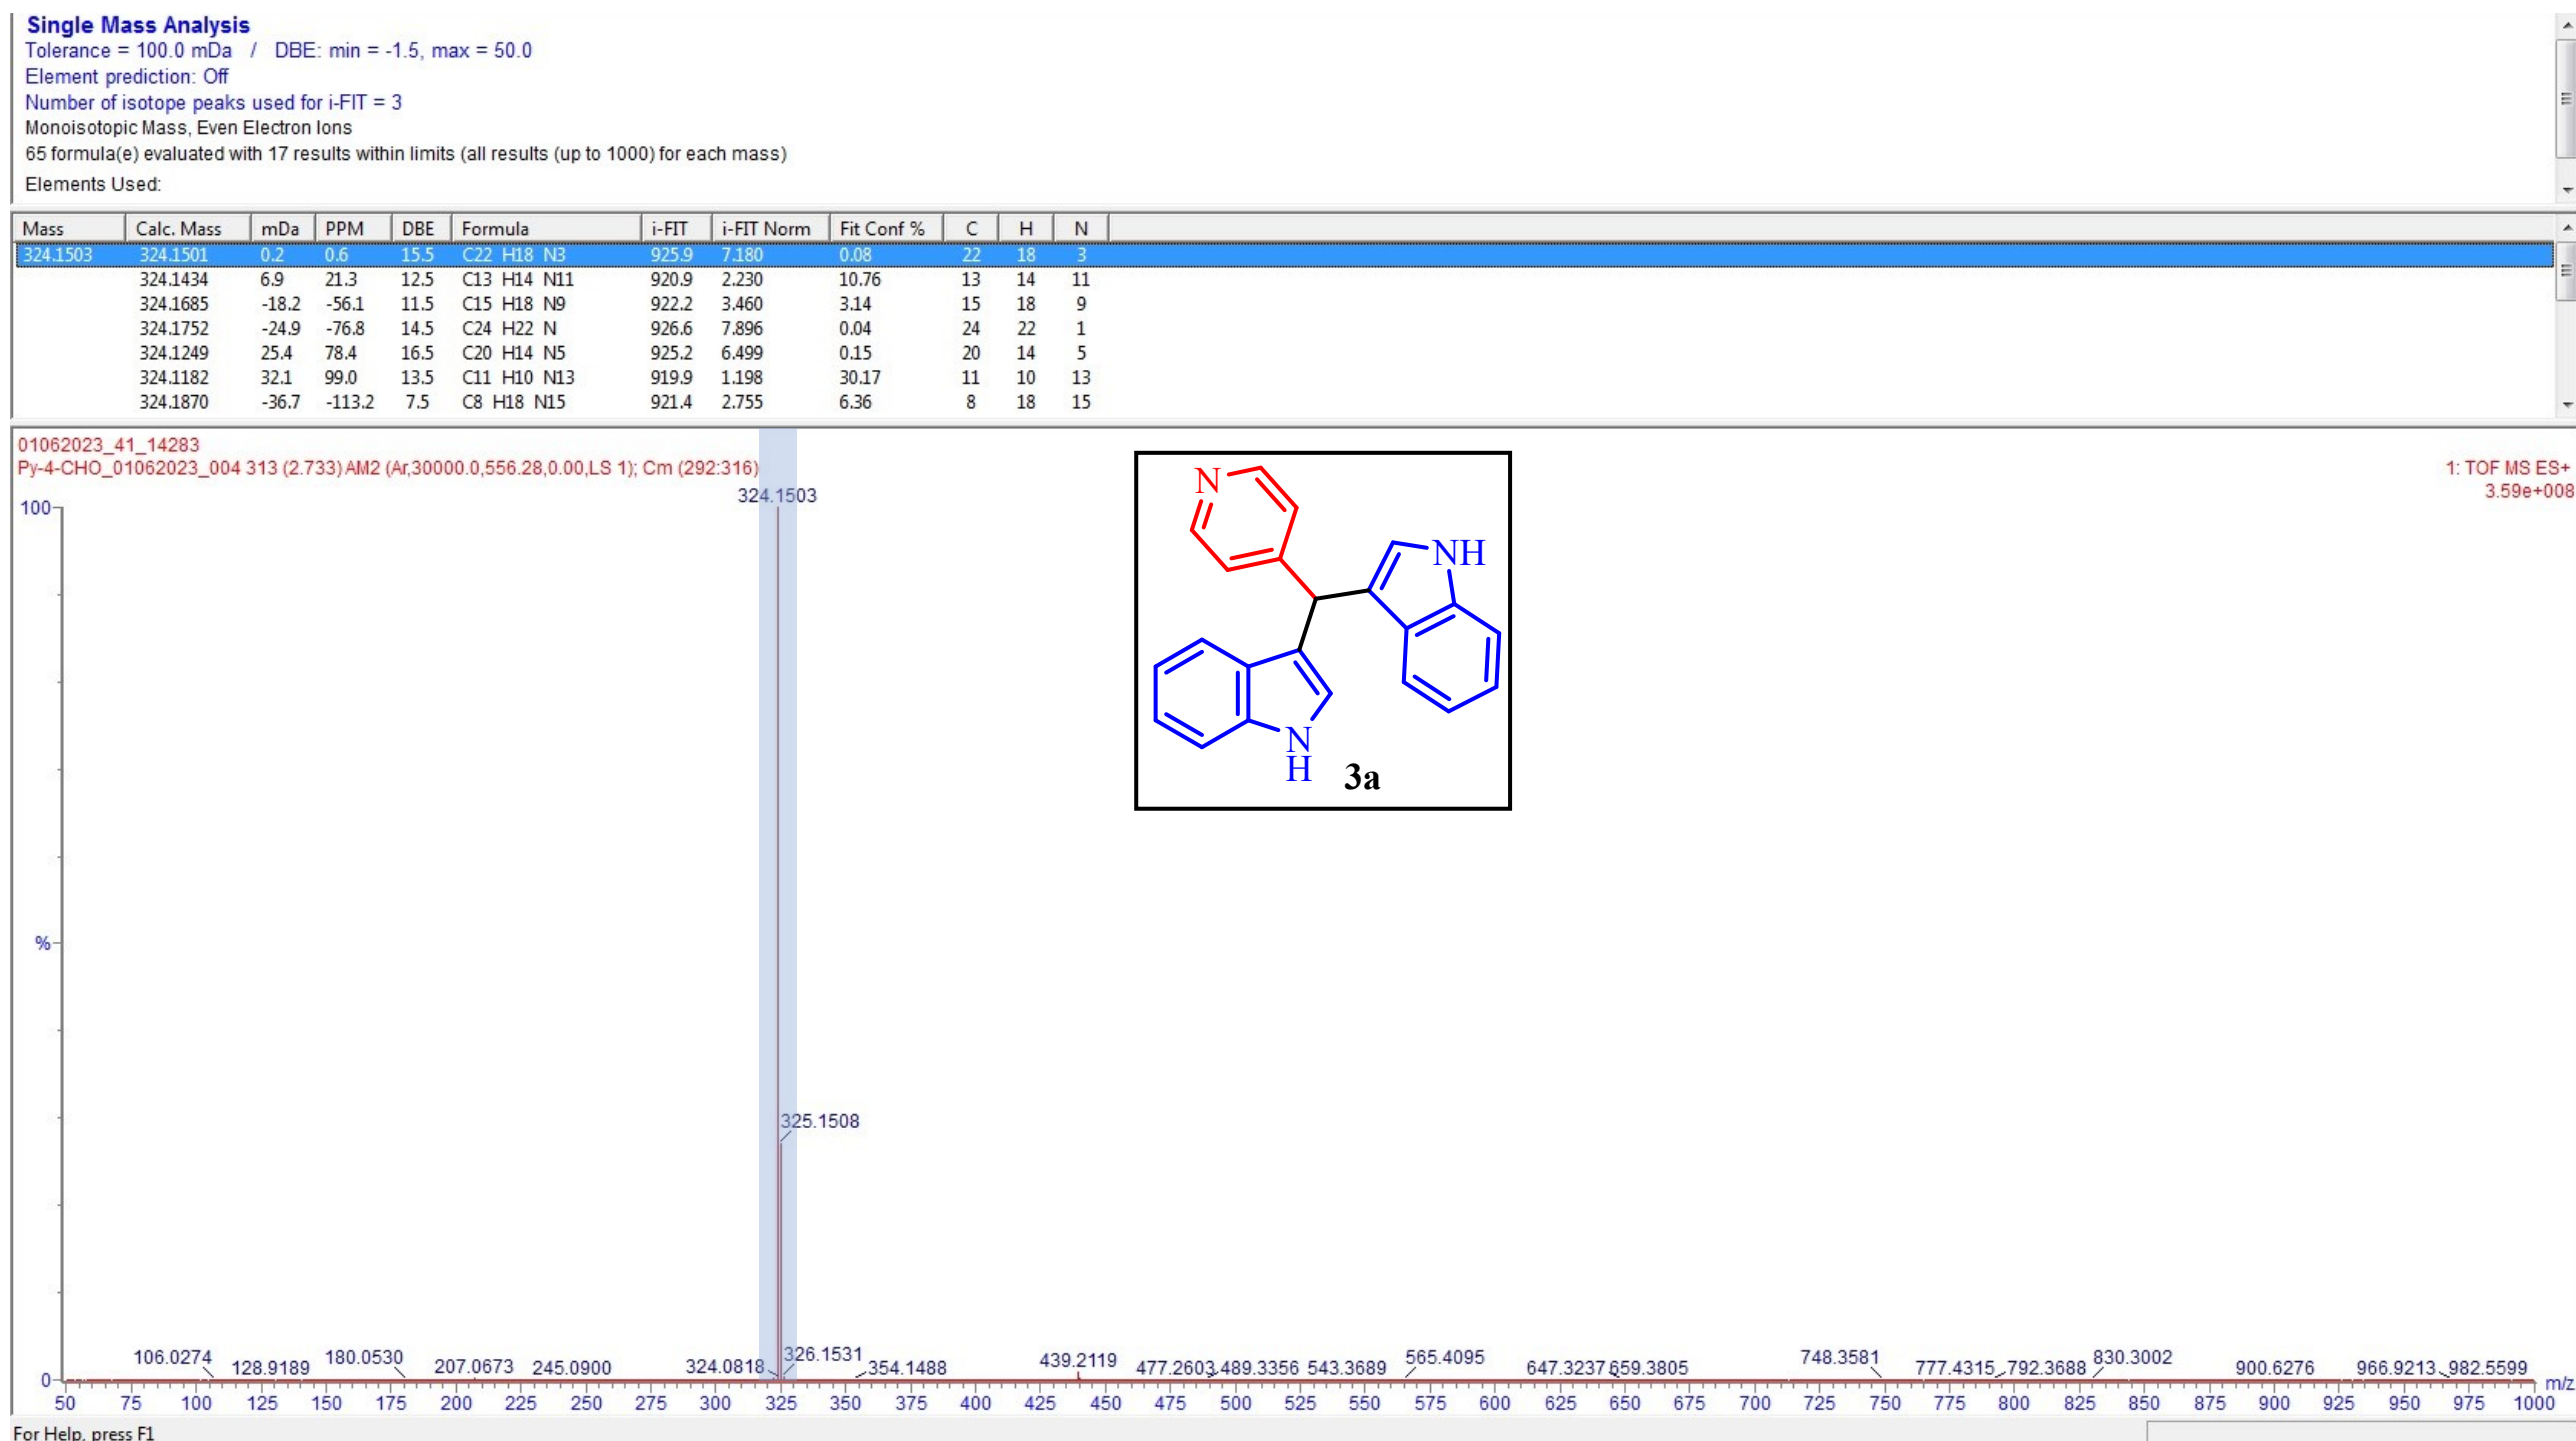

Figure 3. HRMS spectrum of compound **3a**

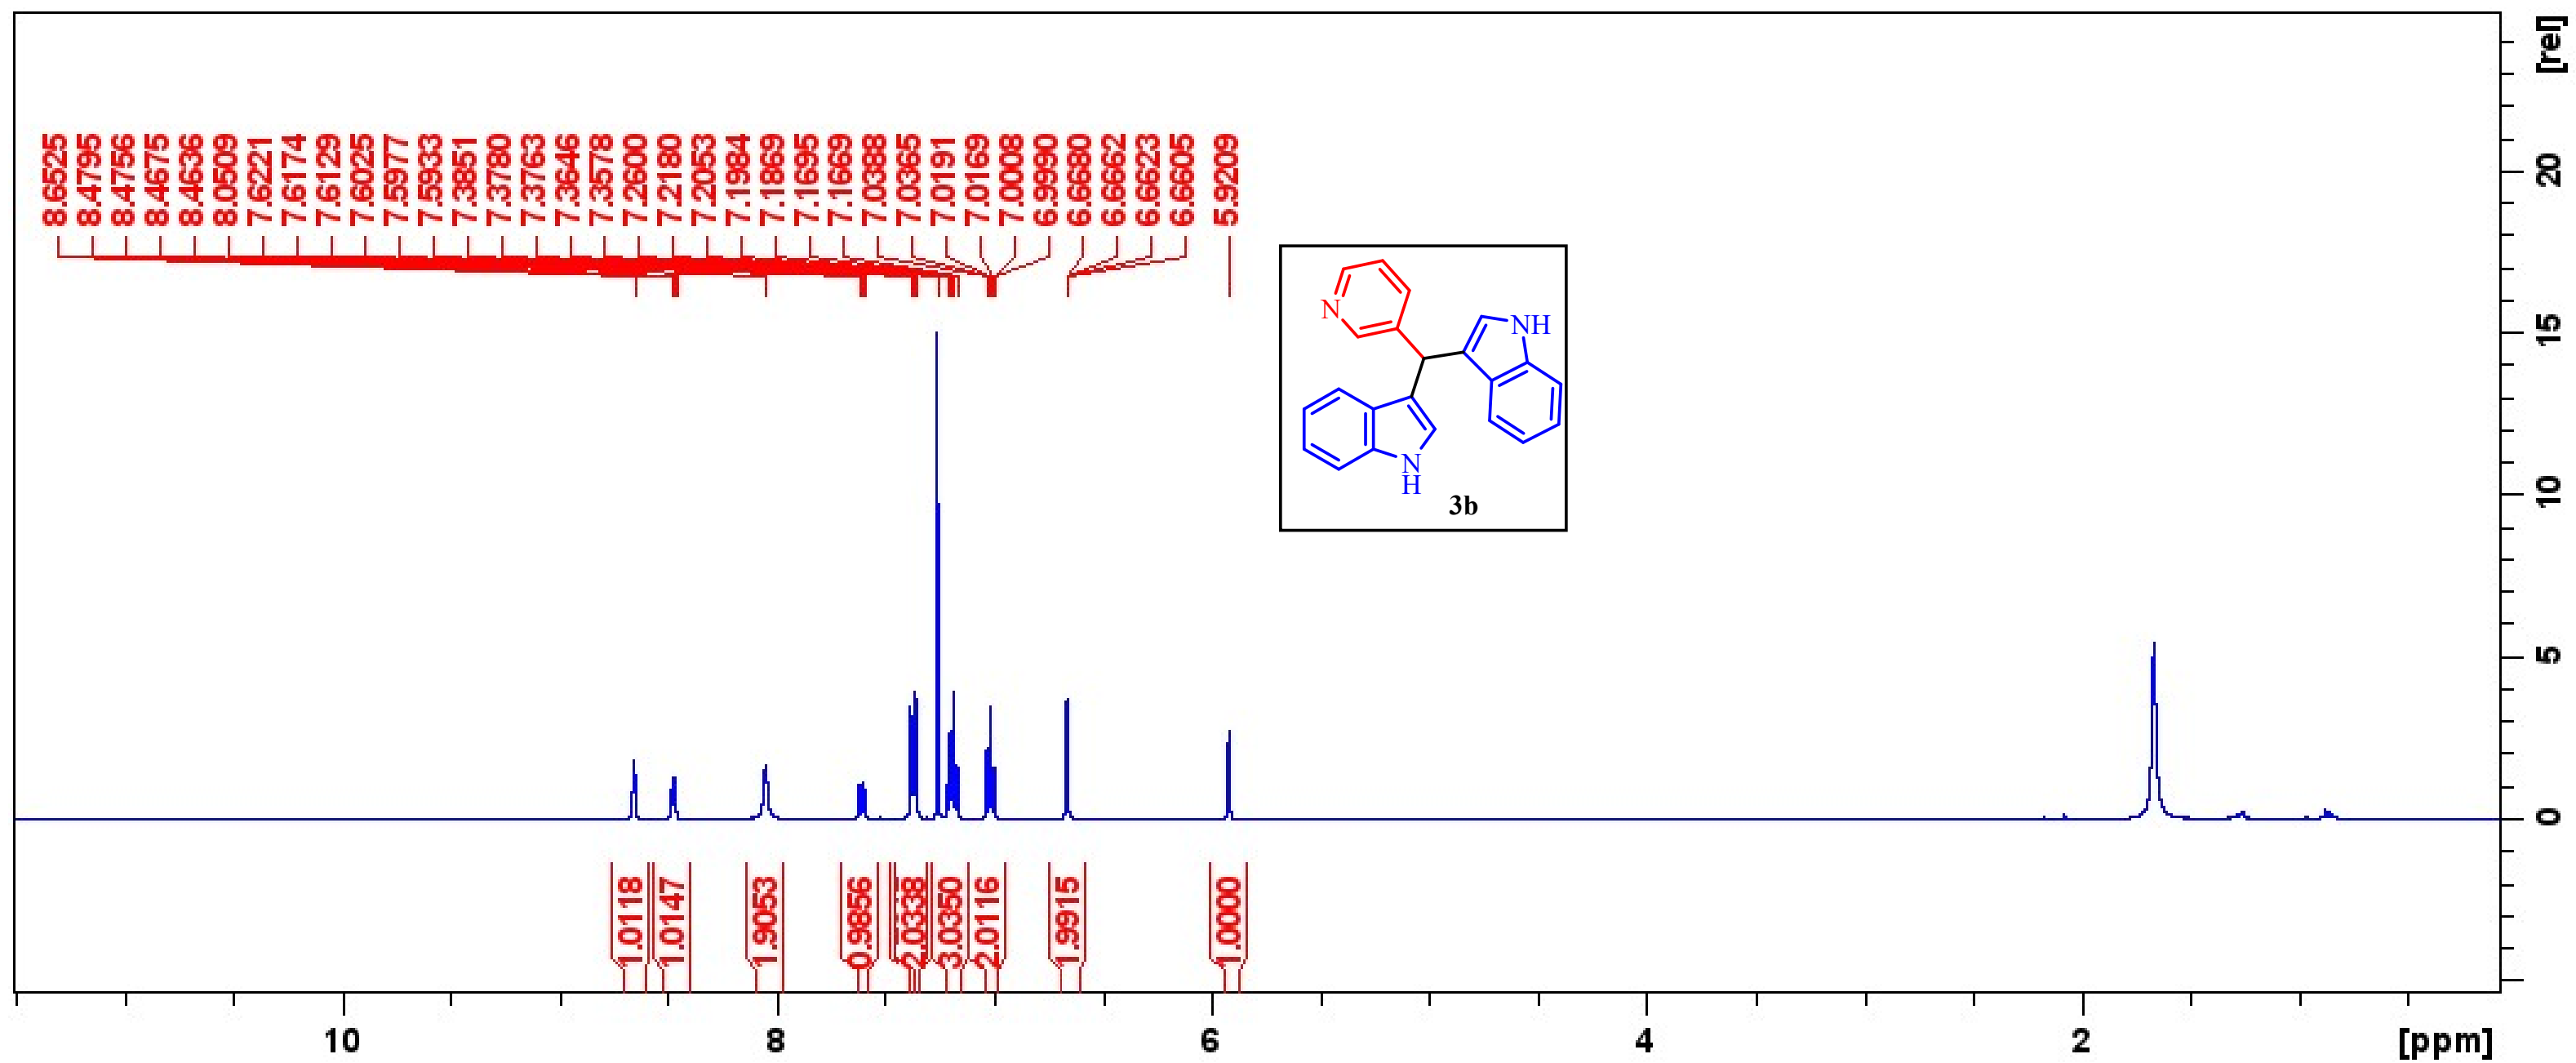

Figure 4.  $^1\text{H}$  NMR spectrum of compound **3b**

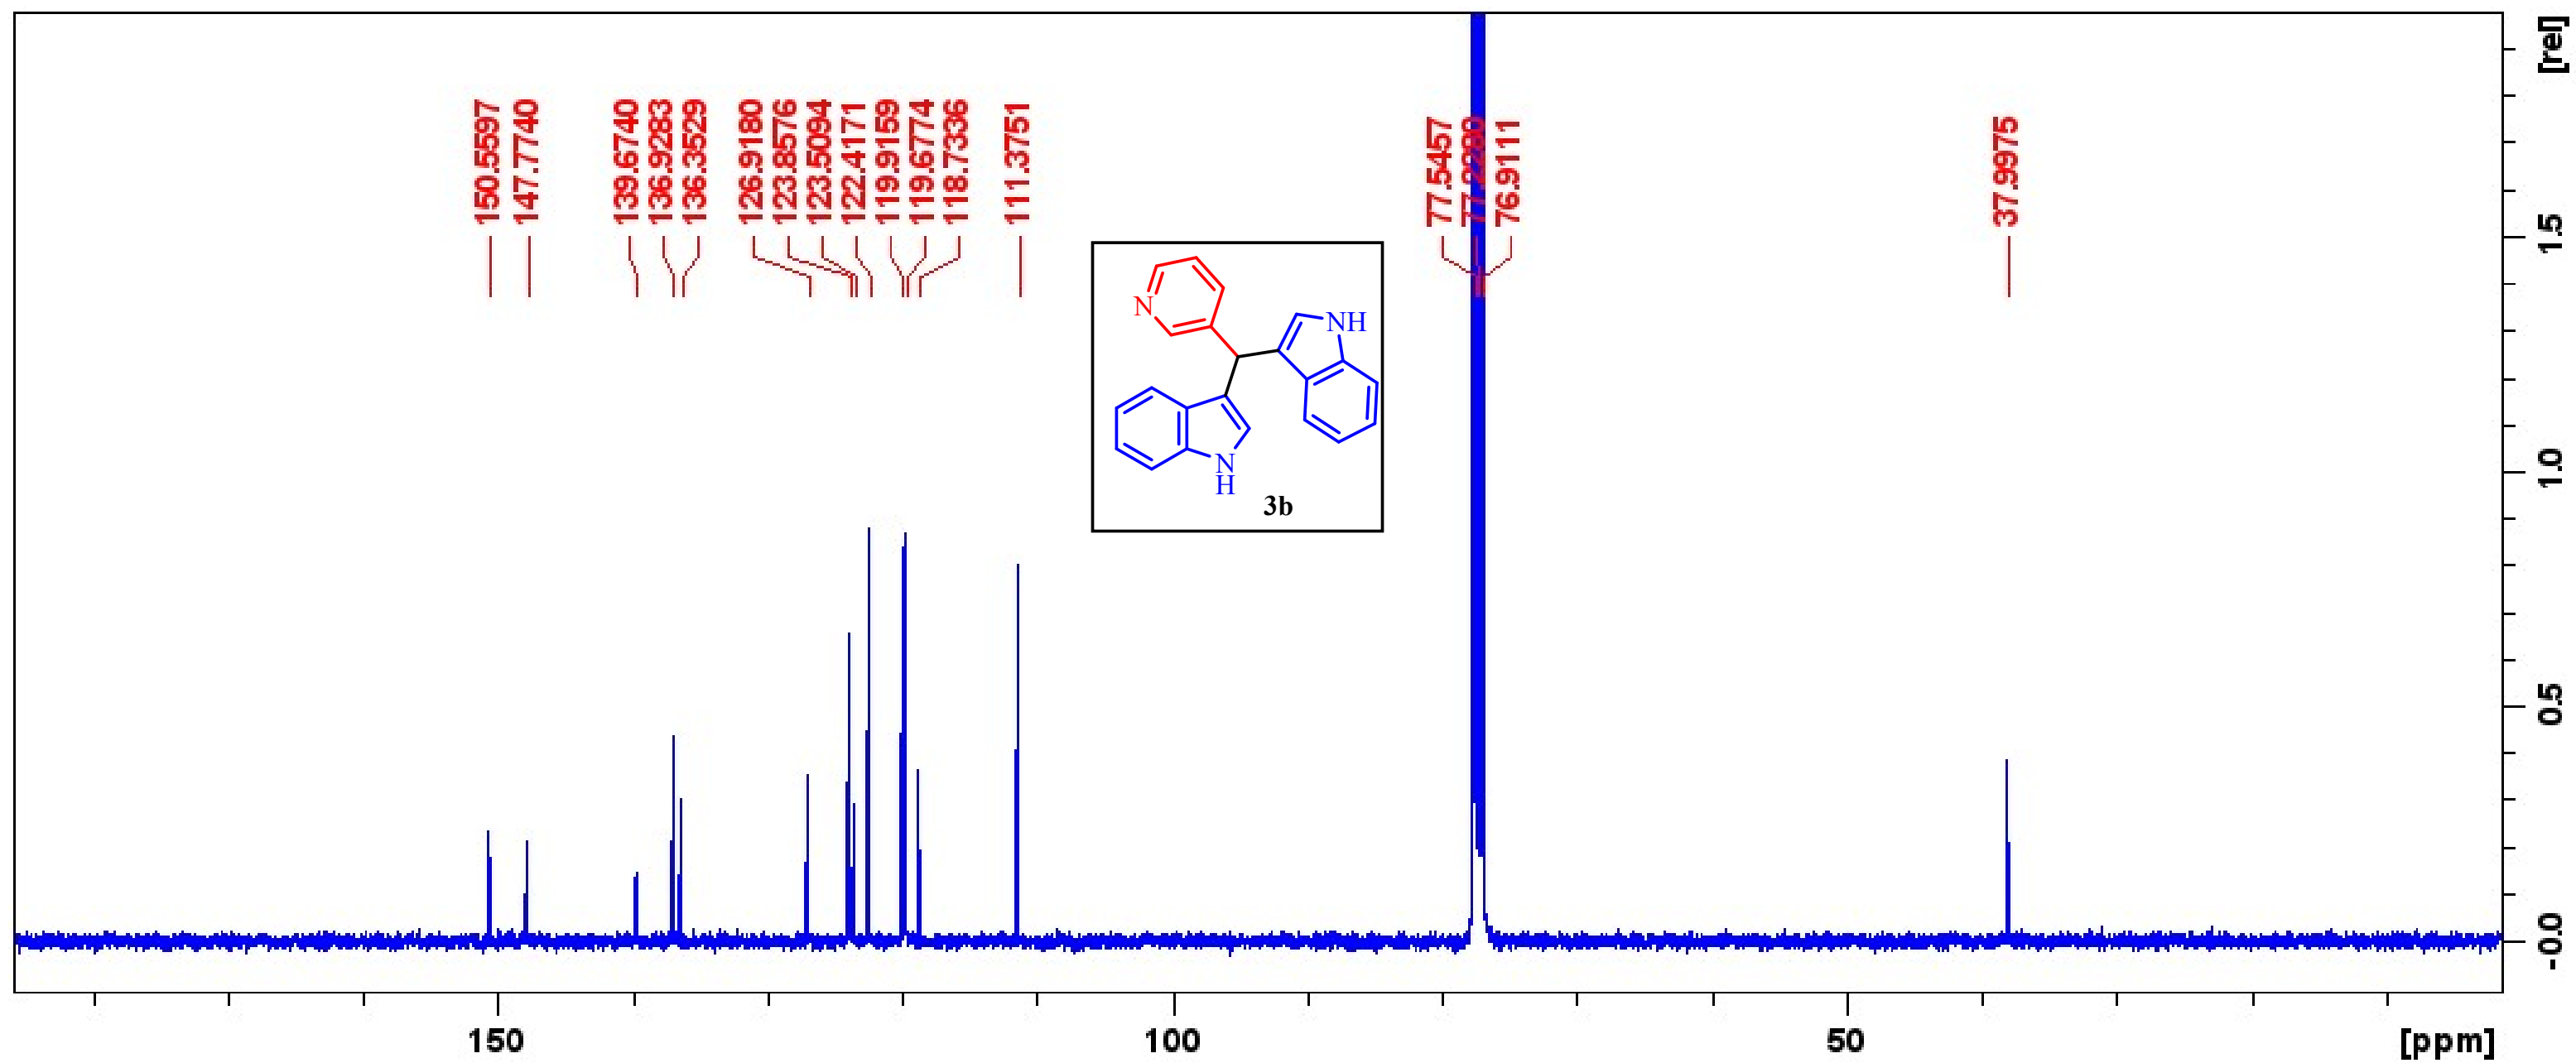

Figure 5. <sup>13</sup>C NMR spectrum of compound **3b**



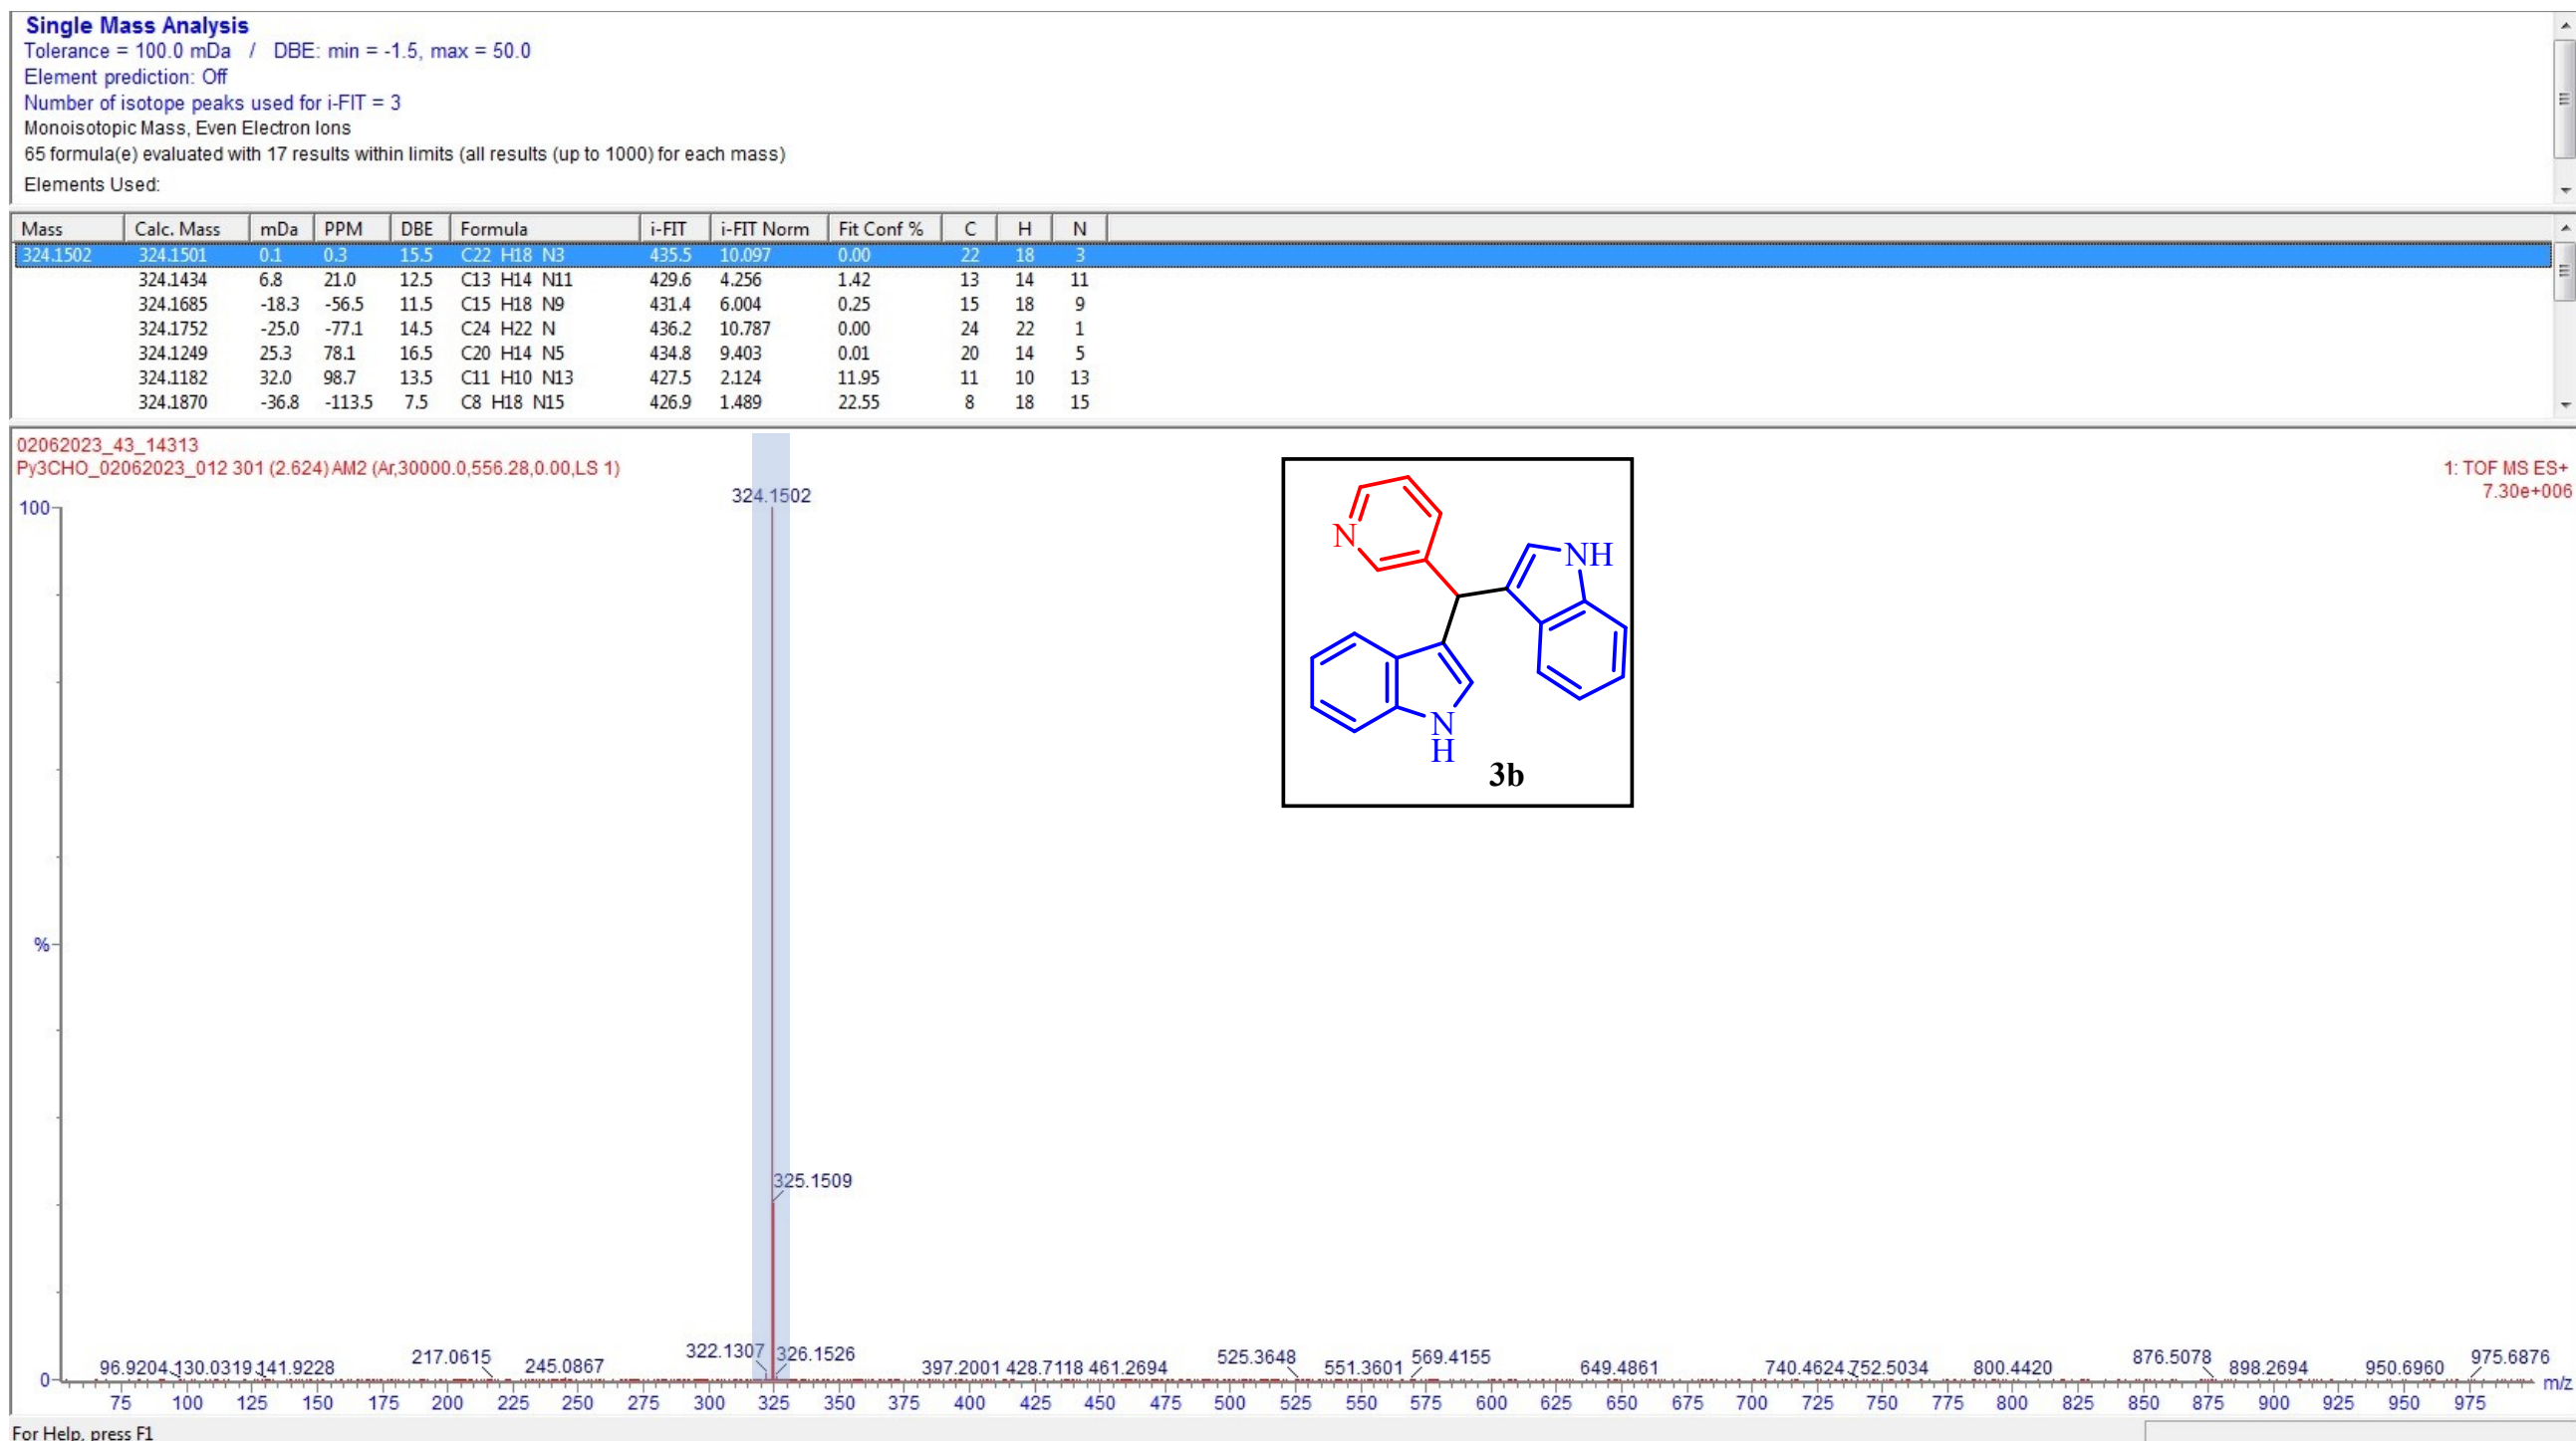

Figure 6. HRMS spectrum of compound **3b**

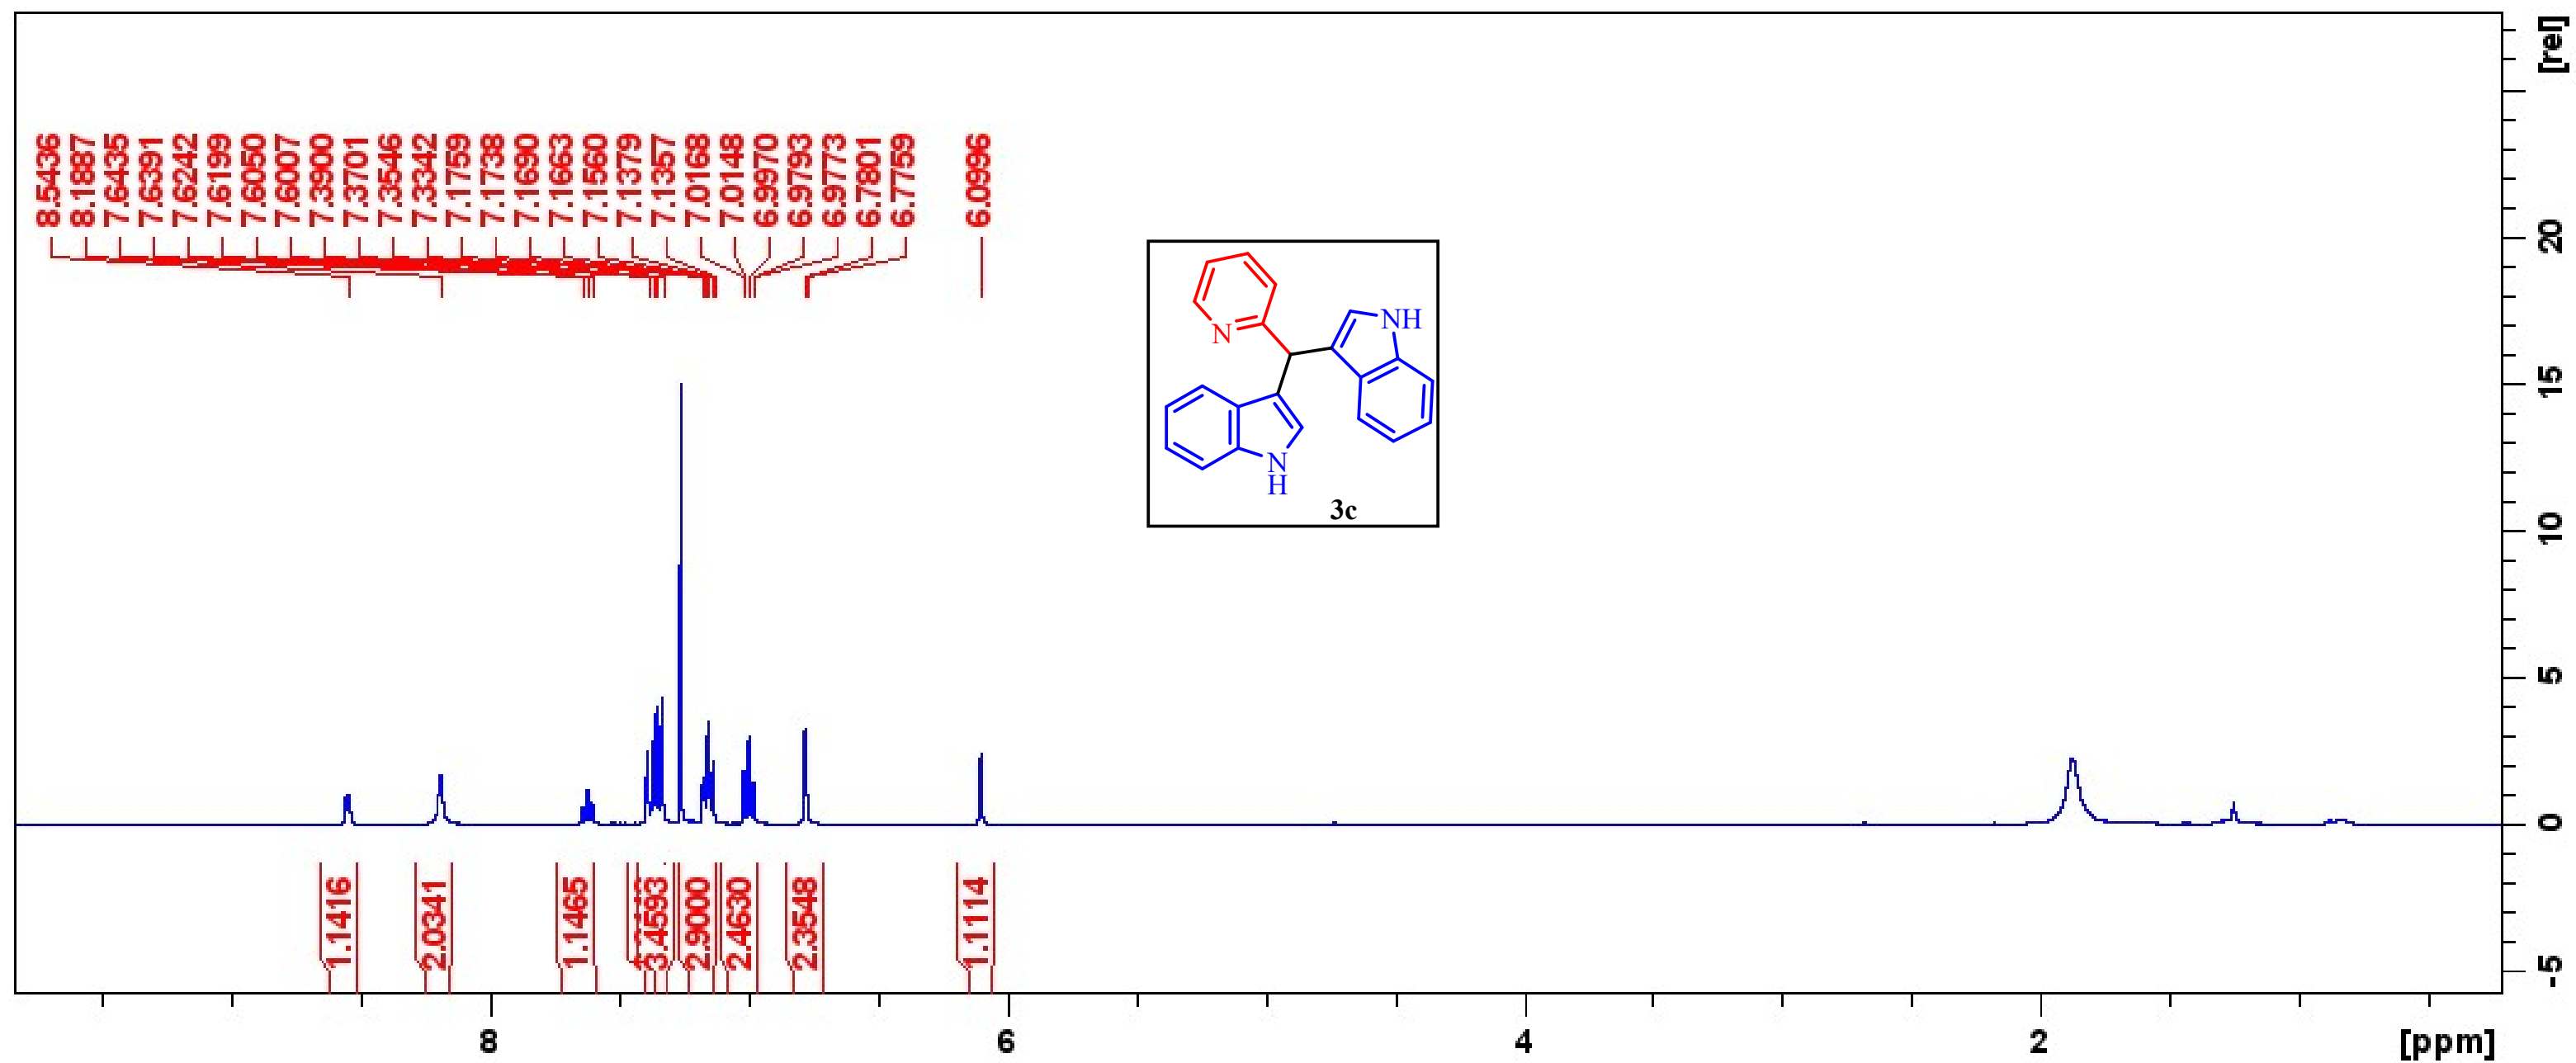

Figure 7. <sup>1</sup>H NMR spectrum of compound **3c**

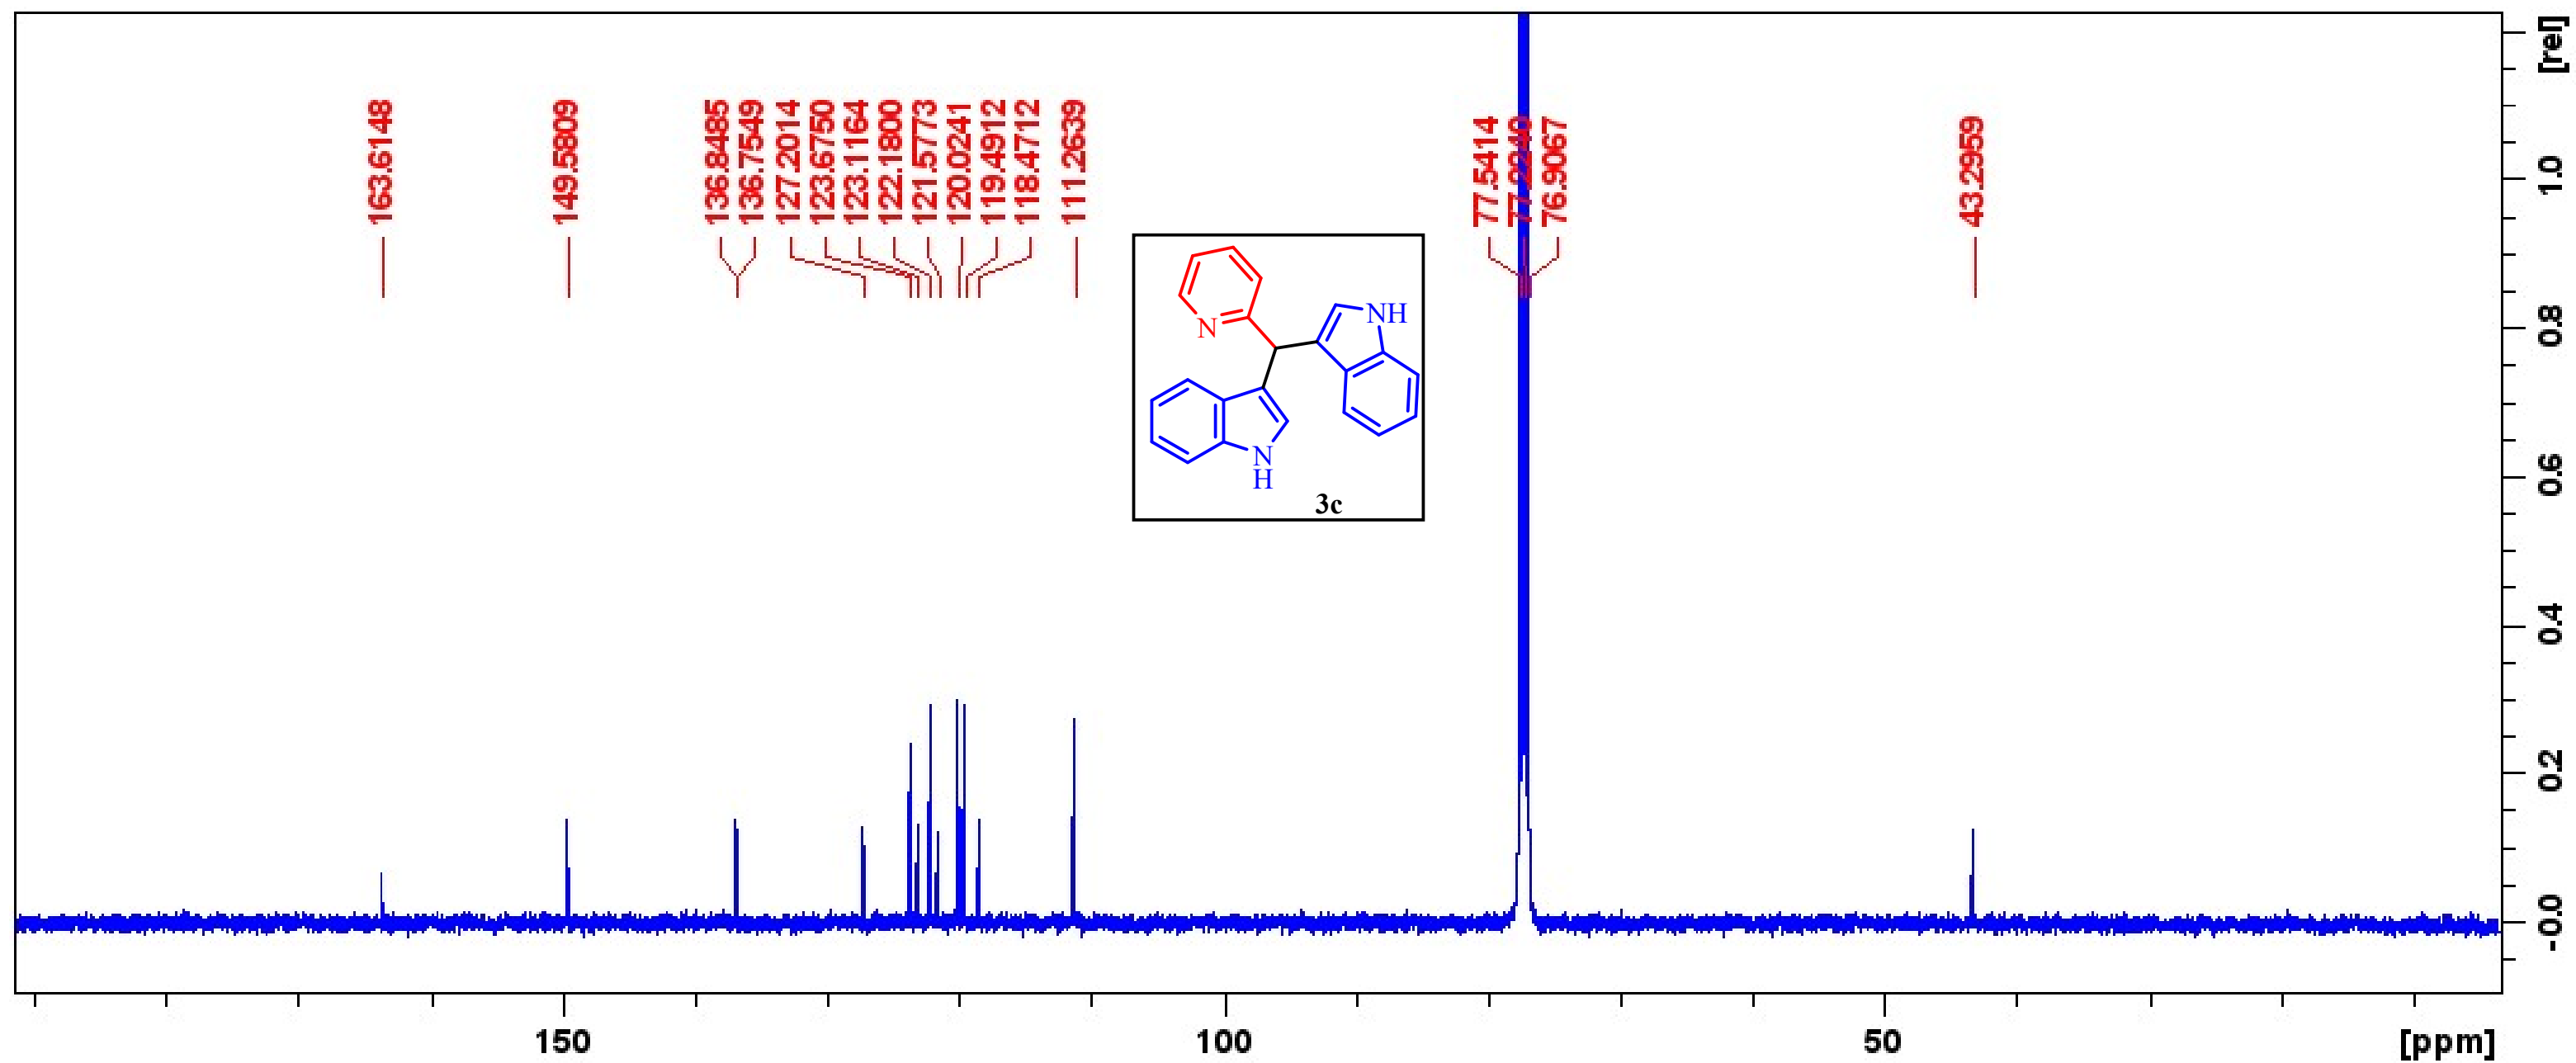

Figure 8. <sup>13</sup>C NMR spectrum of compound **3c**

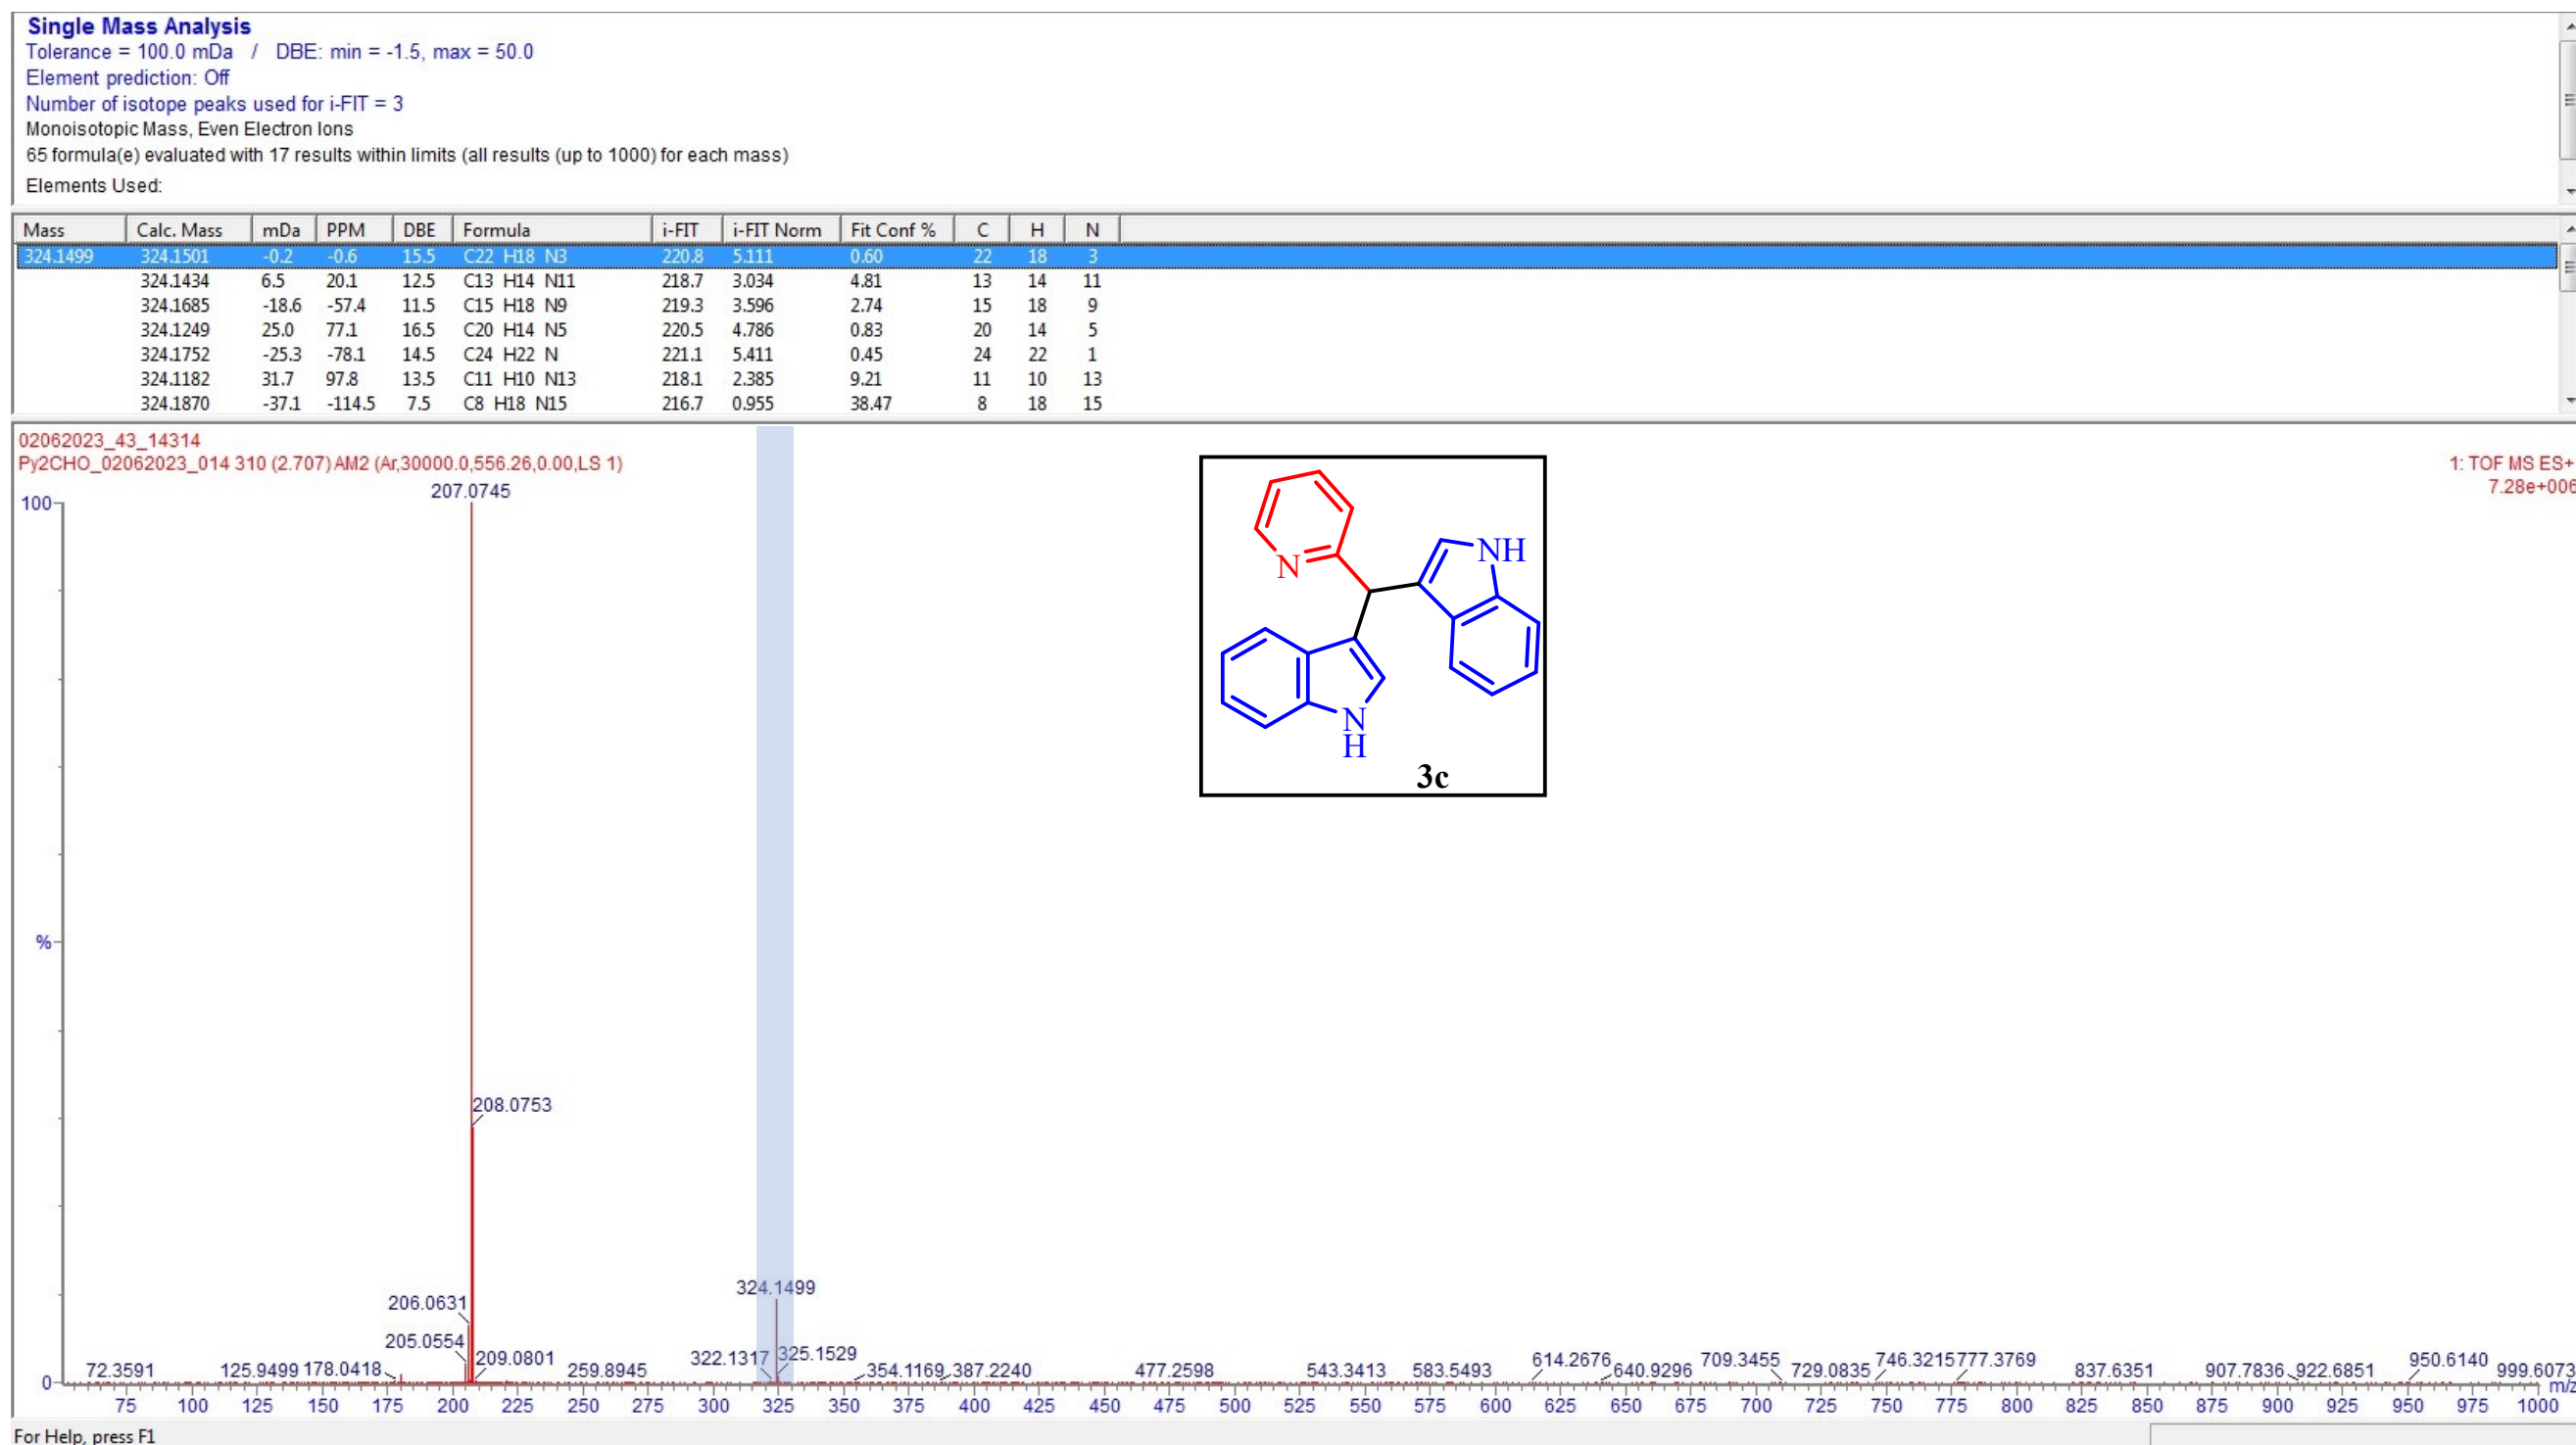

Figure 9. HRMS spectrum of compound **3c**

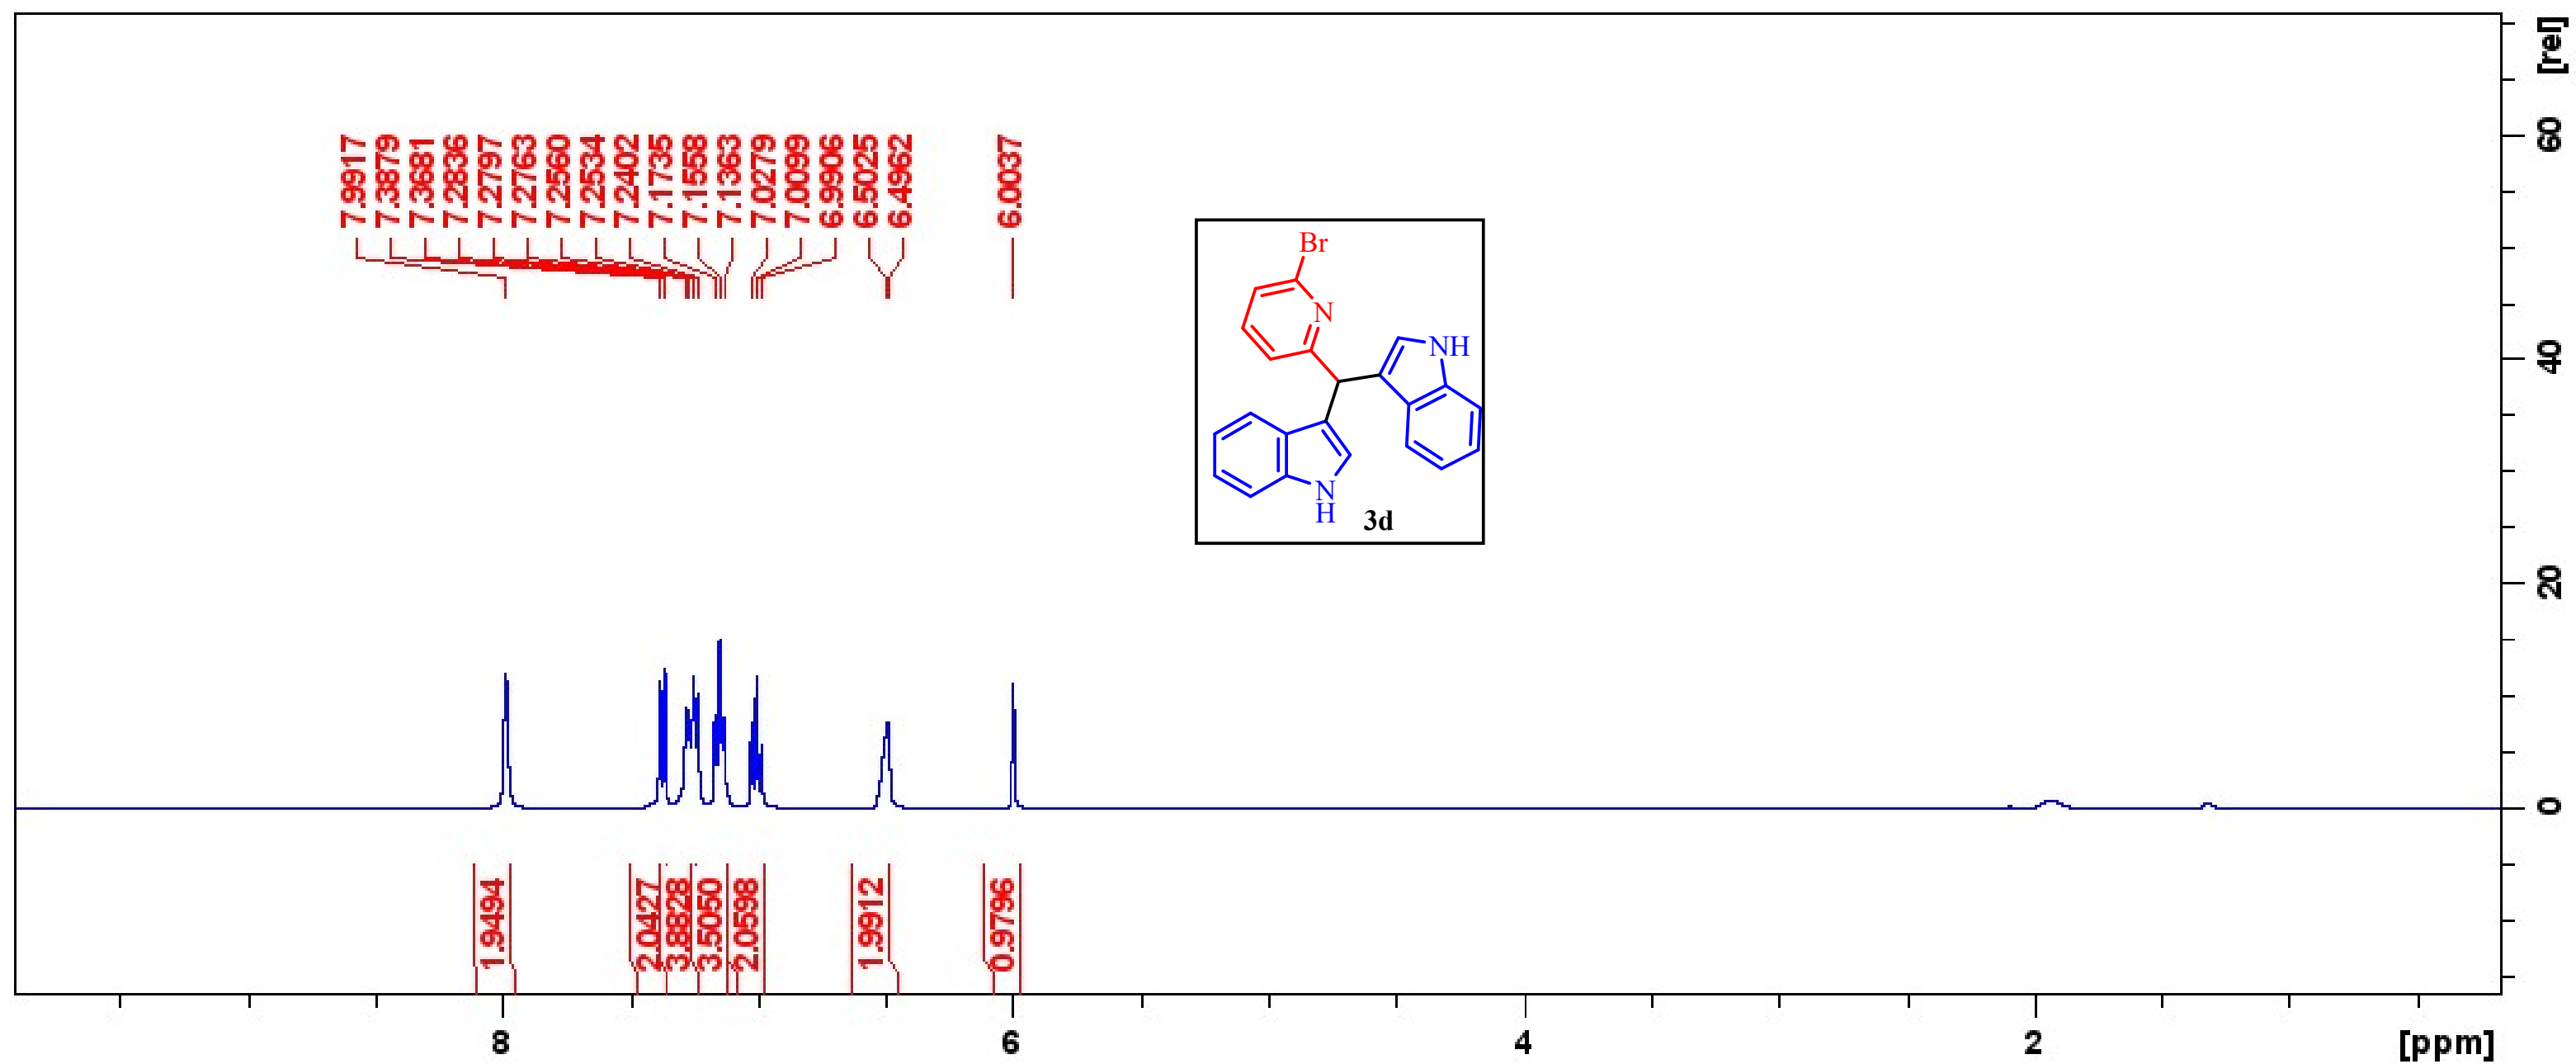

Figure 10. <sup>1</sup>H NMR spectrum of compound **3d**

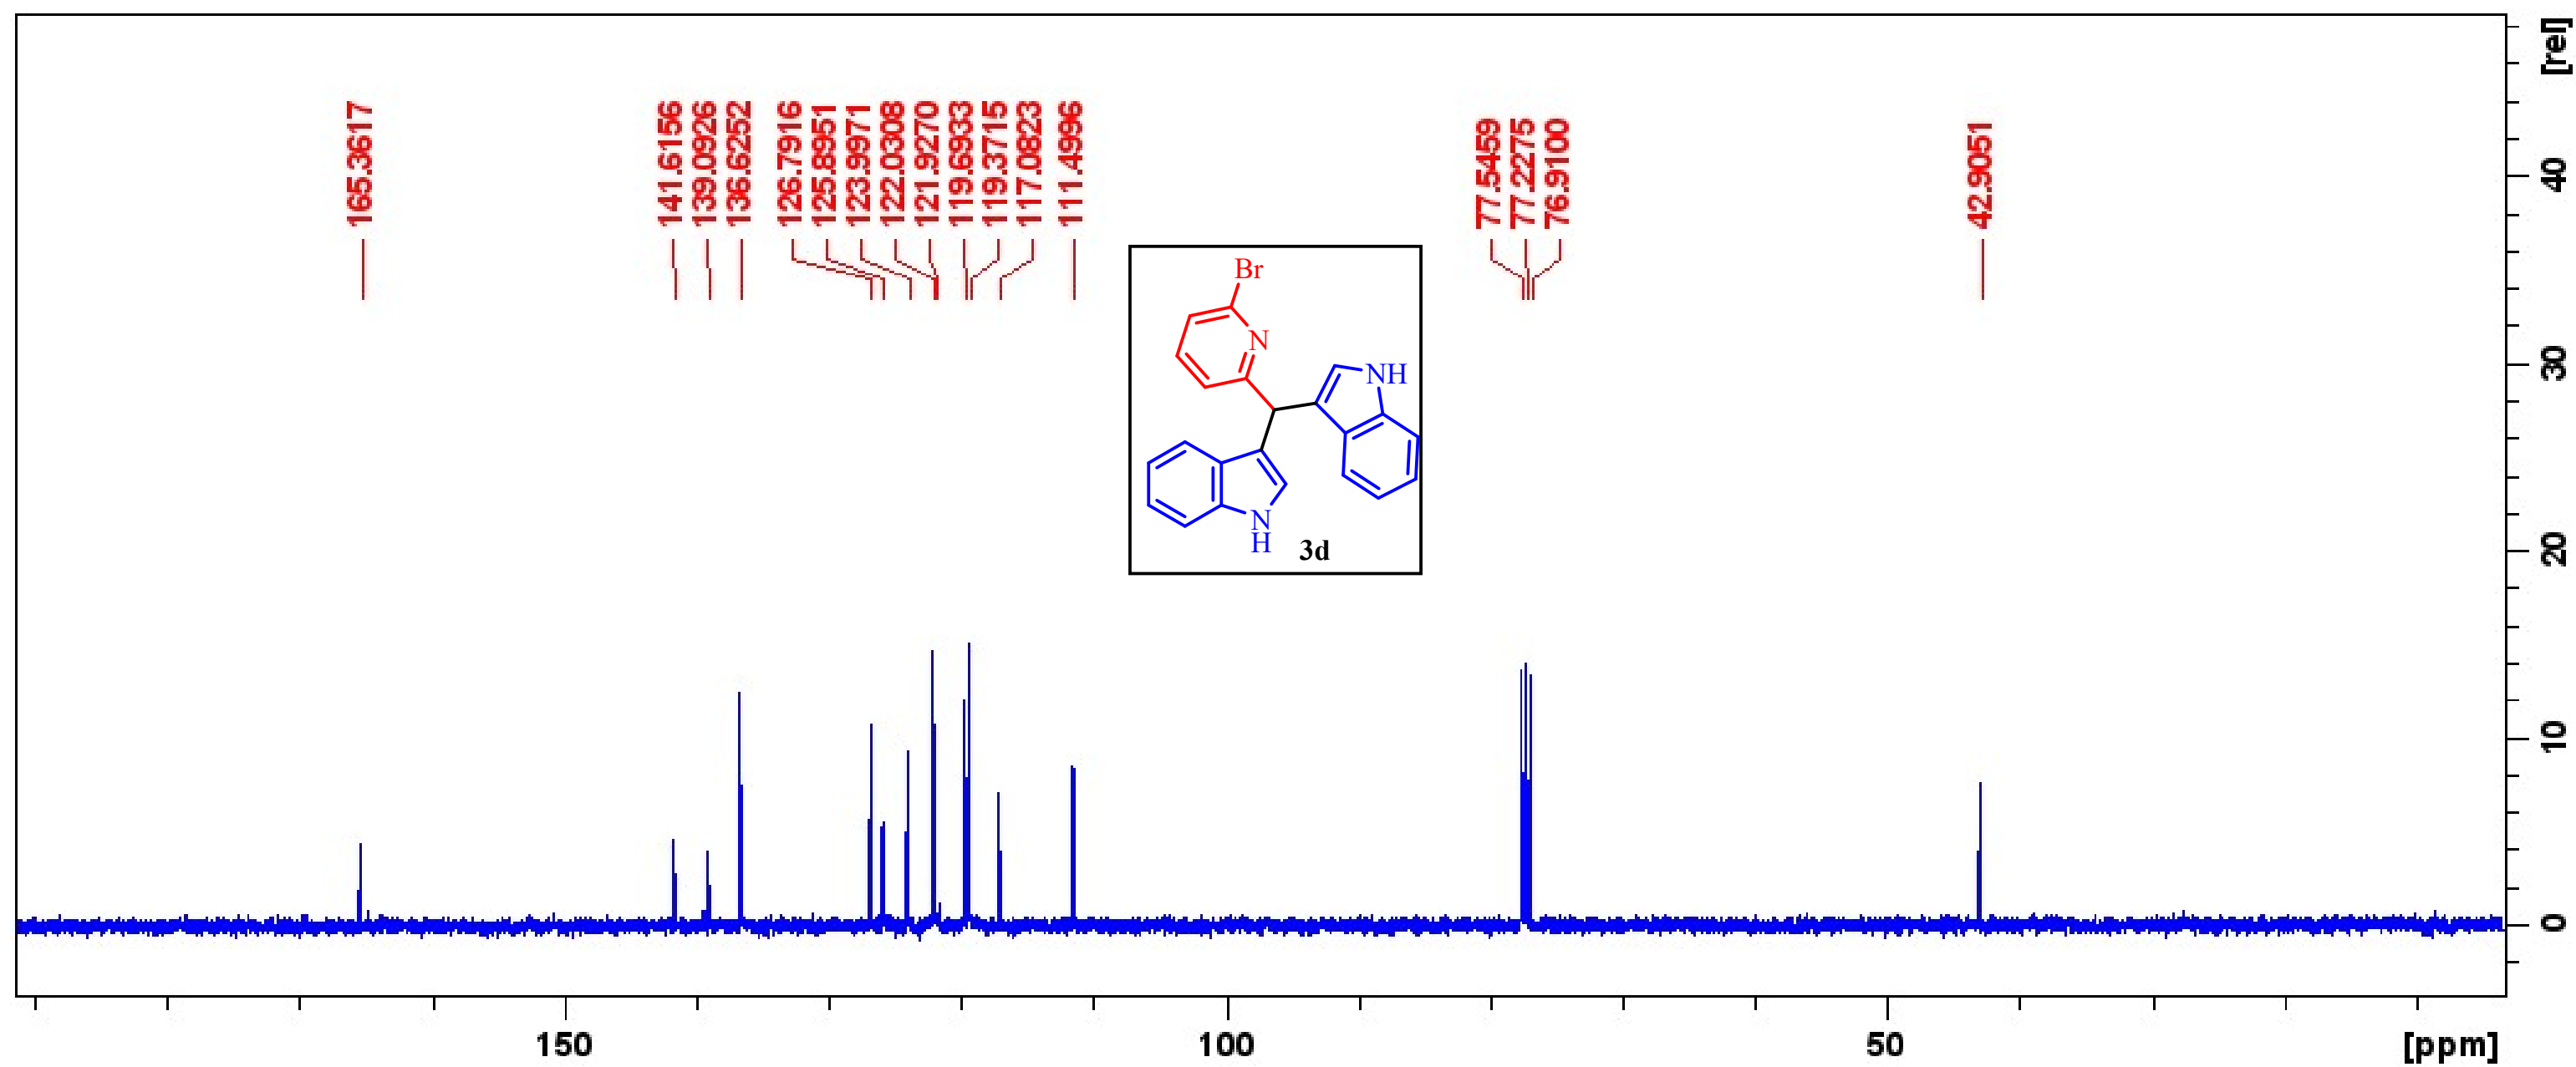

Figure 11. <sup>13</sup>C NMR spectrum of compound **3d**

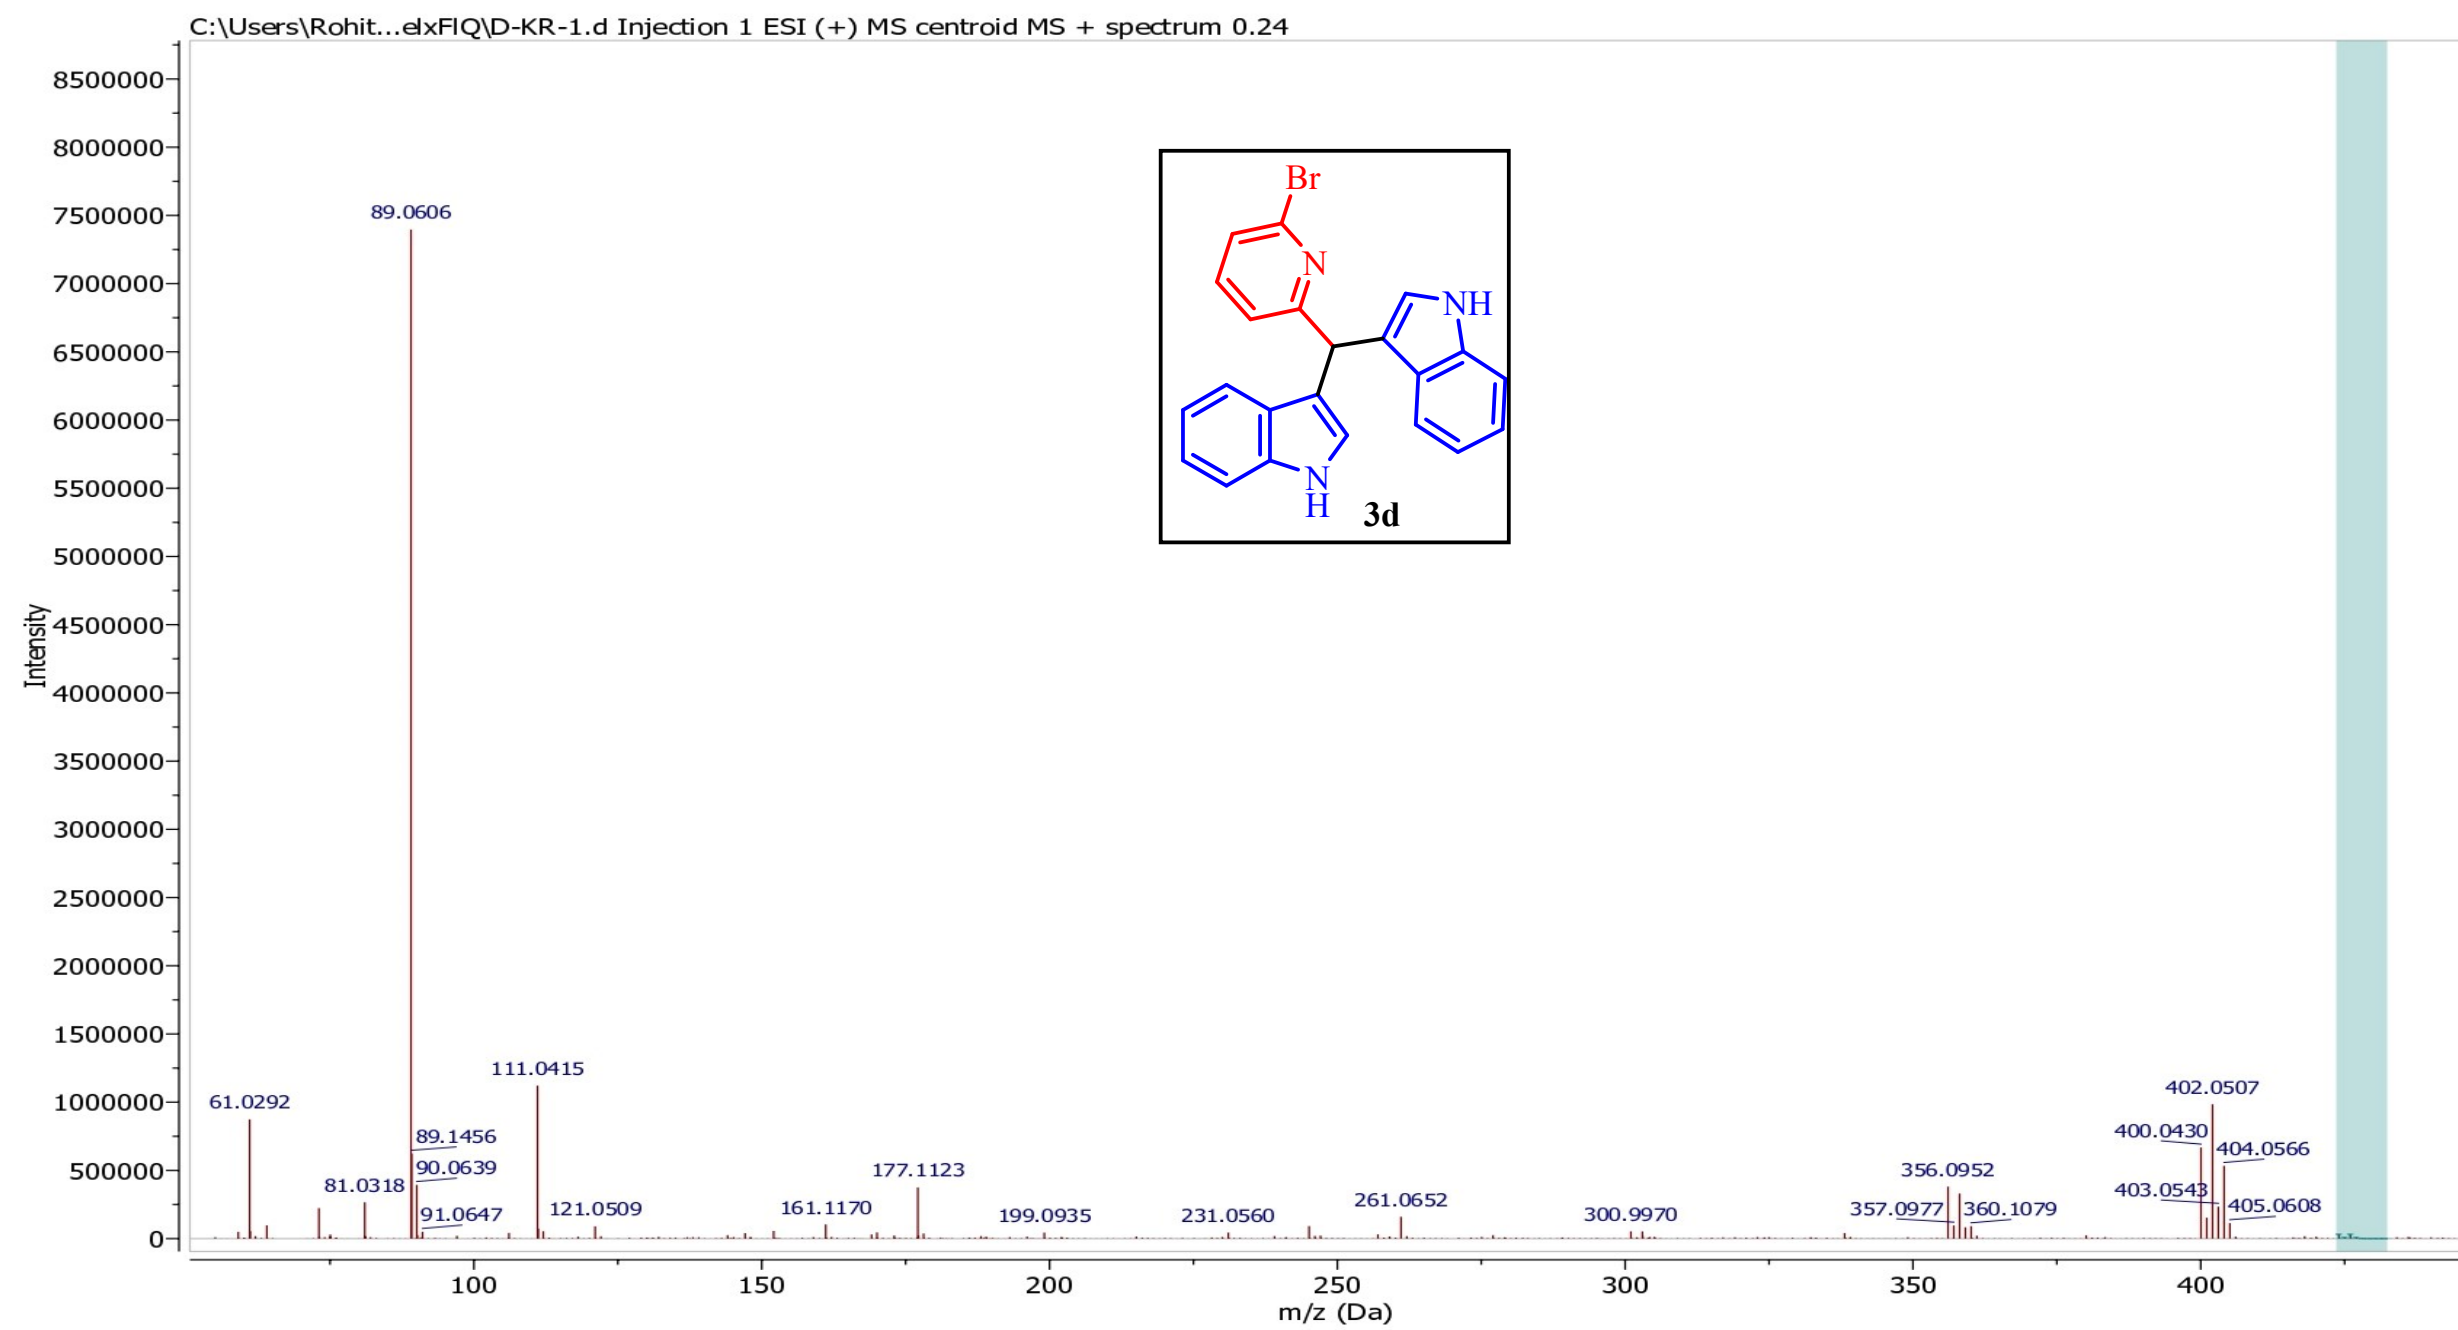

Figure 12. HRMS spectrum of compound **3d**

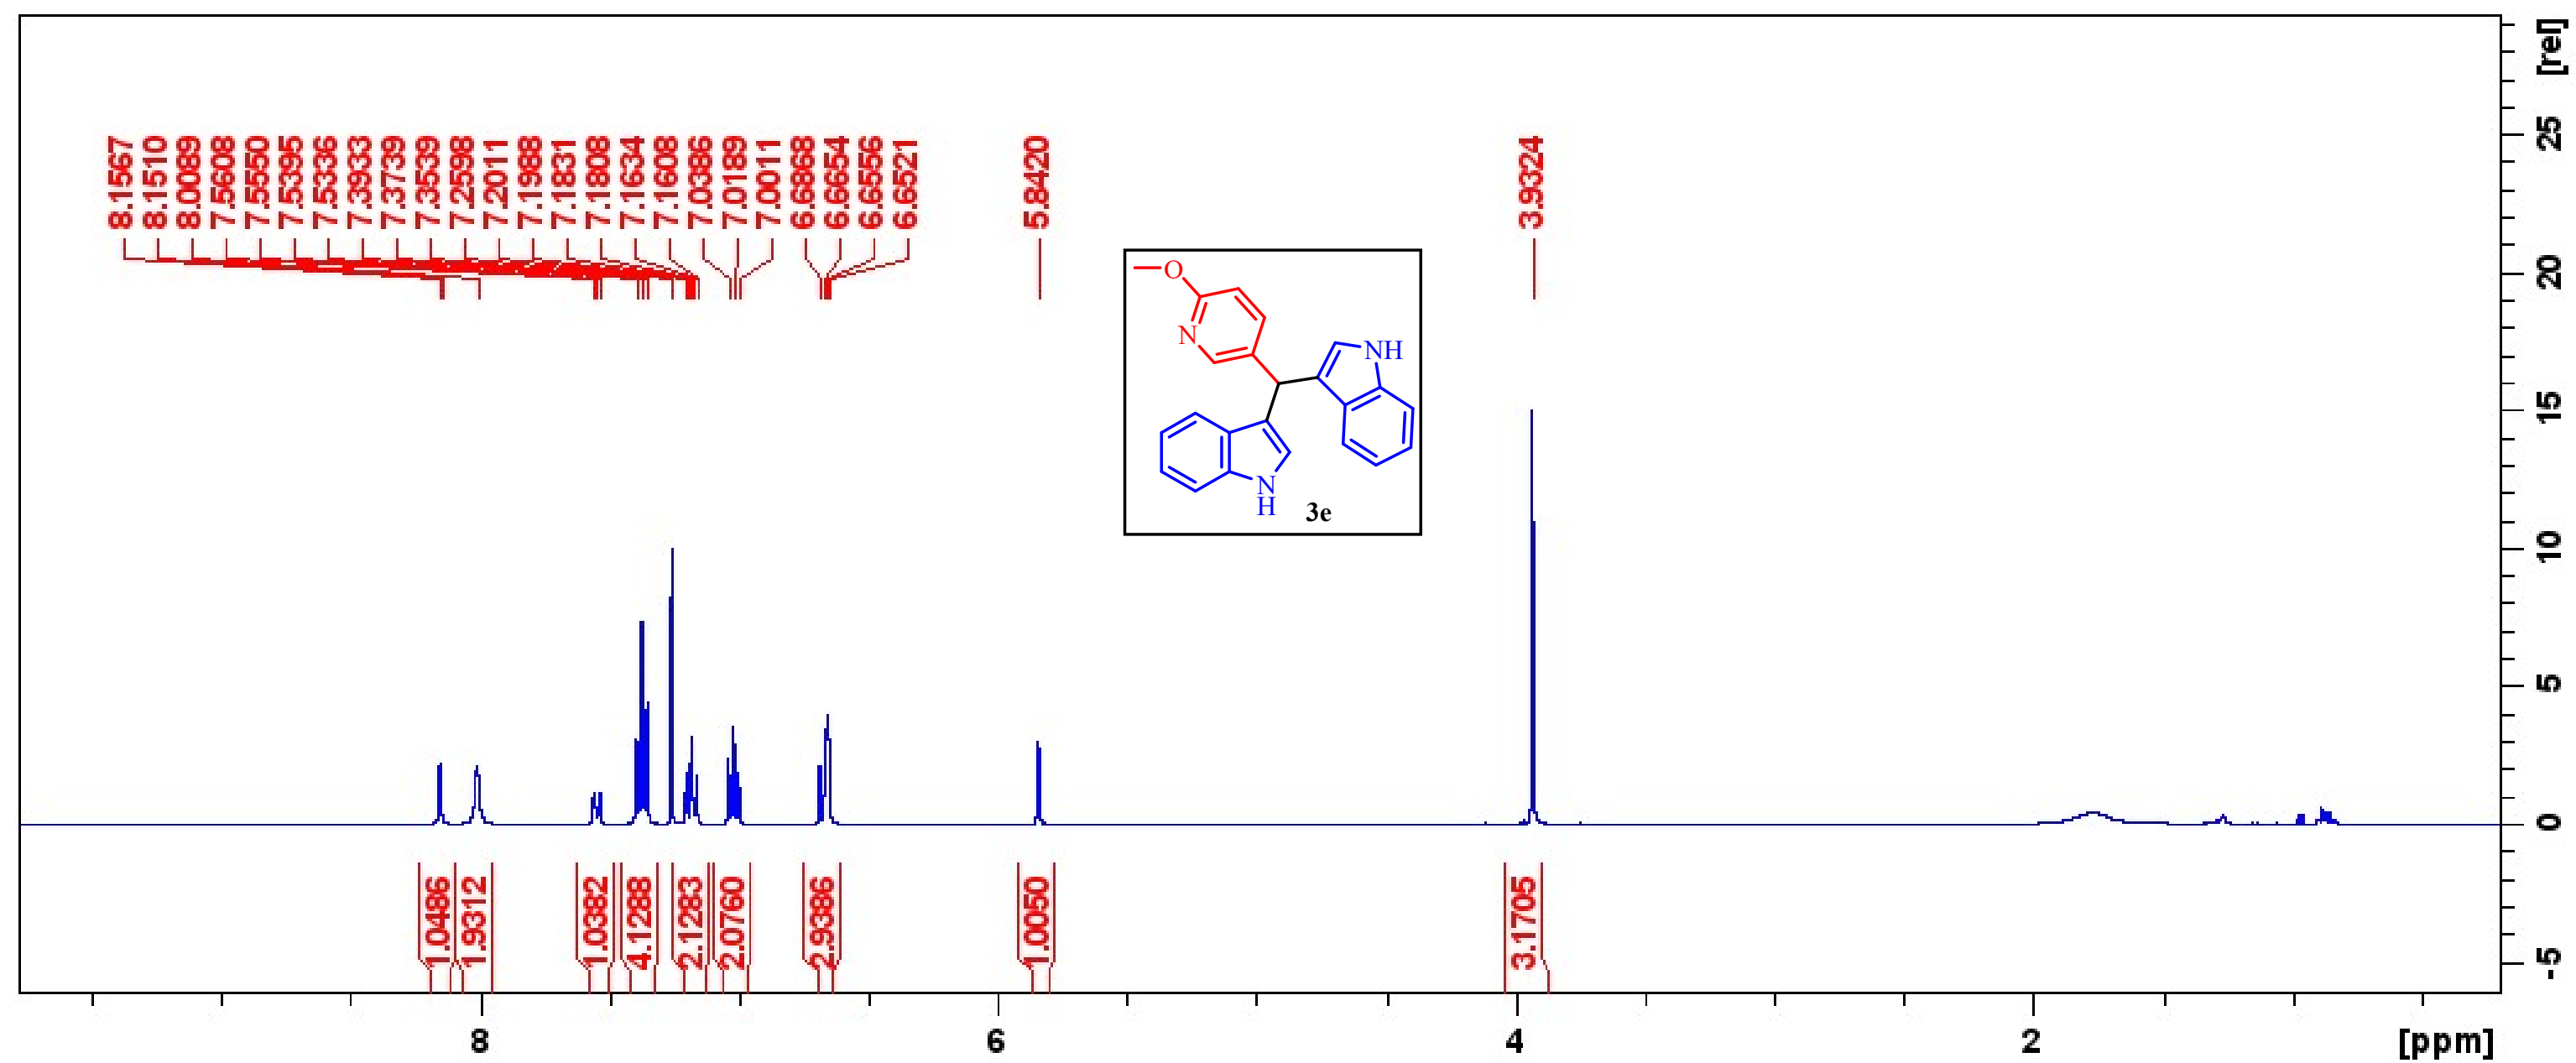

Figure 13. <sup>1</sup>H NMR spectrum of compound 3e



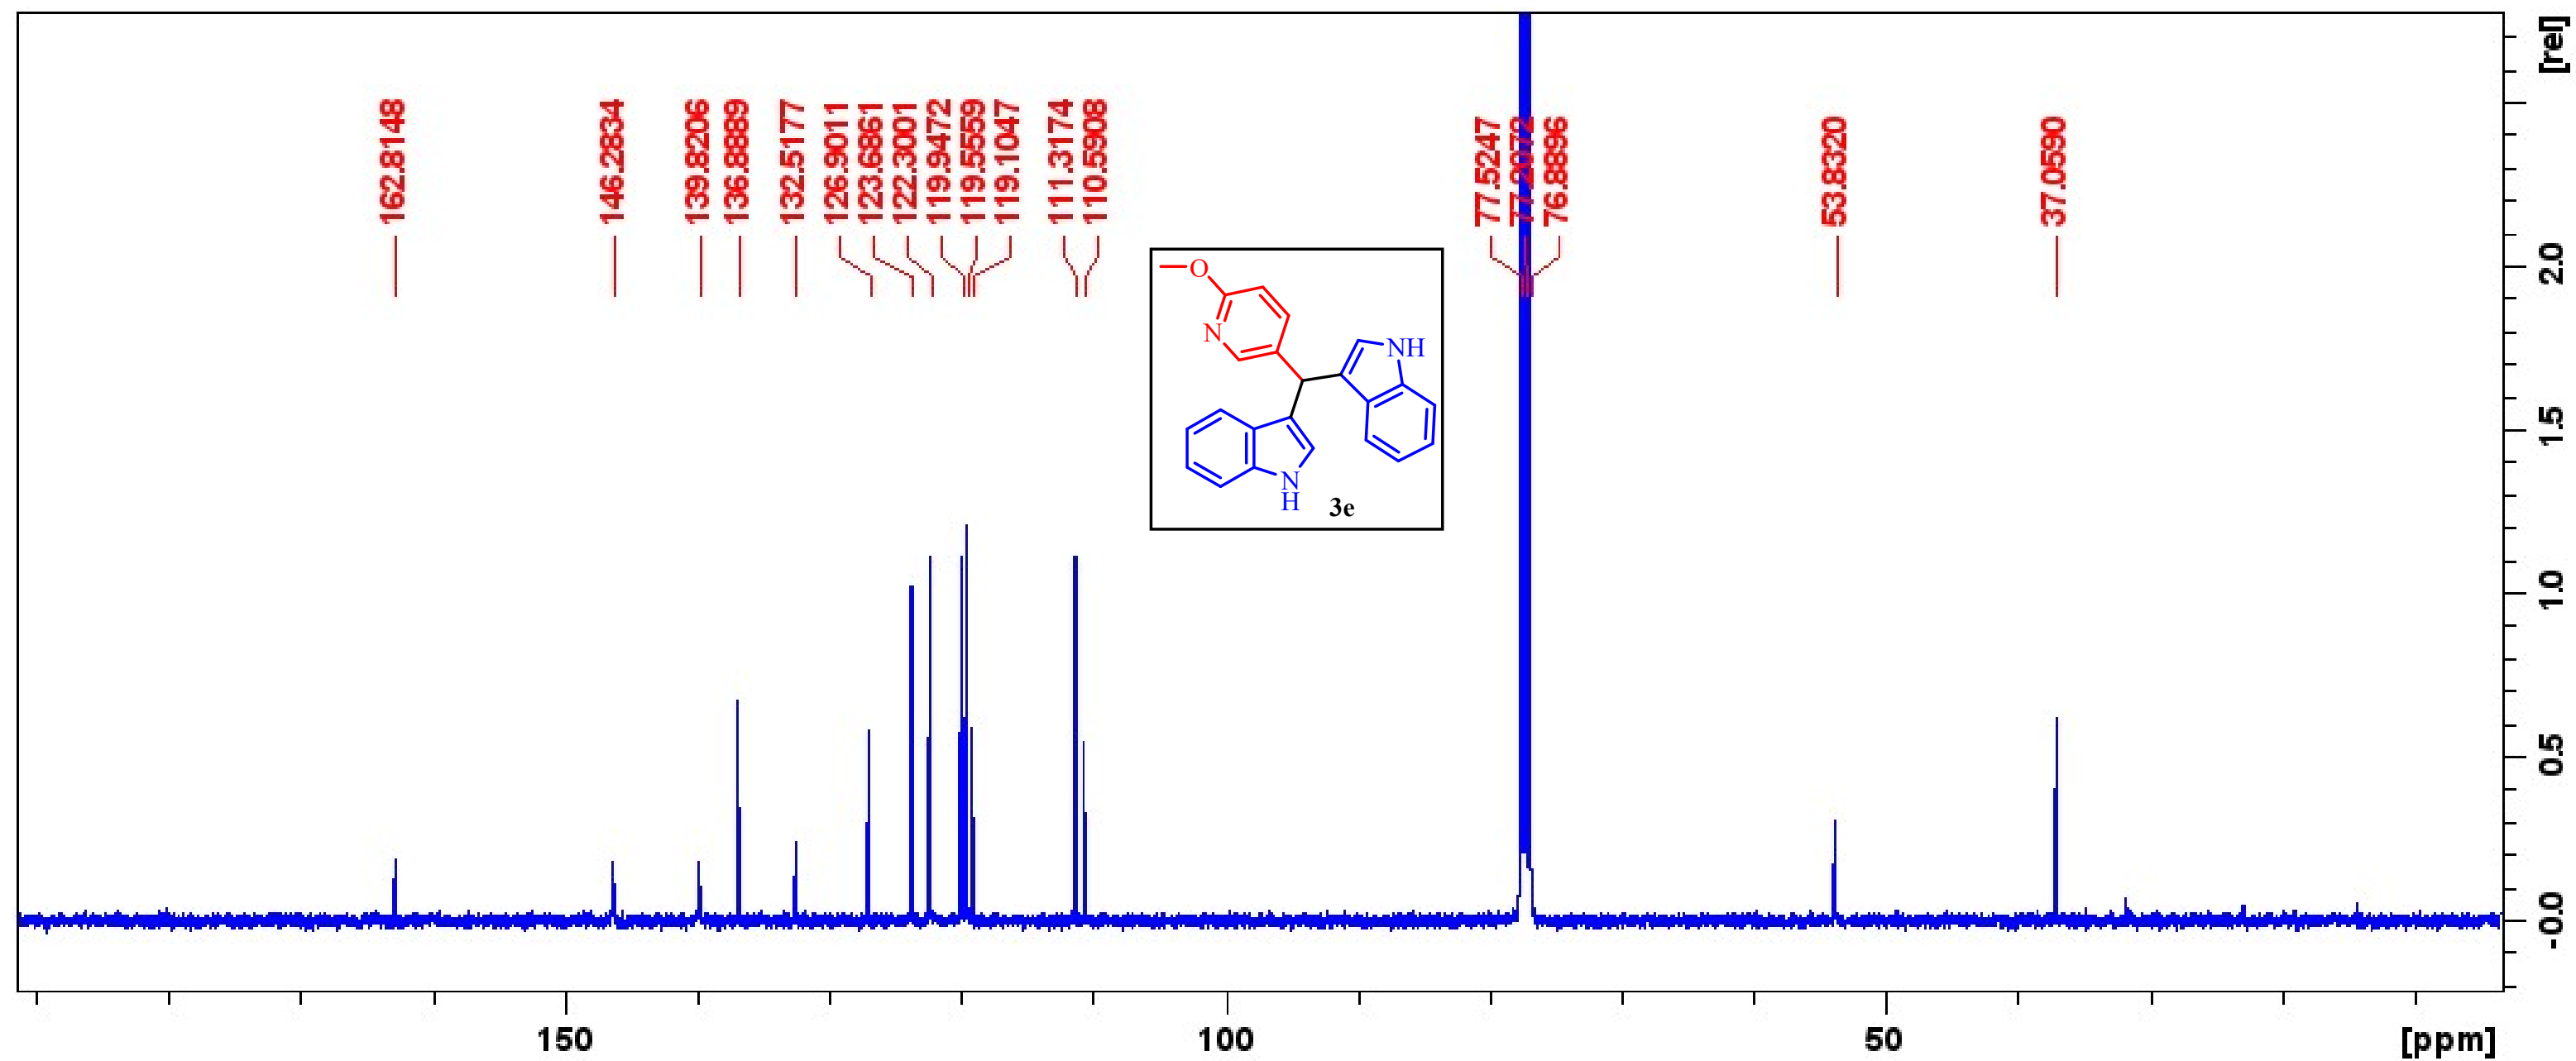

Figure 14. <sup>13</sup>C NMR spectrum of compound **3e**

### Single Mass Analysis

Tolerance = 100.0 mDa / DBE: min = -1.5, max = 50.0

Element prediction: Off

Number of isotope peaks used for i-FIT = 3

Monoisotopic Mass, Even Electron Ions

771 formula(e) evaluated with 176 results within limits (all results (up to 1000) for each mass)

Elements Used:

| Mass     | Calc. Mass | mDa  | PPM   | DBE  | Formula       | i-FIT | i-FIT Norm | Fit Conf % | C  | H  | N  | O  |
|----------|------------|------|-------|------|---------------|-------|------------|------------|----|----|----|----|
| 354.1602 | 354.1598   | 0.4  | 1.1   | 3.5  | C7 H20 N11 O6 | 707.8 | 5.001      | 0.67       | 7  | 20 | 11 | 6  |
|          | 354.1606   | -0.4 | -1.1  | 15.5 | C23 H20 N3 O  | 710.6 | 7.796      | 0.04       | 23 | 20 | 3  | 1  |
|          | 354.1611   | -0.9 | -2.5  | 8.5  | C8 H16 N15 O2 | 708.1 | 5.246      | 0.53       | 8  | 16 | 15 | 2  |
|          | 354.1585   | 1.7  | 4.8   | -1.5 | C6 H24 N7 O10 | 709.3 | 6.520      | 0.15       | 6  | 24 | 7  | 10 |
|          | 354.1625   | -2.3 | -6.5  | 2.5  | C11 H24 N5 O8 | 710.2 | 7.344      | 0.06       | 11 | 24 | 5  | 8  |
|          | 354.1566   | 3.6  | 10.2  | 11.5 | C18 H20 N5 O3 | 709.8 | 6.997      | 0.09       | 18 | 20 | 5  | 3  |
|          | 354.1638   | -3.6 | -10.2 | 7.5  | C12 H20 N9 O4 | 708.7 | 5.913      | 0.27       | 12 | 20 | 9  | 4  |

02062023\_43\_14310

6Me3PyCHO\_02062023\_008 383 (3.340)AM2 (Ar,30000.0,556.25,0.00,LS 1)

1: TOF MS ES+  
4.95e+007

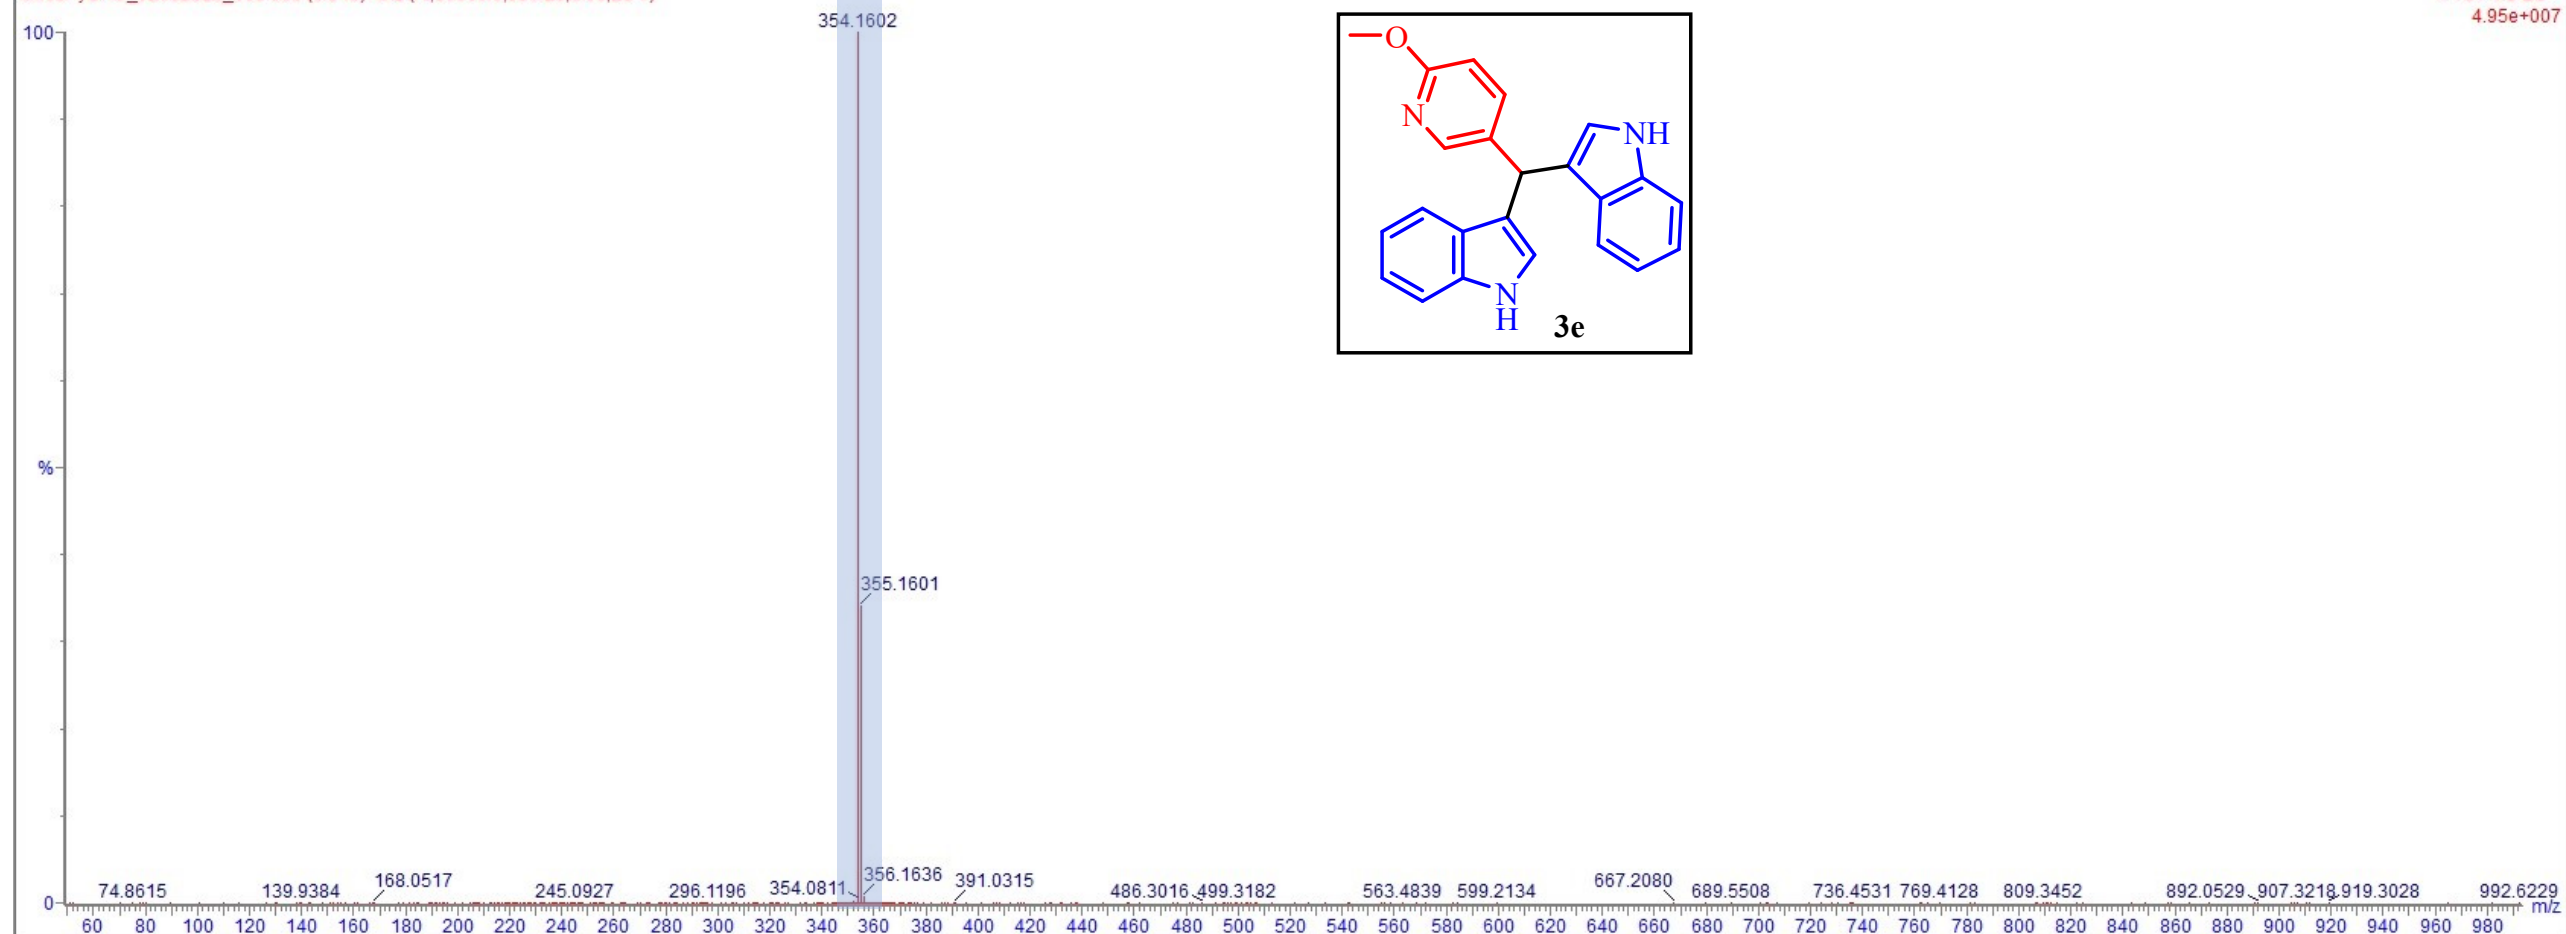

Figure 15. HRMS spectrum of compound **3e**

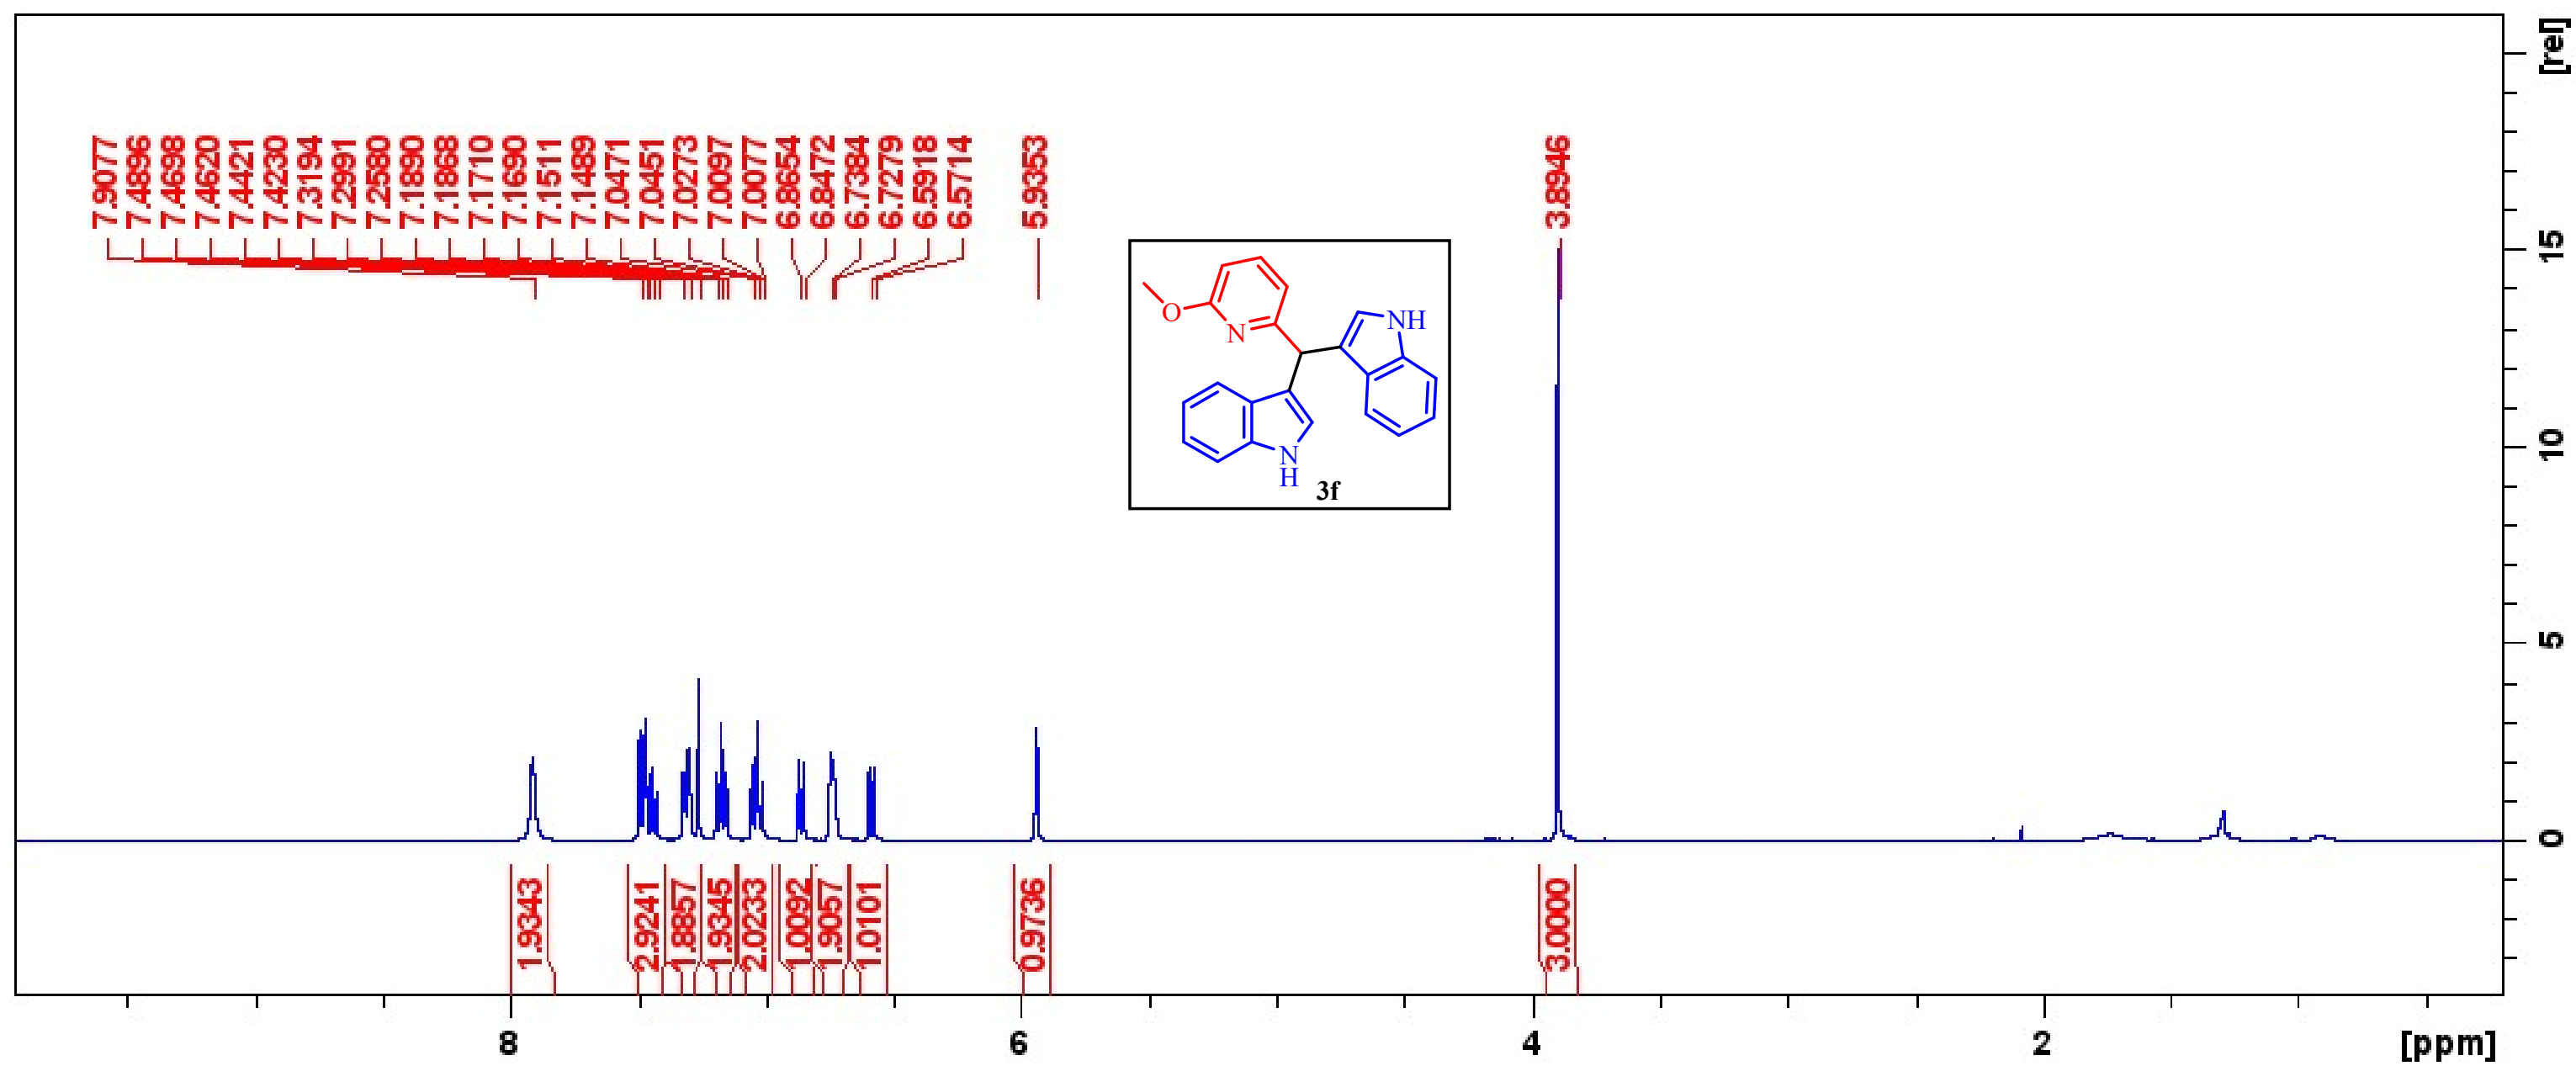

Figure 16. <sup>1</sup>H NMR spectrum of compound 3f

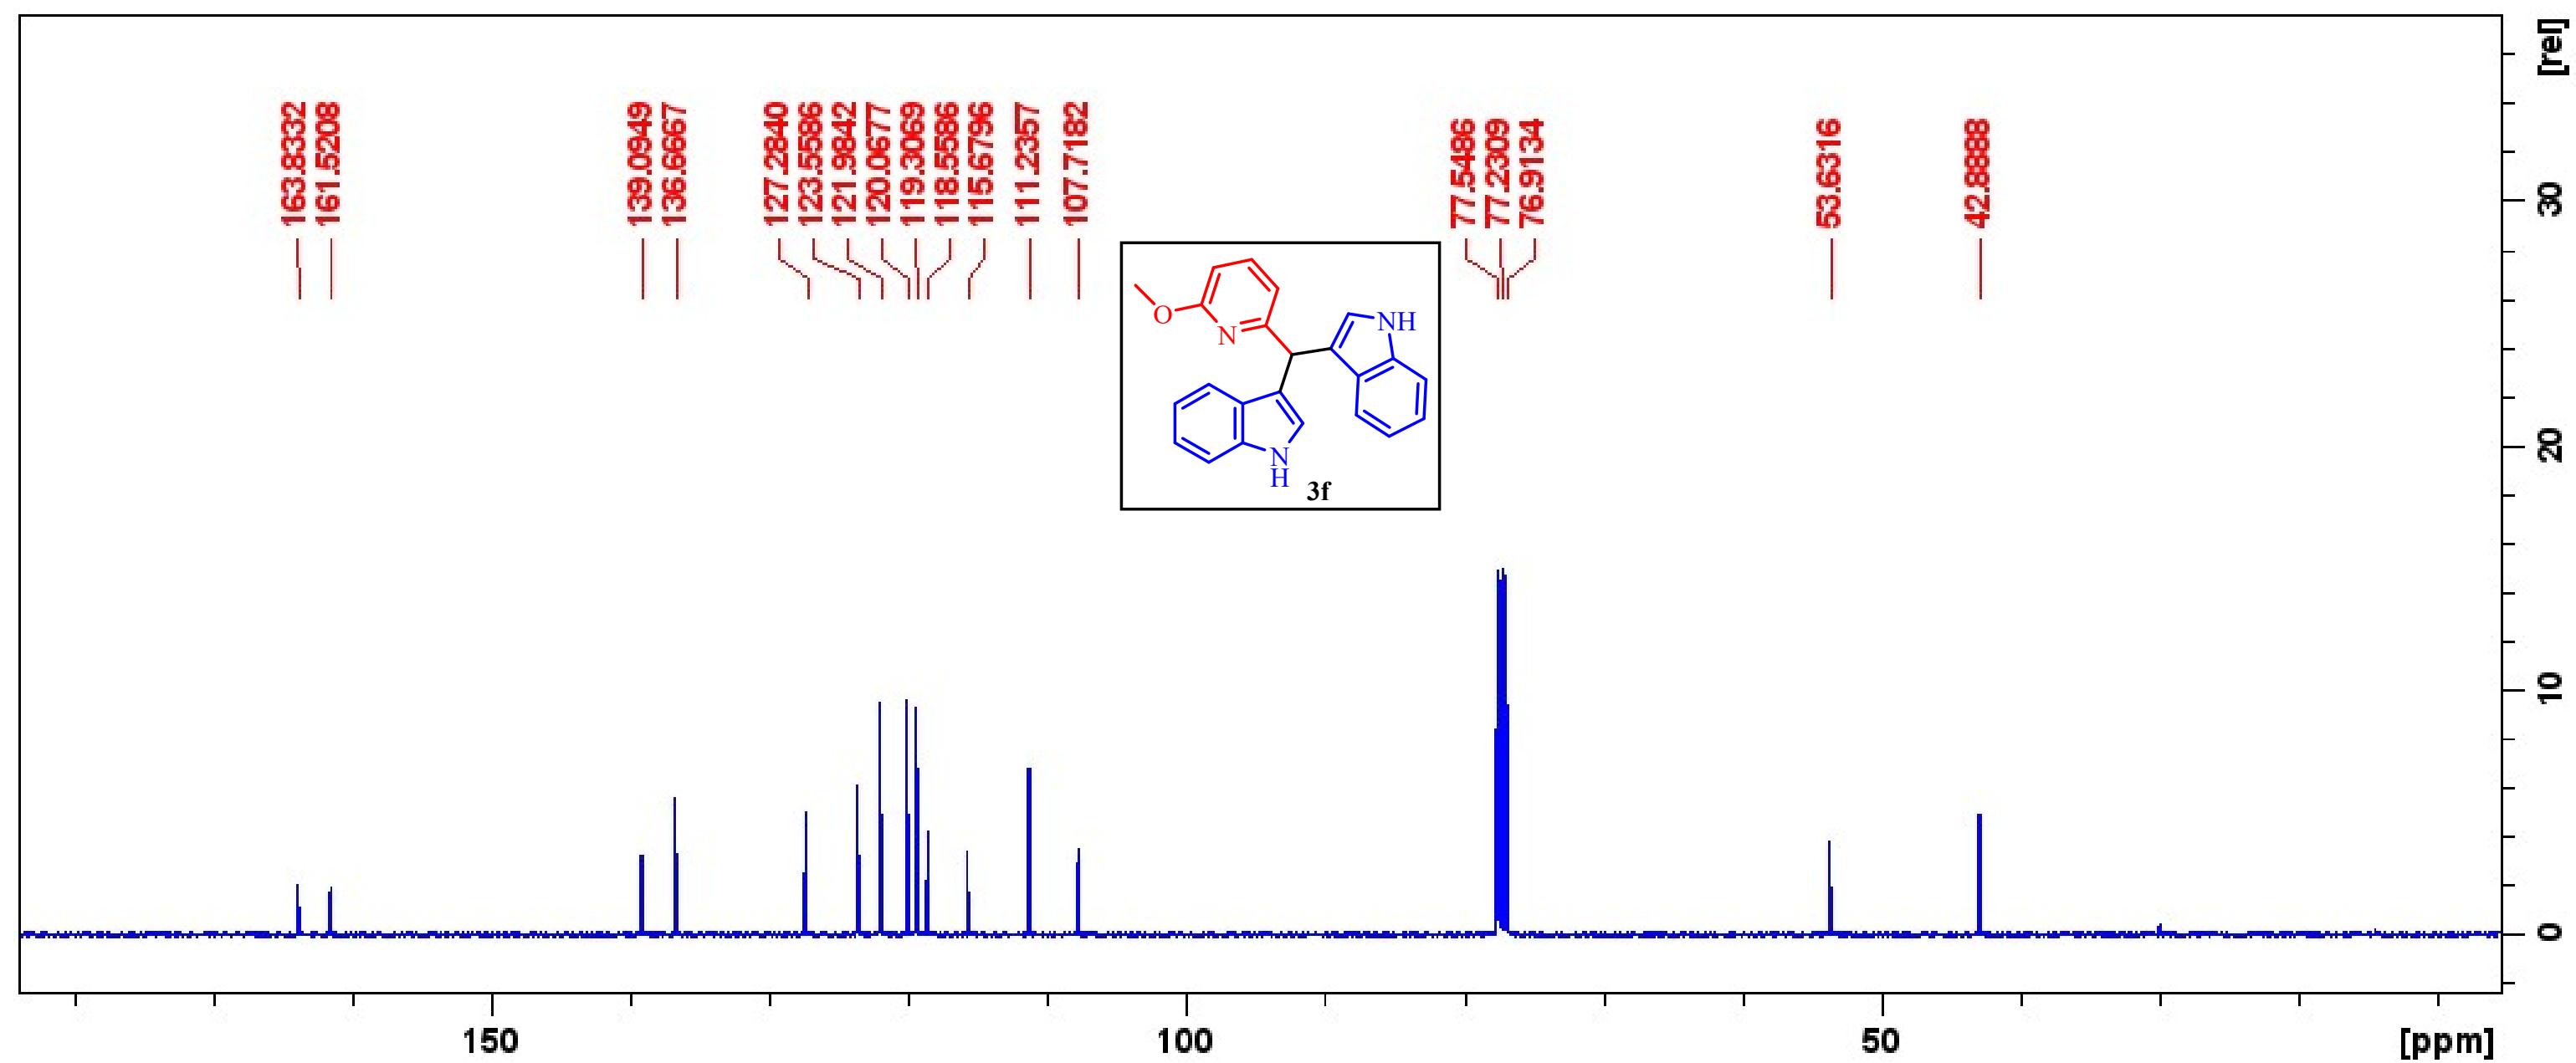

Figure 17. <sup>13</sup>C NMR spectrum of compound **3f**

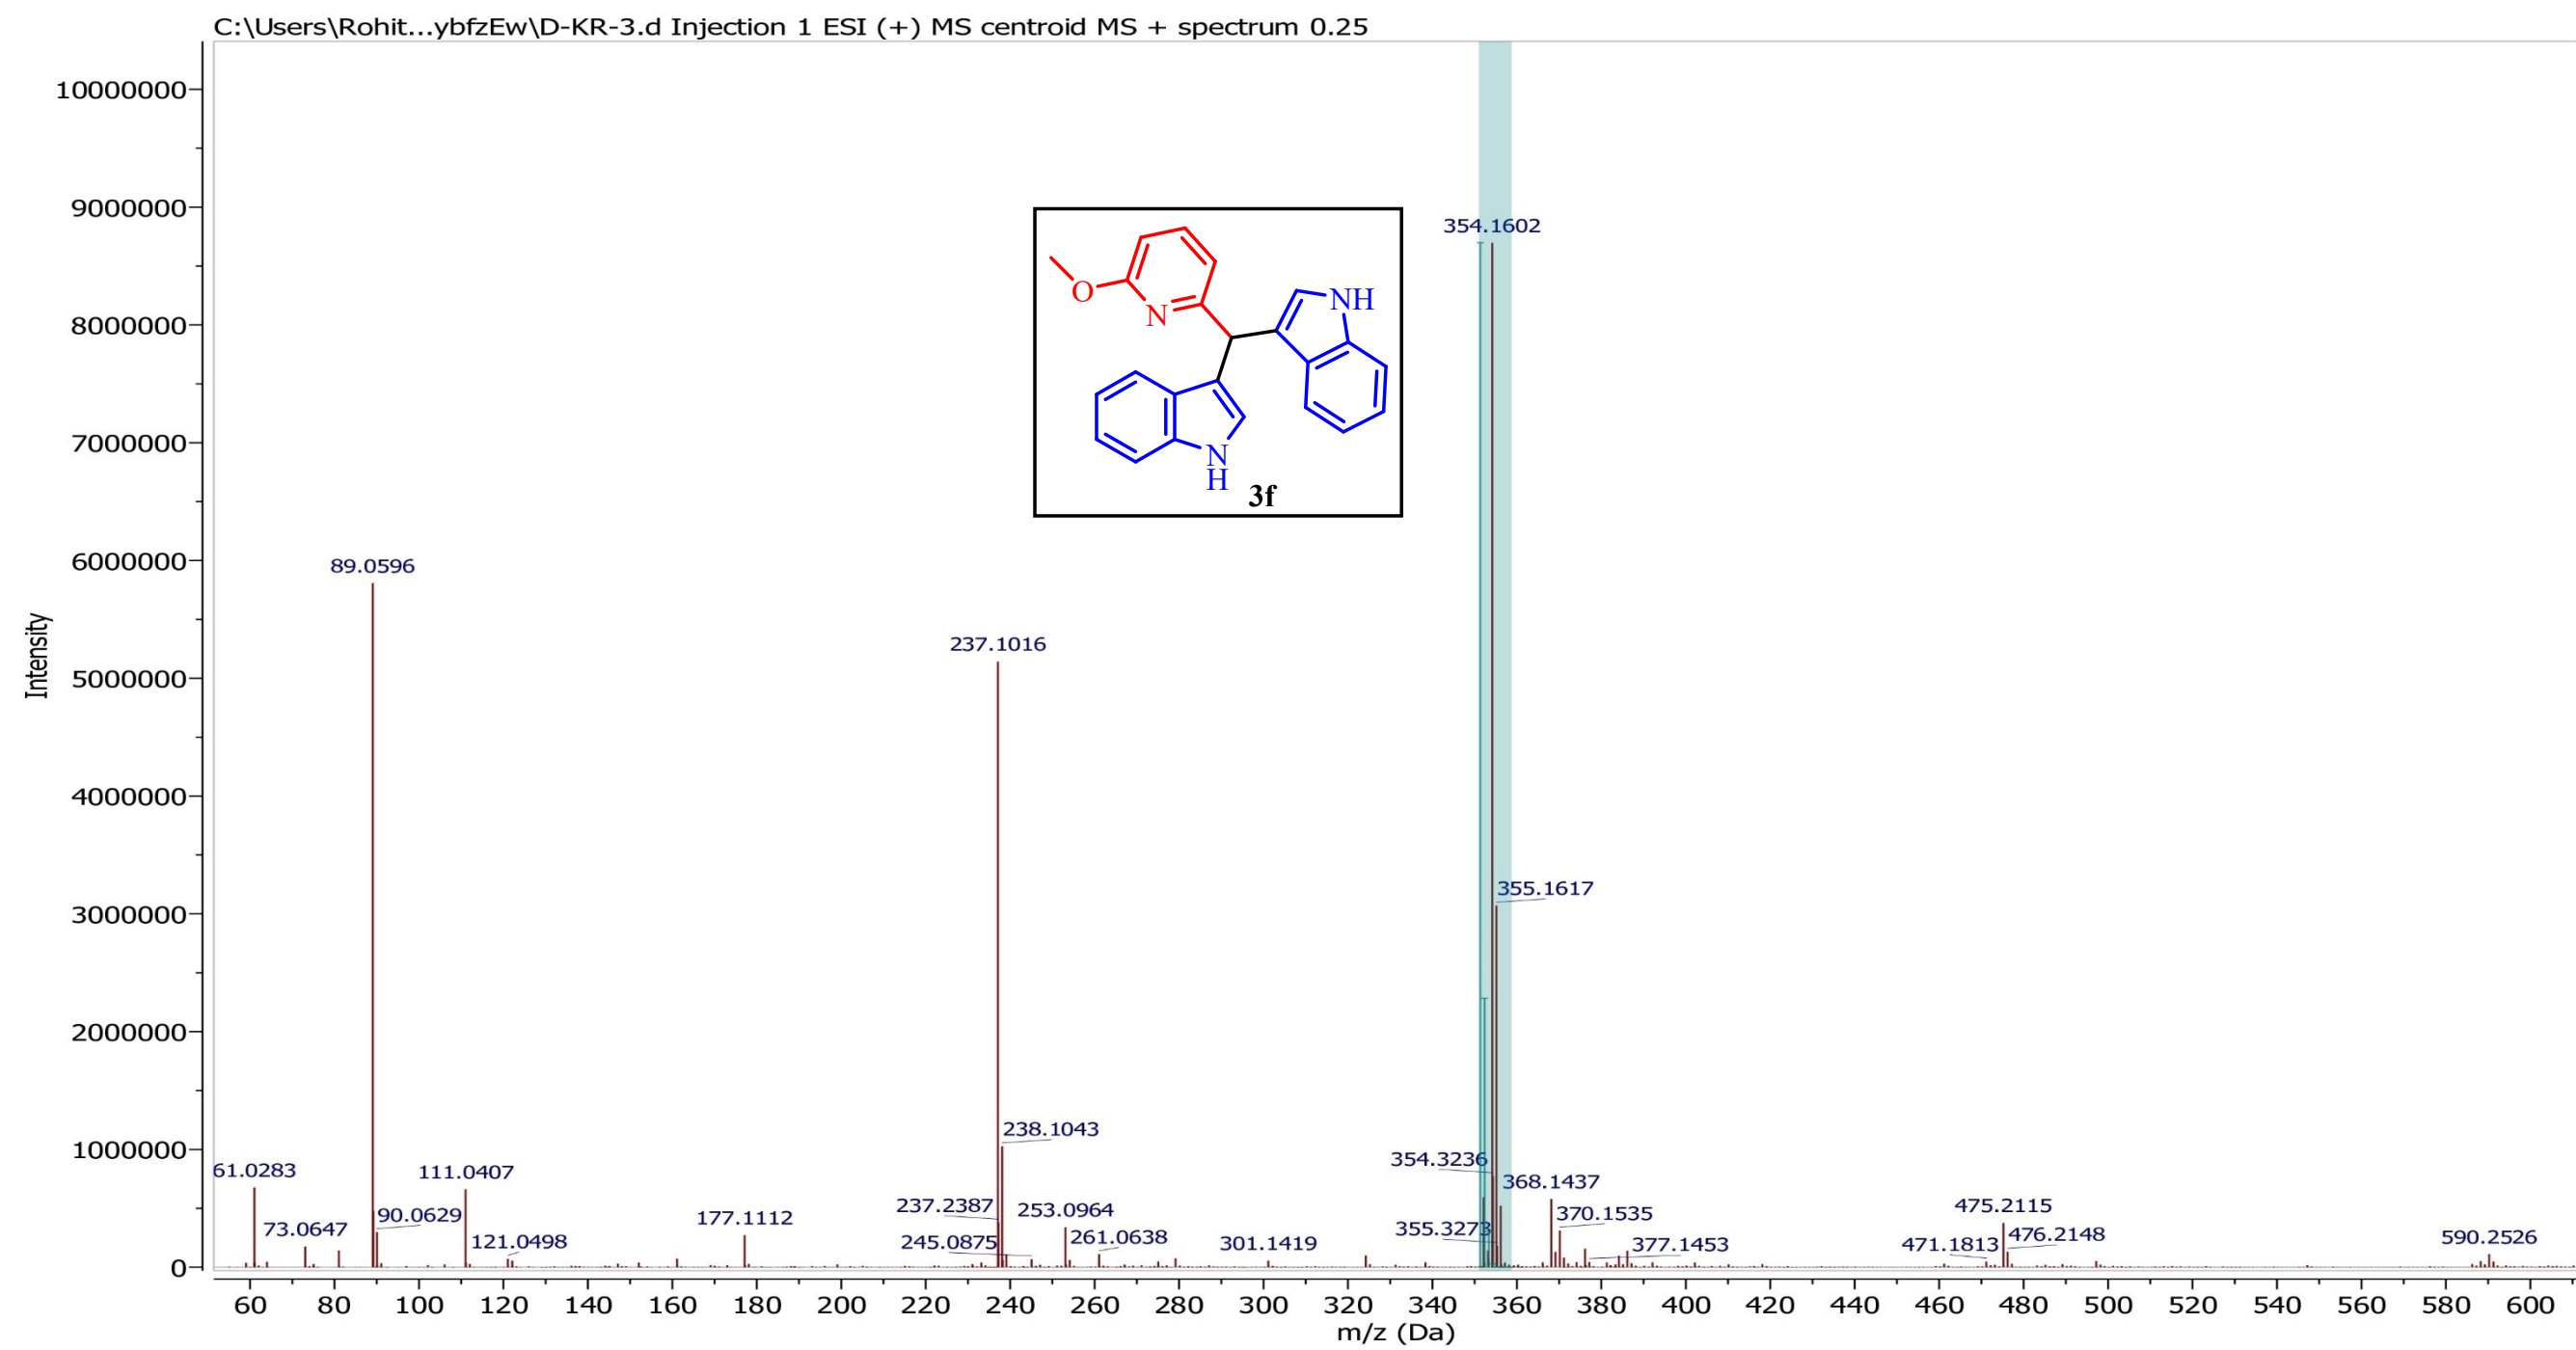

Figure 18. HRMS spectrum of compound **3f**

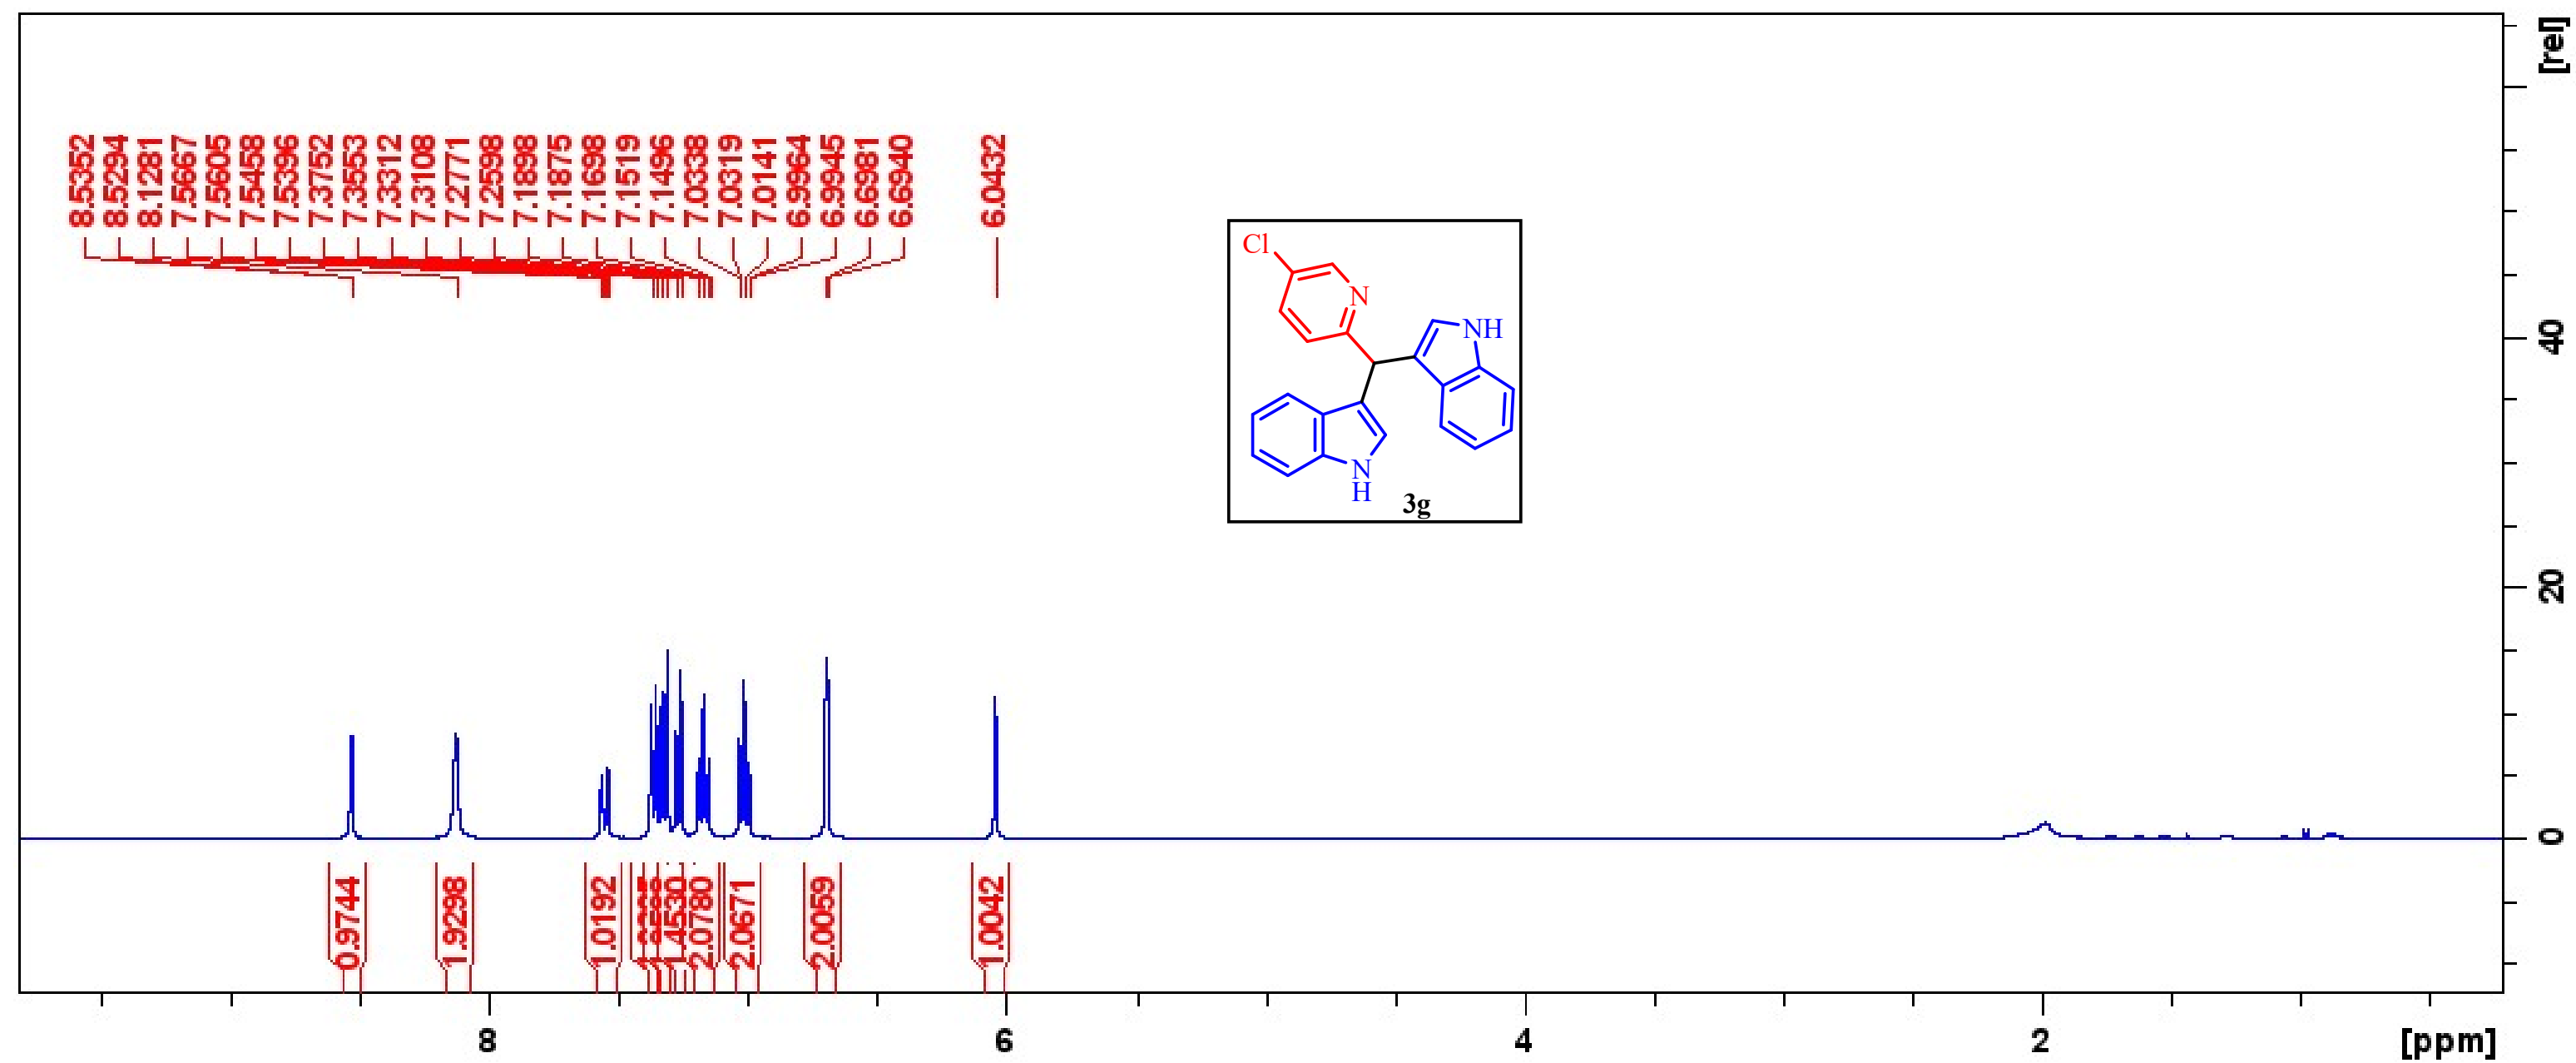

Figure 19. <sup>1</sup>H NMR spectrum of compound **3g**

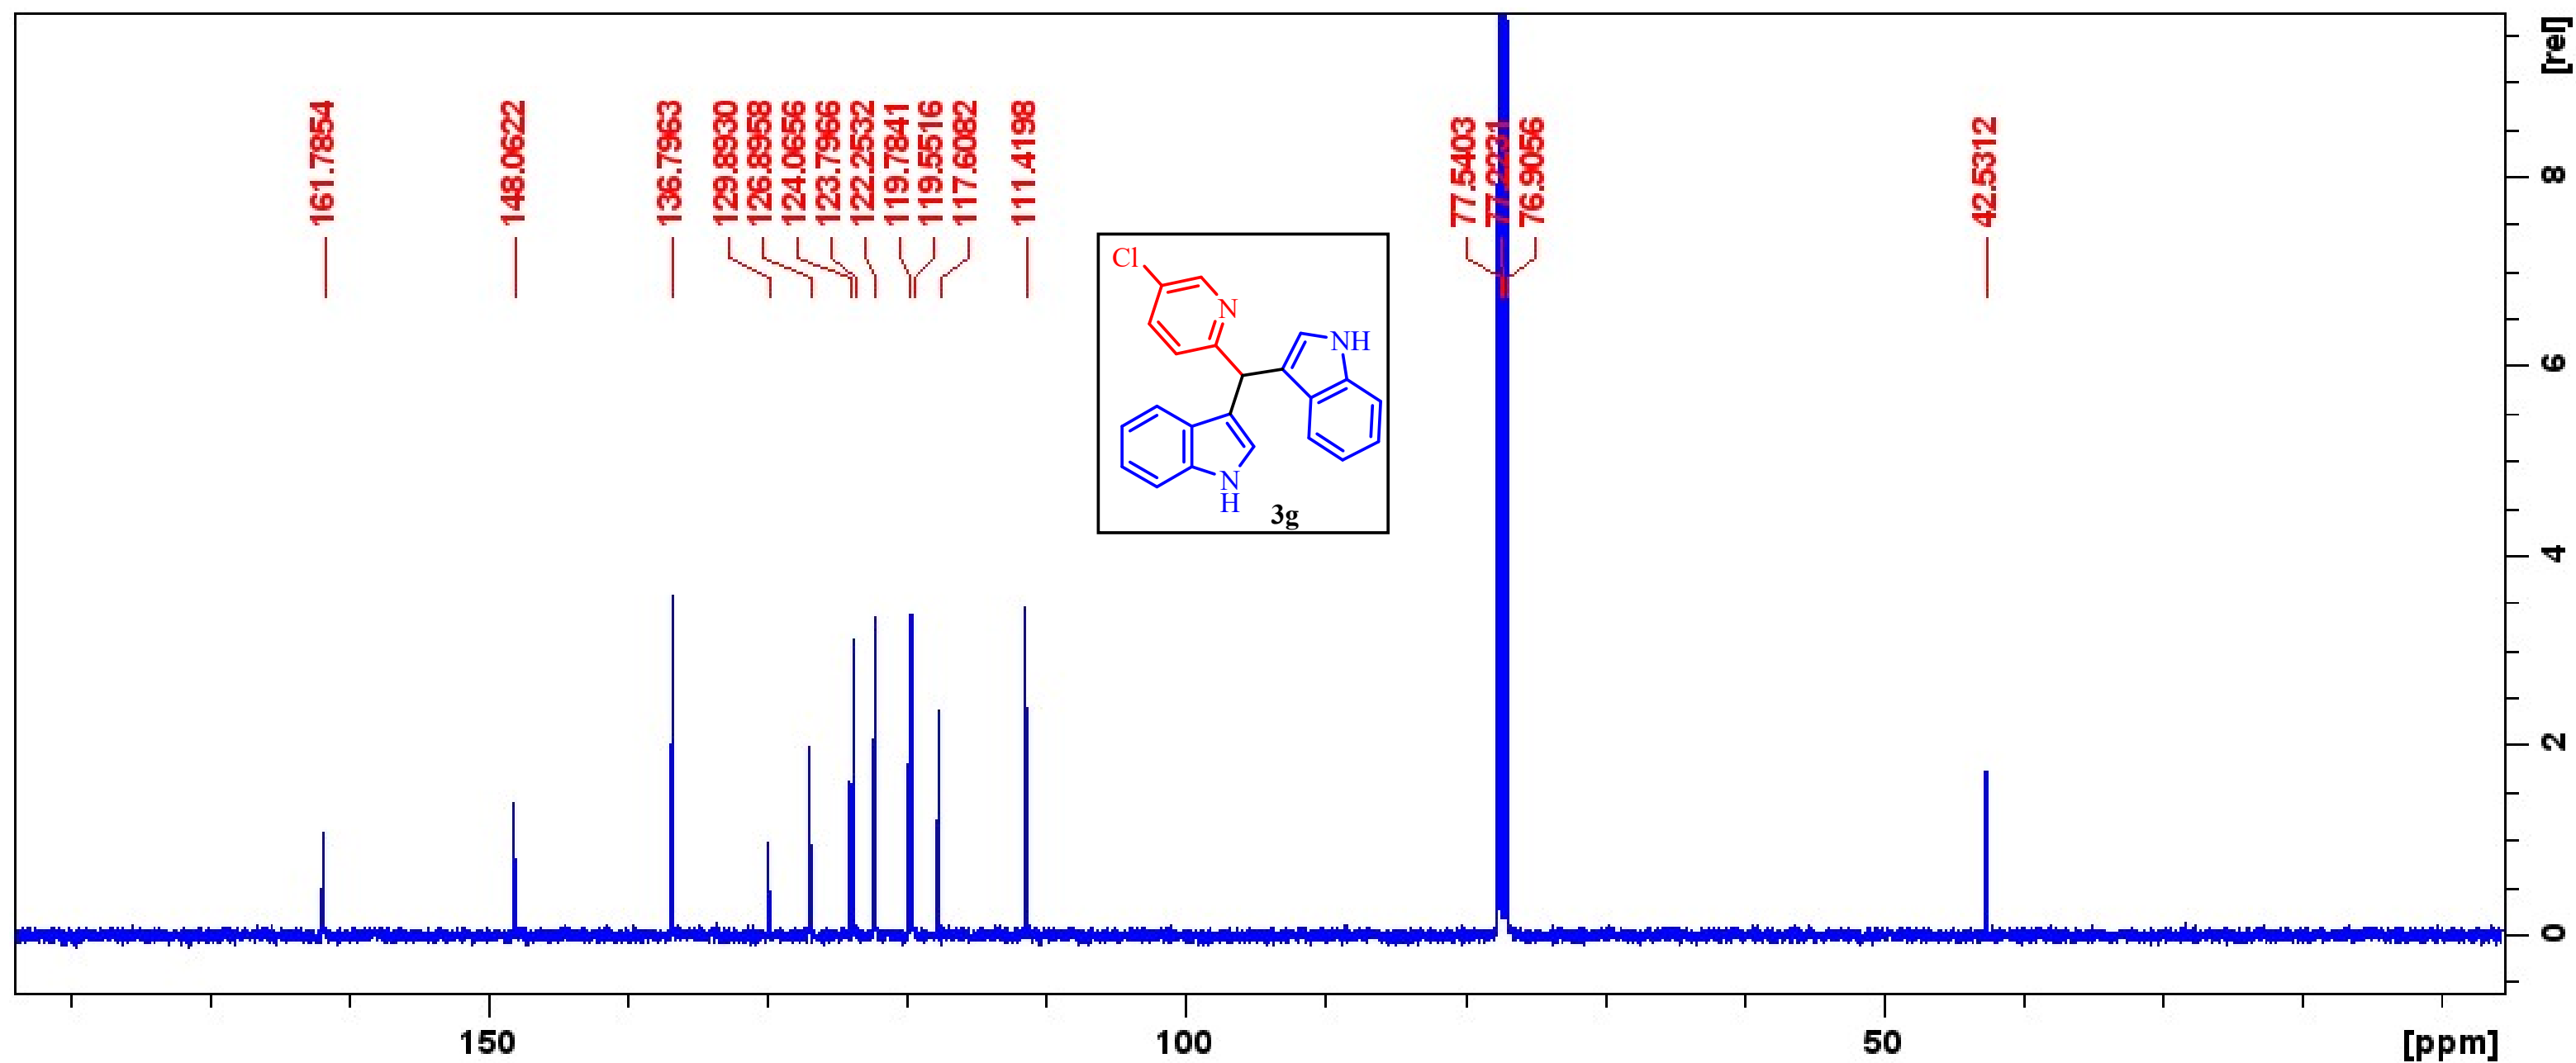

Figure 20.  $^{13}\text{C}$  NMR spectrum of compound **3g**

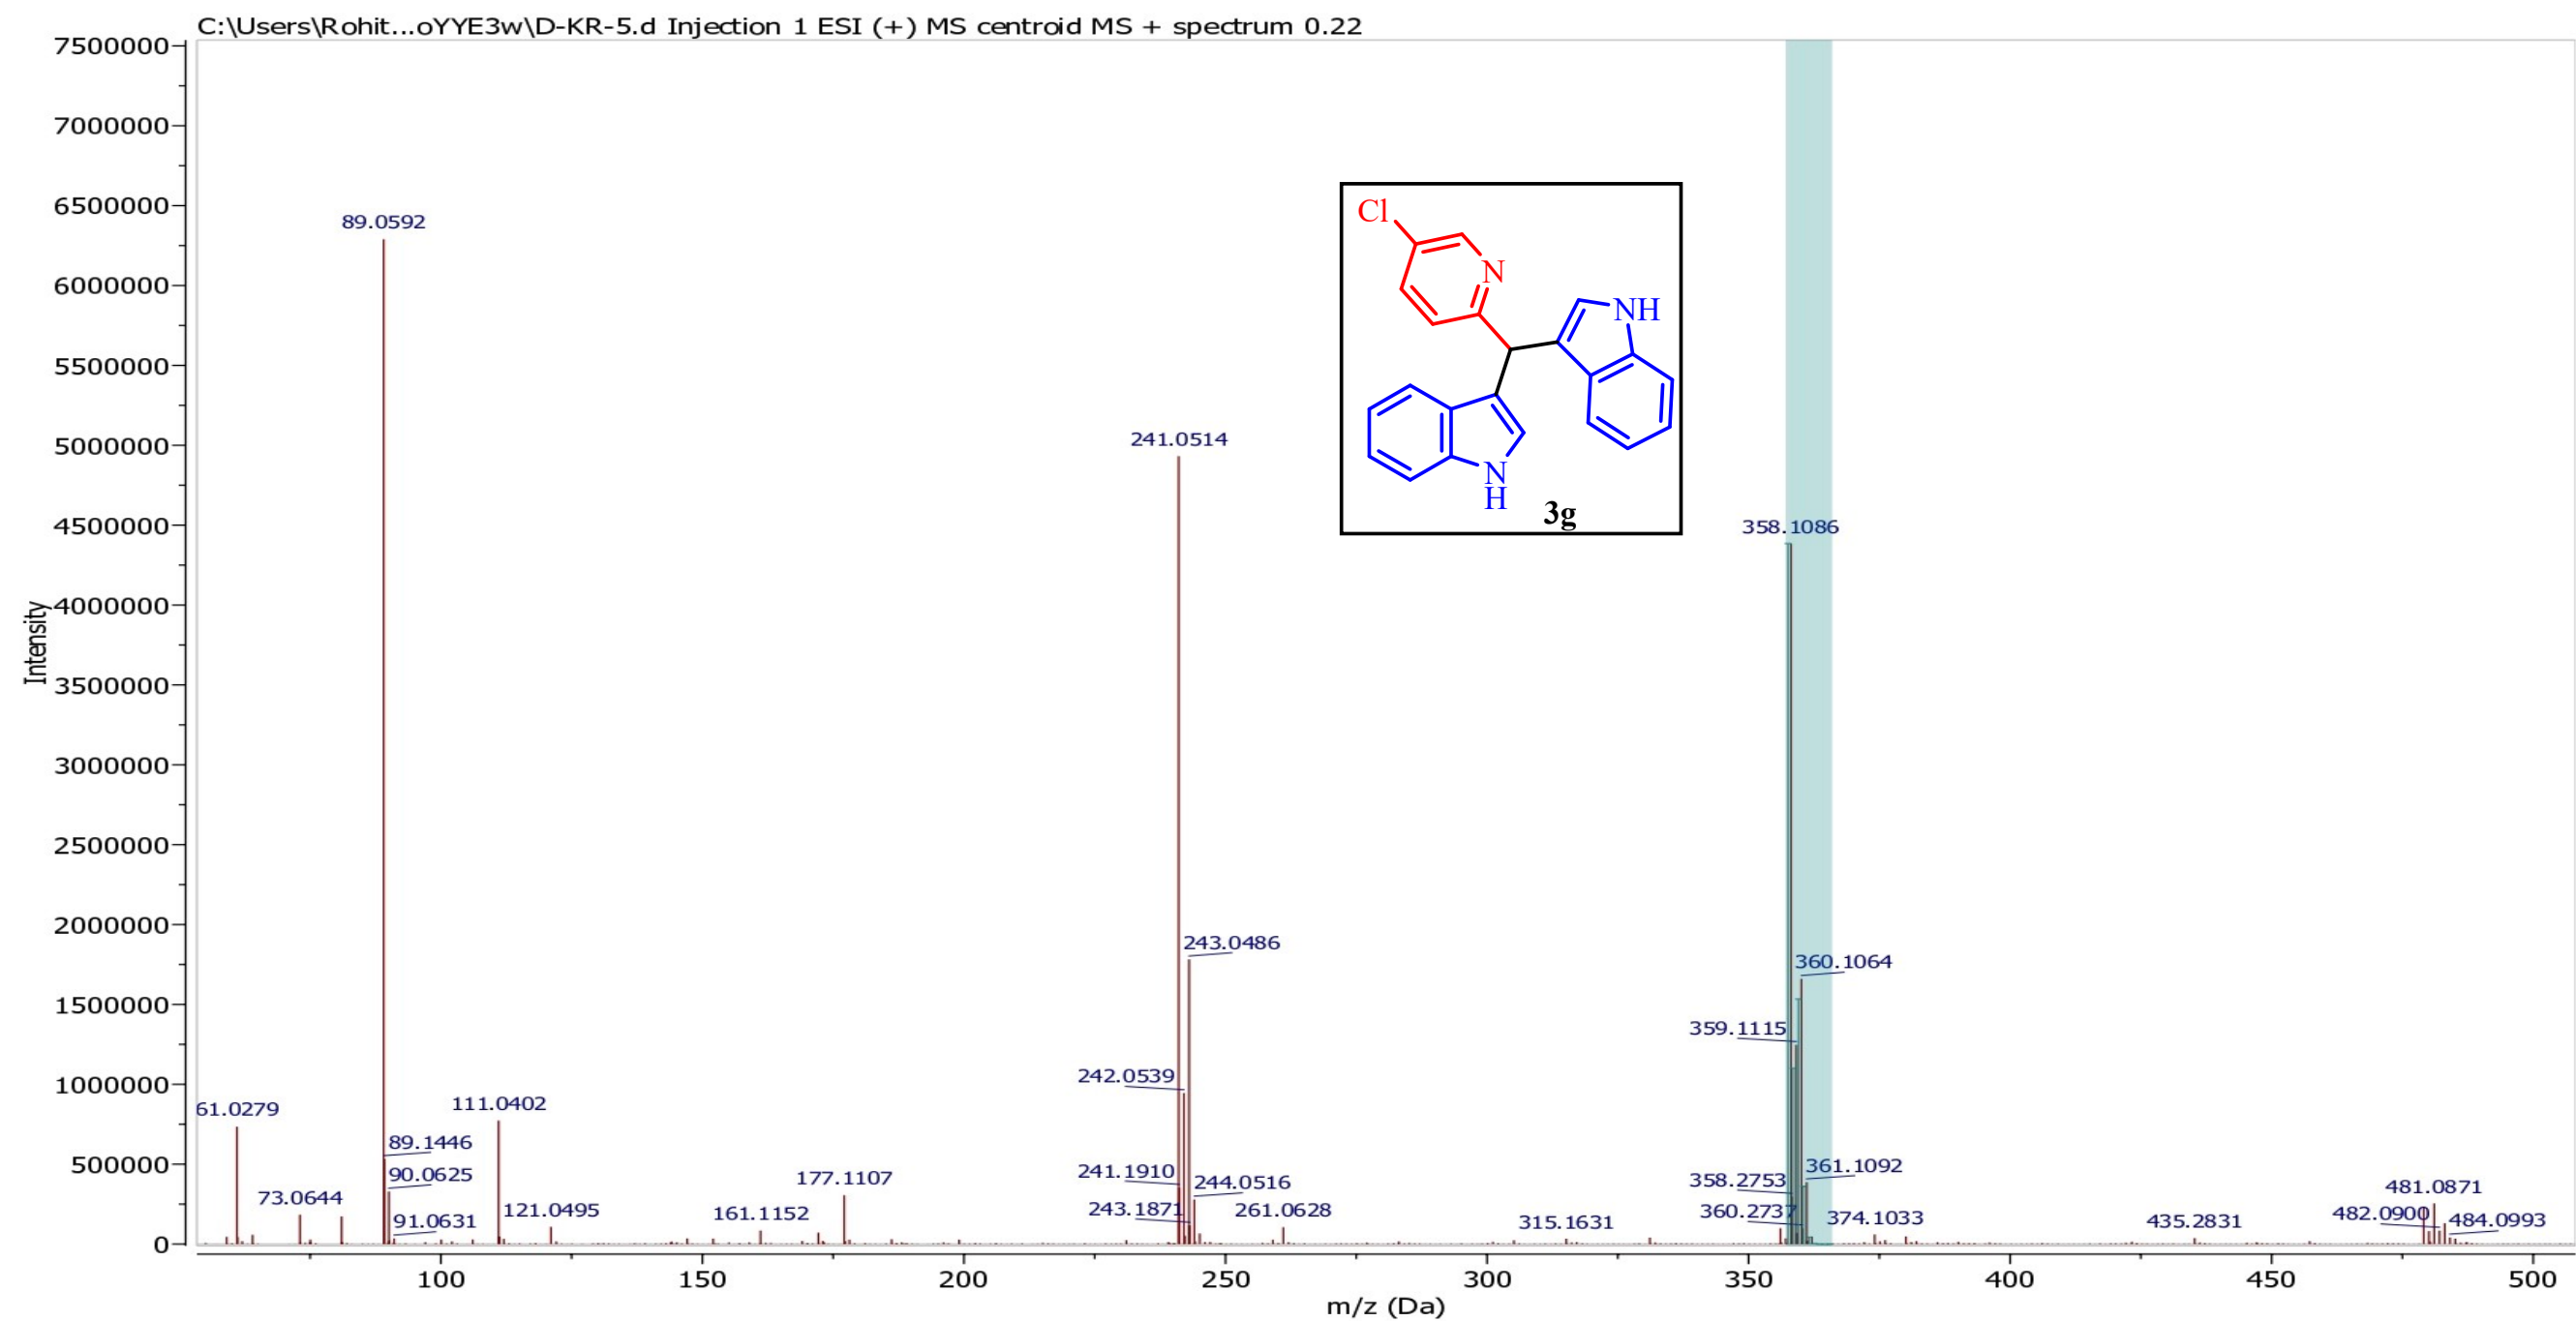

Figure 21. HRMS spectrum of compound **3g**



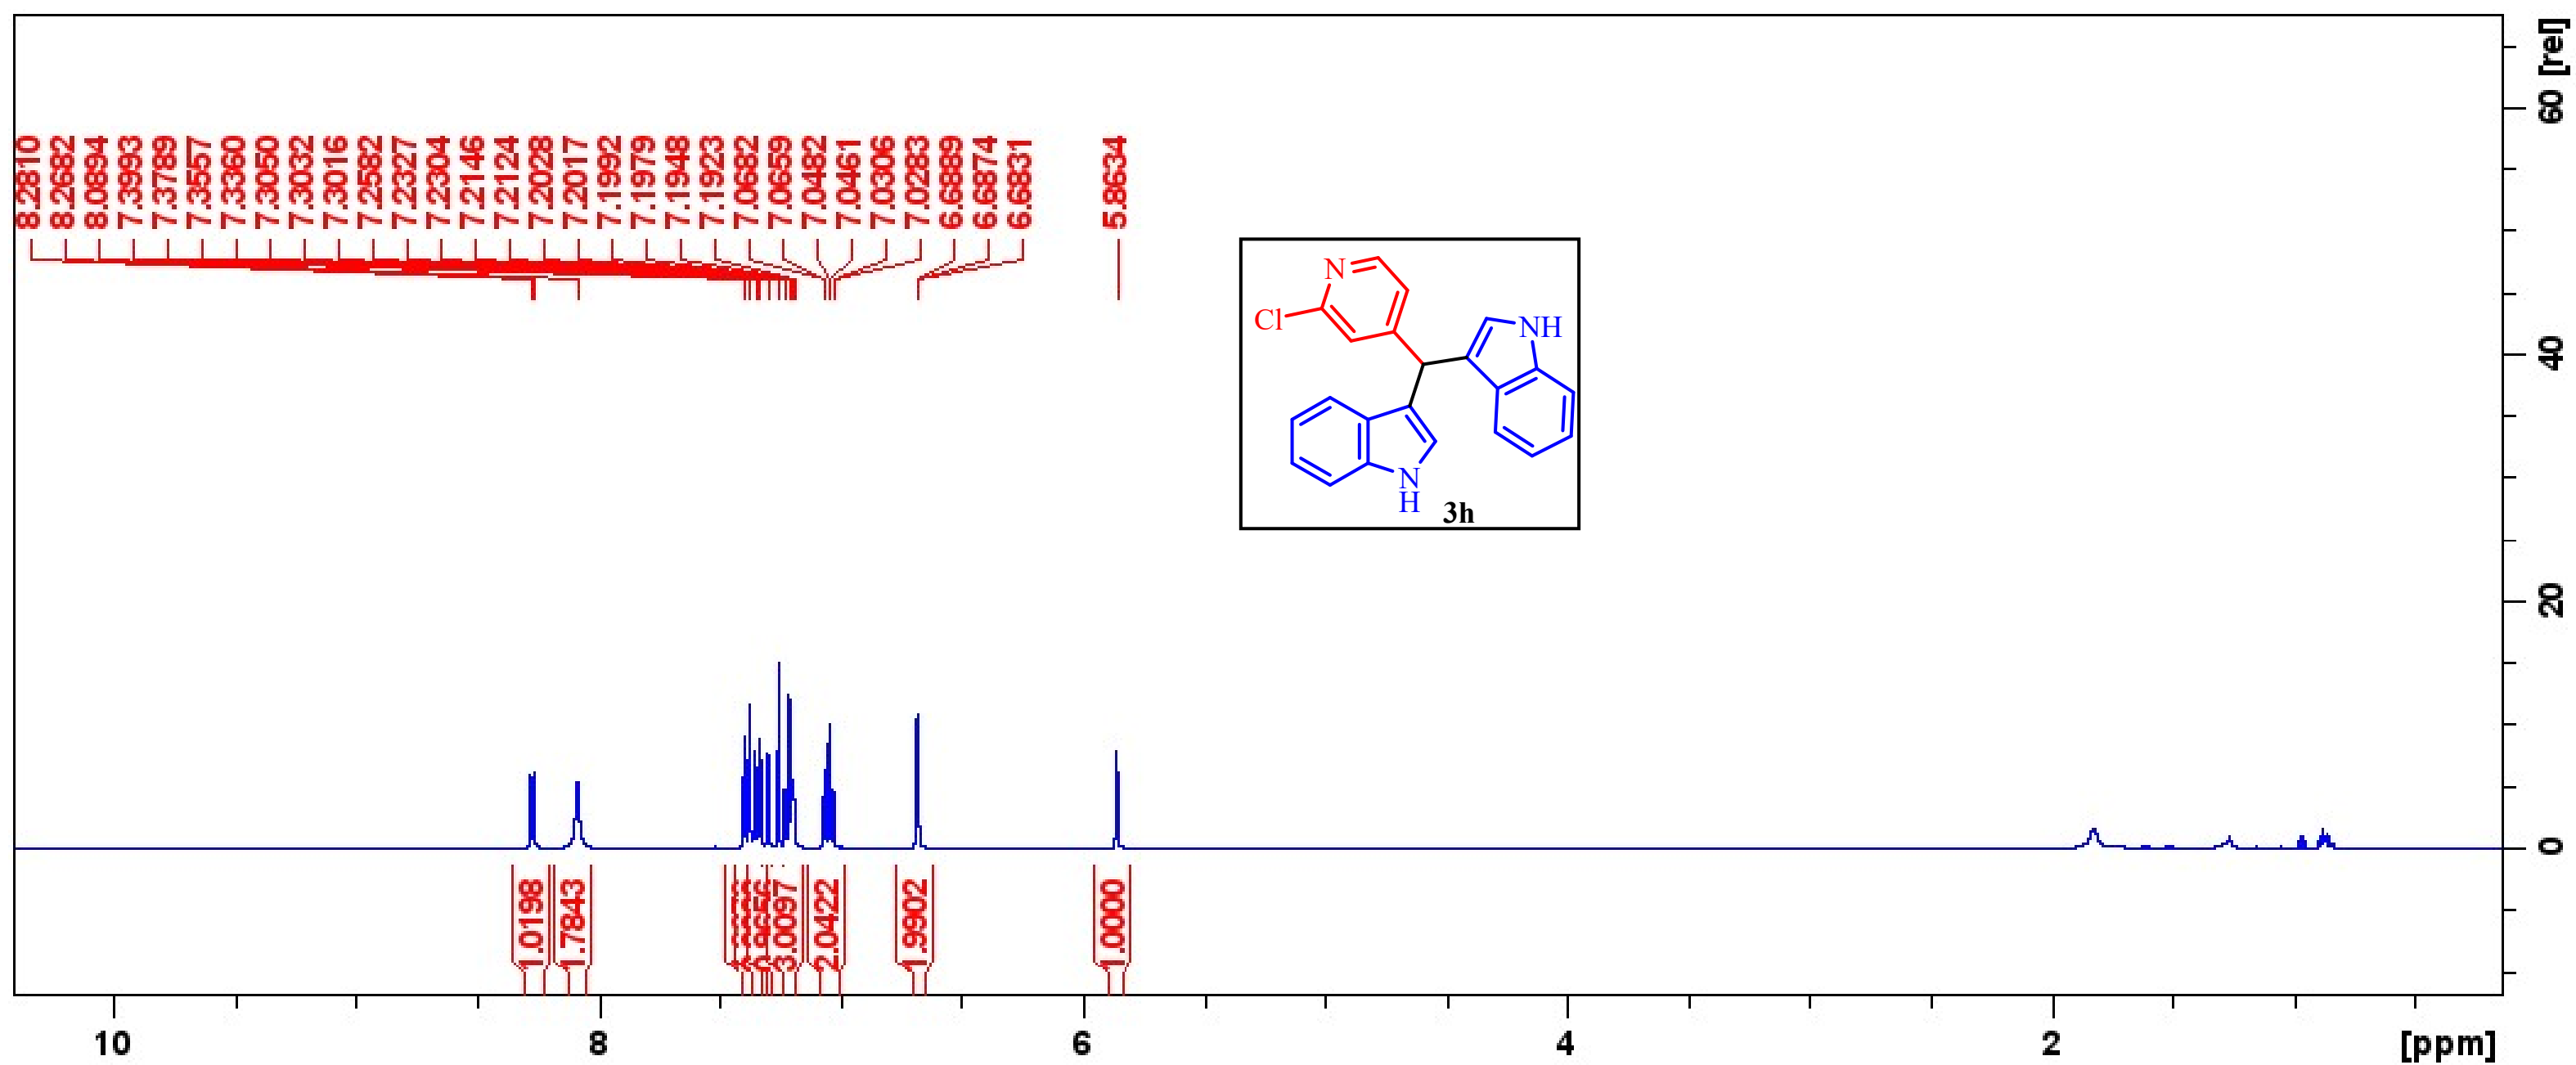

Figure 22. <sup>1</sup>H NMR spectrum of compound **3h**

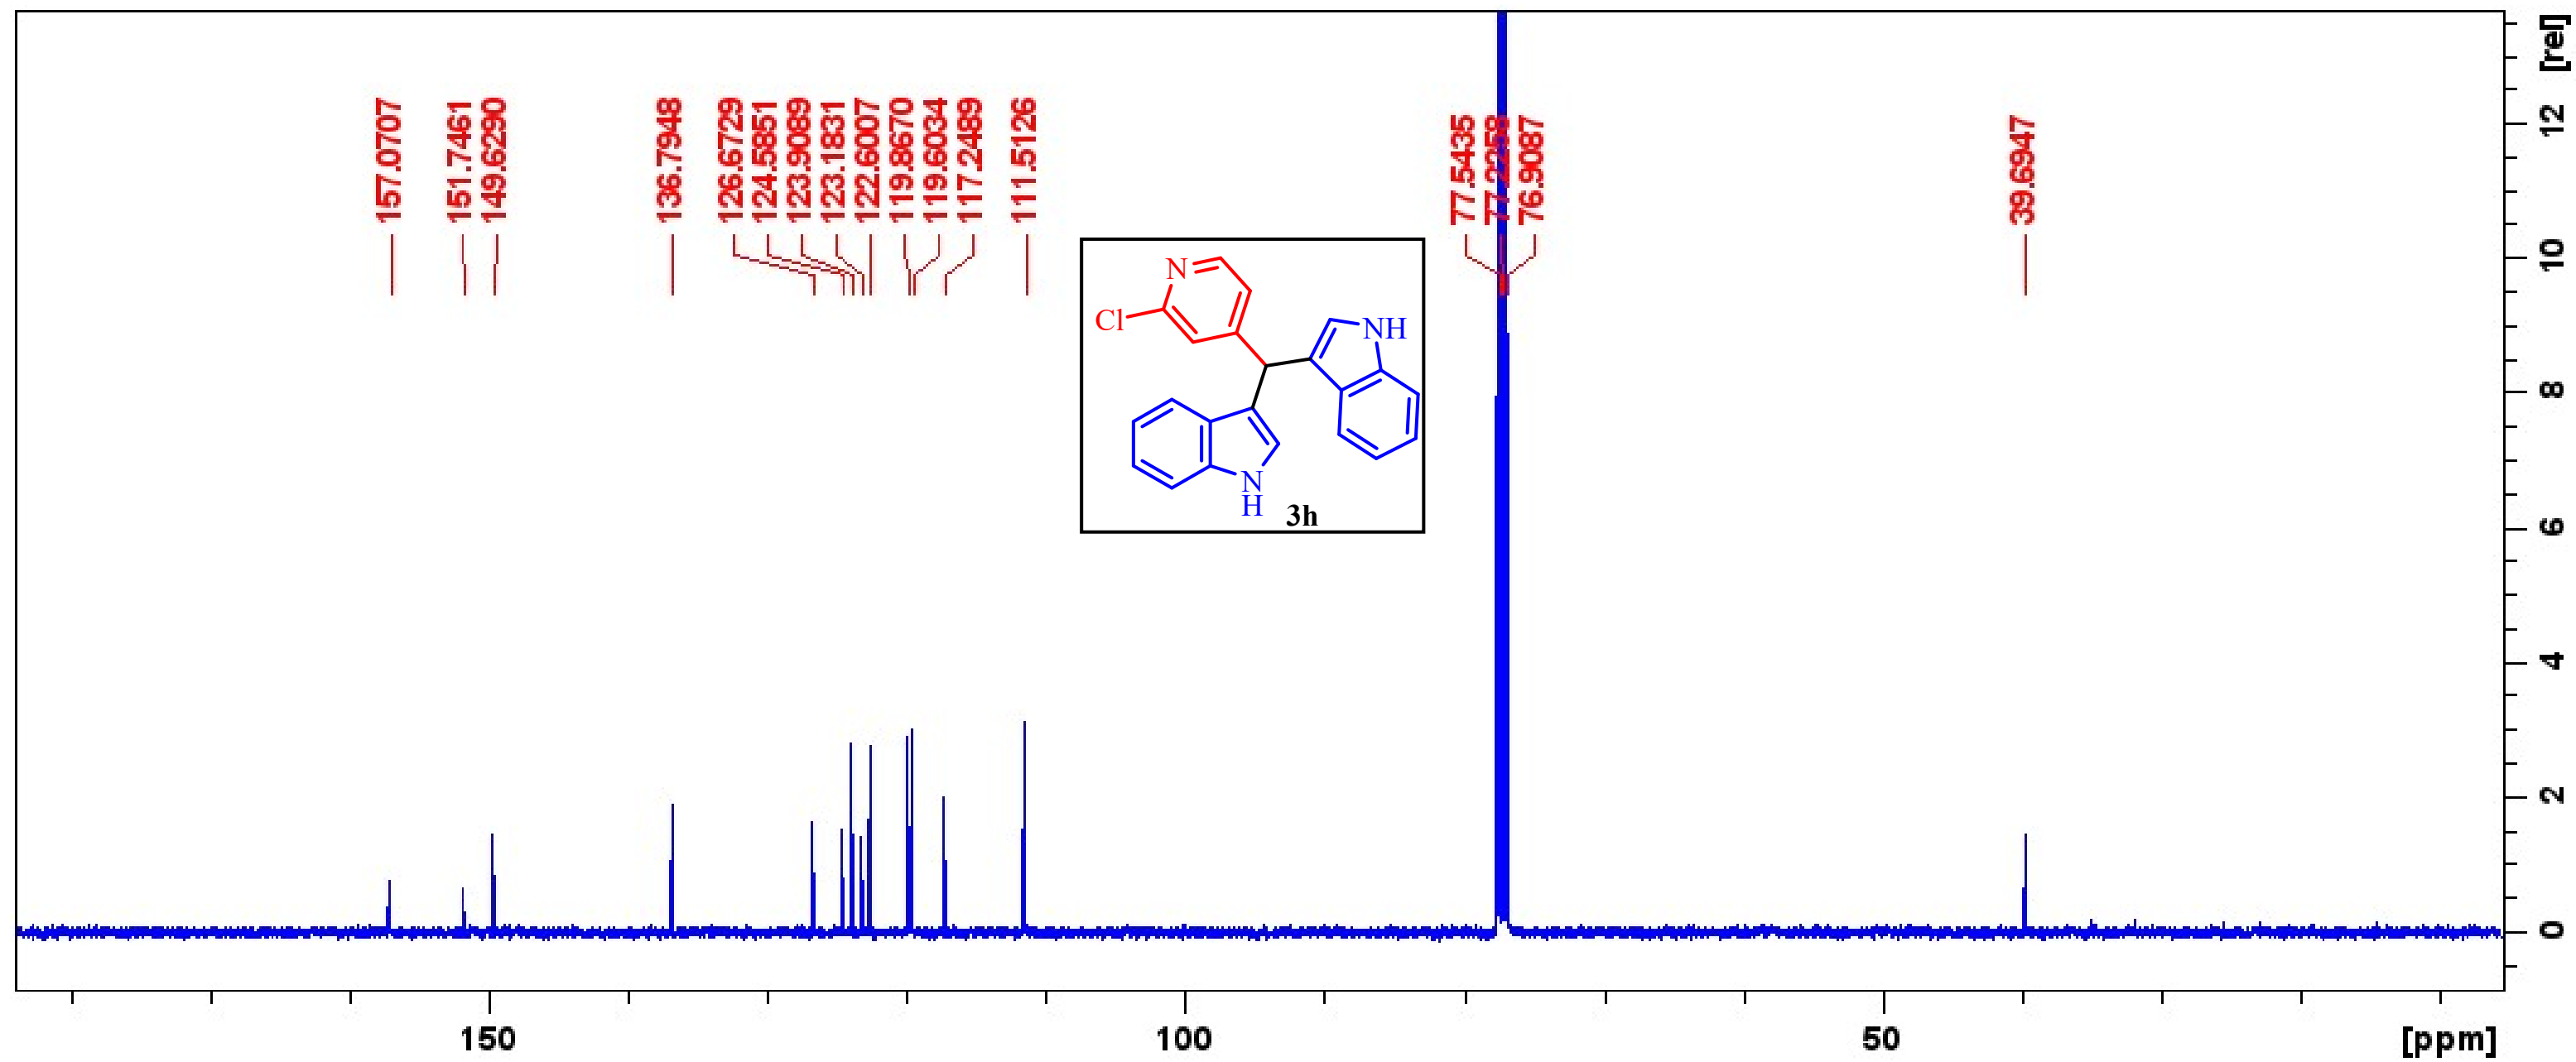

Figure 23.  $^{13}\text{C}$  NMR spectrum of compound **3h**

### Single Mass Analysis

Tolerance = 100.0 mDa / DBE: min = -1.5, max = 50.0

Element prediction: Off

Number of isotope peaks used for i-FIT = 3

Monoisotopic Mass, Even Electron Ions

356 formula(e) evaluated with 73 results within limits (all results (up to 1000) for each mass)

Elements Used:

| Mass     | Calc. Mass | mDa  | PPM  | DBE  | Formula        | i-FIT | i-FIT Norm | Fit Conf % | C  | H  | N  | Cl |
|----------|------------|------|------|------|----------------|-------|------------|------------|----|----|----|----|
| 358.1110 | 358.1111   | -0.1 | -0.3 | 15.5 | C22 H17 N3 Cl  | 553.4 | 6.182      | 0.21       | 22 | 17 | 3  | 1  |
| 358.1093 |            | 1.7  | 4.7  | 20.5 | C23 H12 N5     | 564.7 | 17.494     | 0.00       | 23 | 12 | 5  |    |
| 358.1129 |            | -1.9 | -5.3 | 10.5 | C21 H22 N Cl2  | 556.7 | 9.497      | 0.01       | 21 | 22 | 1  | 2  |
| 358.1081 |            | 2.9  | 8.1  | 2.5  | C11 H23 N7 Cl3 | 555.7 | 8.535      | 0.02       | 11 | 23 | 7  | 3  |
| 358.1062 |            | 4.8  | 13.4 | 7.5  | C12 H18 N9 Cl2 | 554.3 | 7.081      | 0.08       | 12 | 18 | 9  | 2  |
| 358.1044 |            | 6.6  | 18.4 | 12.5 | C13 H13 N11 Cl | 548.6 | 1.464      | 23.13      | 13 | 13 | 11 | 1  |
| 358.1026 |            | 8.4  | 23.5 | 17.5 | C14 H8 N13     | 563.6 | 16.472     | 0.00       | 14 | 8  | 13 |    |

31052023\_41\_14257

2Cl4BrCHO\_31052023\_018 381 (3.323) AM2 (Ar,30000.0,556.26,0.00,LS 1)

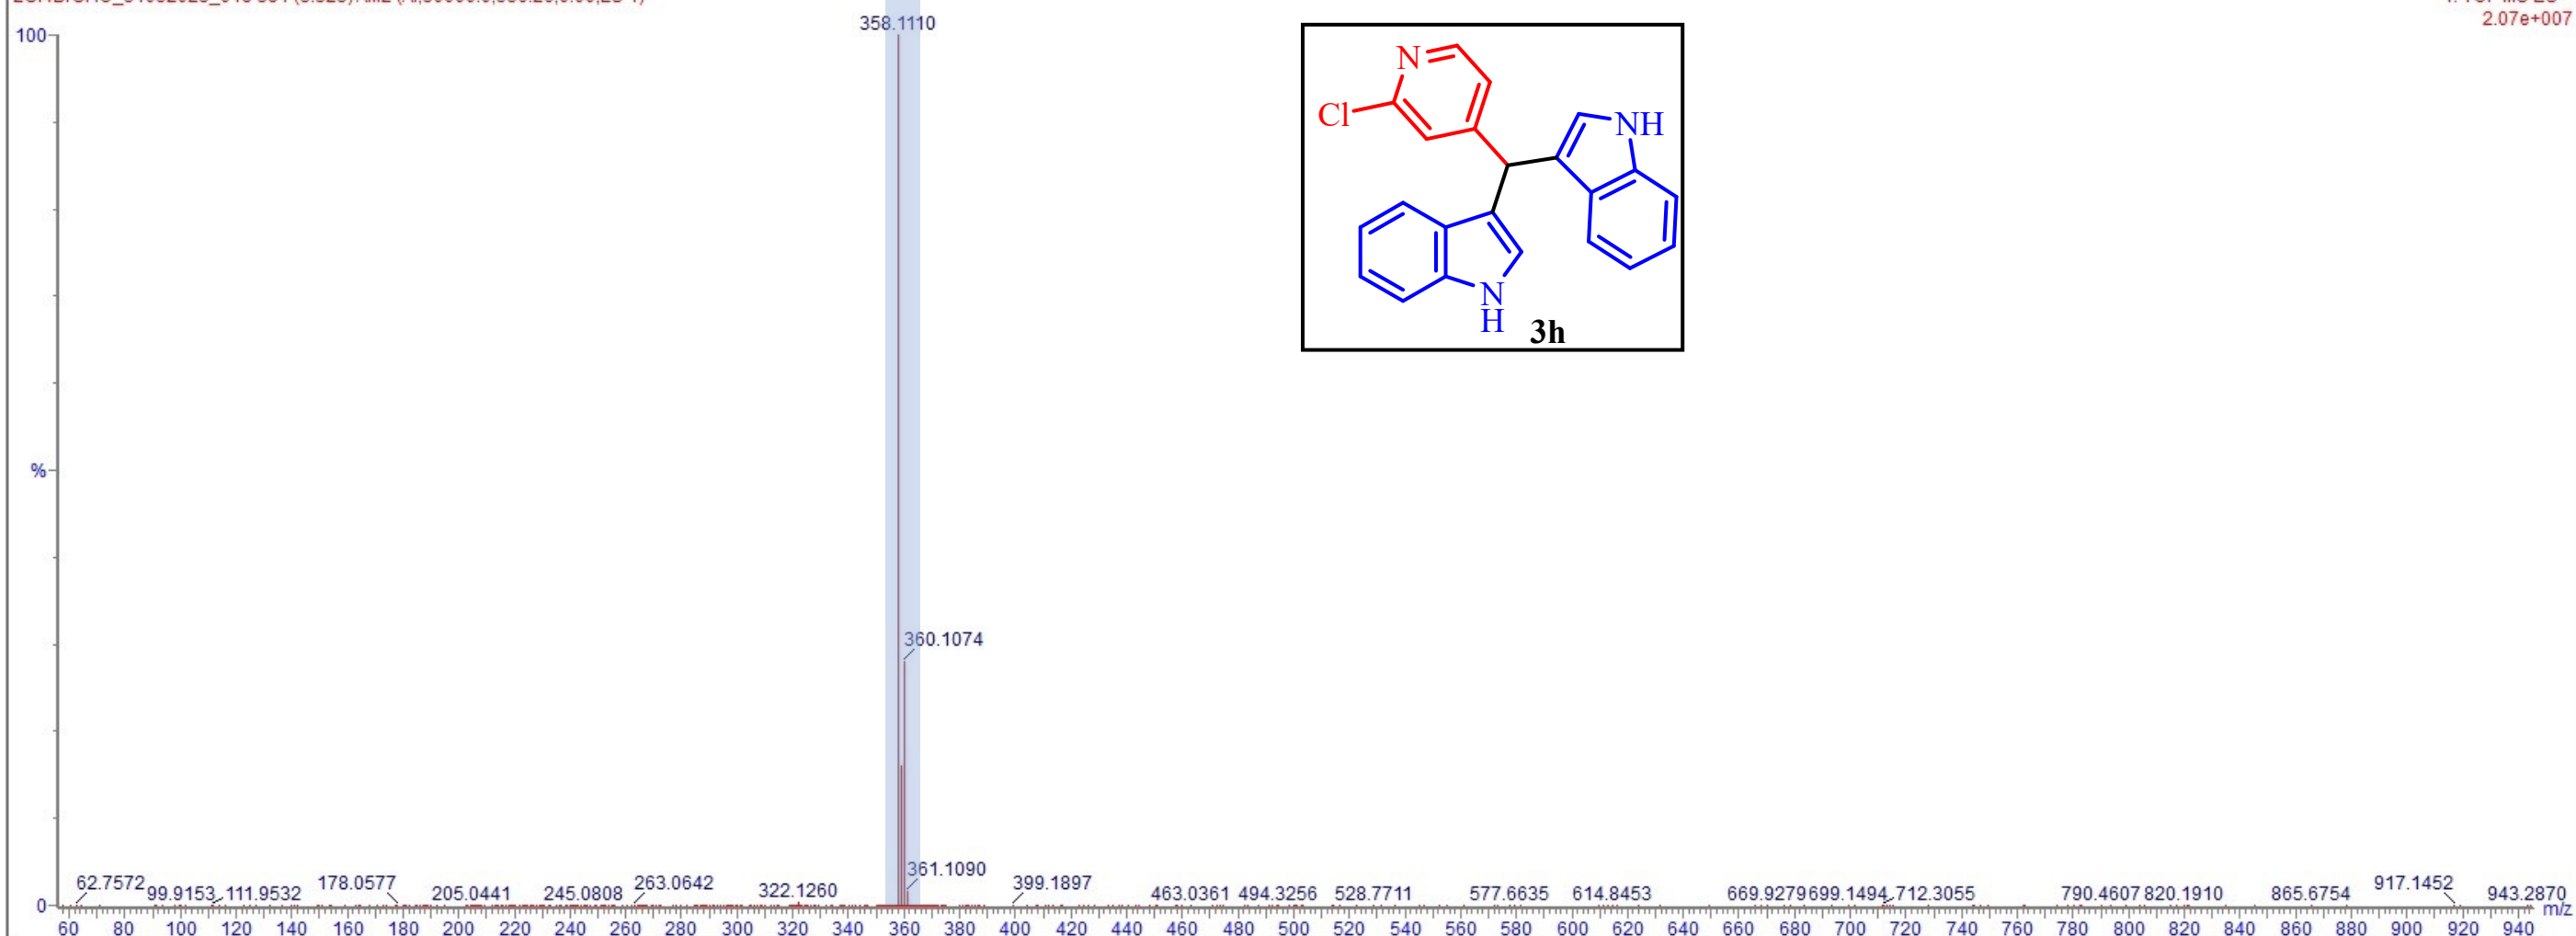

For Help, press F1

Figure 24. HRMS spectrum of compound **3h**

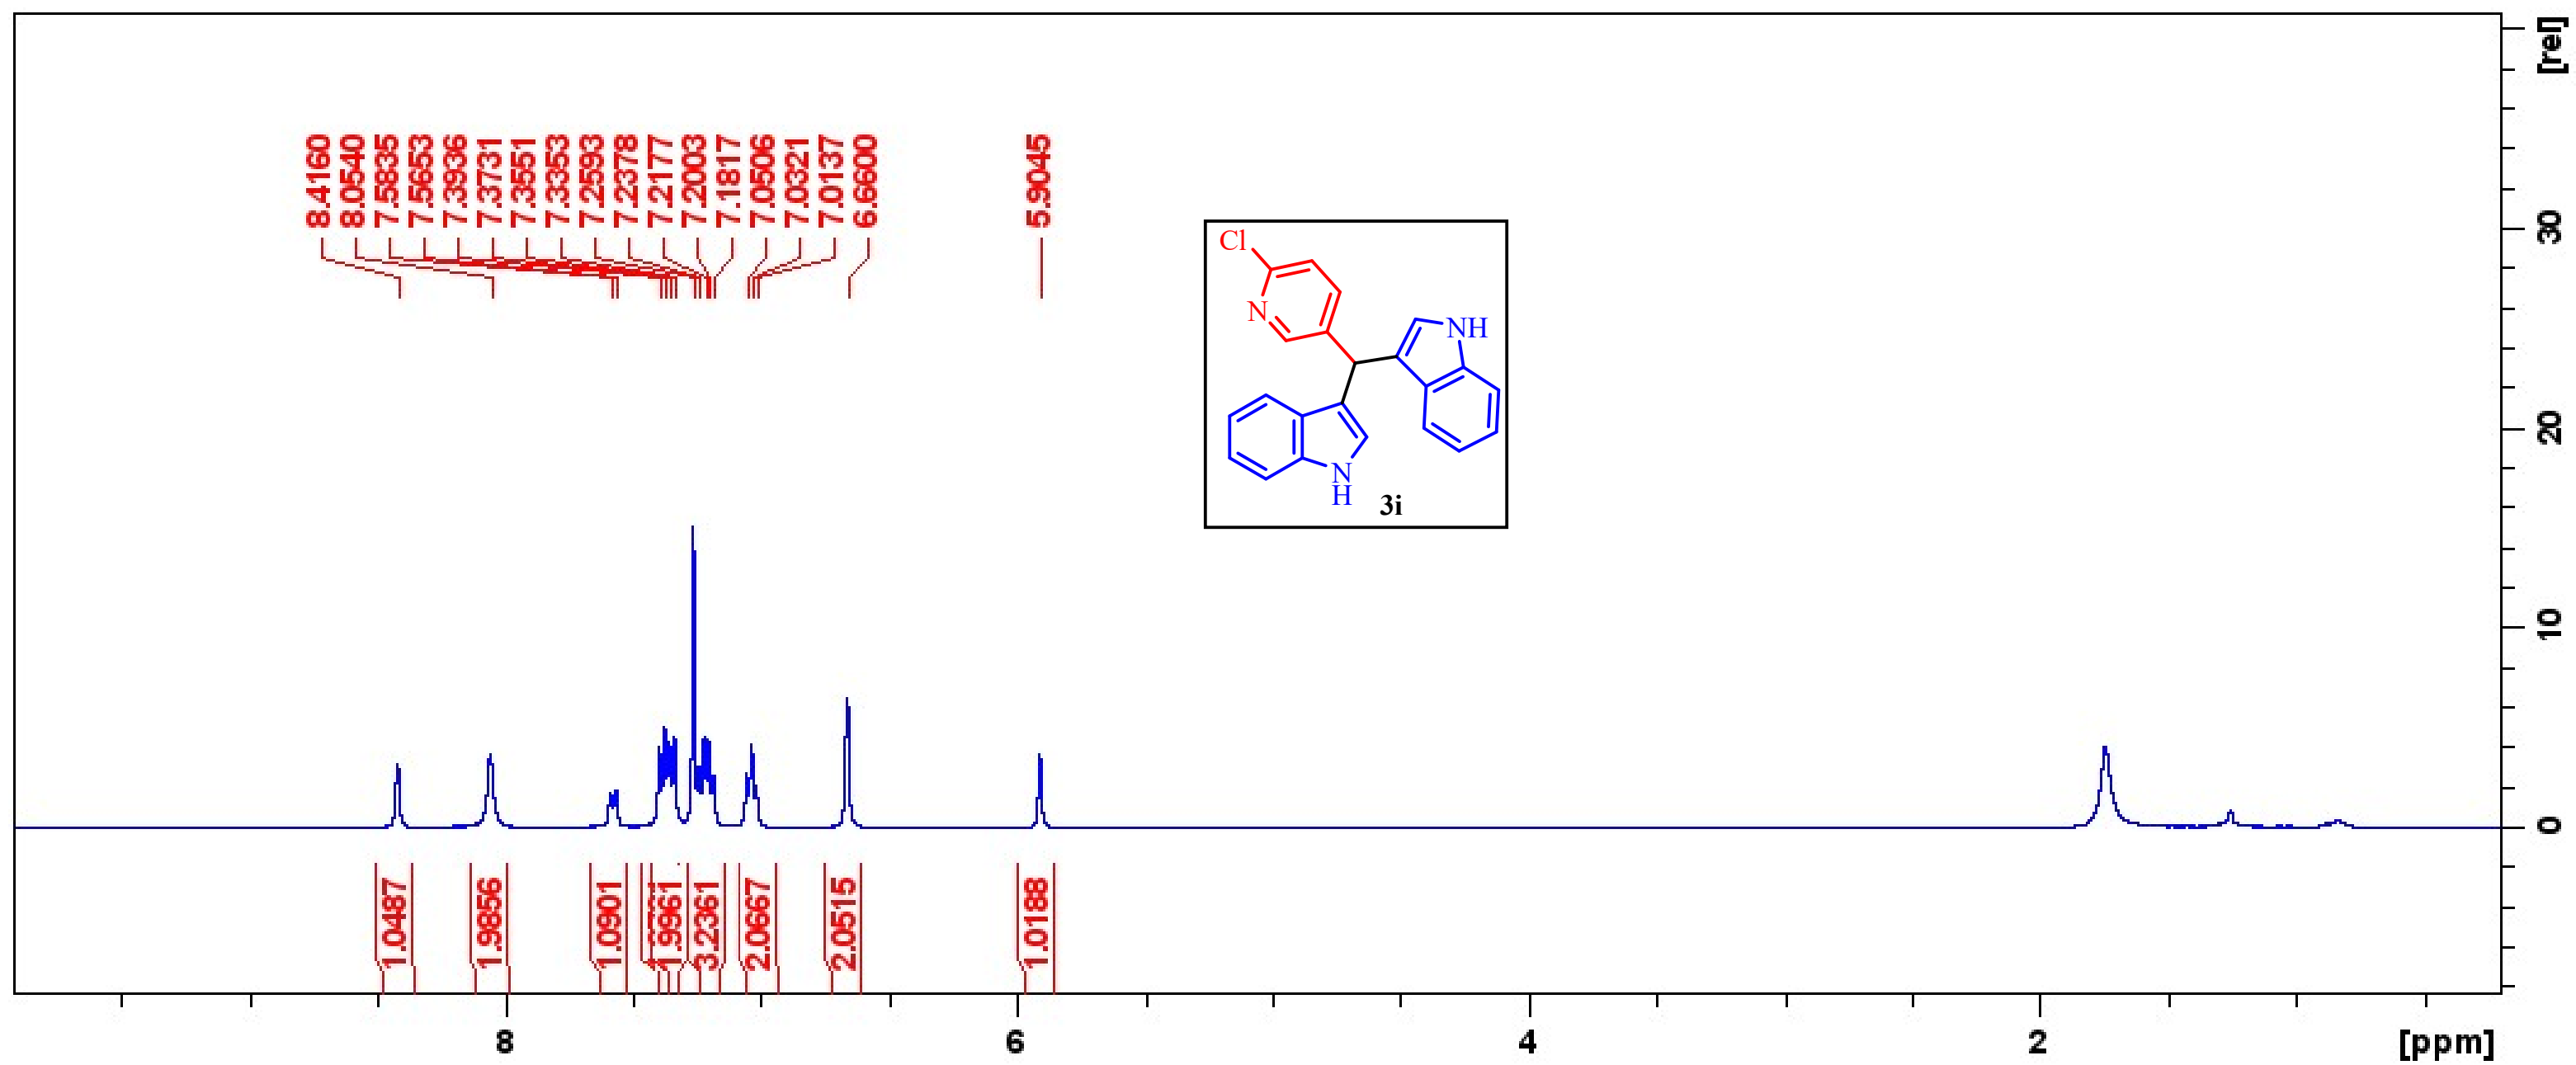

Figure 25. <sup>1</sup>H NMR spectrum of compound **3i**

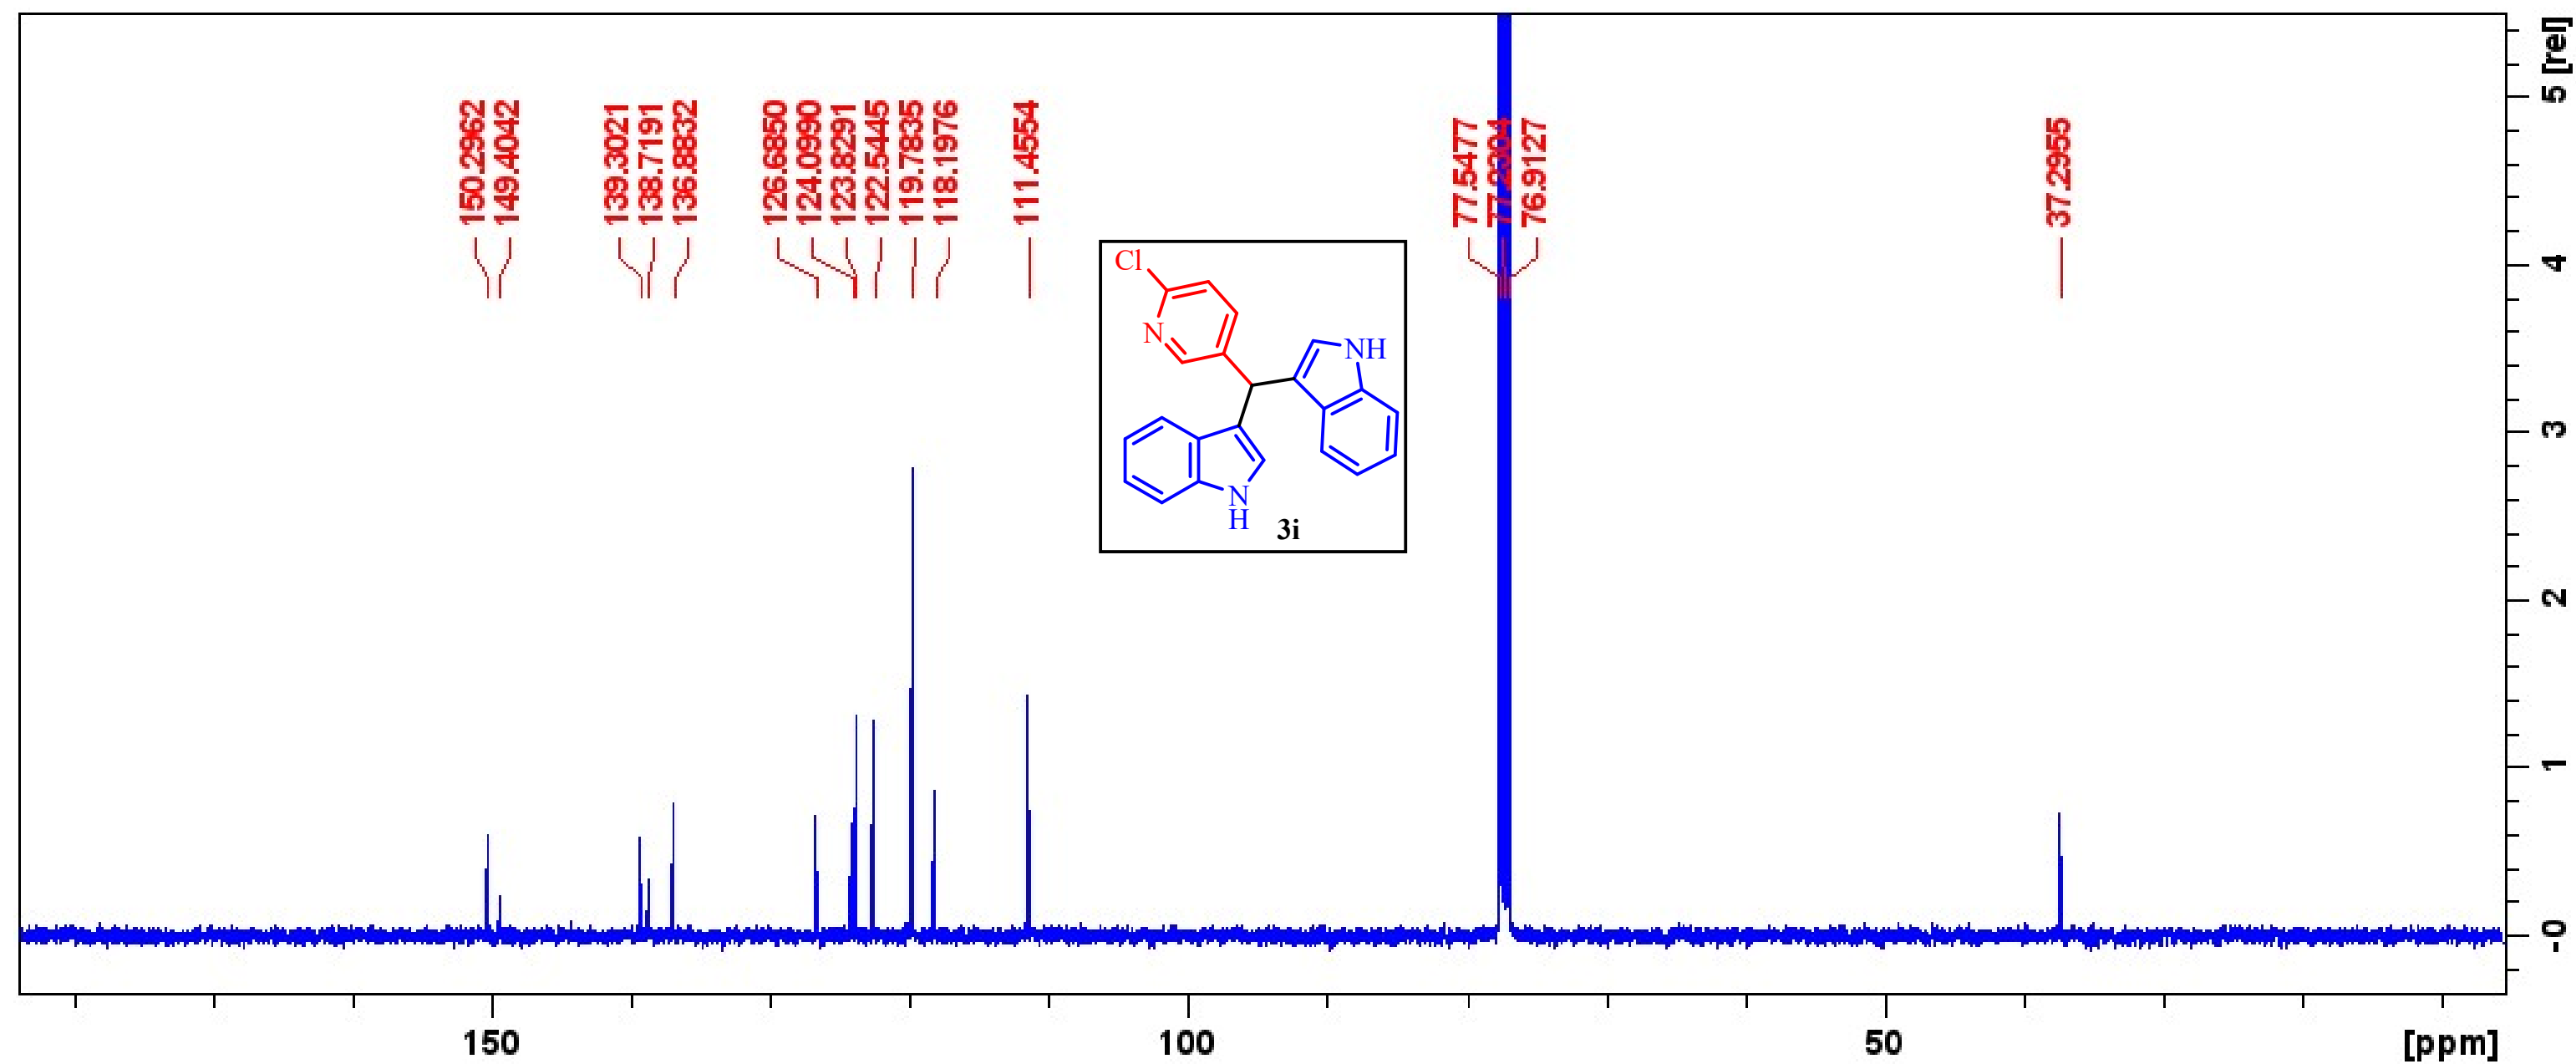

Figure 26.  $^{13}\text{C}$  NMR spectrum of compound **3i**

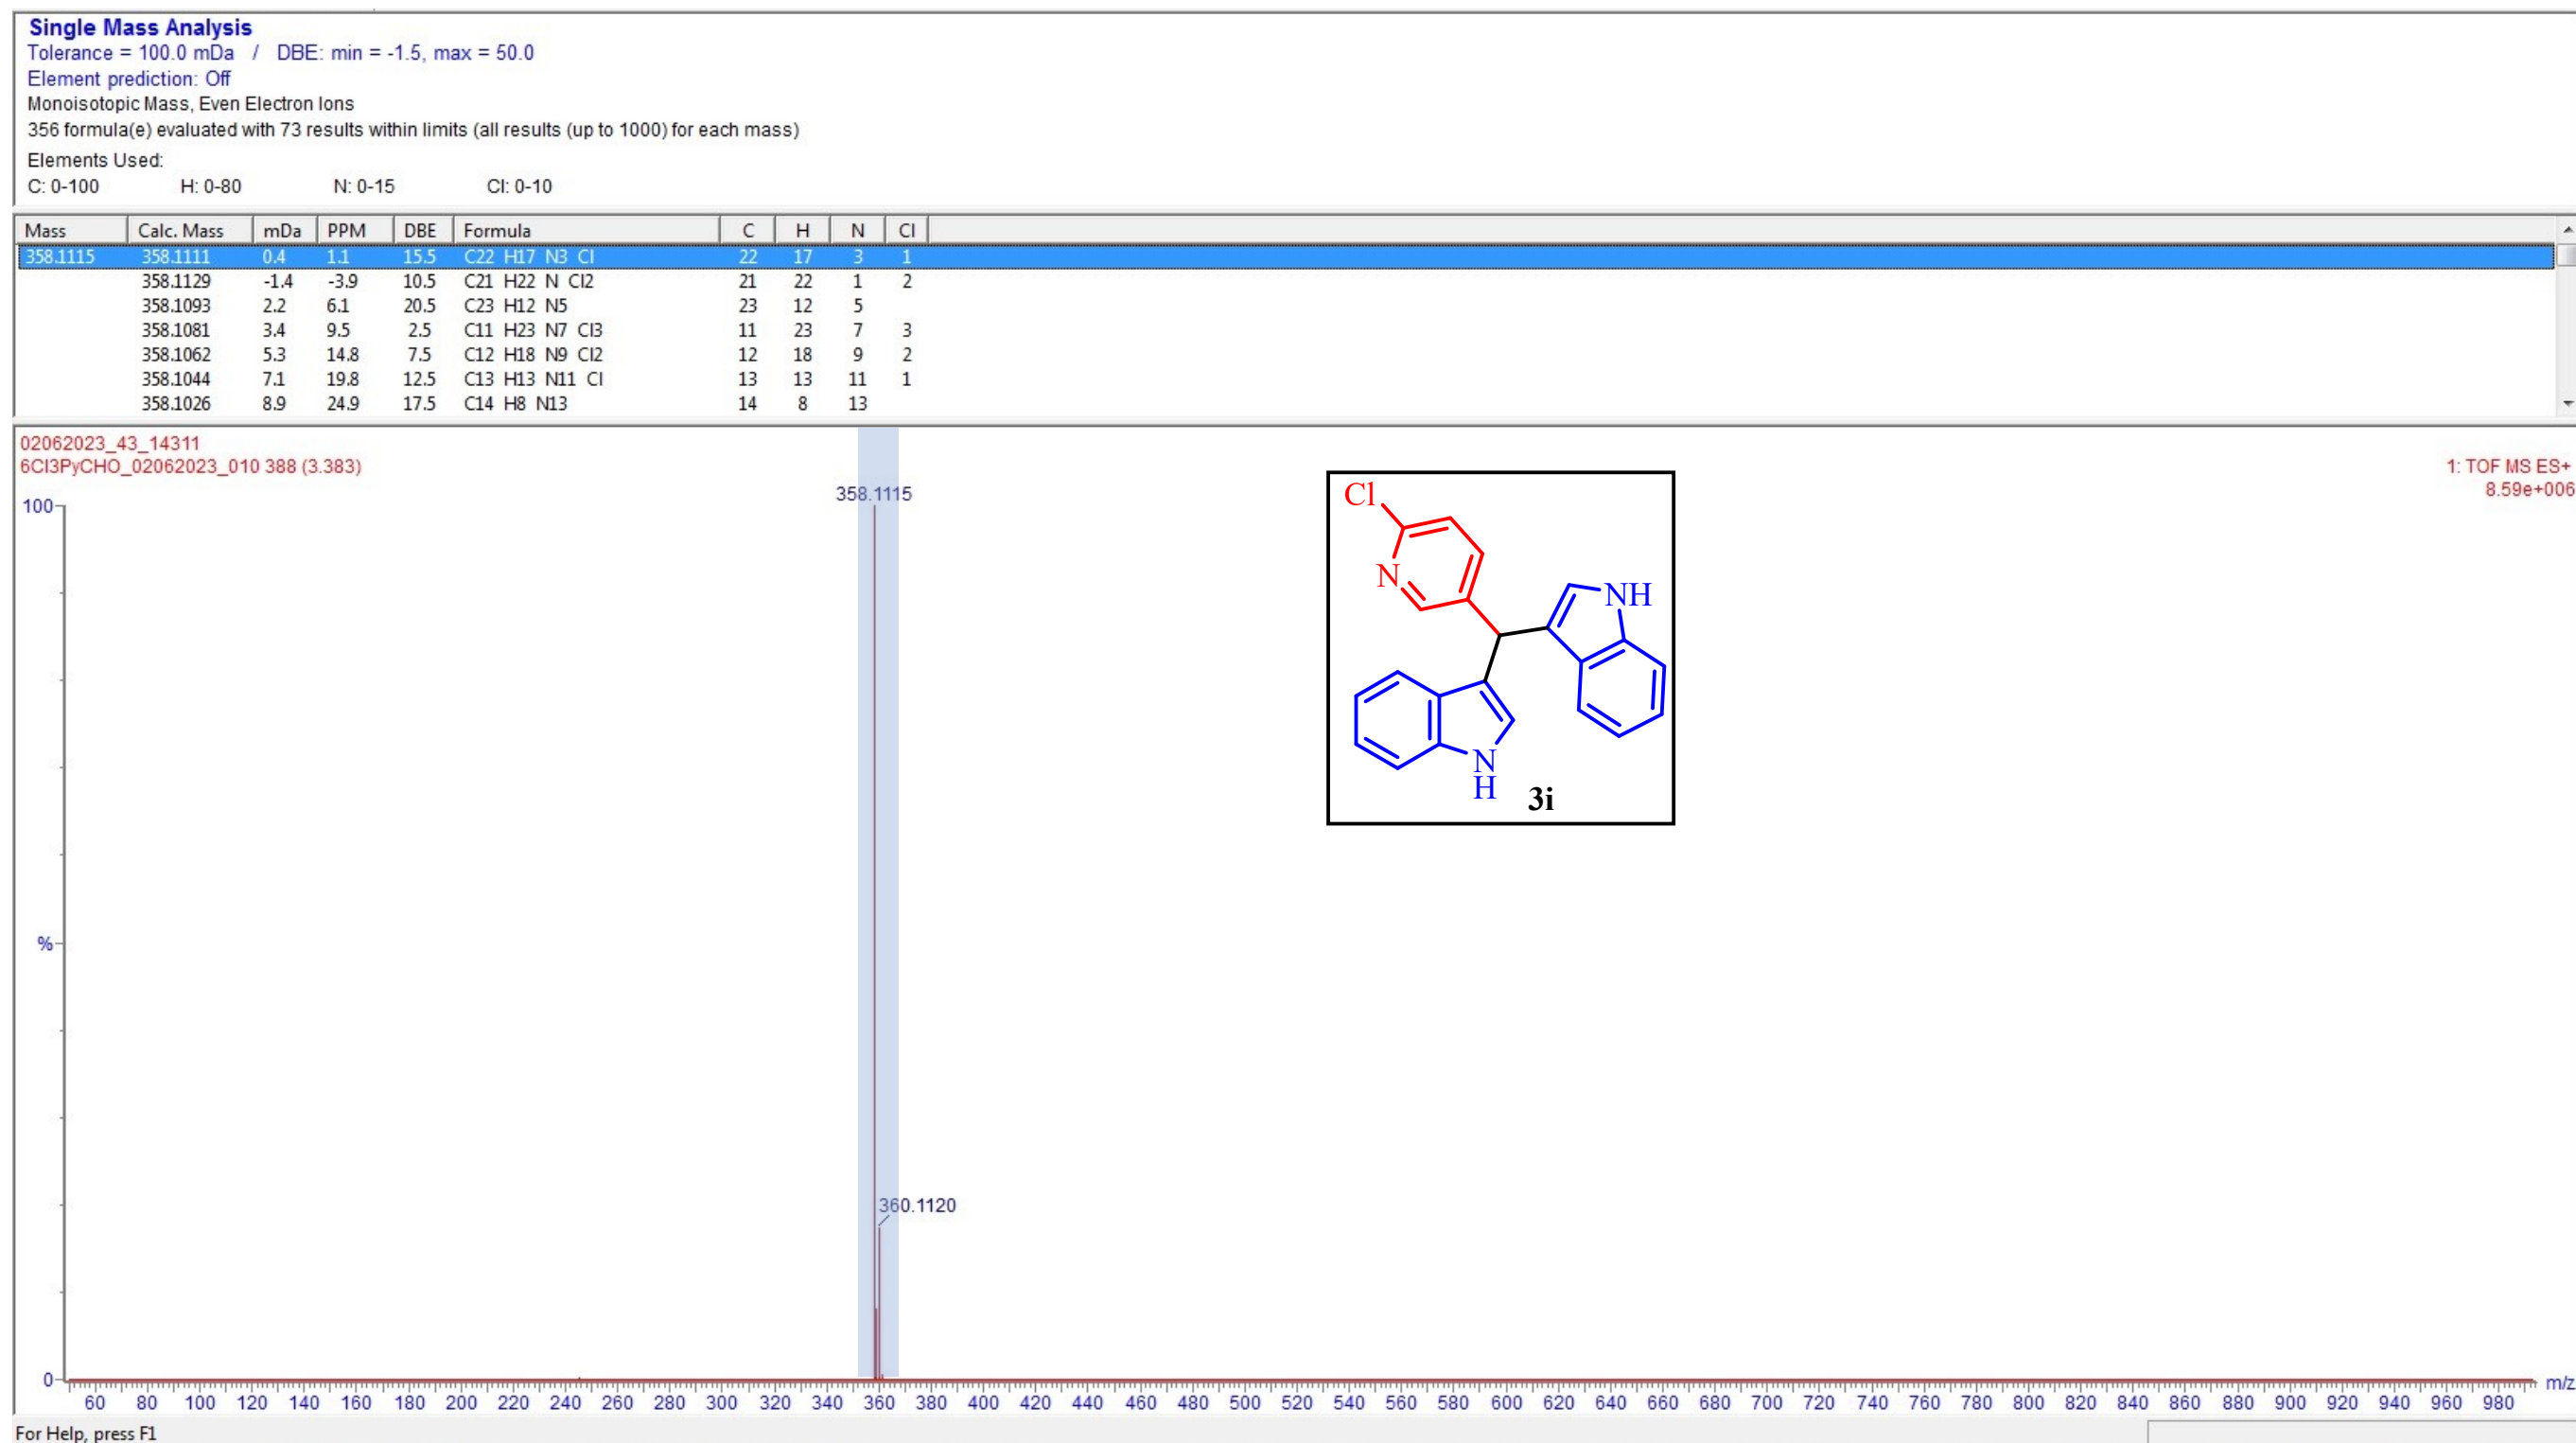

Figure 27. HRMS spectrum of compound **3i**

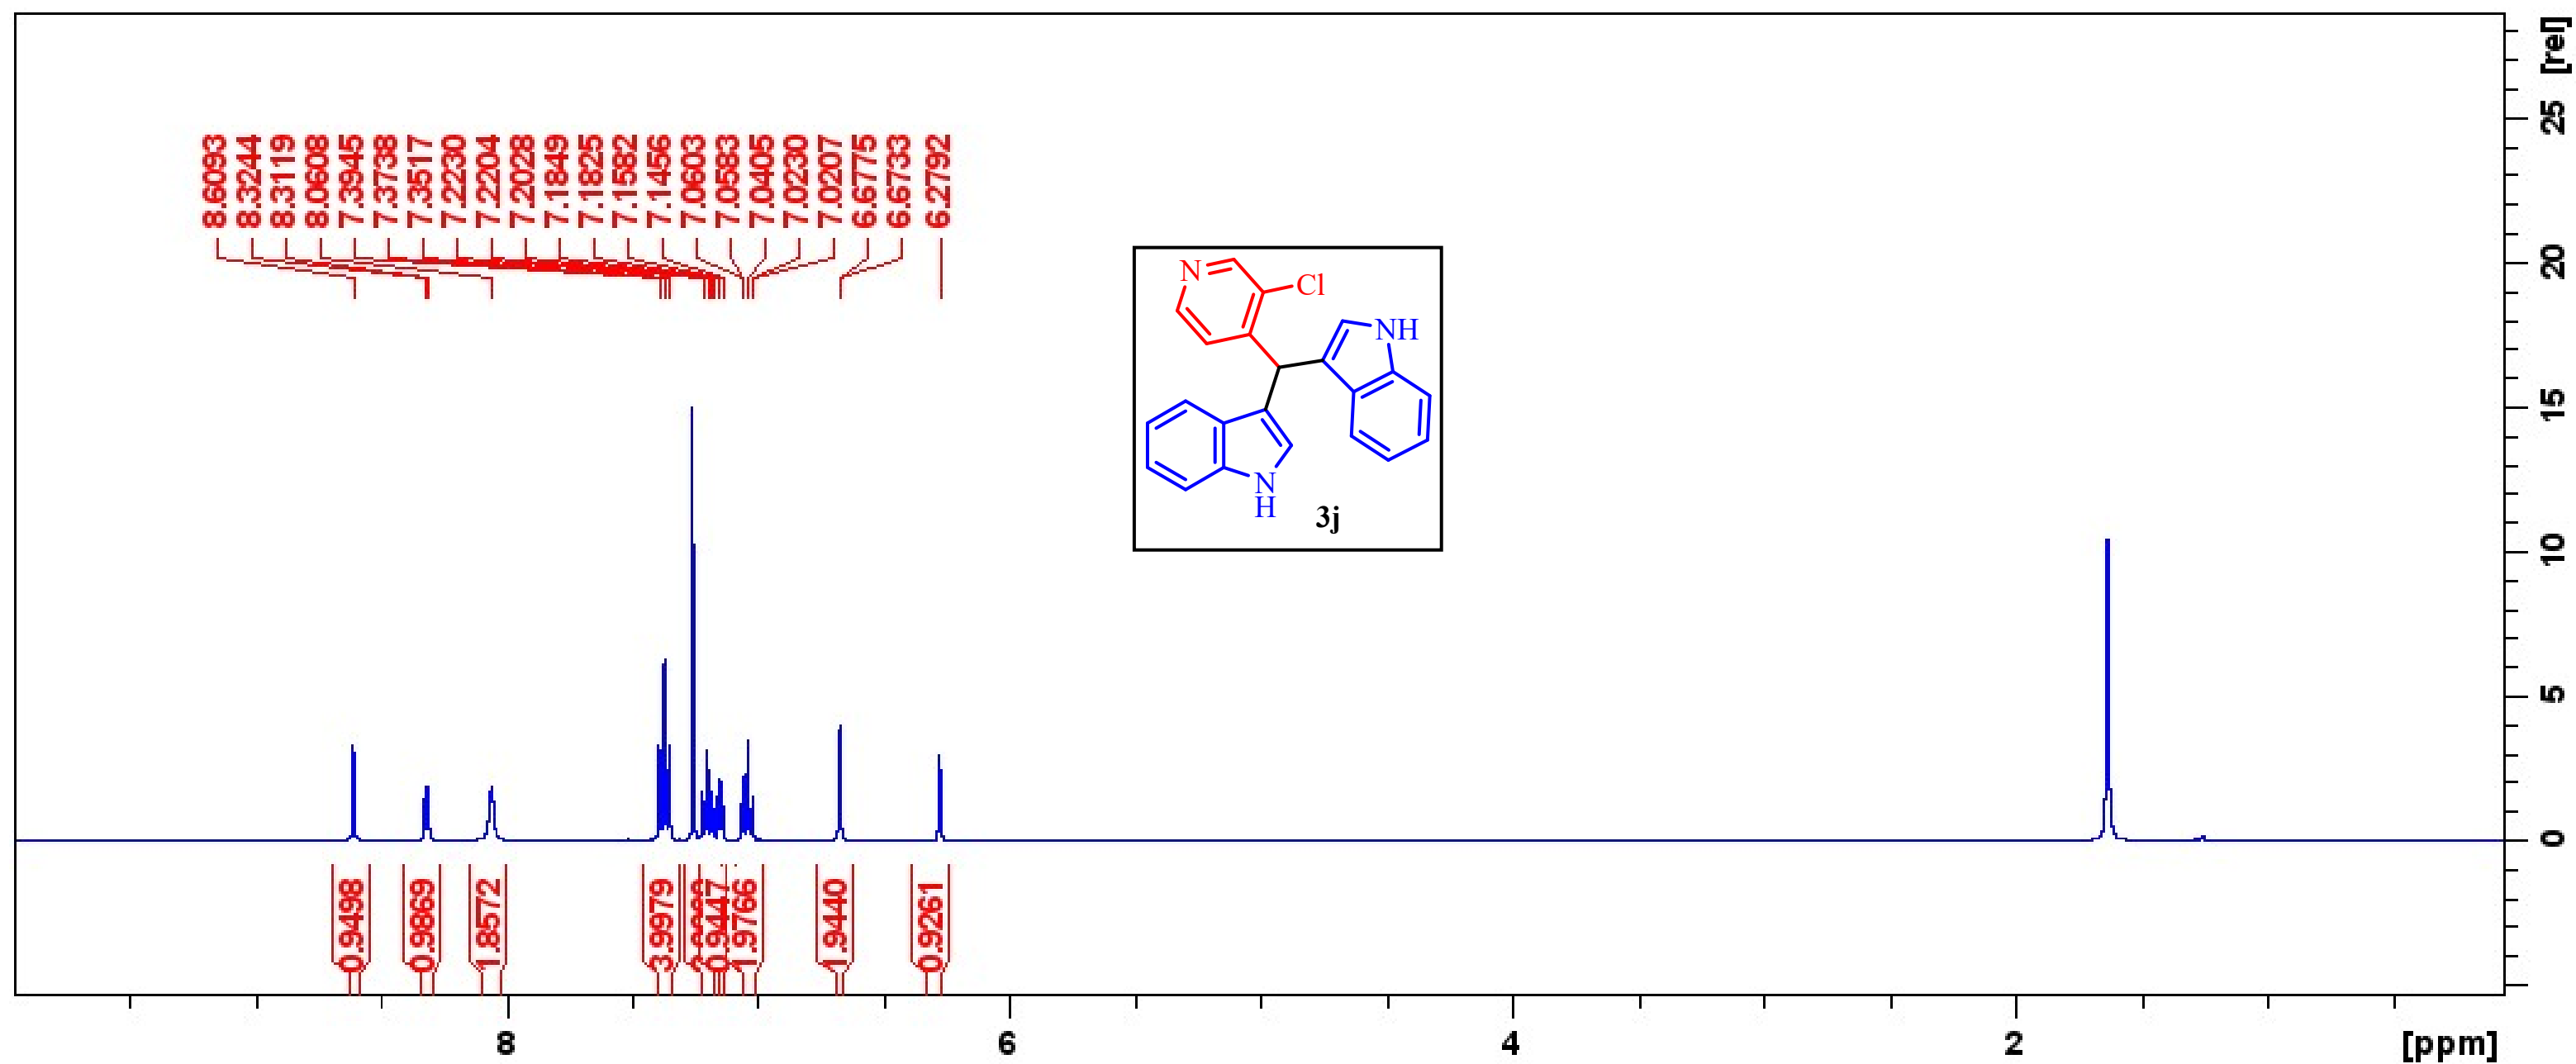

Figure 28. <sup>1</sup>H NMR spectrum of compound **3j**

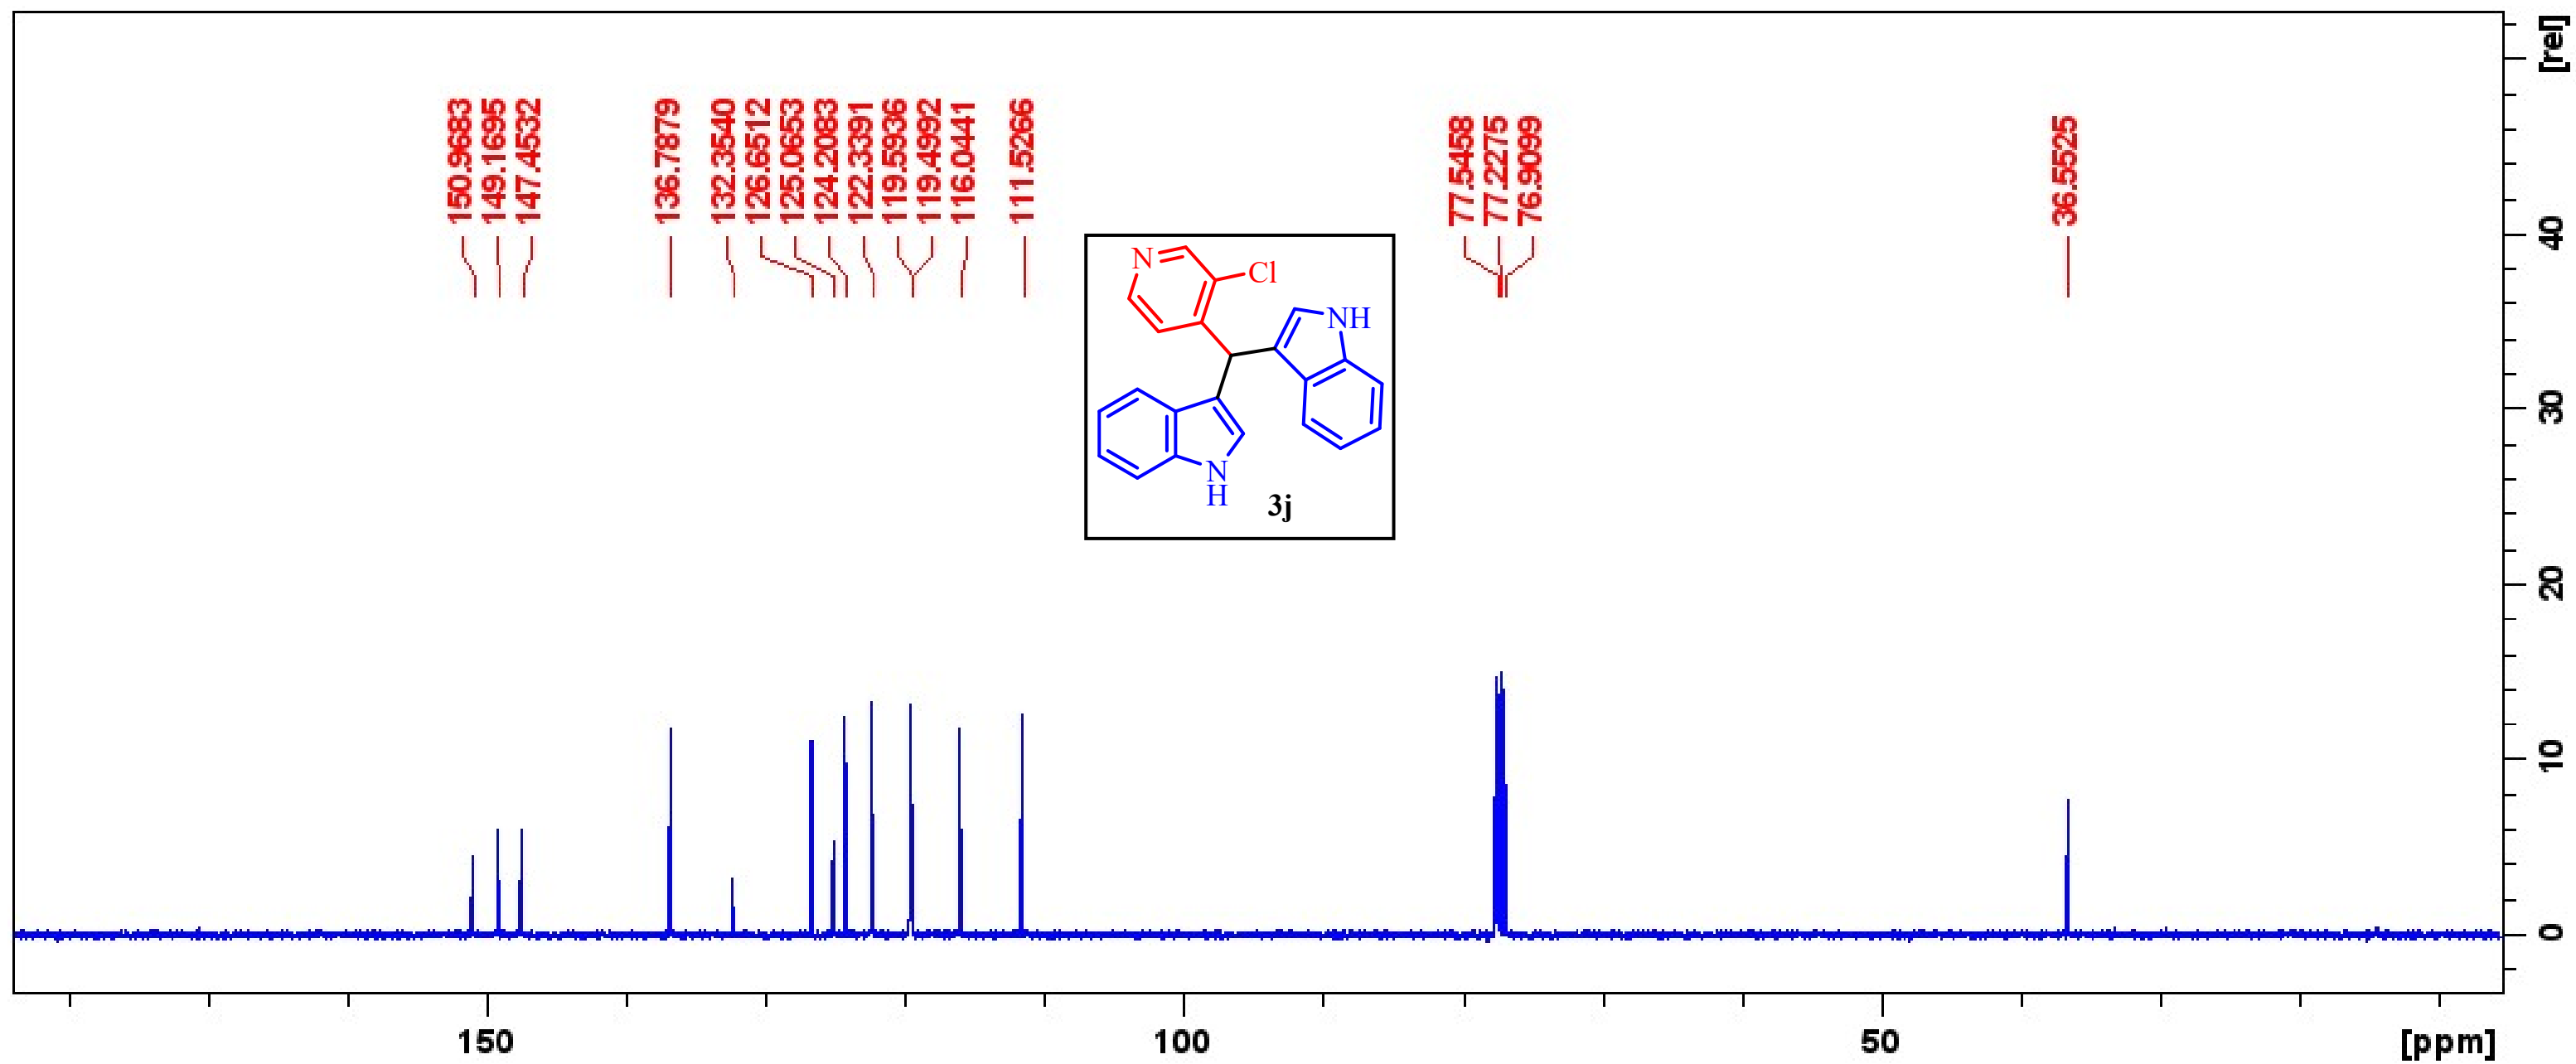

Figure 29. <sup>13</sup>C NMR spectrum of compound **3j**



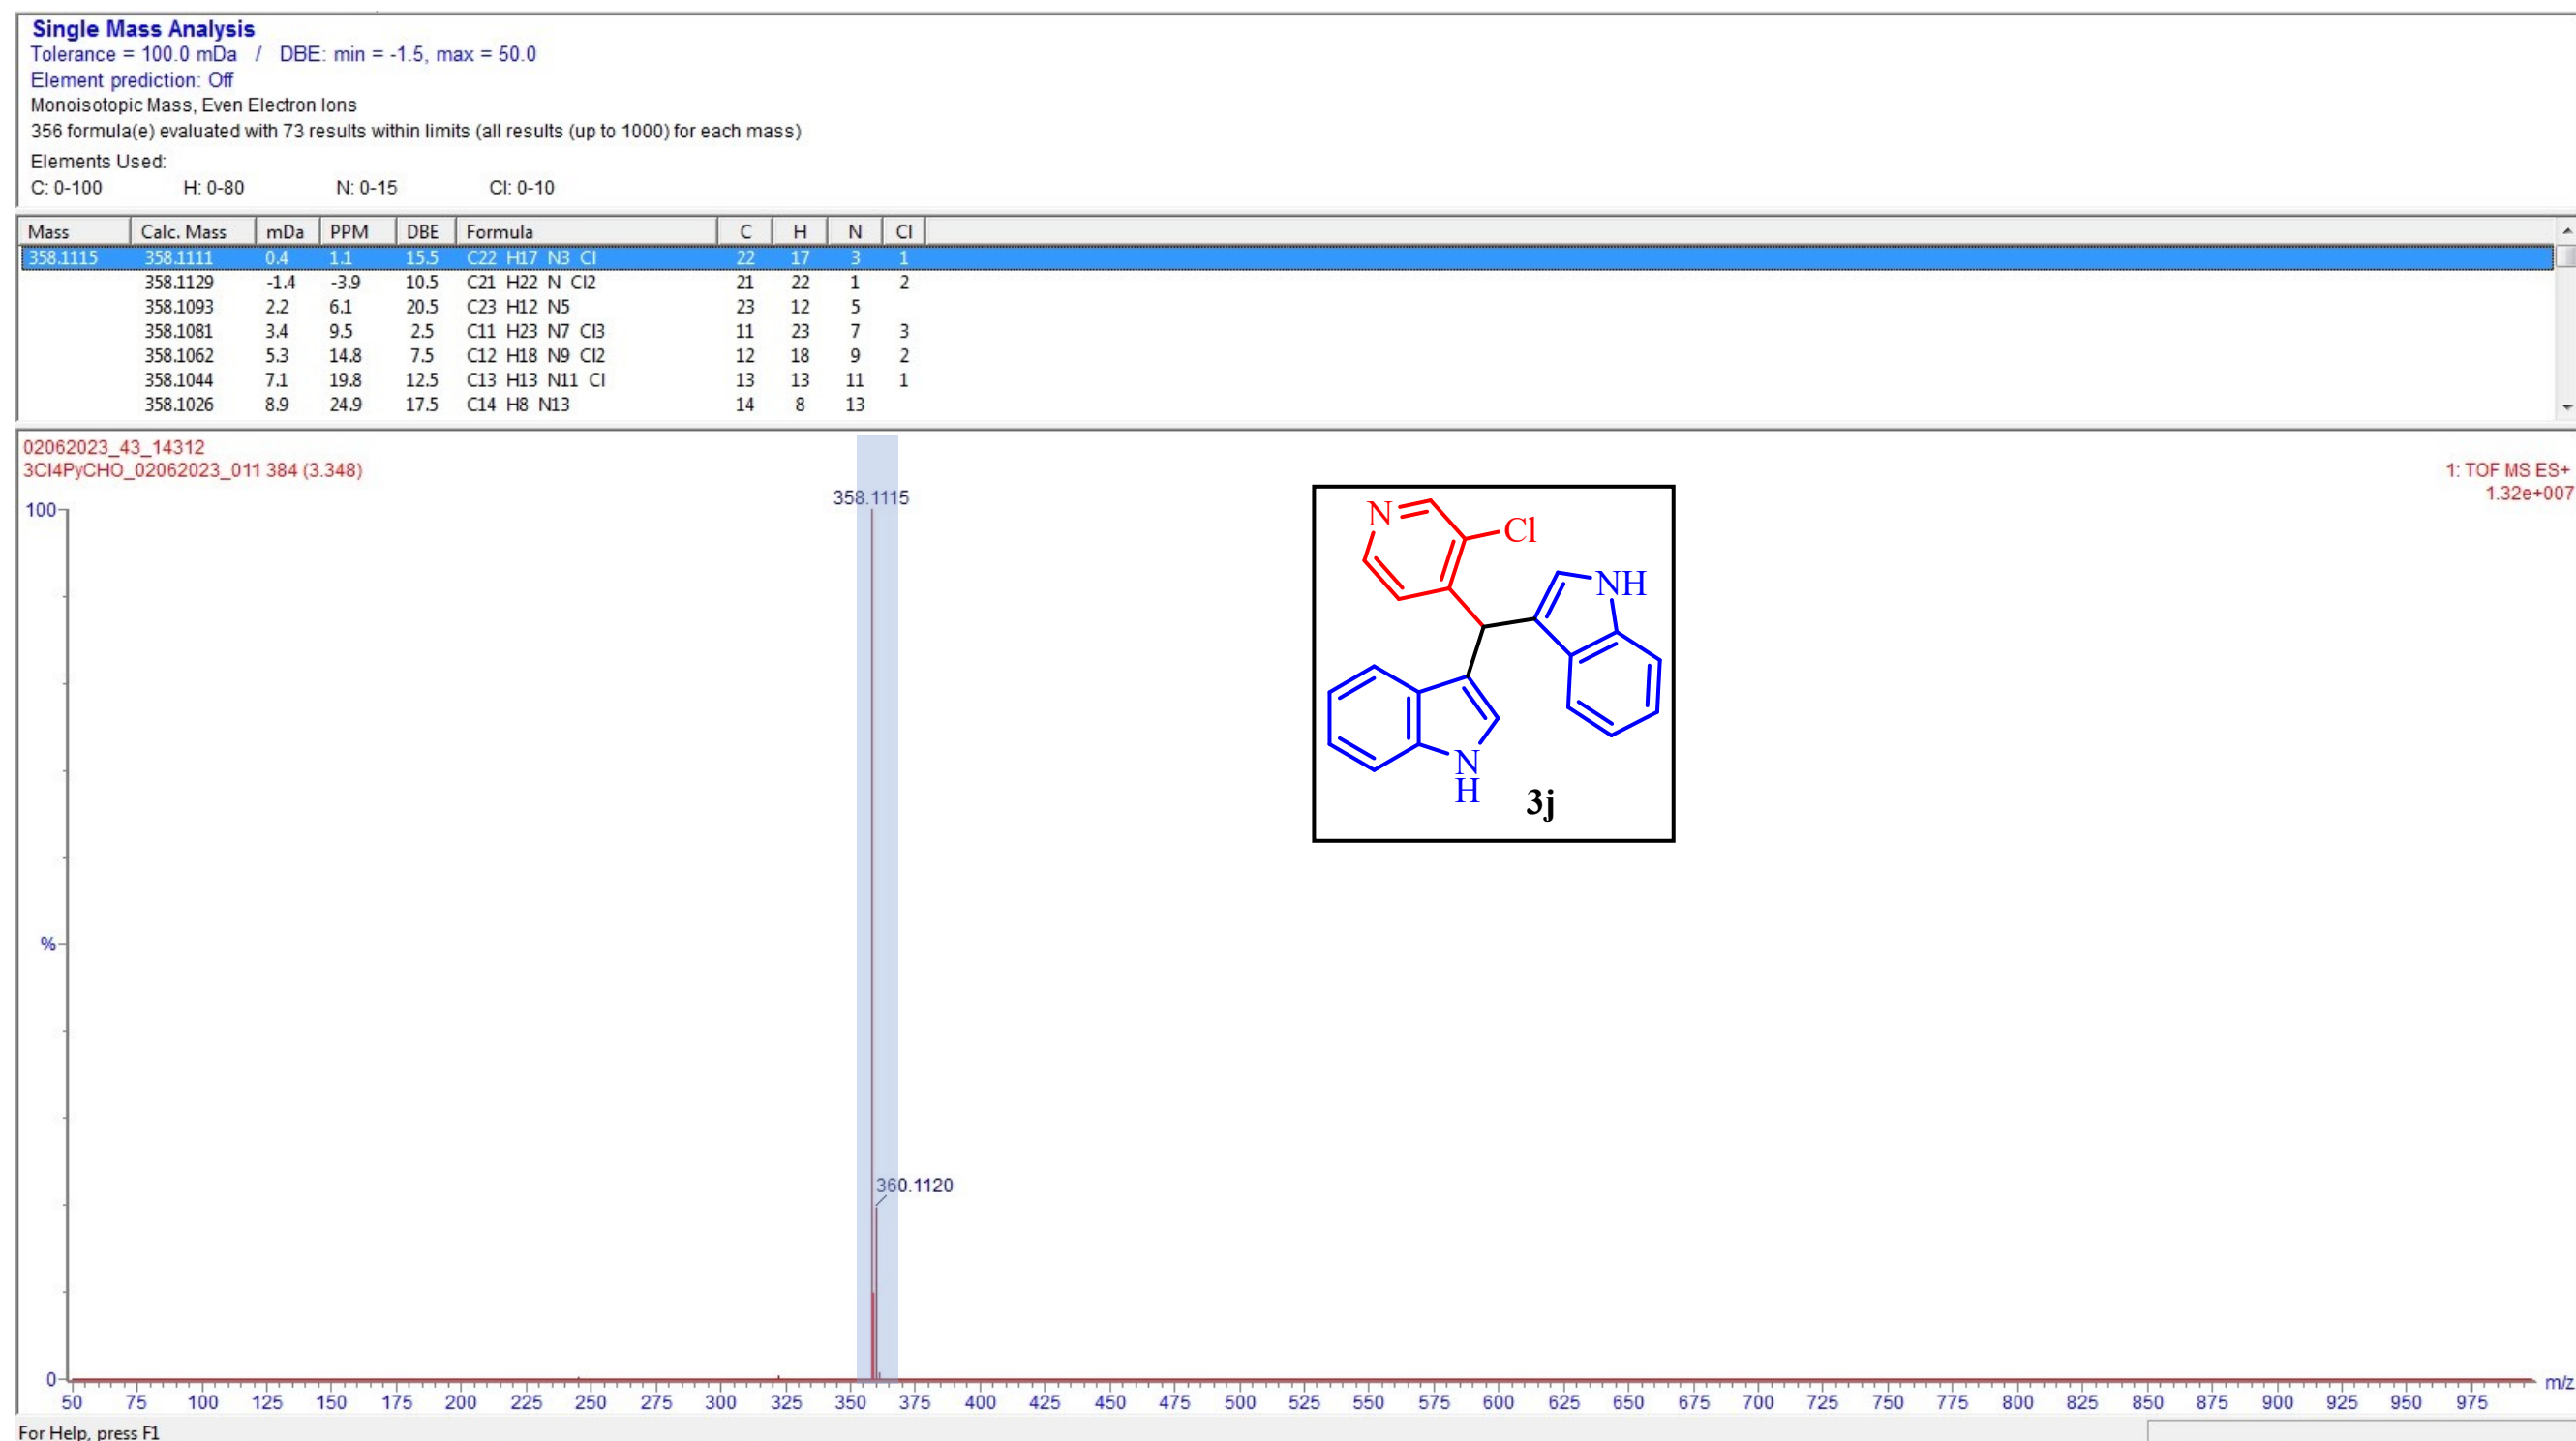

Figure 30. HRMS spectrum of compound **3j**

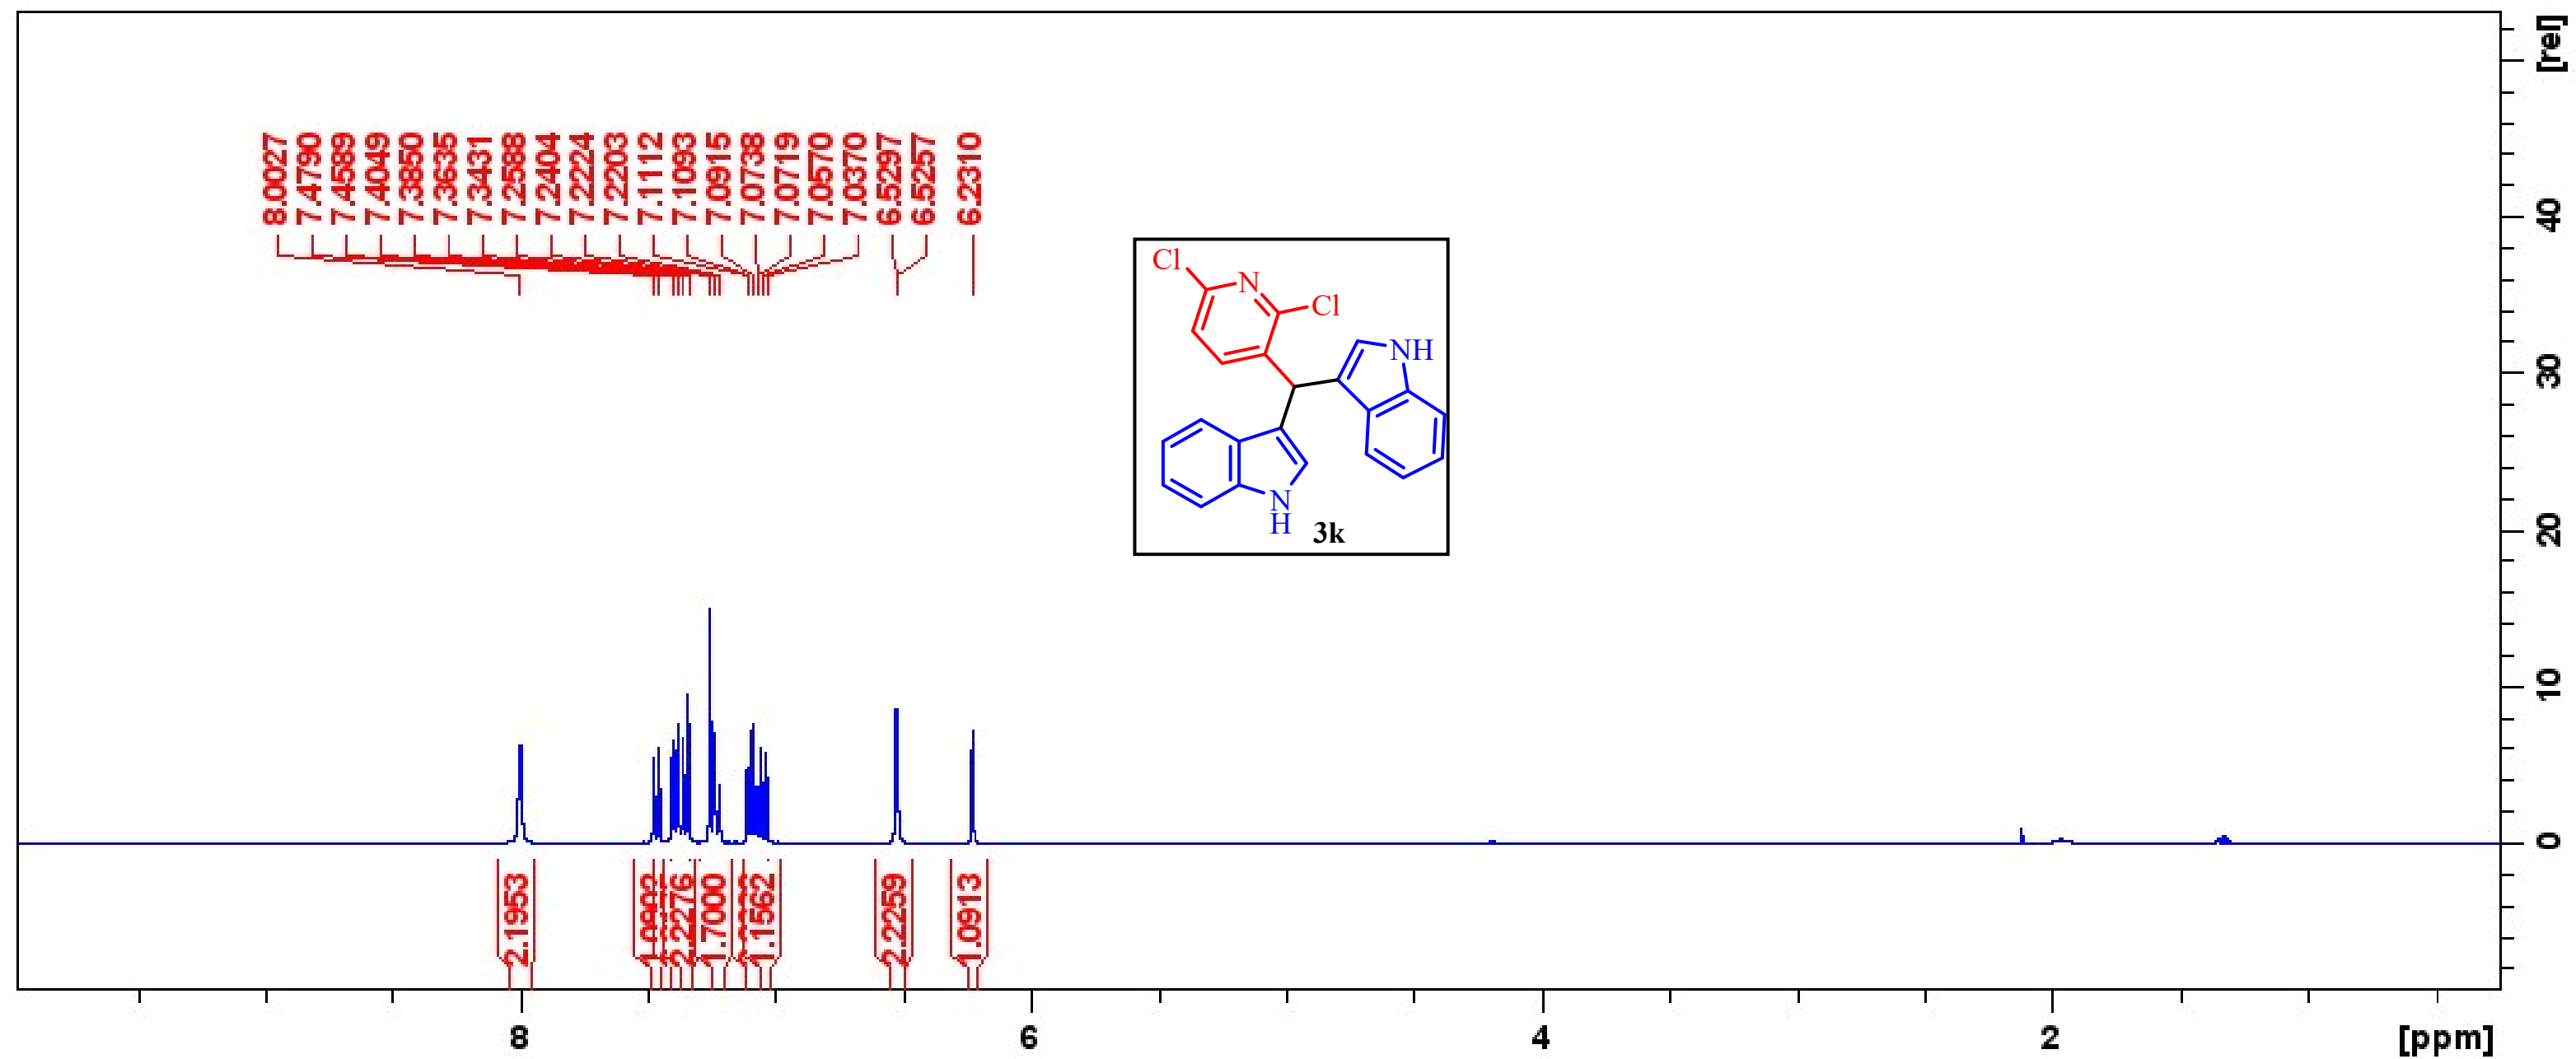

Figure 31. <sup>1</sup>H NMR spectrum of compound **3k**

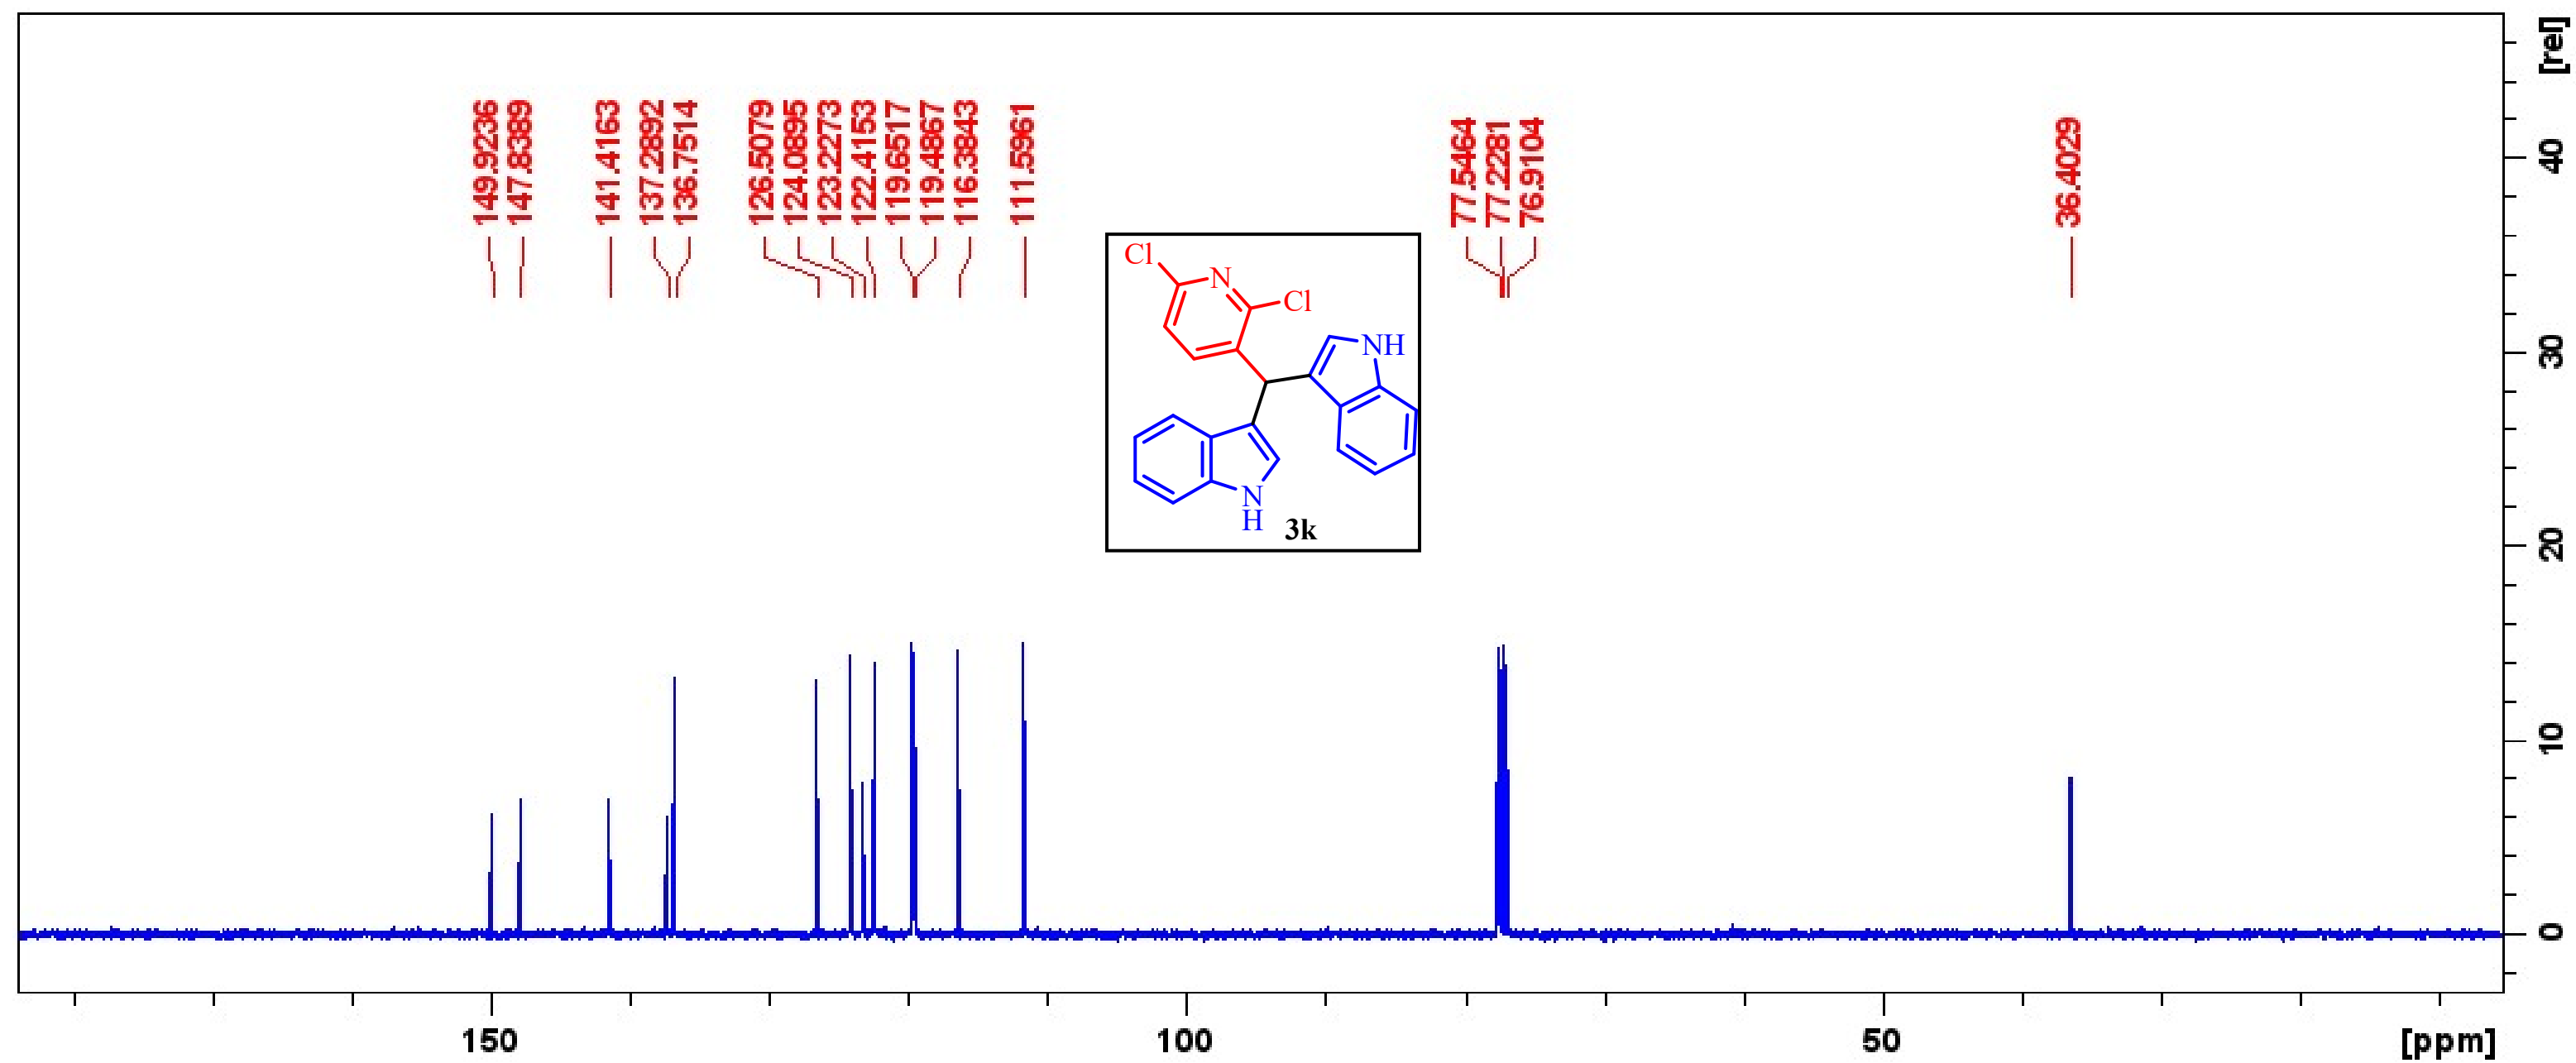

Figure 32. <sup>13</sup>C NMR spectrum of compound **3k**

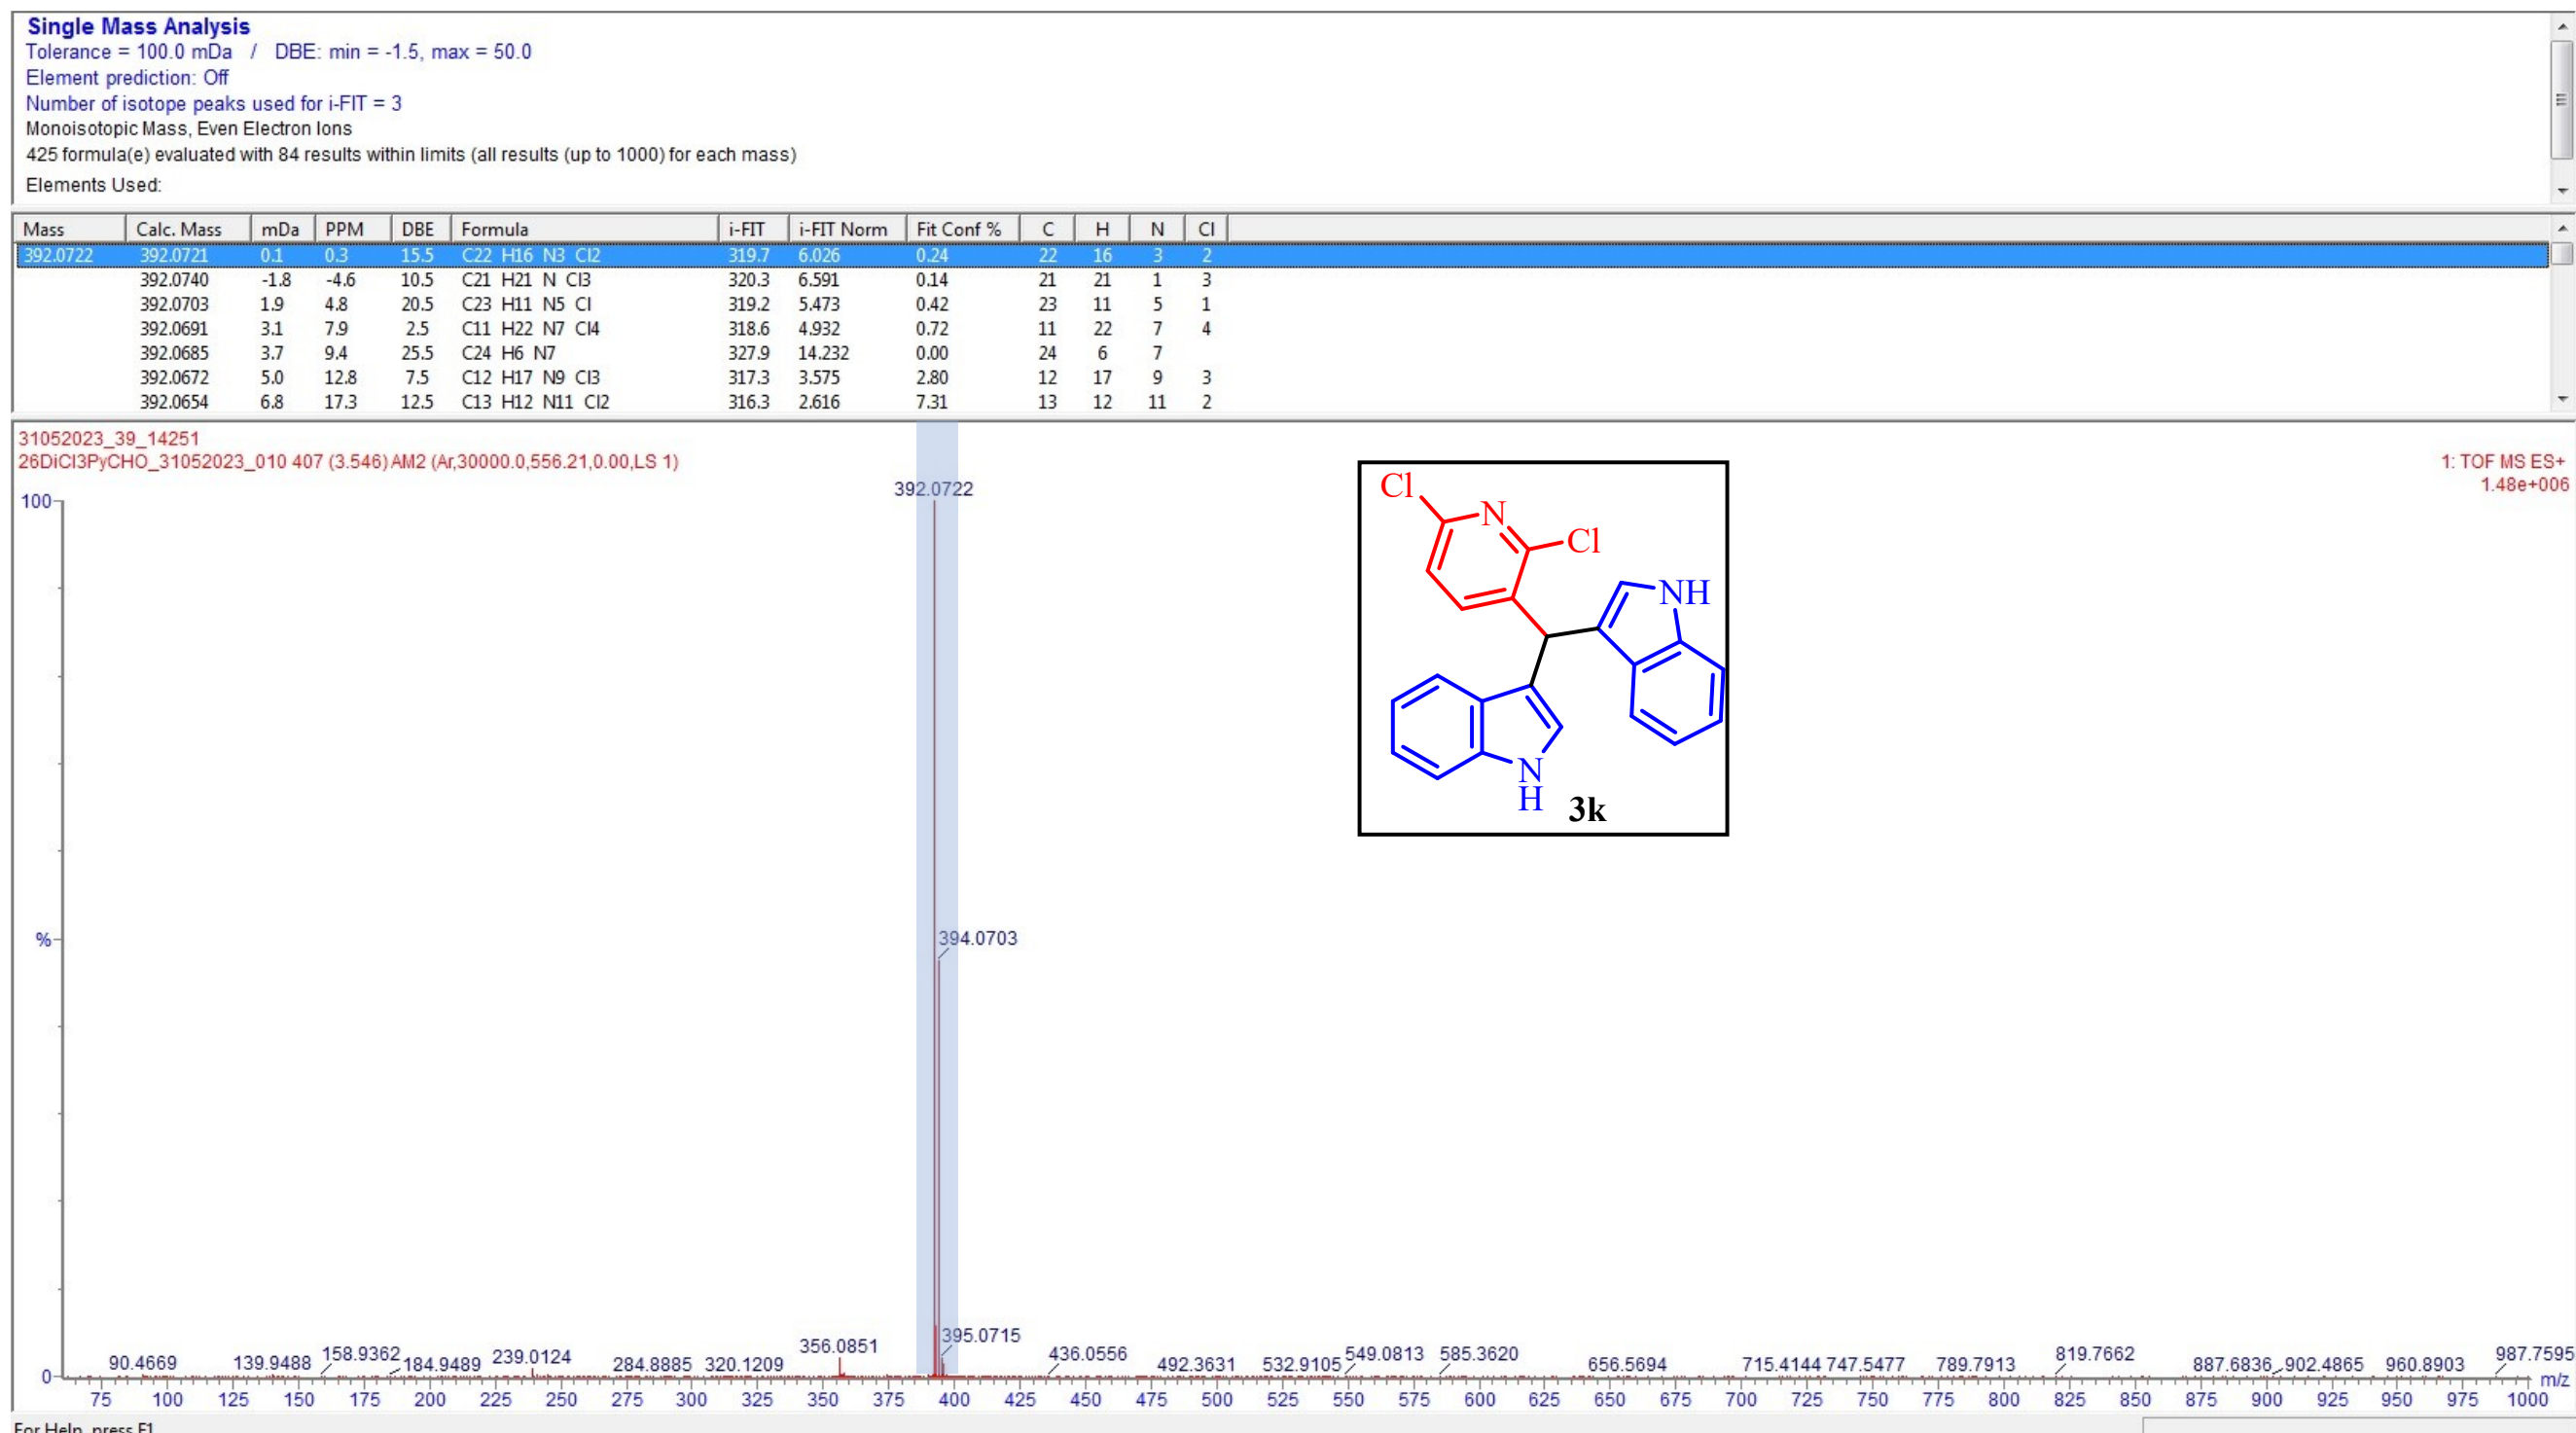

Figure 33. HRMS spectrum of compound **3k**

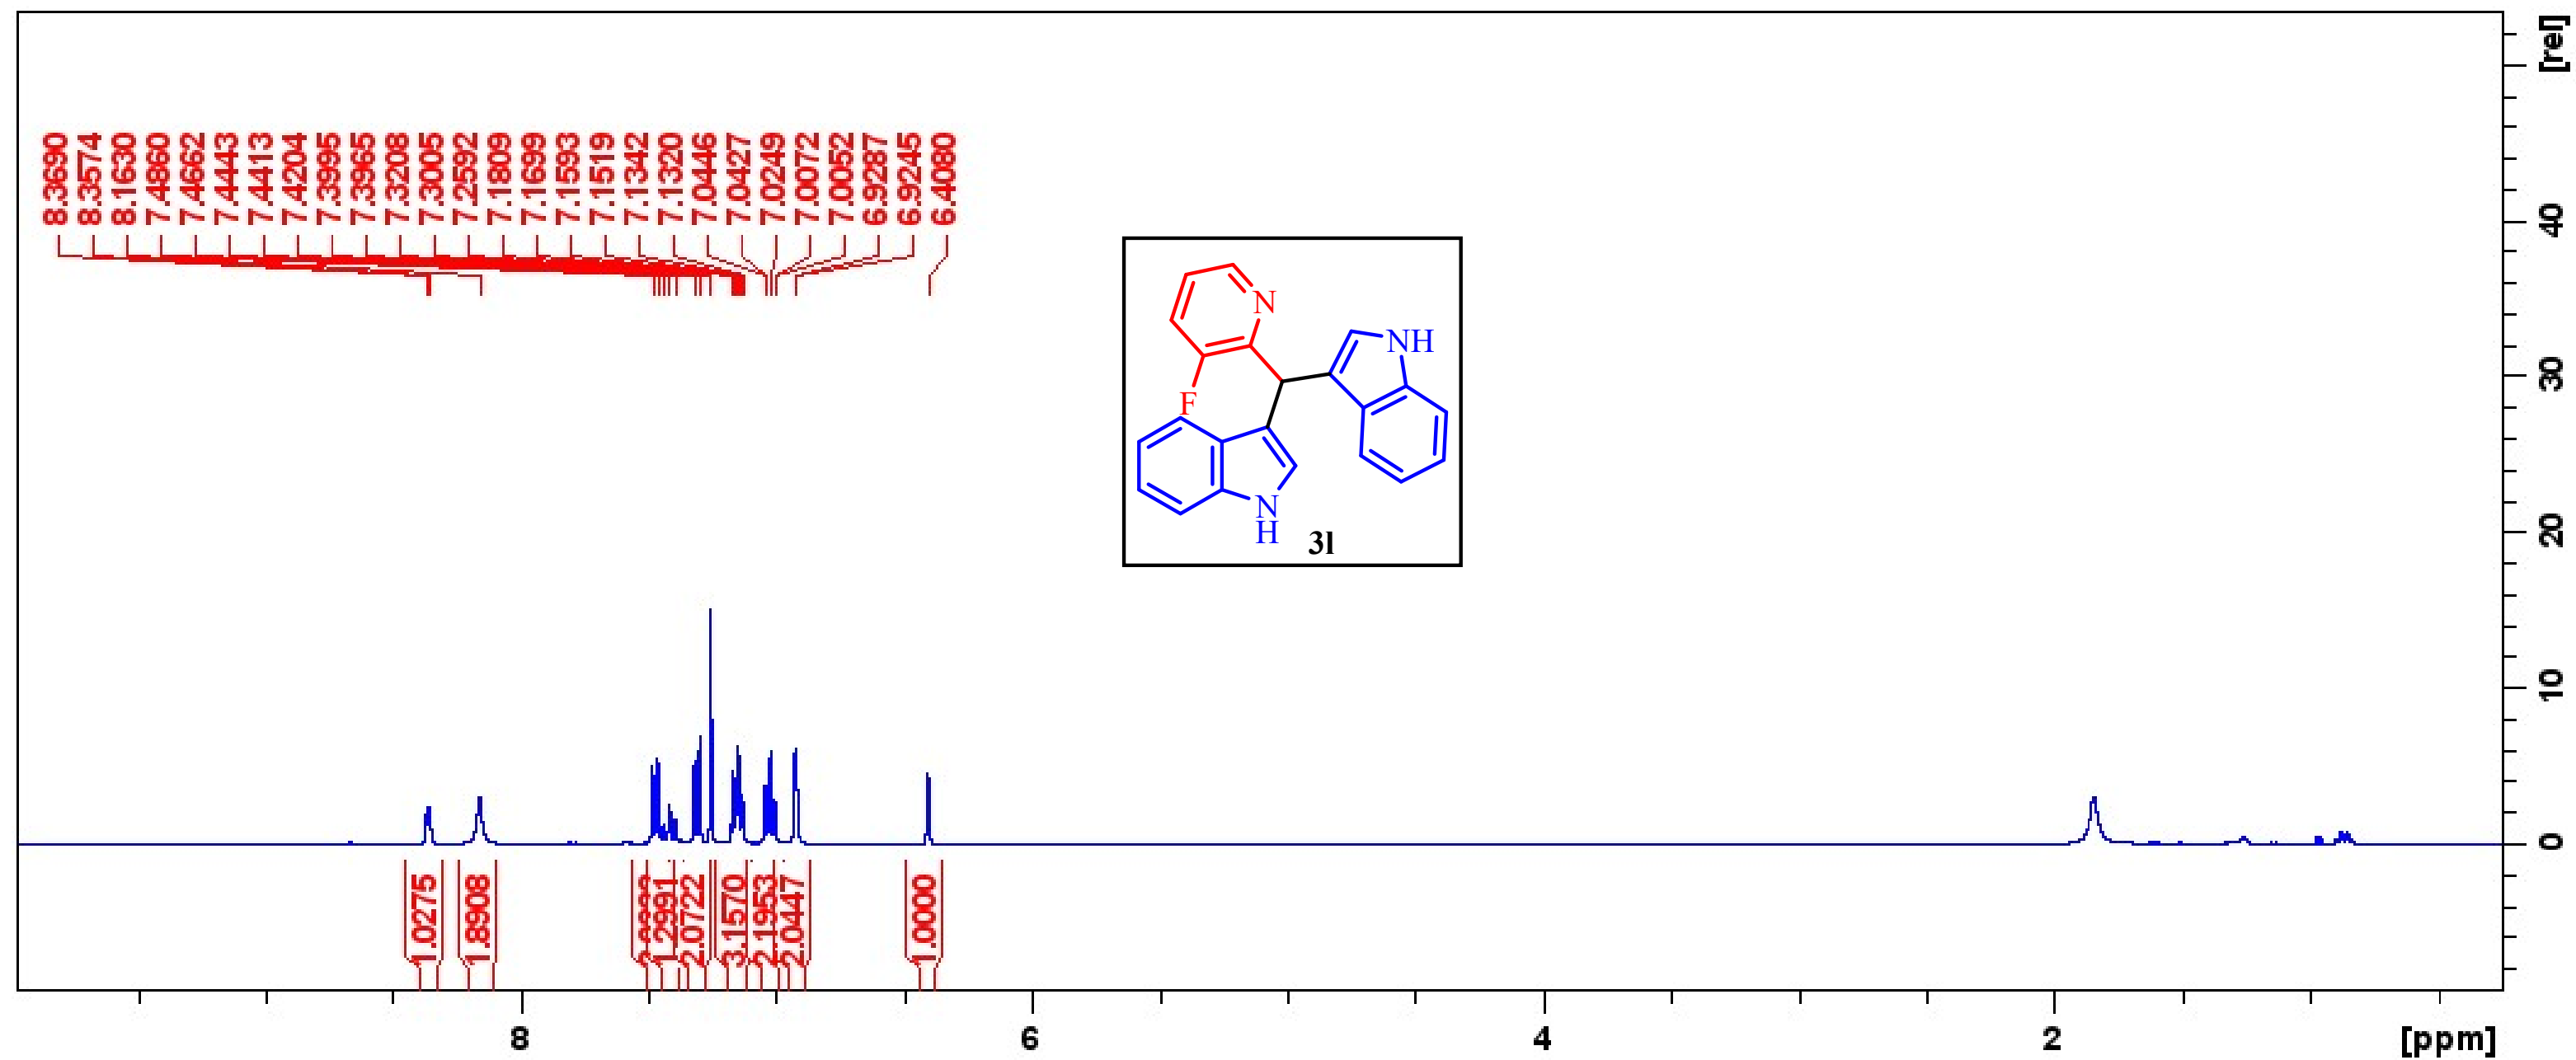

Figure 34. <sup>1</sup>H NMR spectrum of compound **3l**

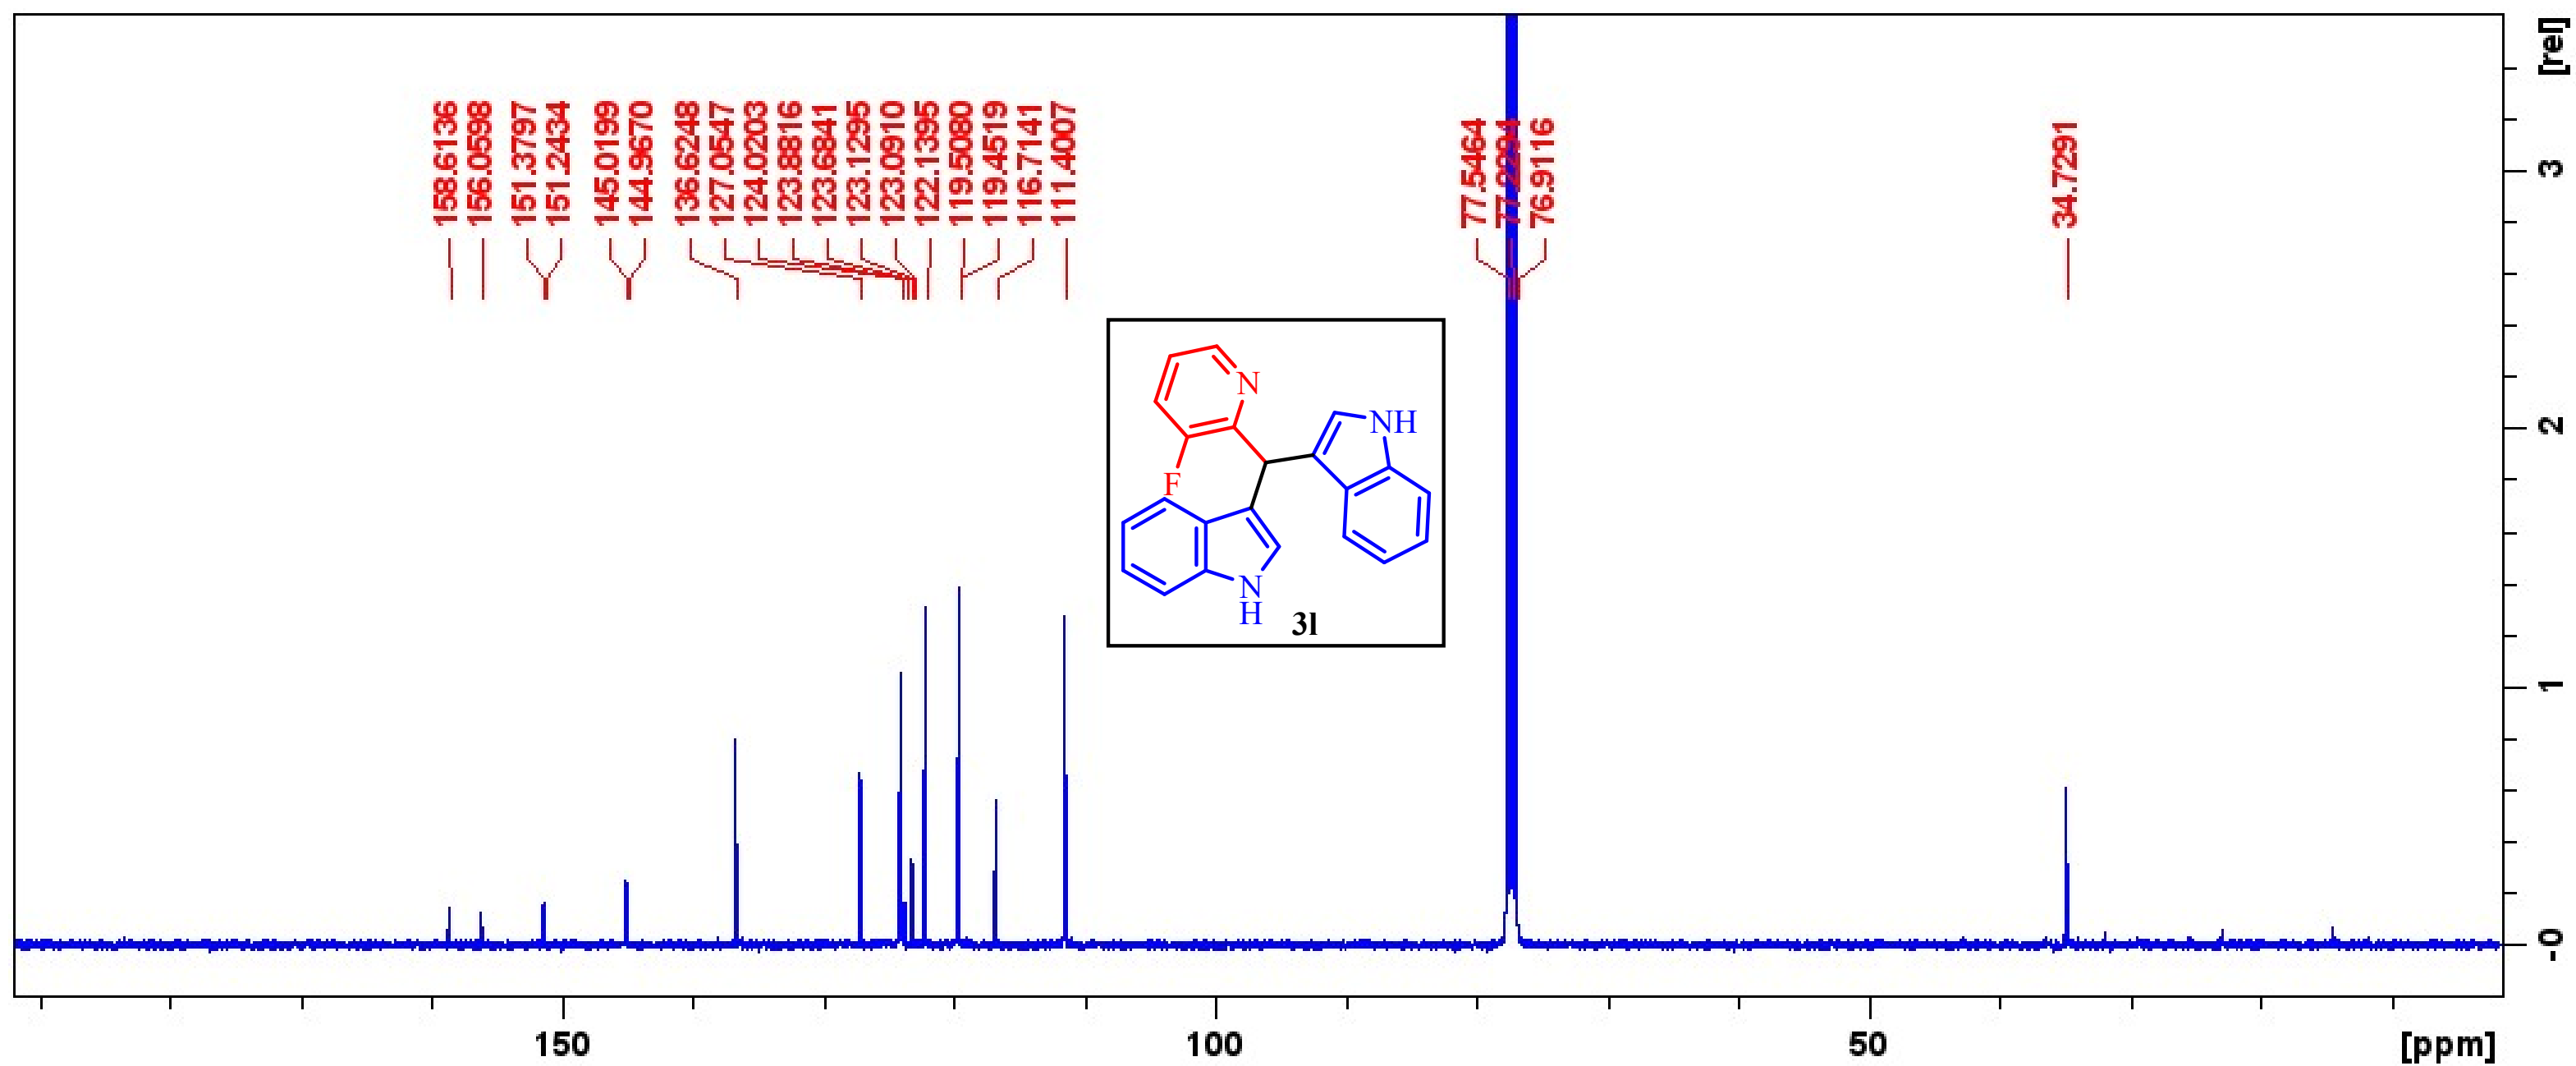

Figure 35. <sup>13</sup>C NMR spectrum of compound **3l**

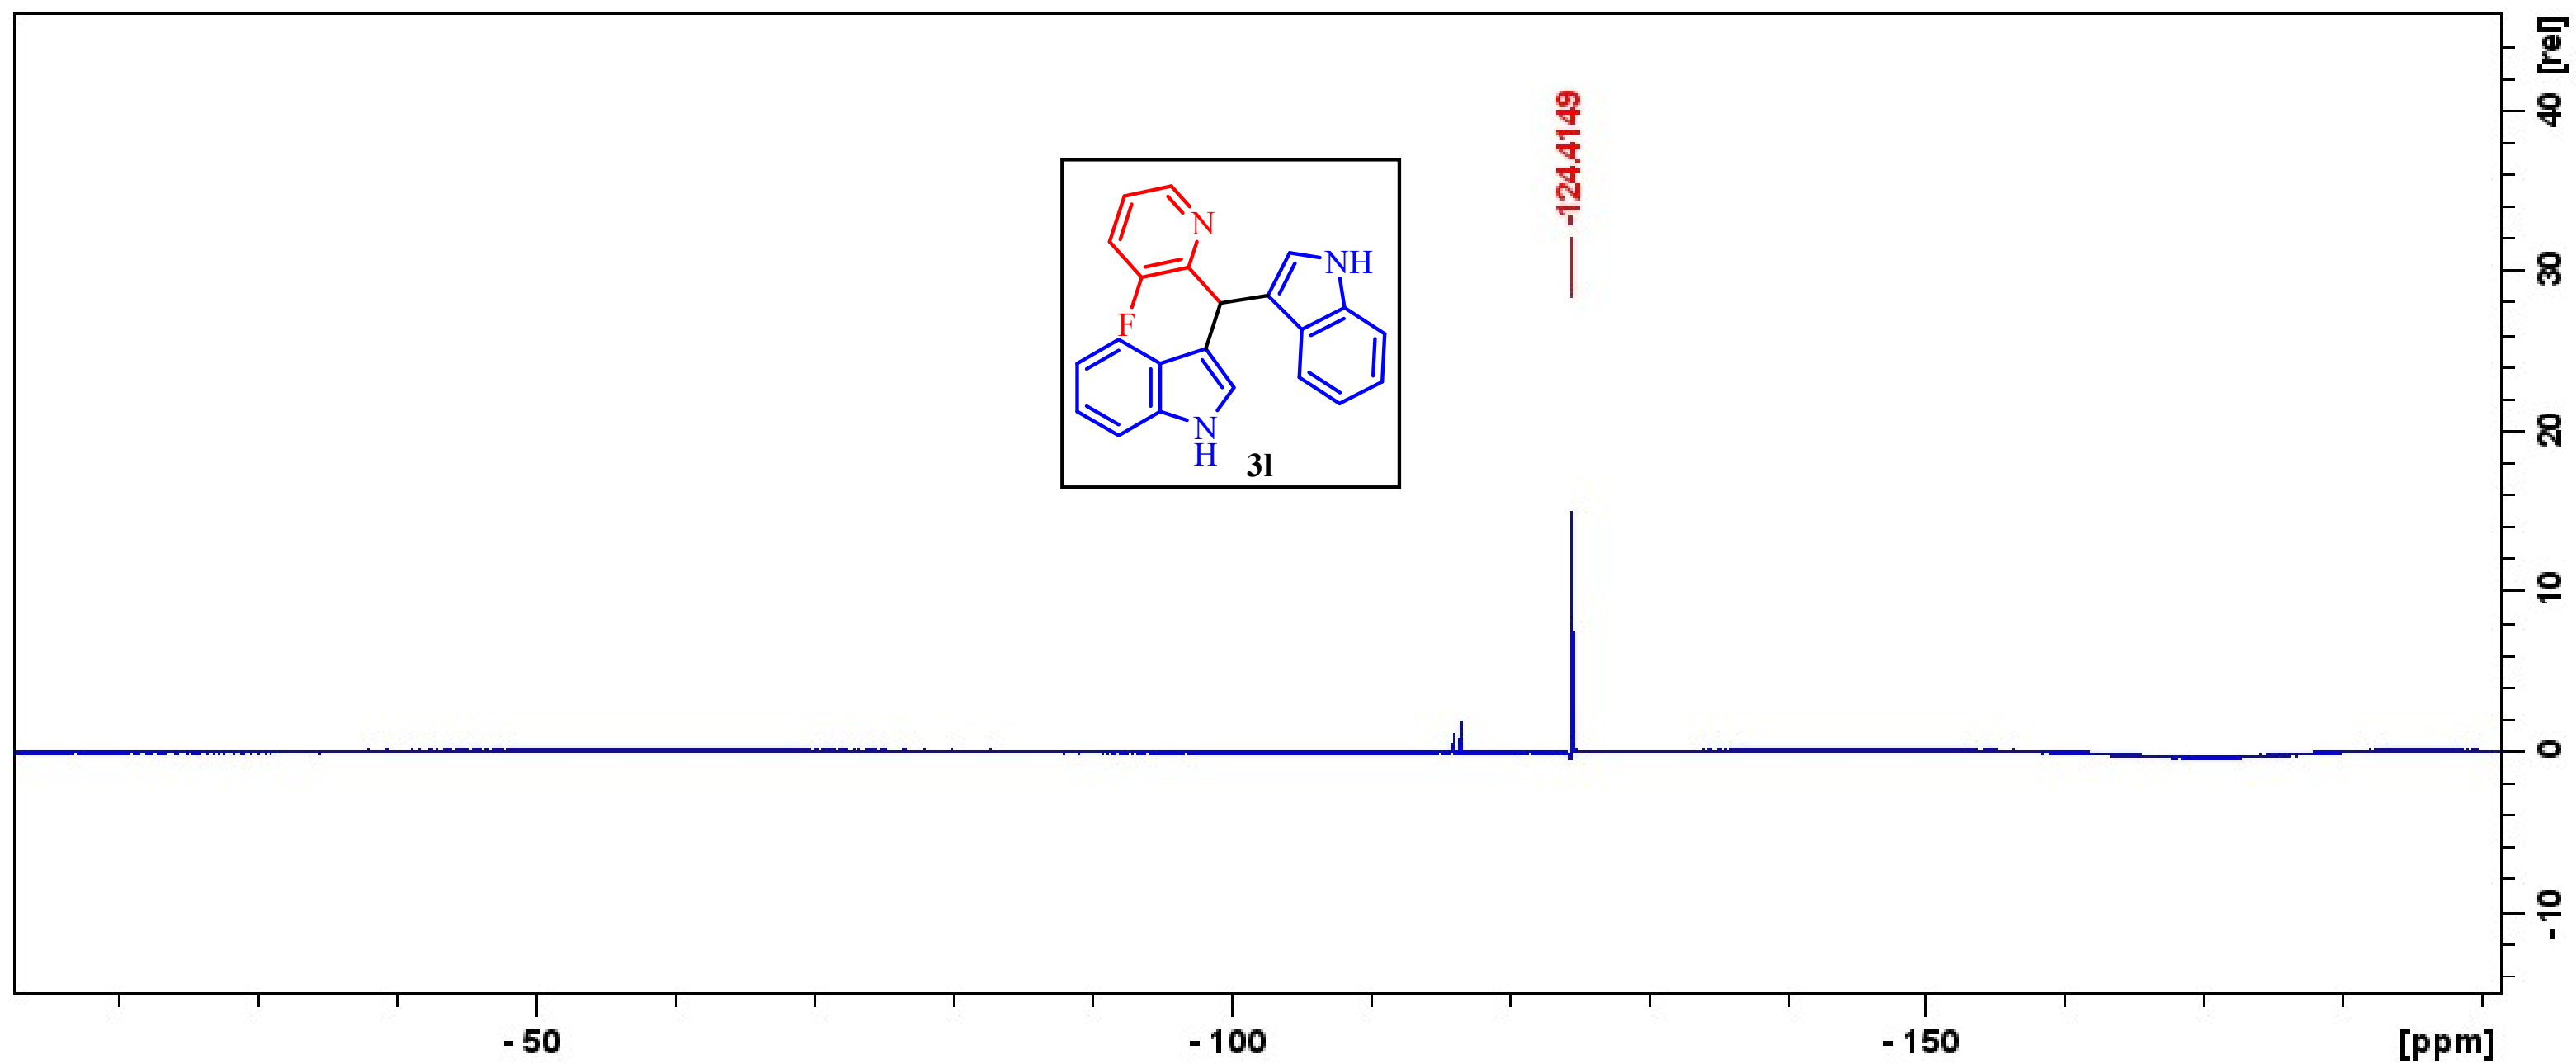

Figure 36.  $^{19}\text{F}$  NMR spectrum of compound **3l**

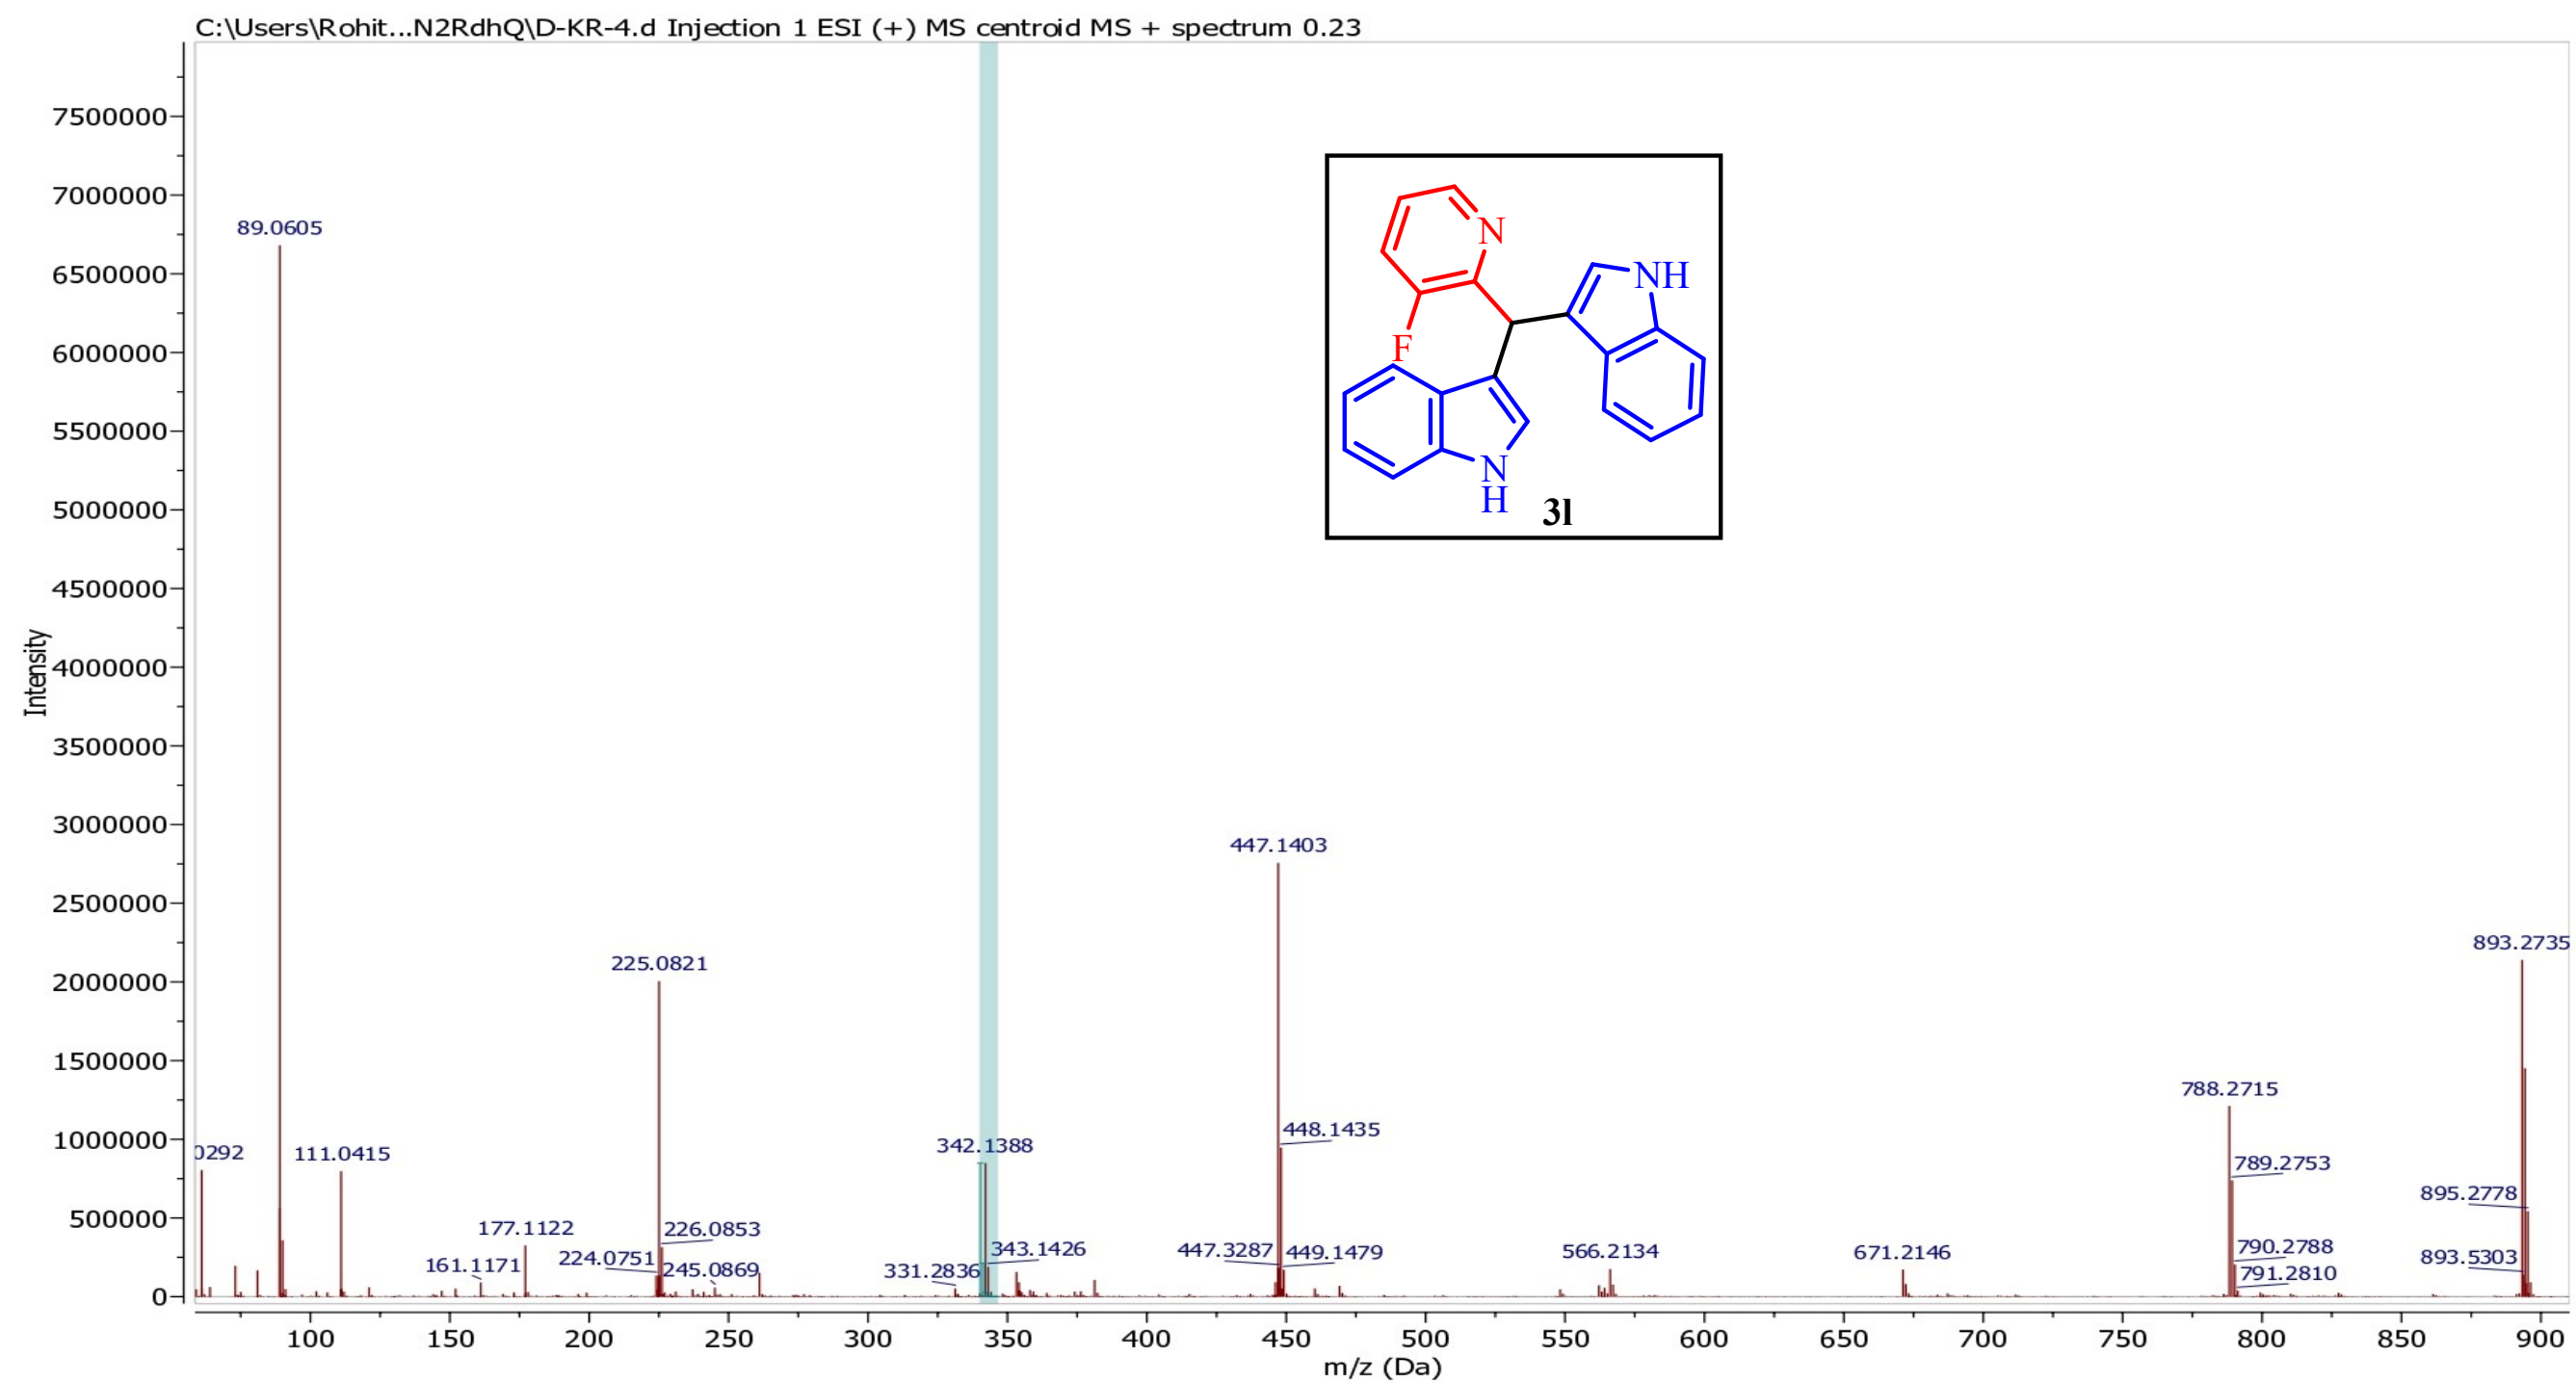

Figure 37. HRMS spectrum of compound **3l**



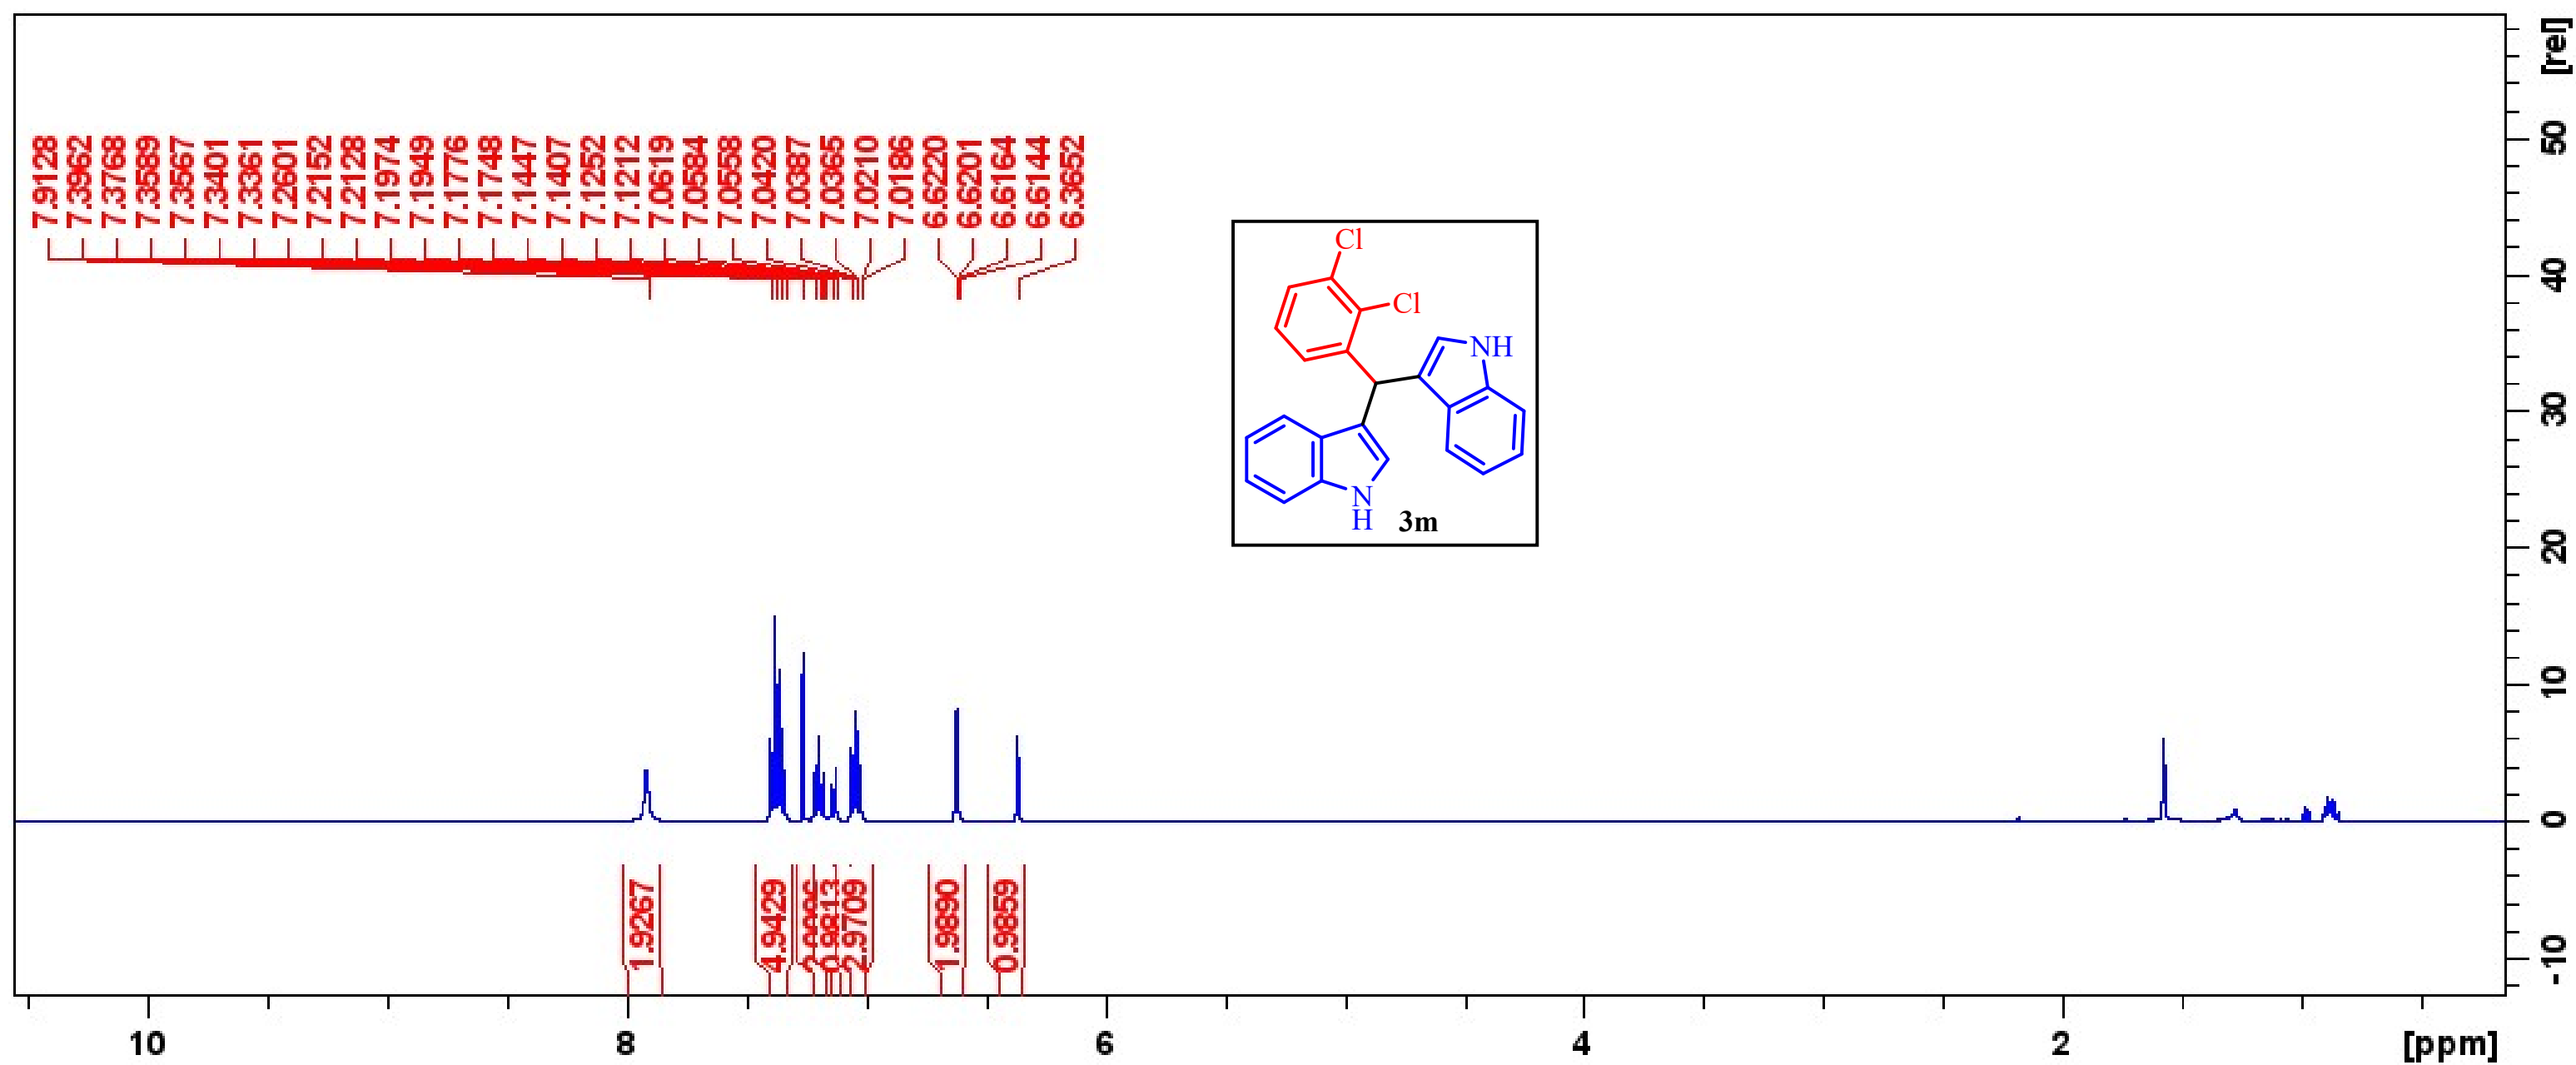

Figure 38. <sup>1</sup>H NMR spectrum of compound **3m**

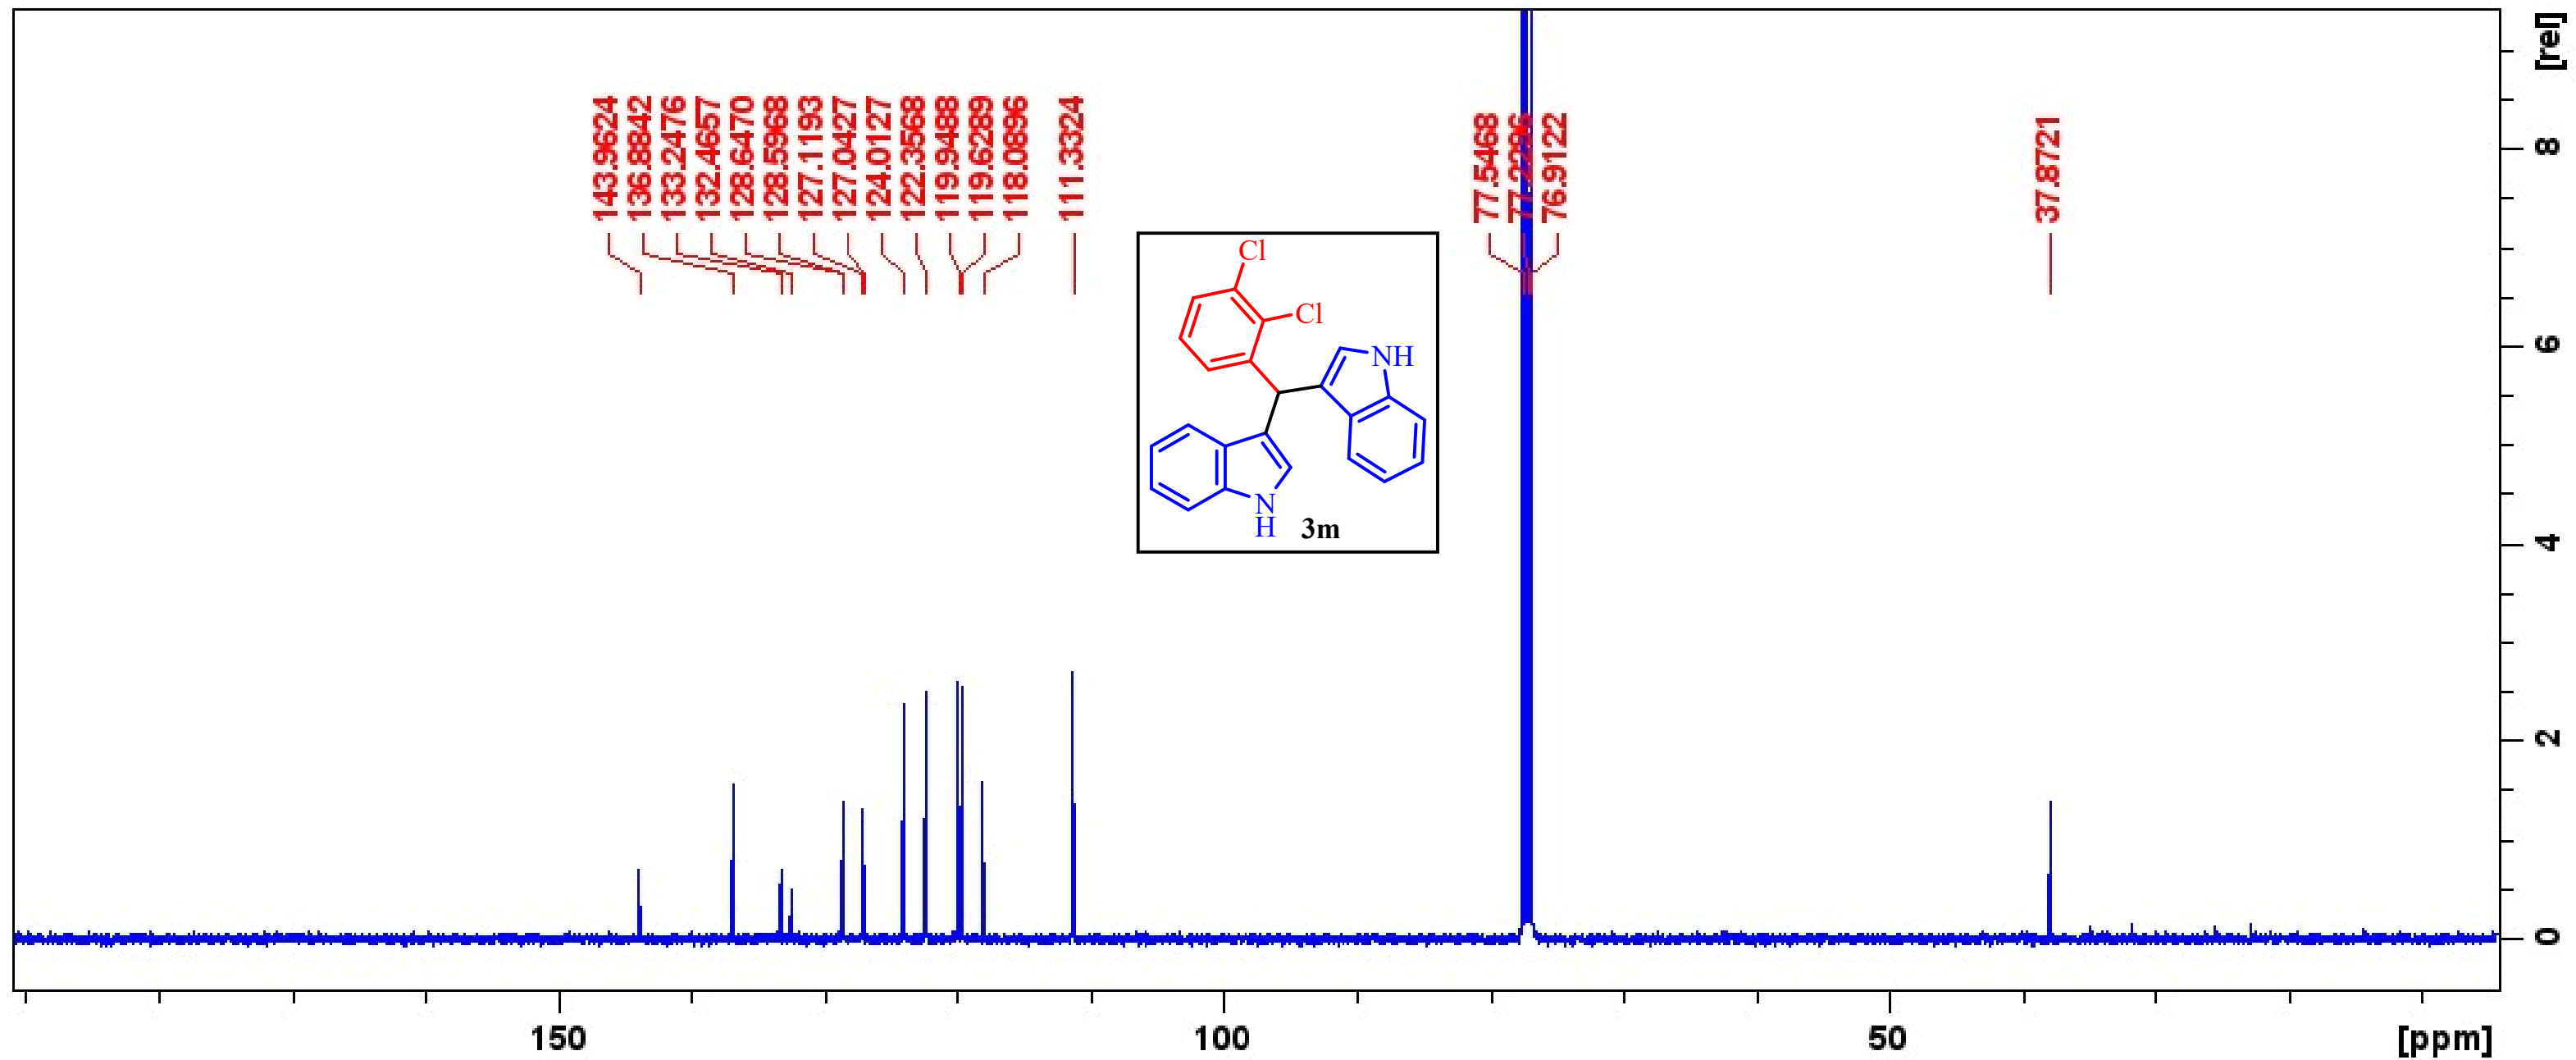

Figure 39.  $^{13}\text{C}$  NMR spectrum of compound **3m**

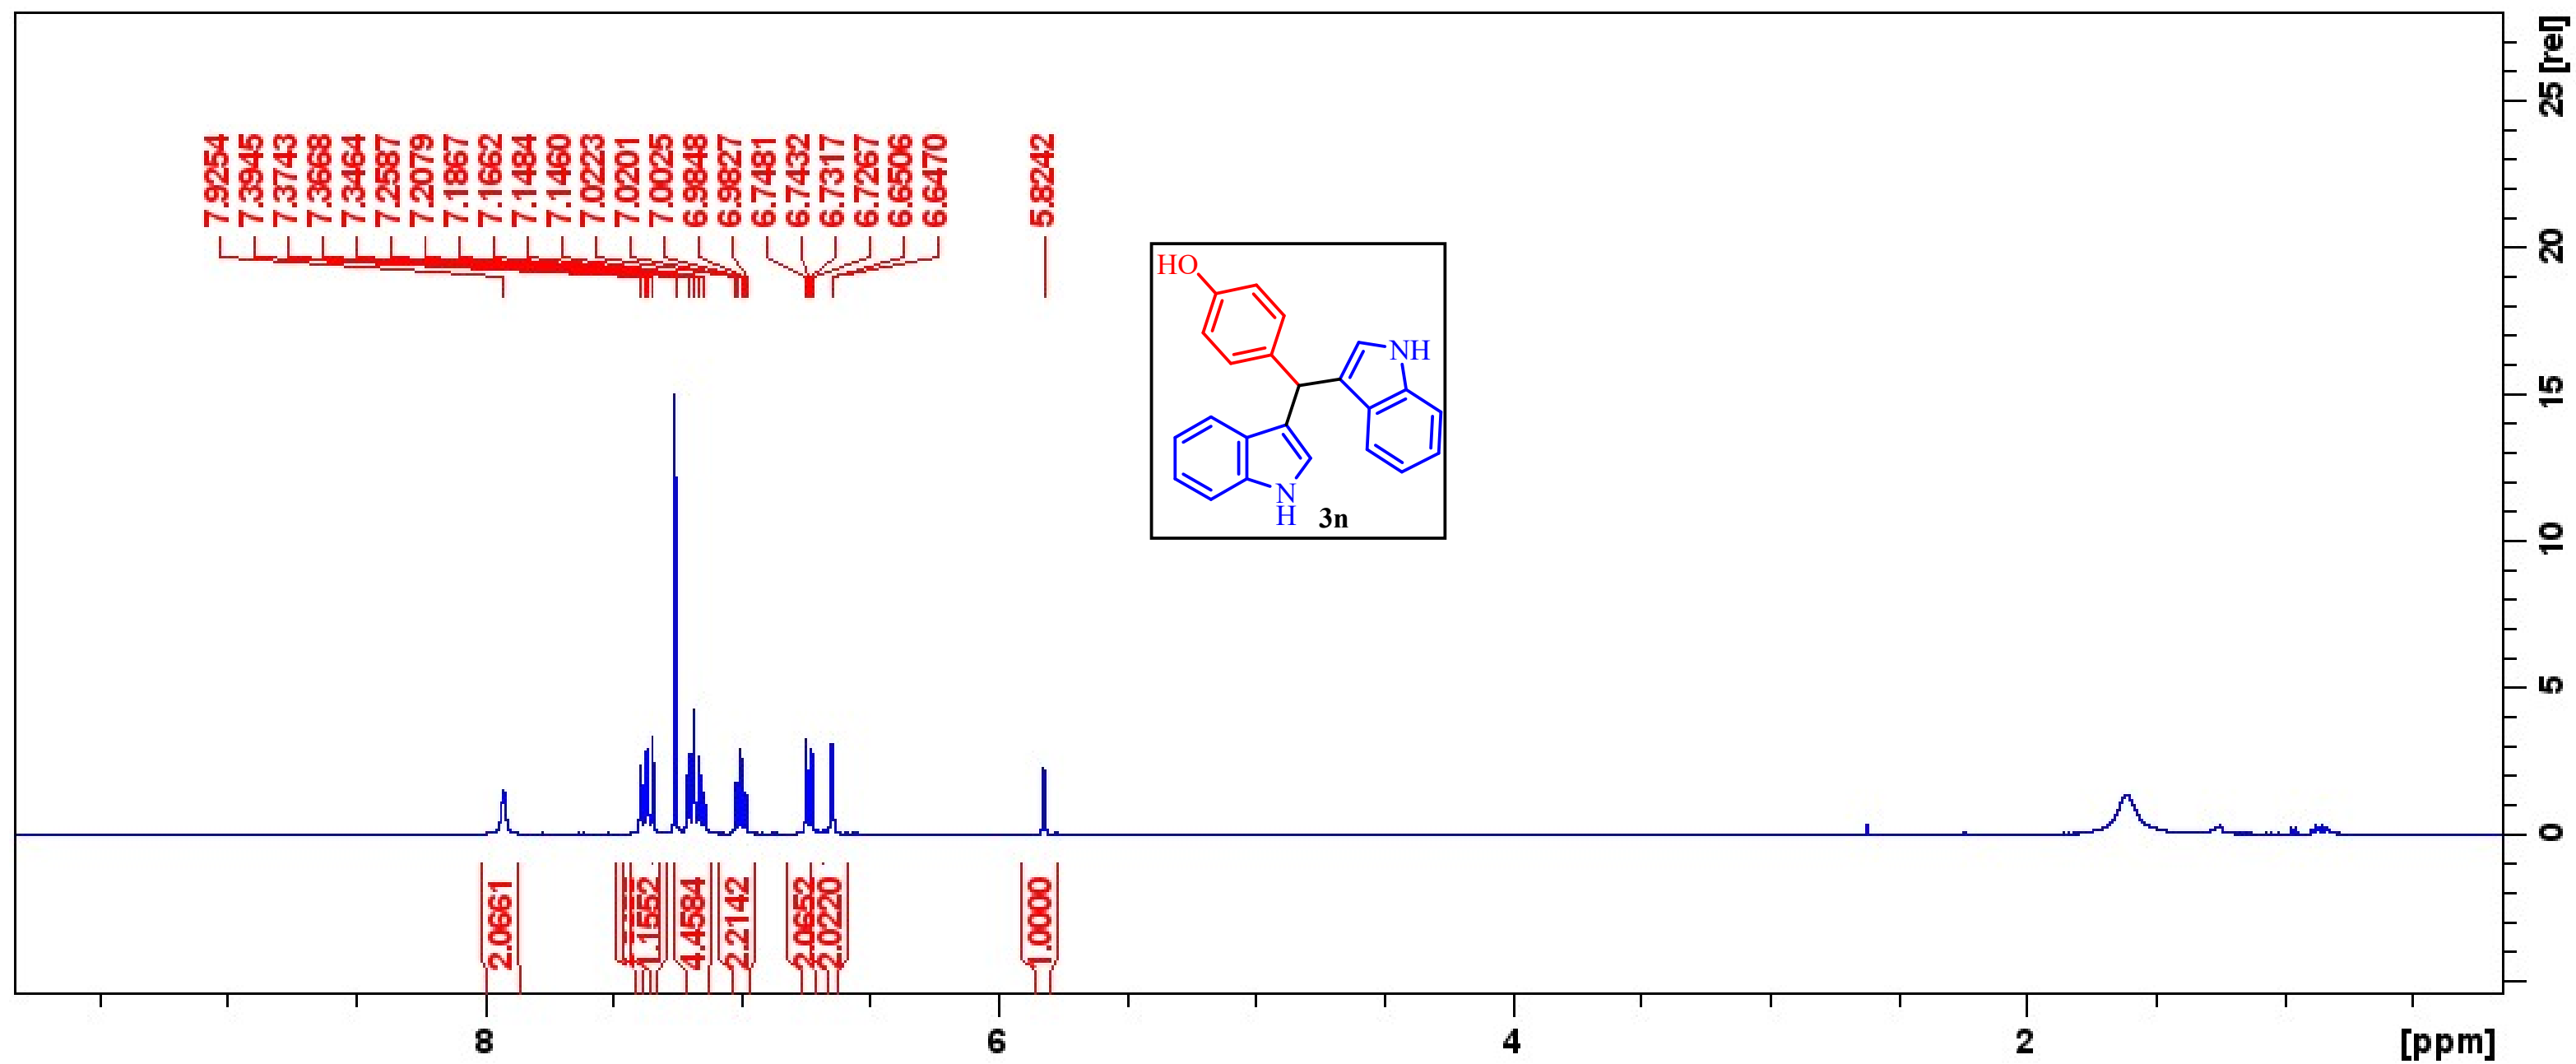

Figure 40.  $^1\text{H}$  NMR spectrum of compound **3n**

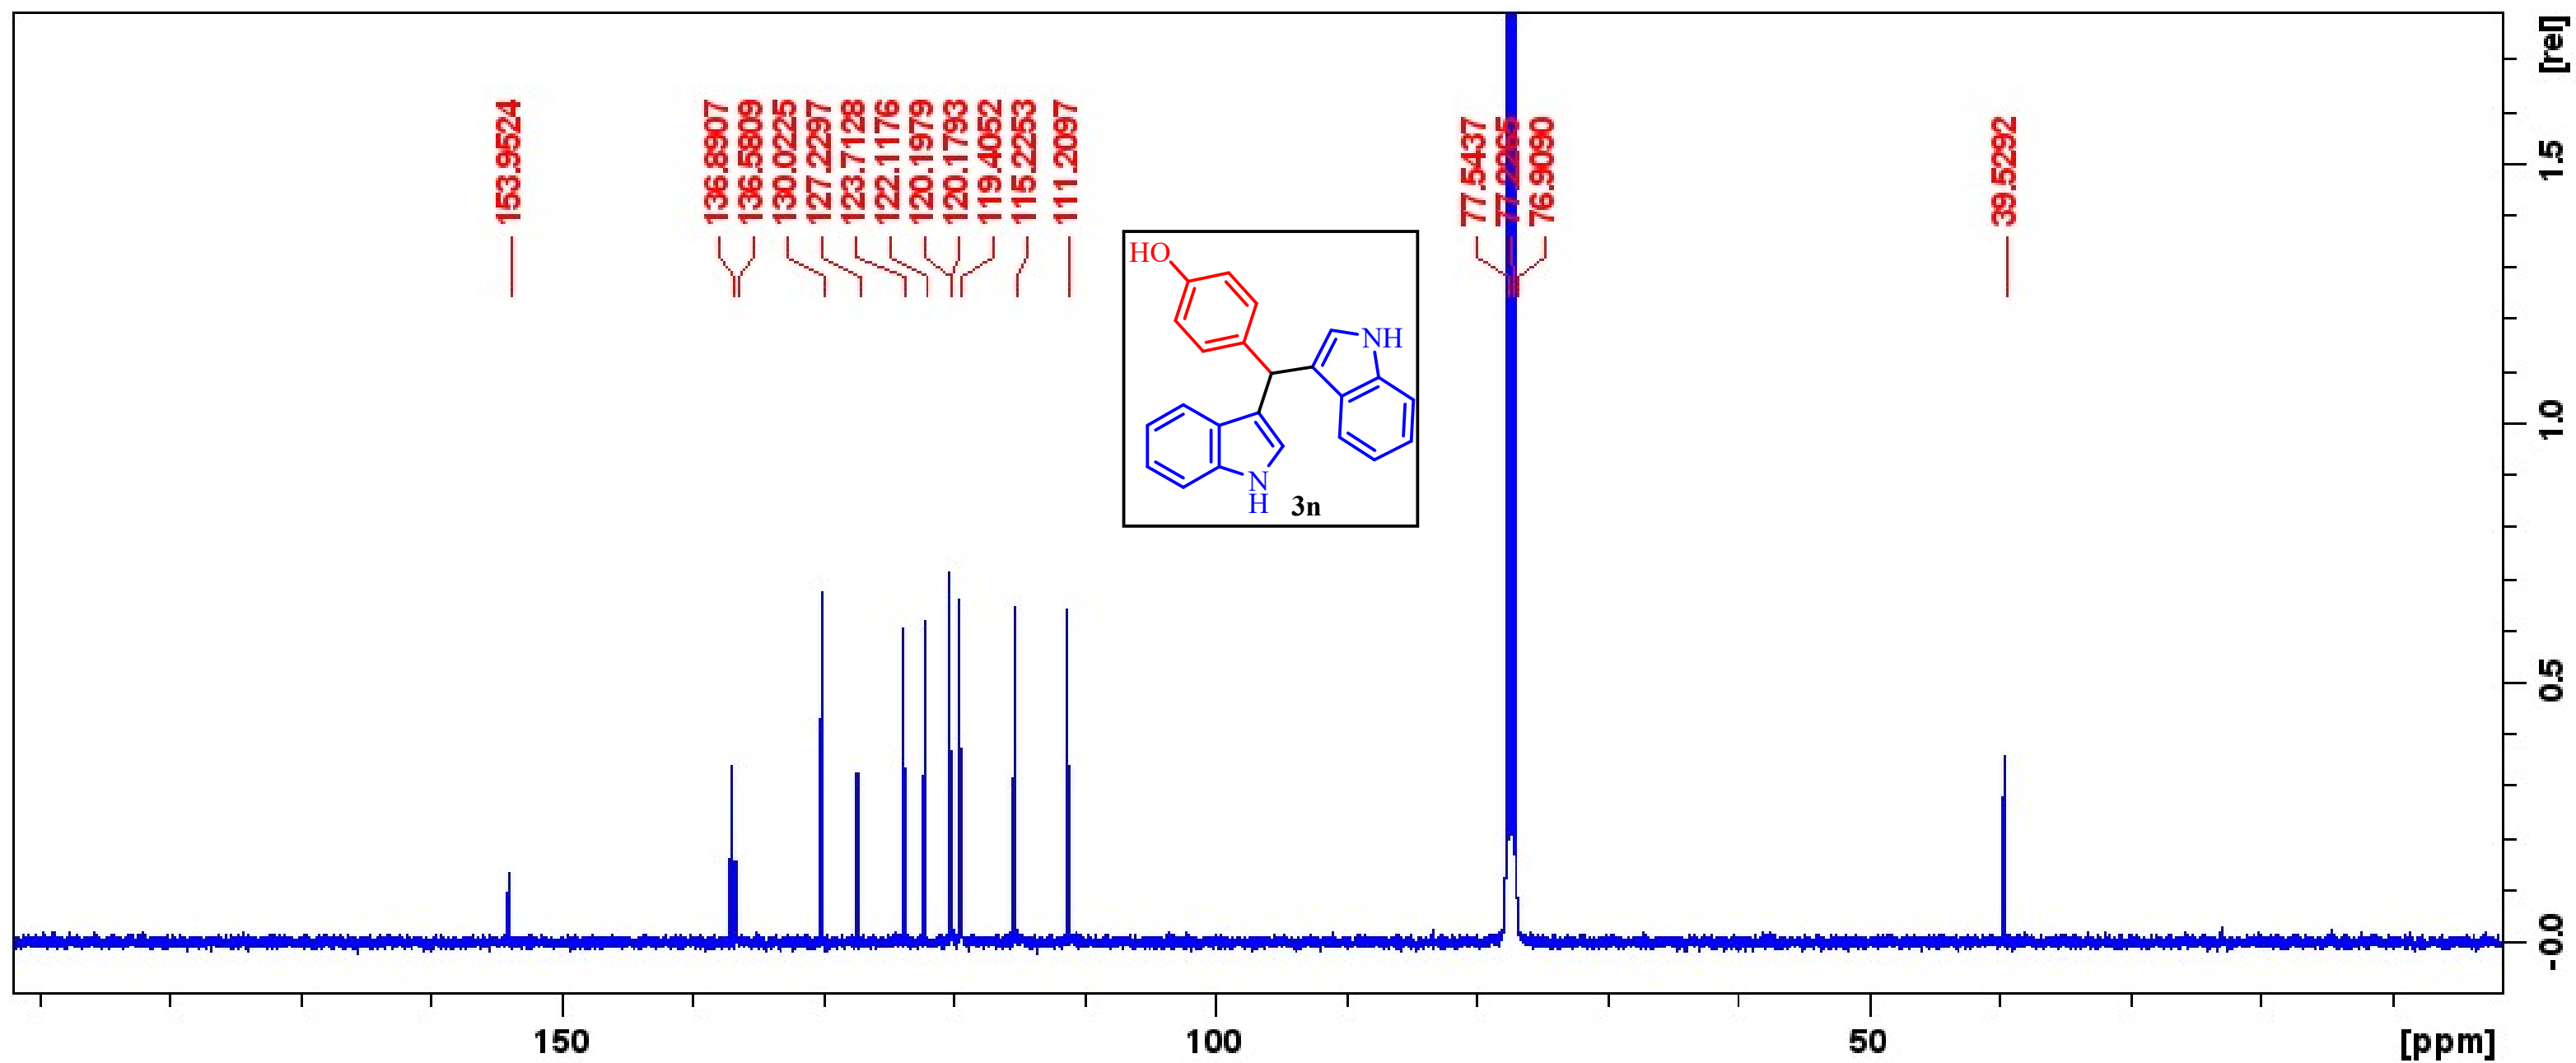

Figure 41.  $^{13}\text{C}$  NMR spectrum of compound **3n**

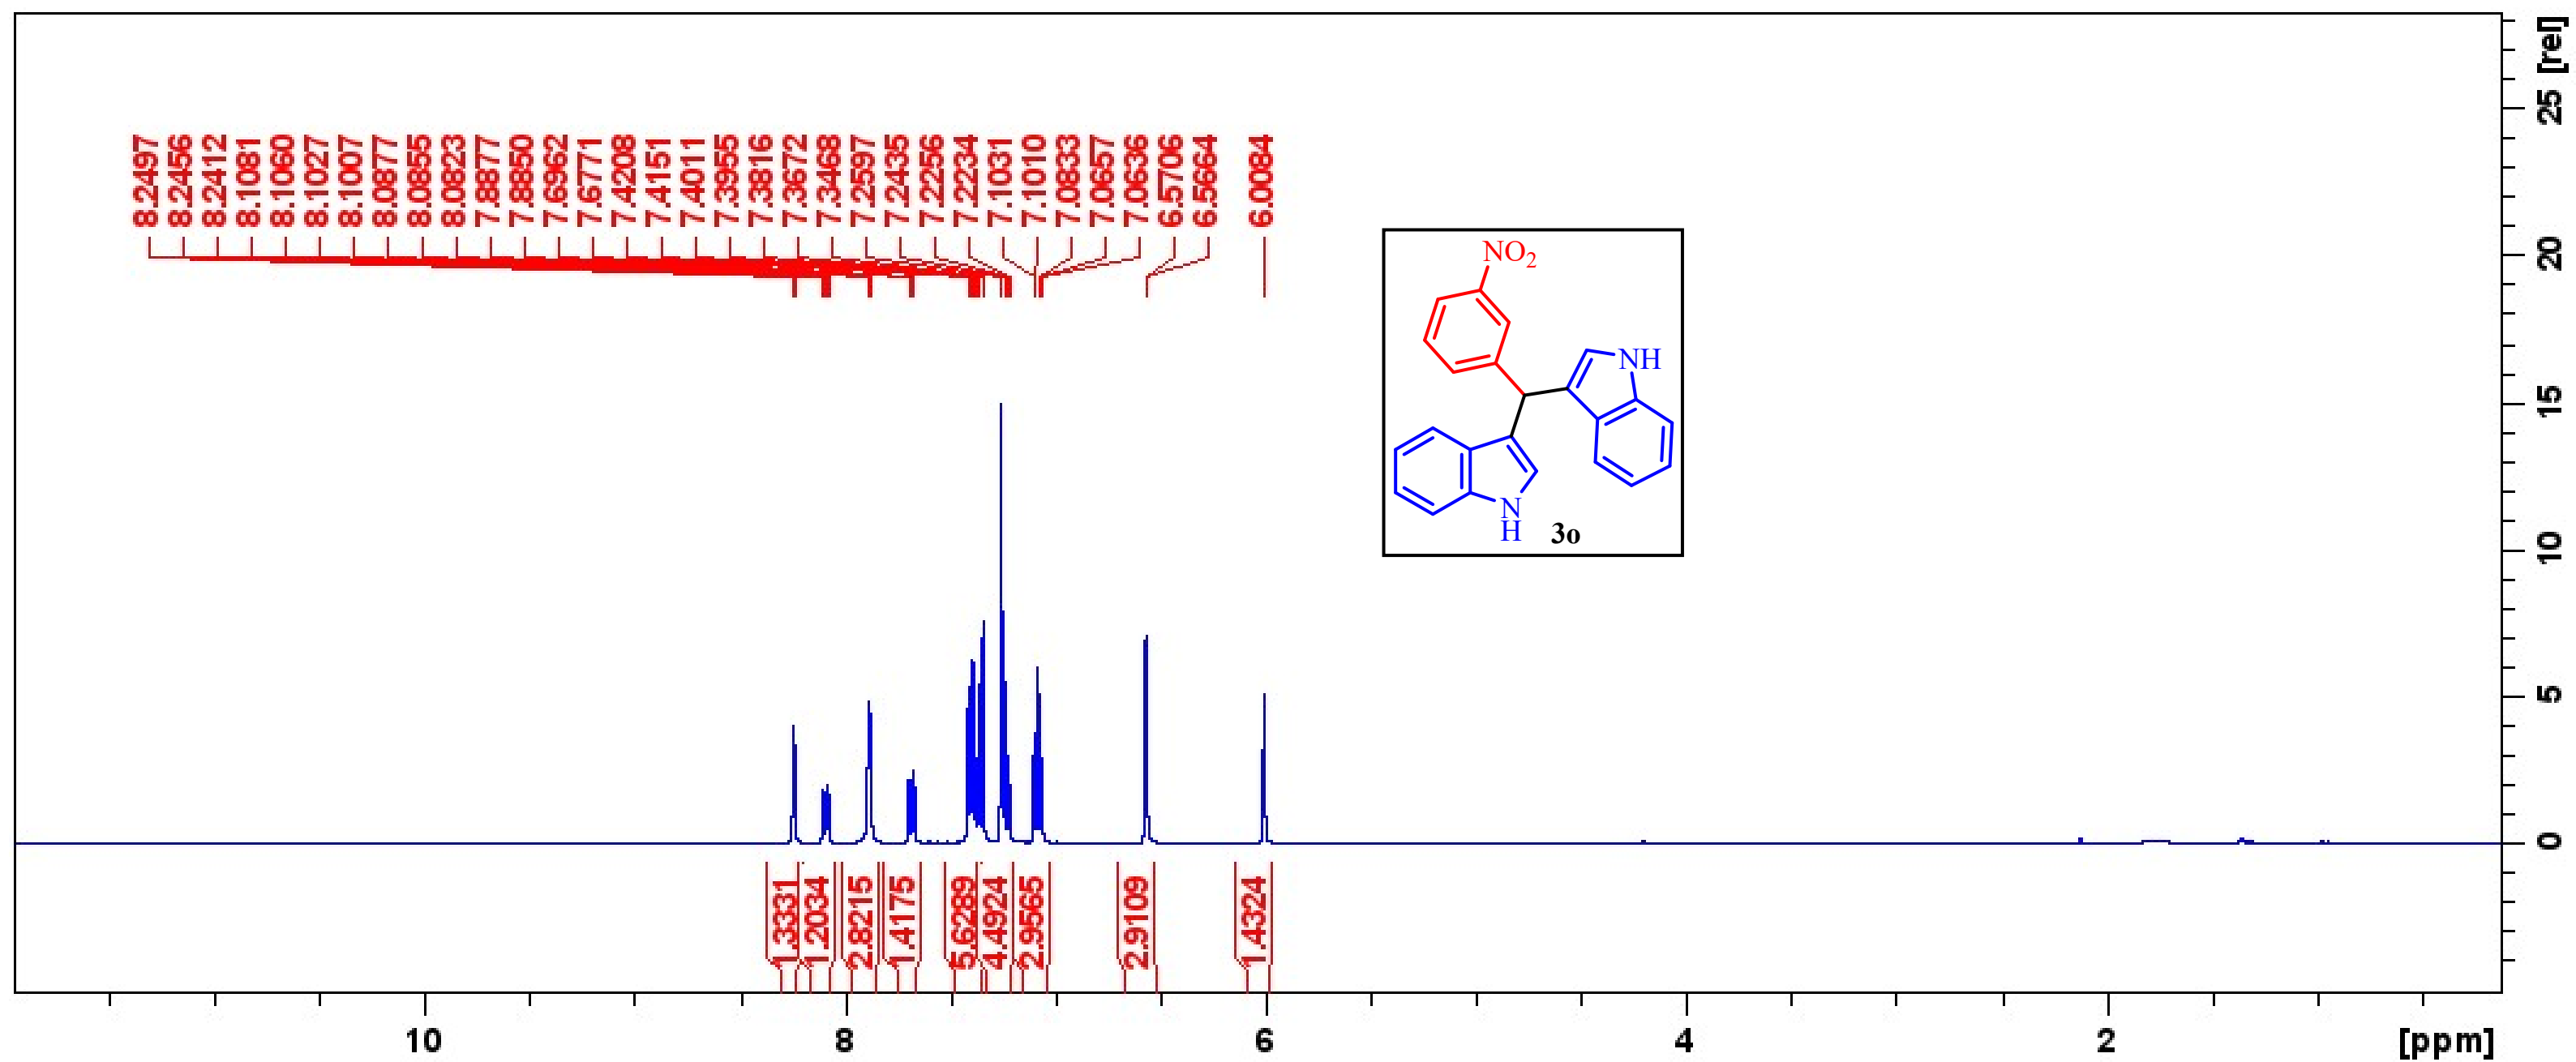

Figure 42. <sup>1</sup>H NMR spectrum of compound **3o**

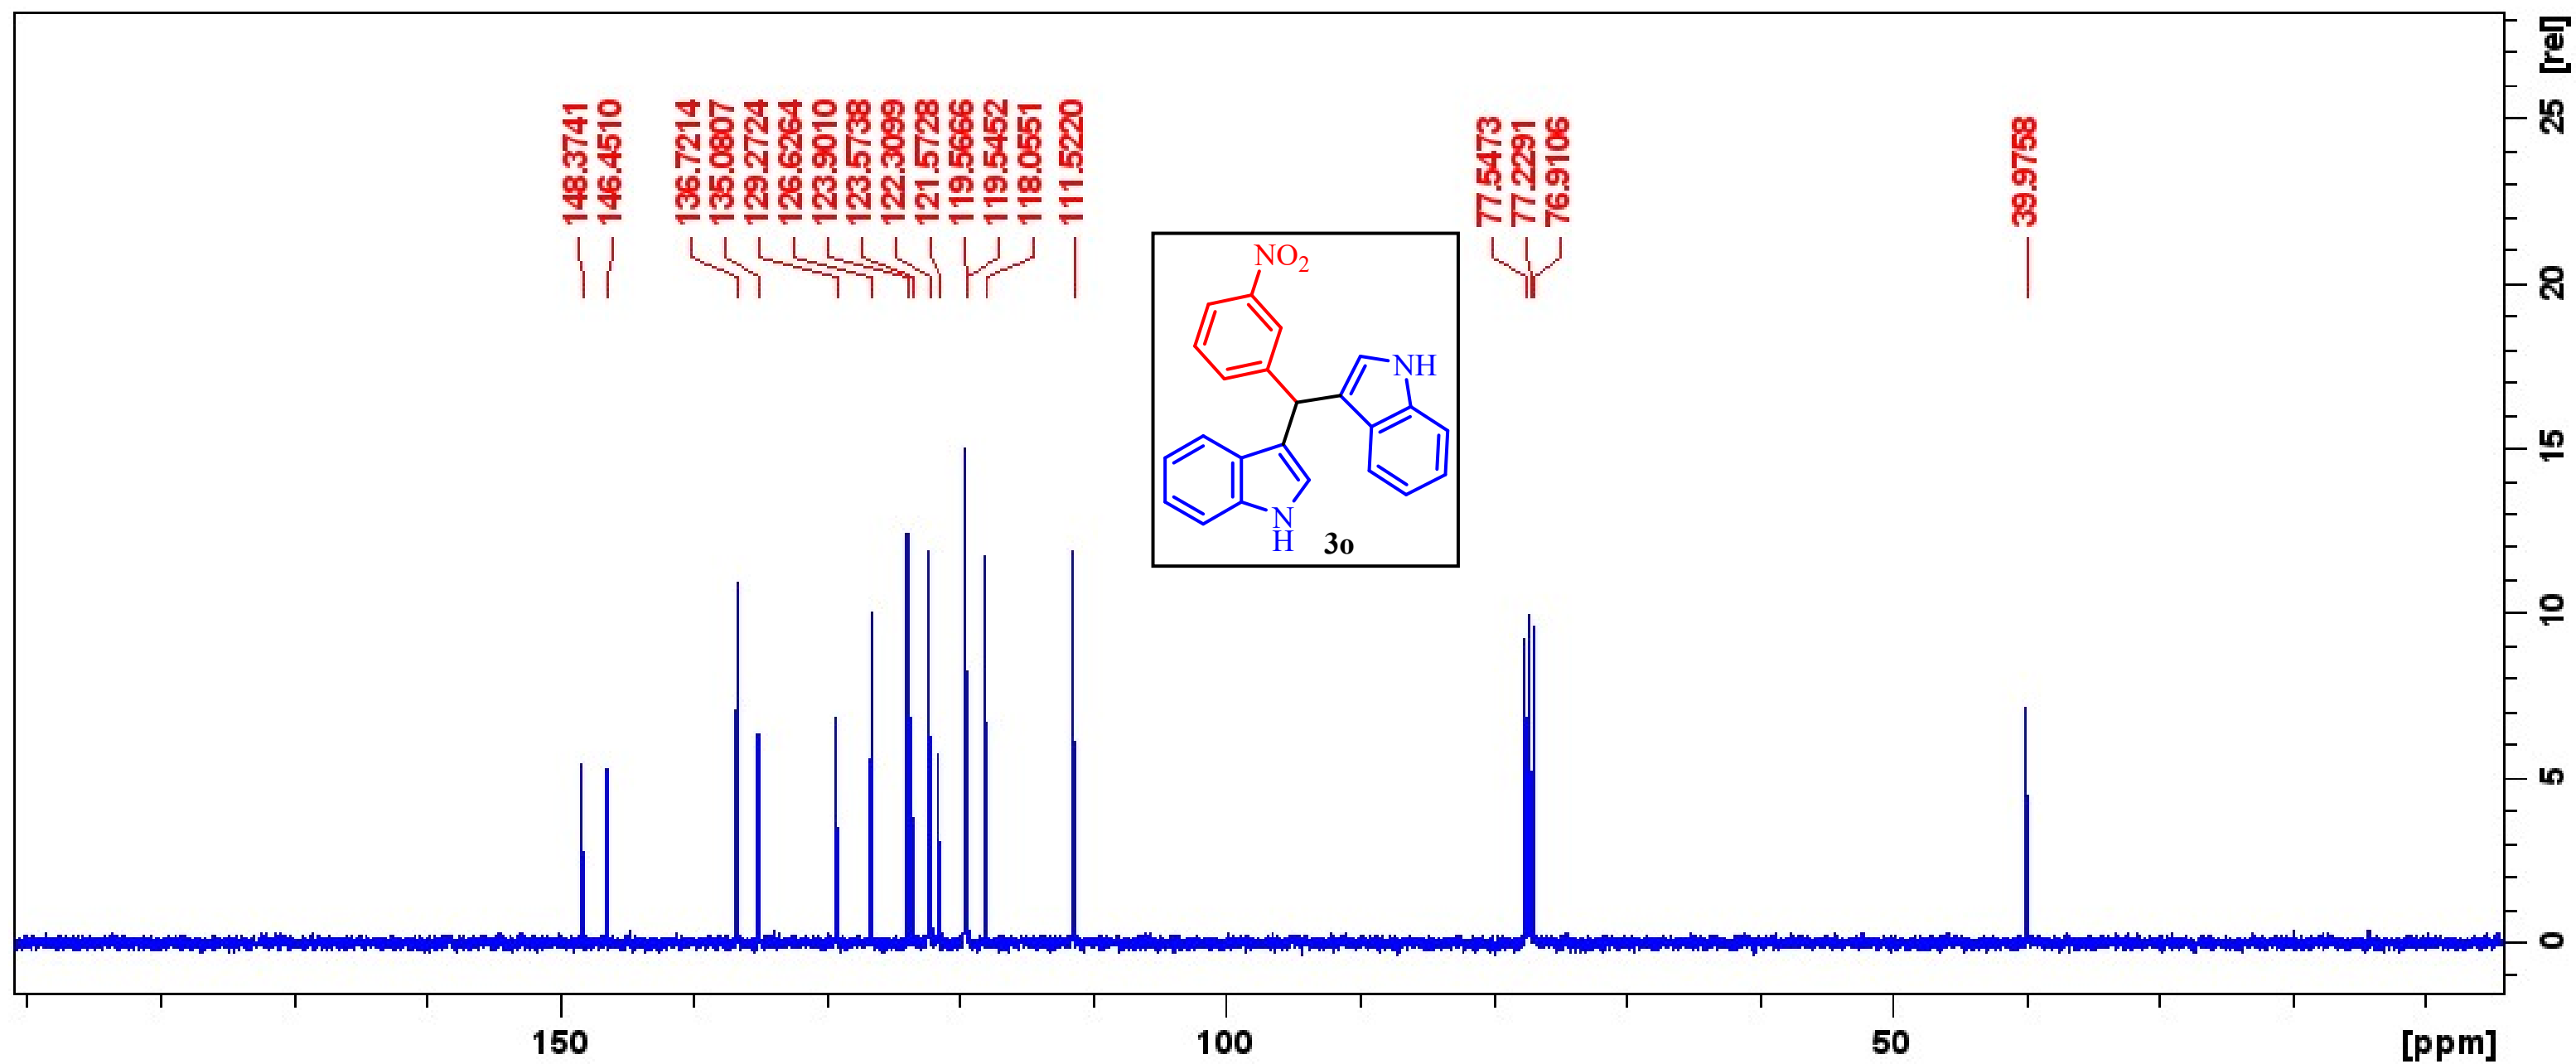

Figure 43.  $^{13}\text{C}$  NMR spectrum of compound **3o**

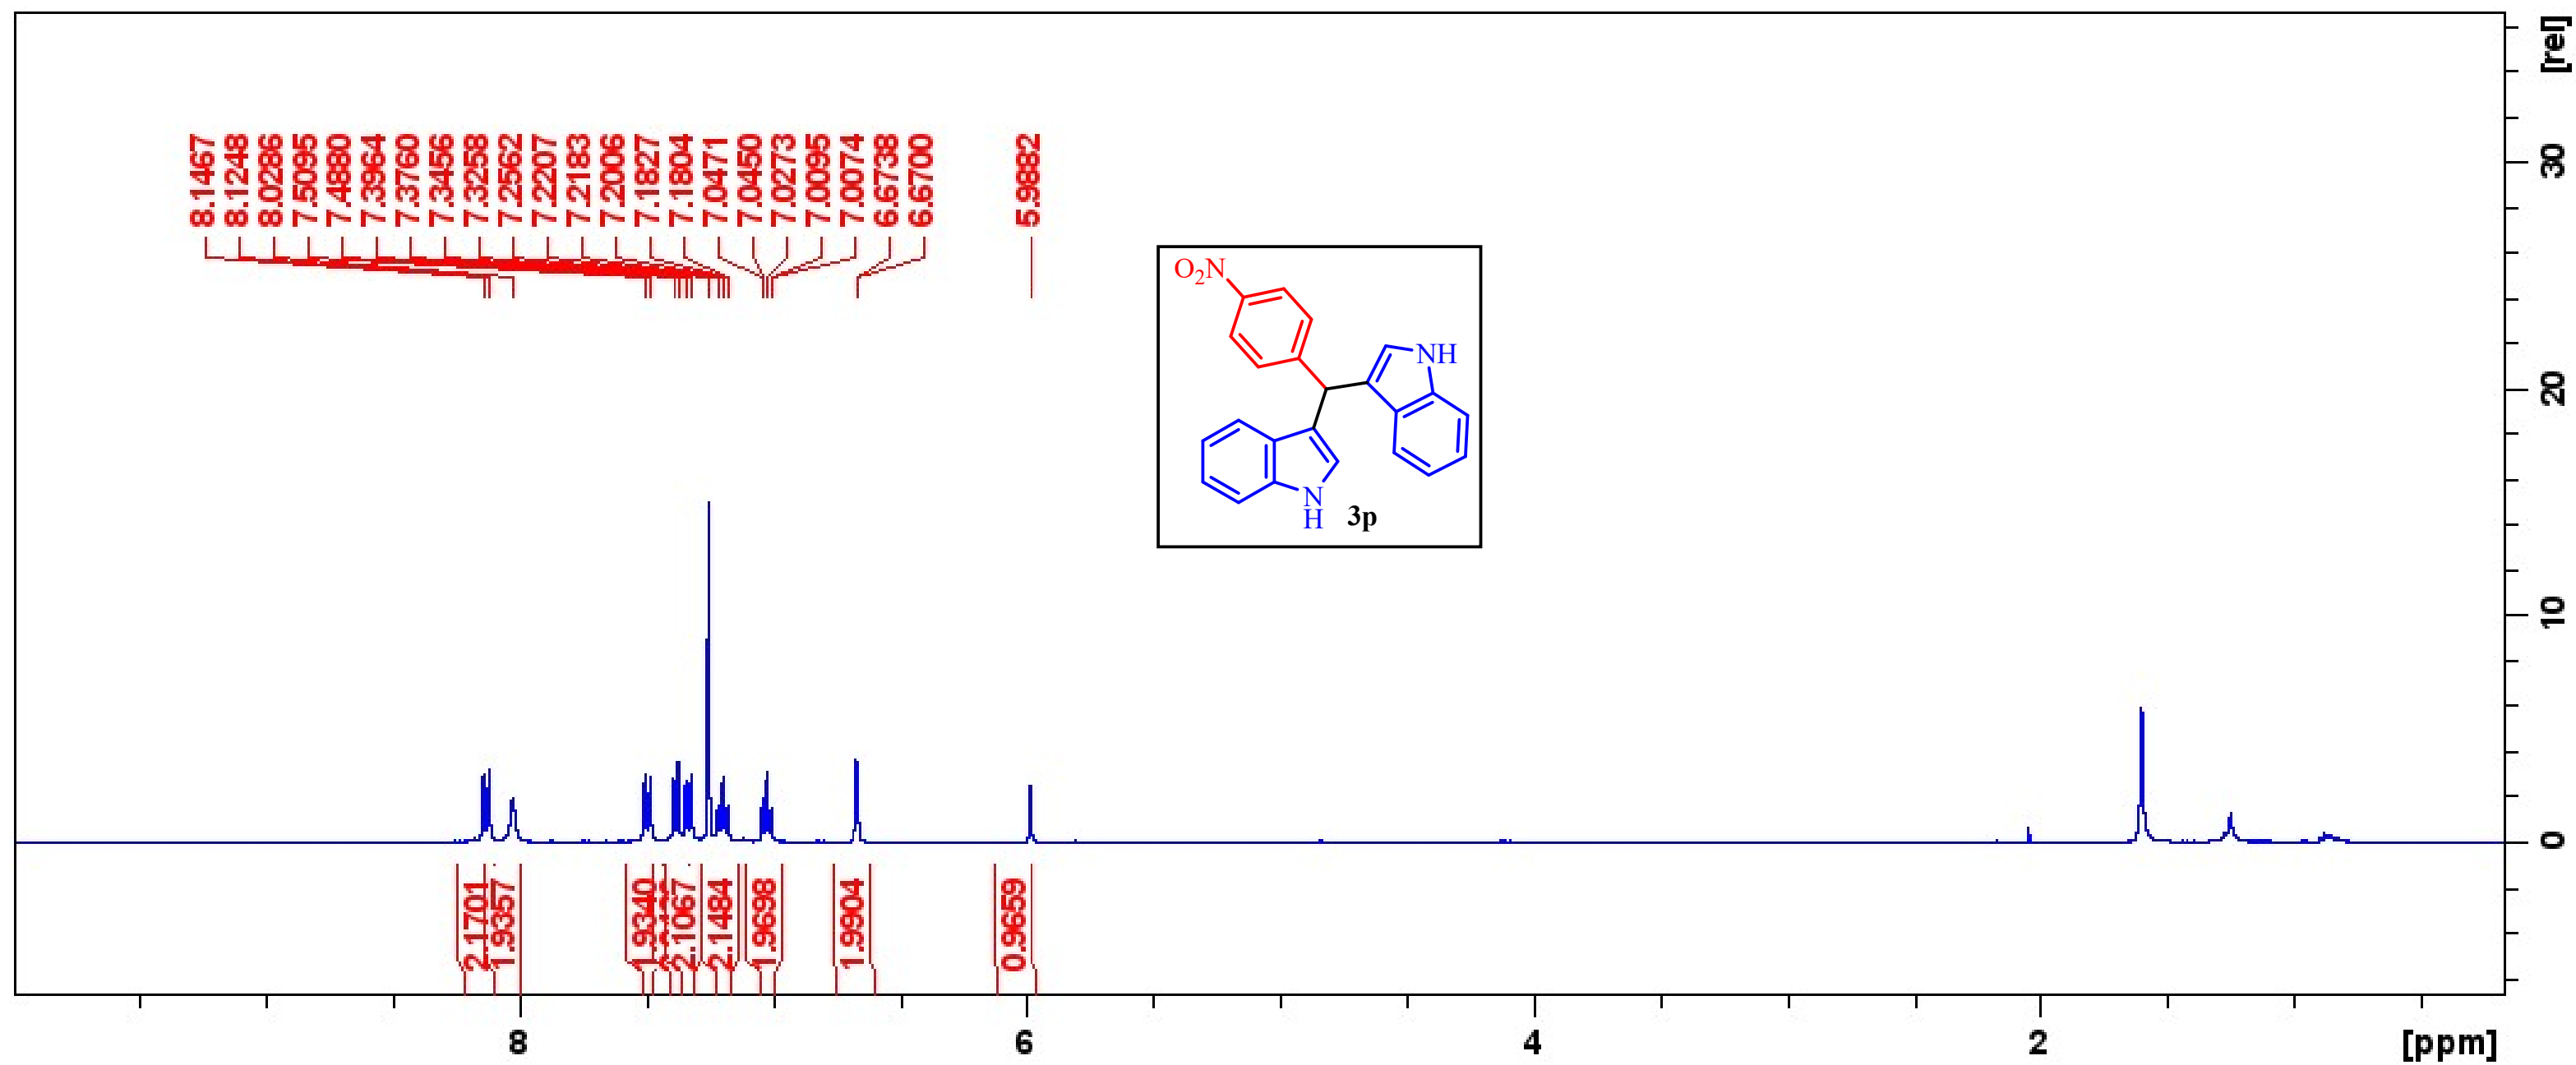

Figure 44.  $^1\text{H}$  NMR spectrum of compound **3p**

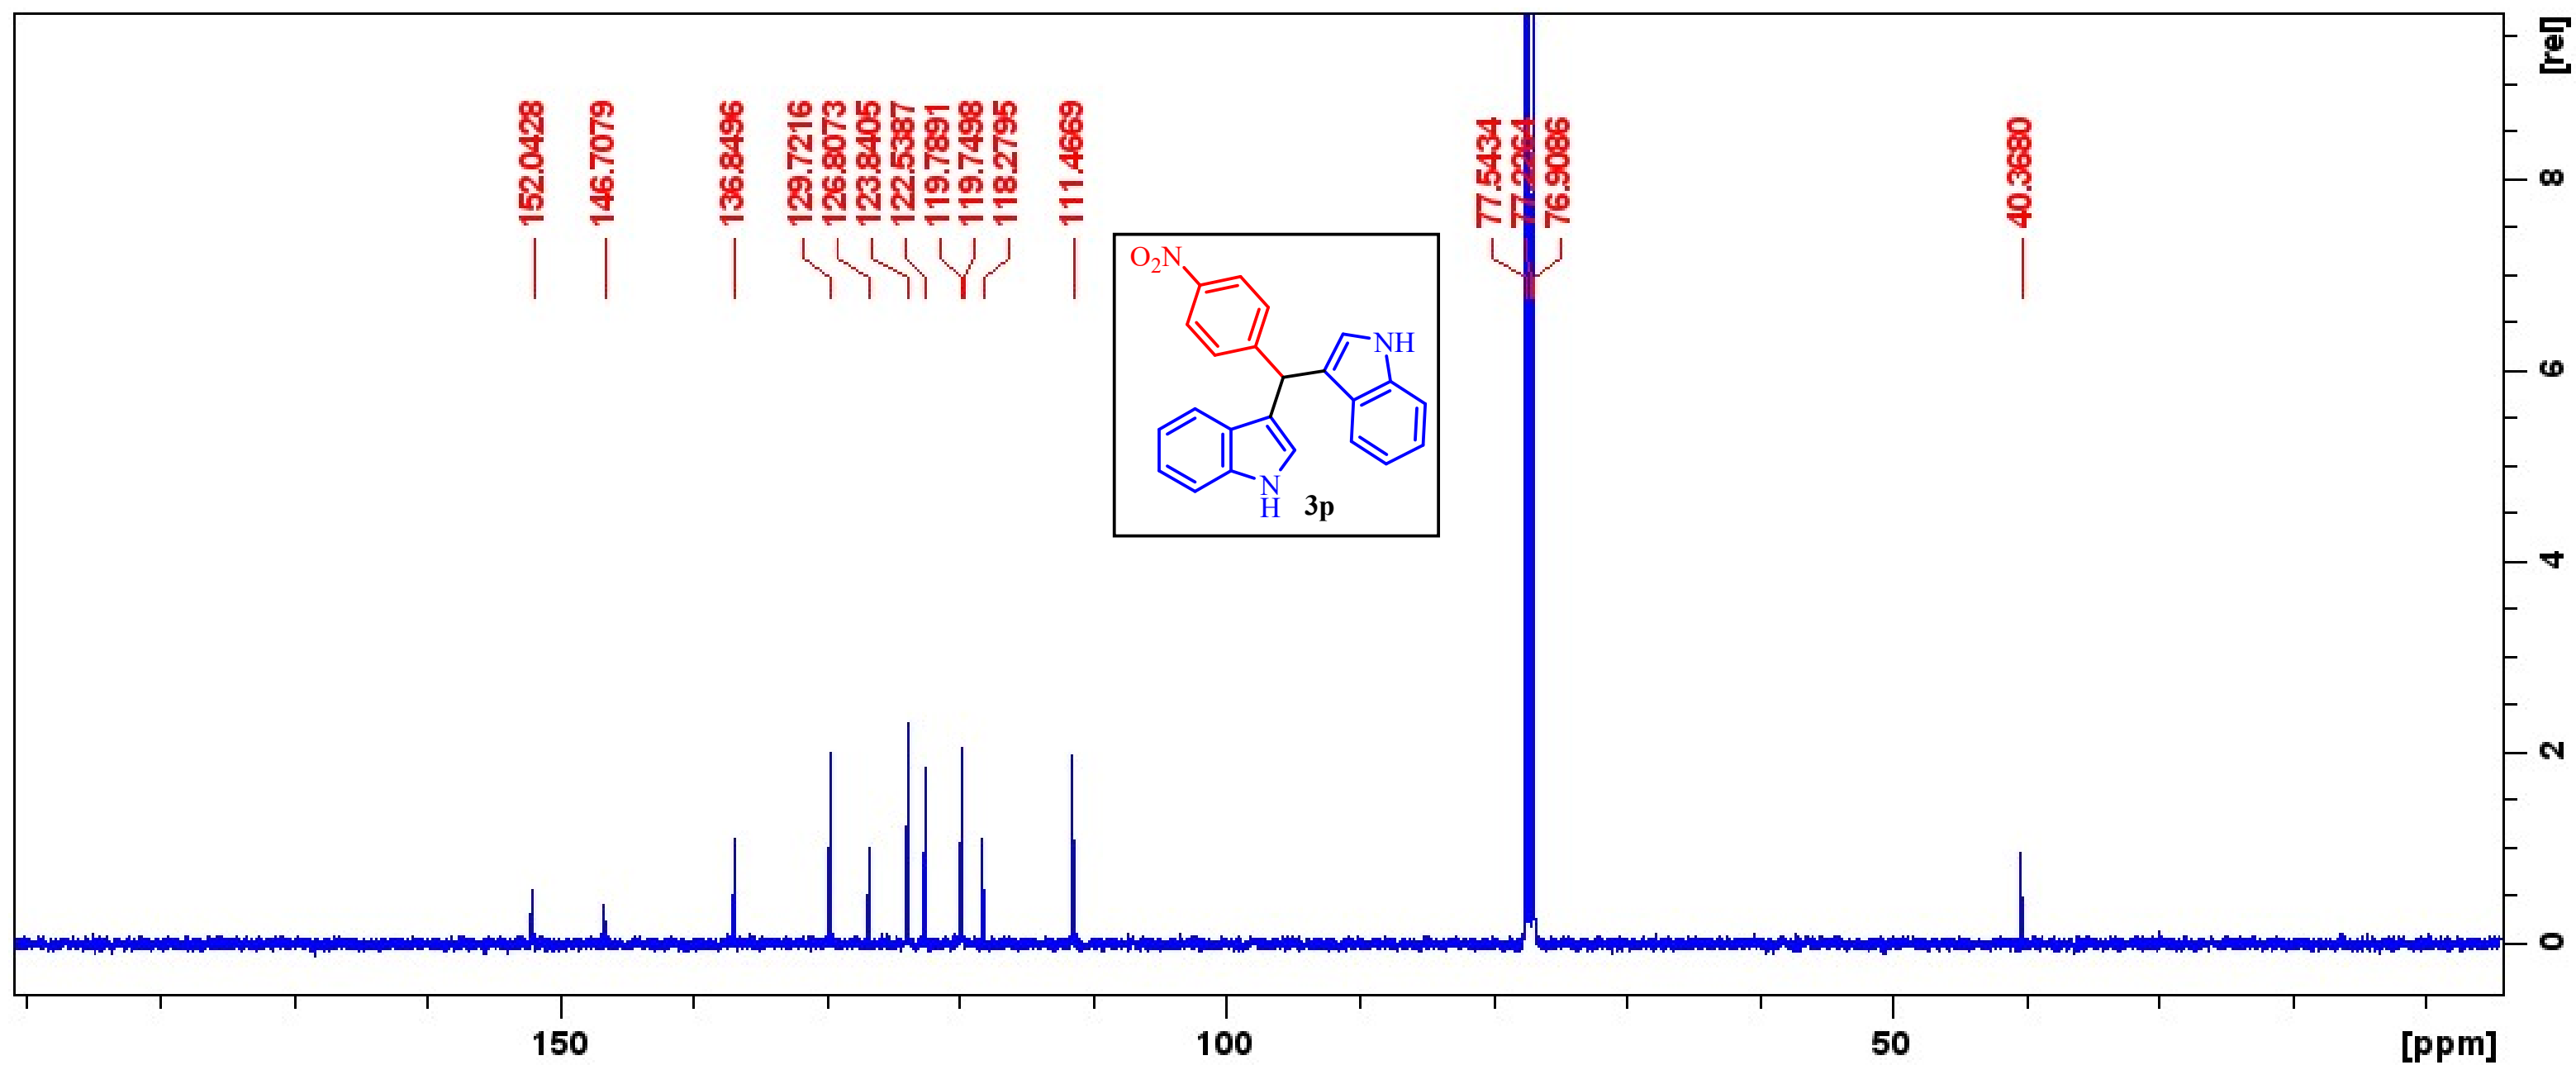

Figure 45.  $^{13}\text{C}$  NMR spectrum of compound **3p**



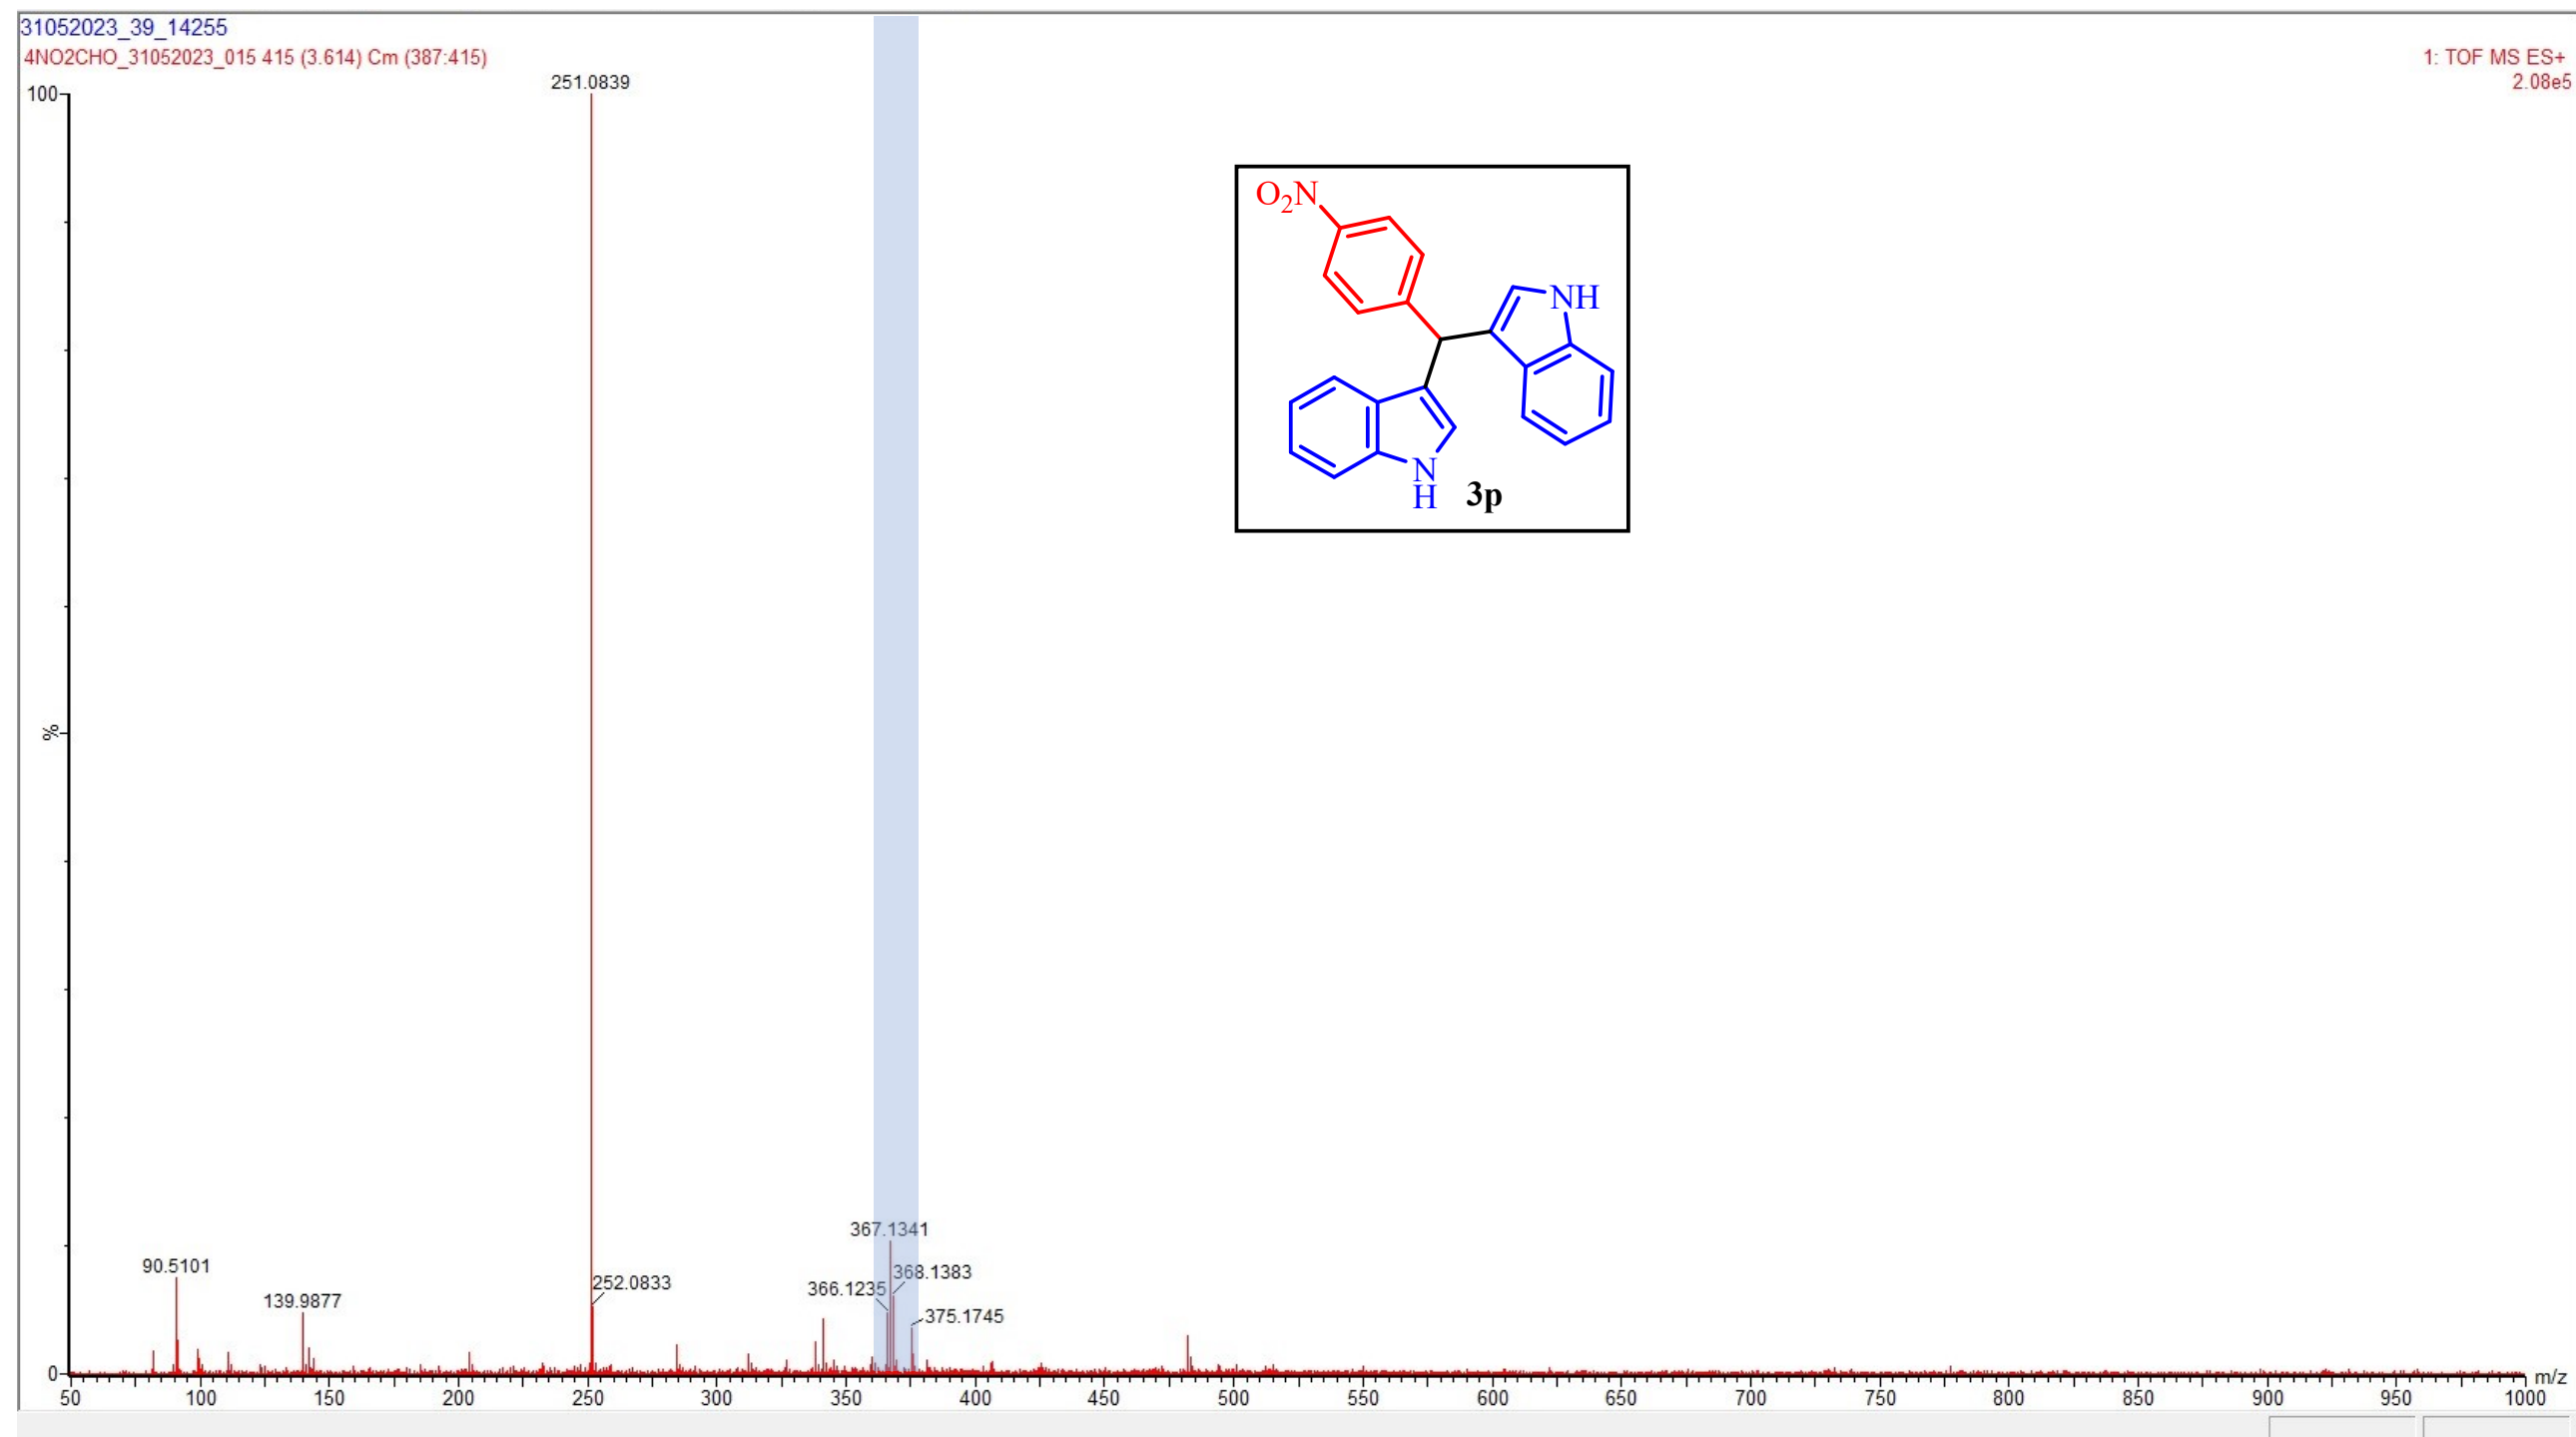

Figure 46. HRMS spectrum of compound **3p**

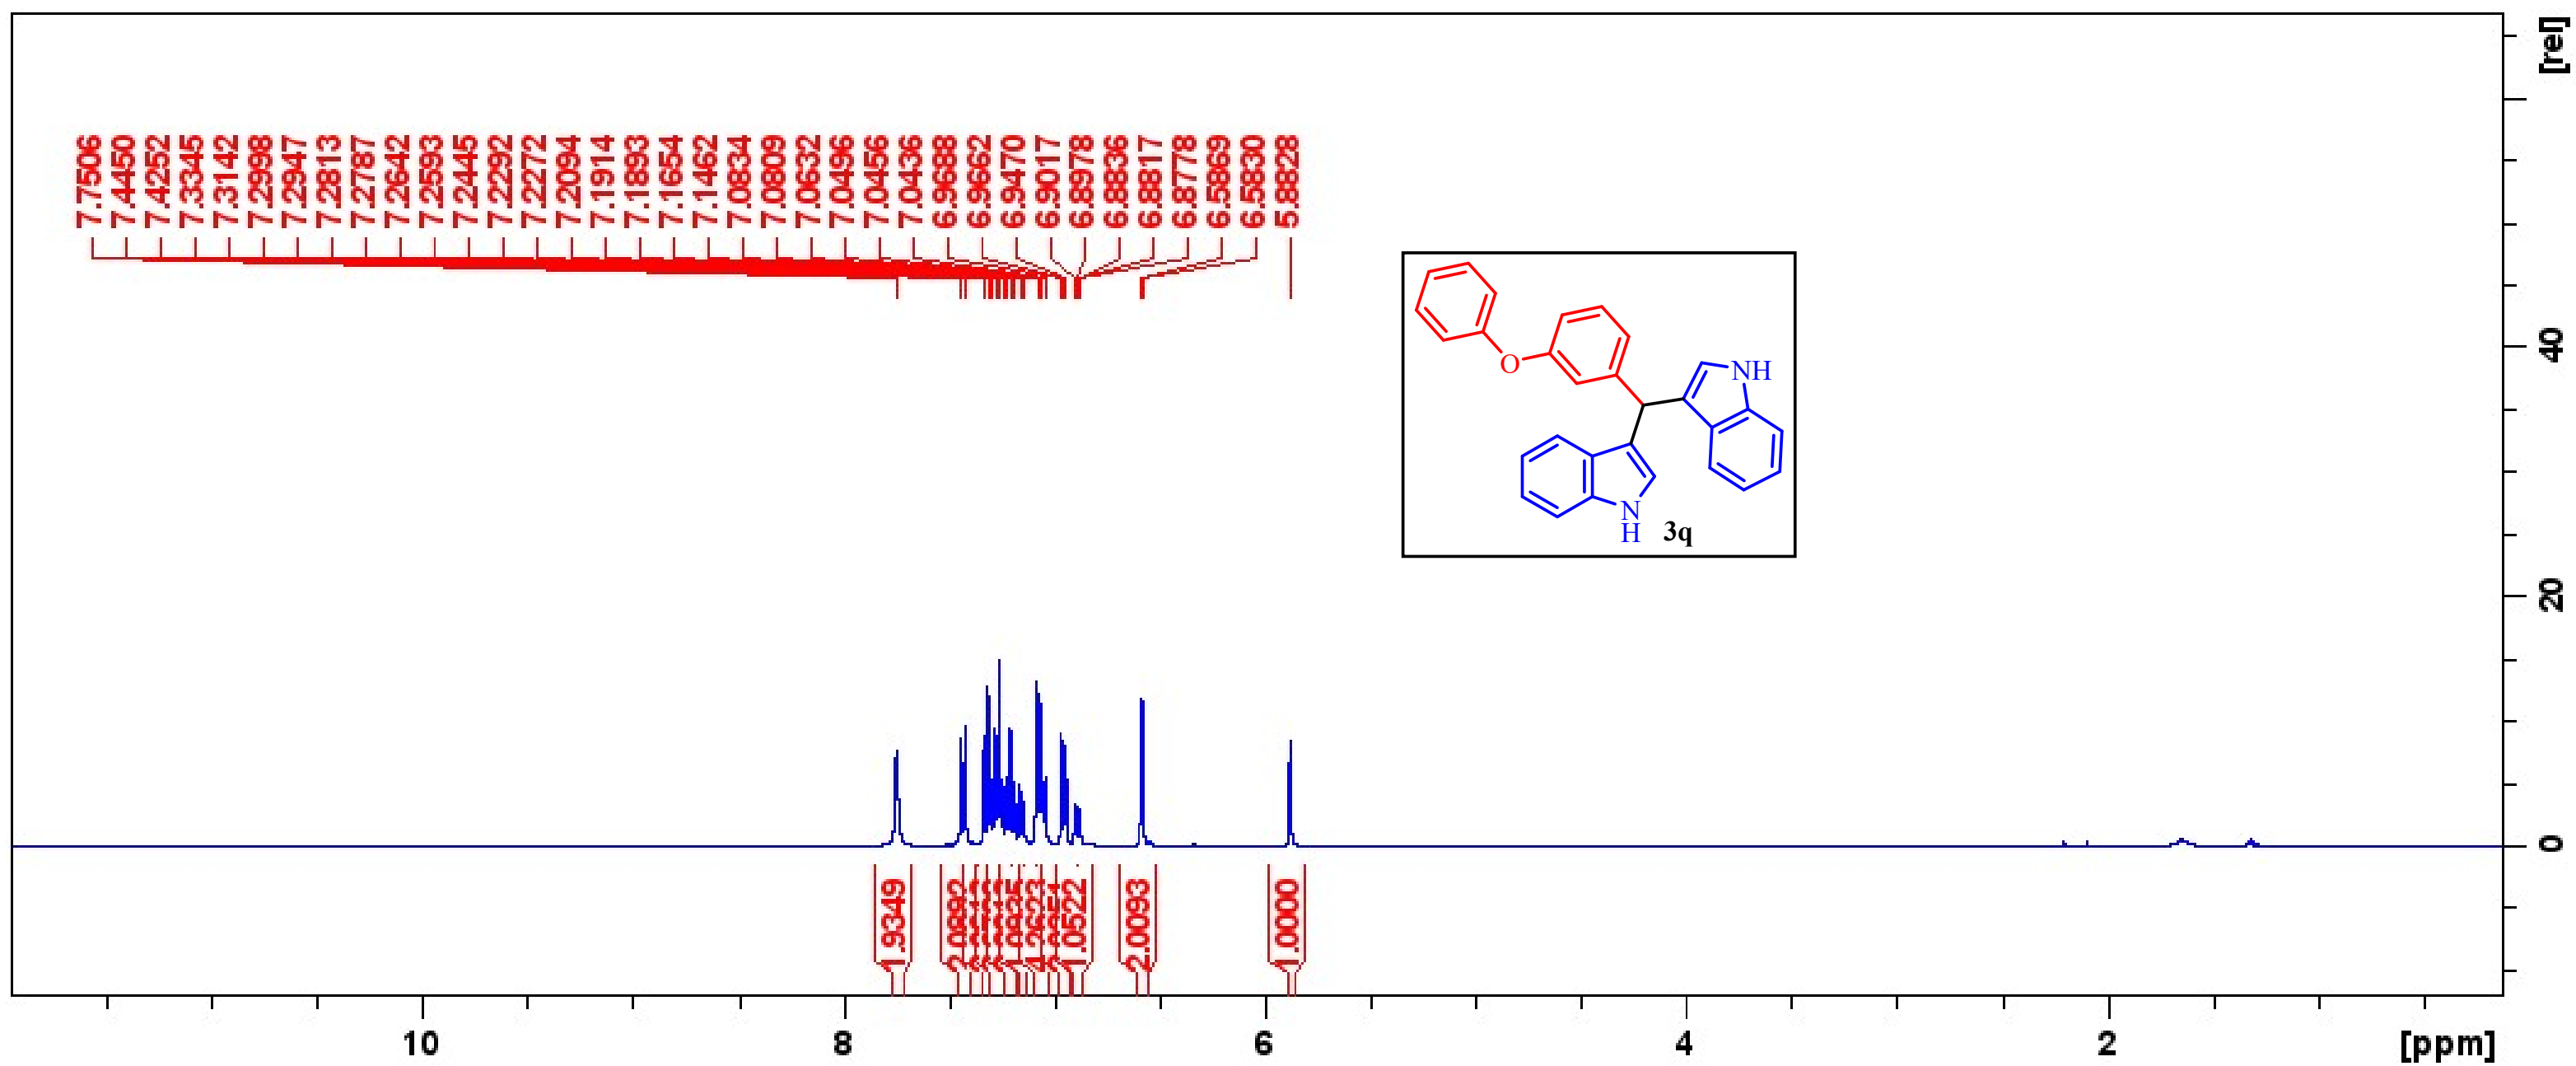

Figure 47.  $^1\text{H}$  NMR spectrum of compound **3q**

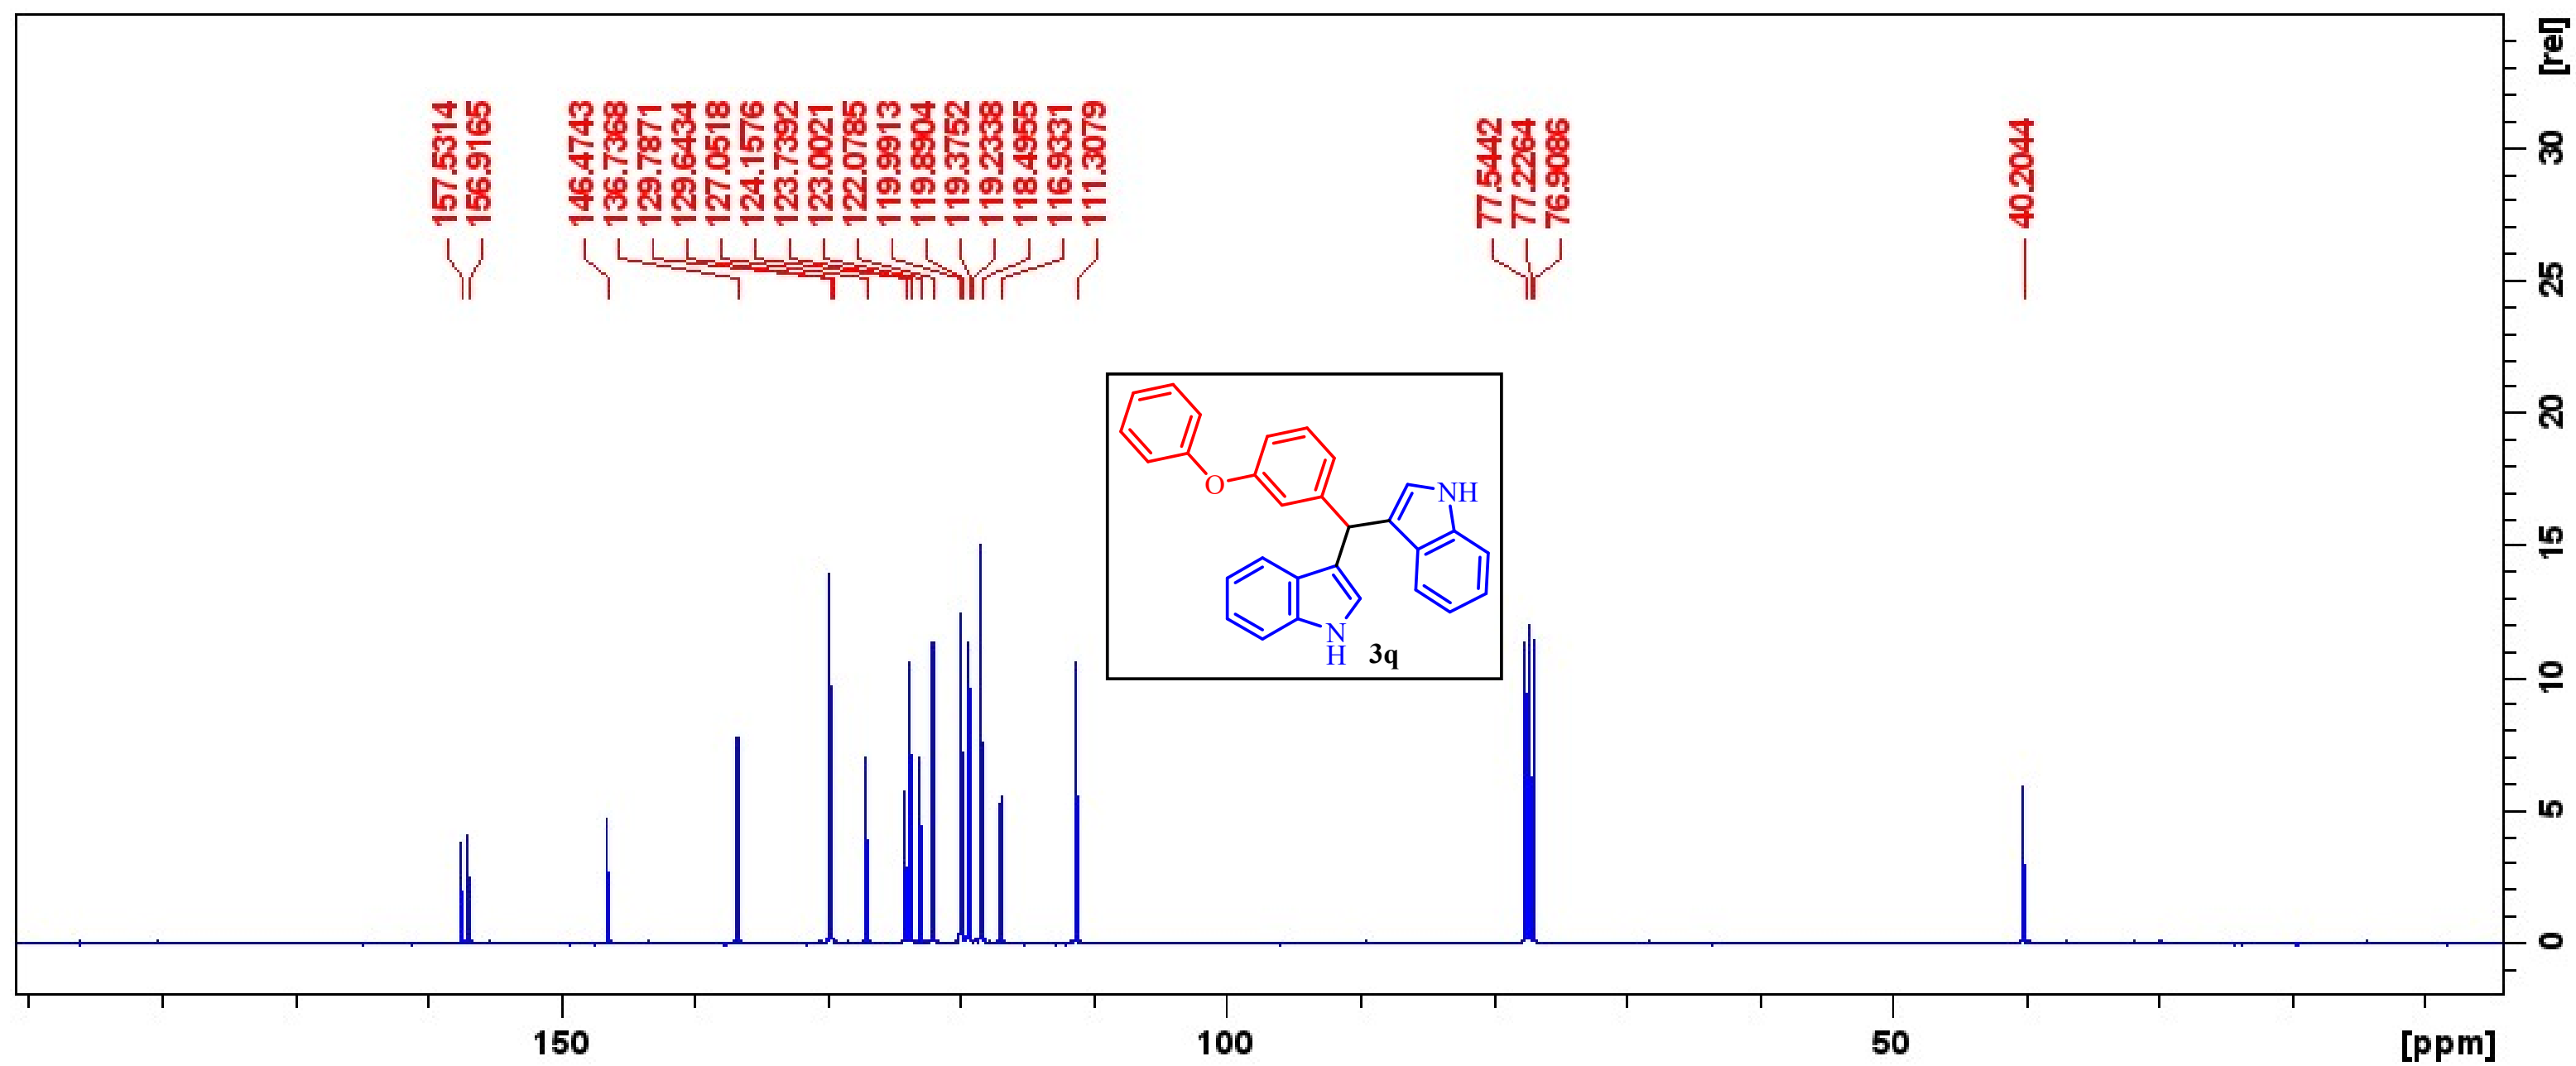

Figure 48.  $^{13}\text{C}$  NMR spectrum of compound **3q**

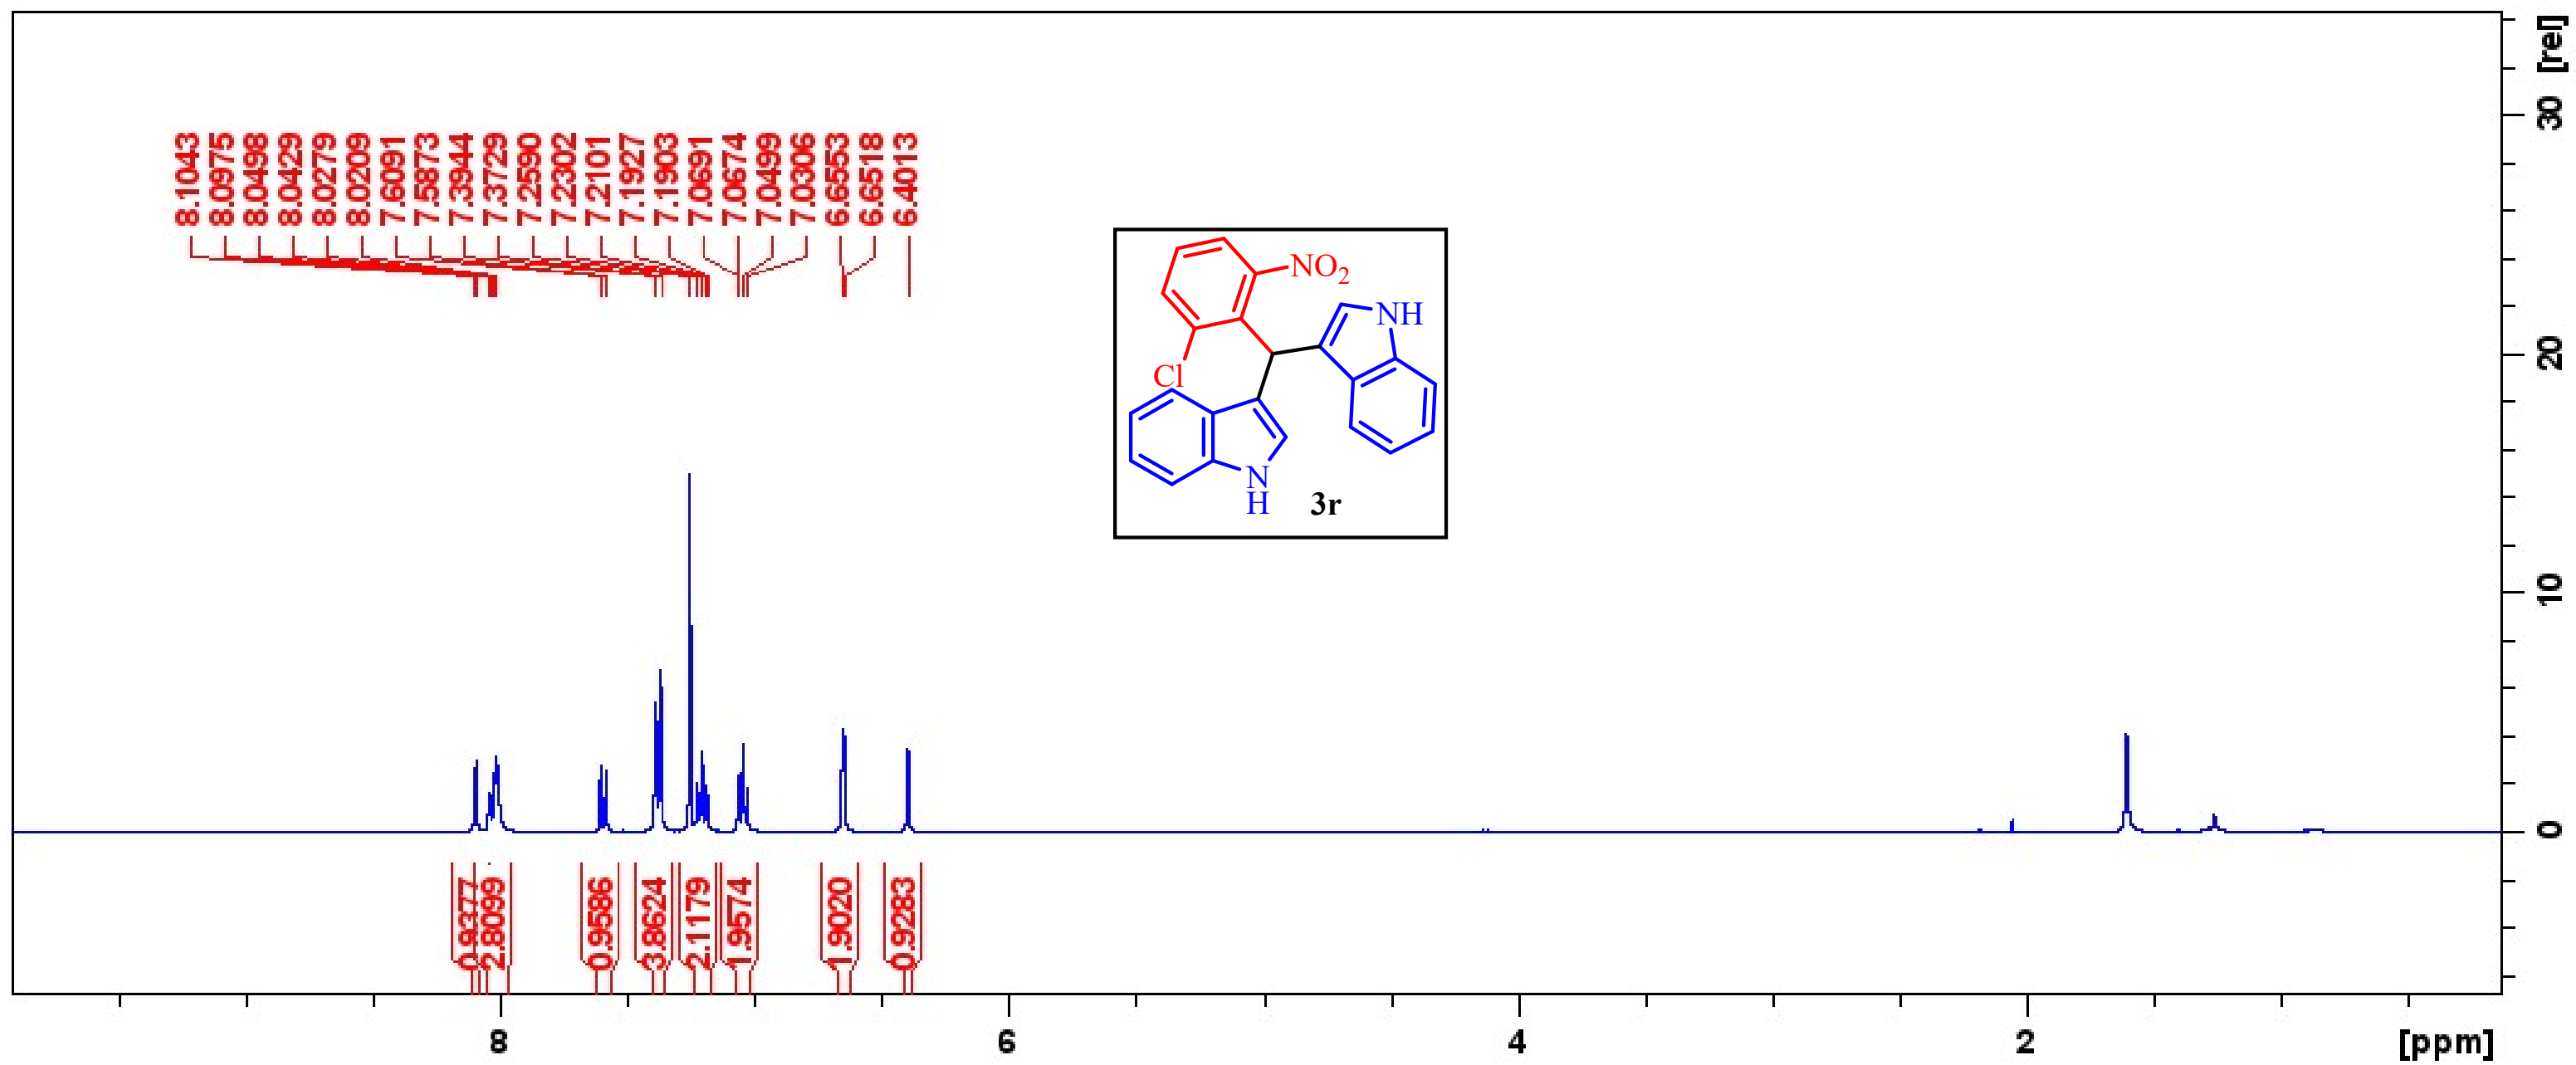

Figure 49. <sup>1</sup>H NMR spectrum of compound **3r**

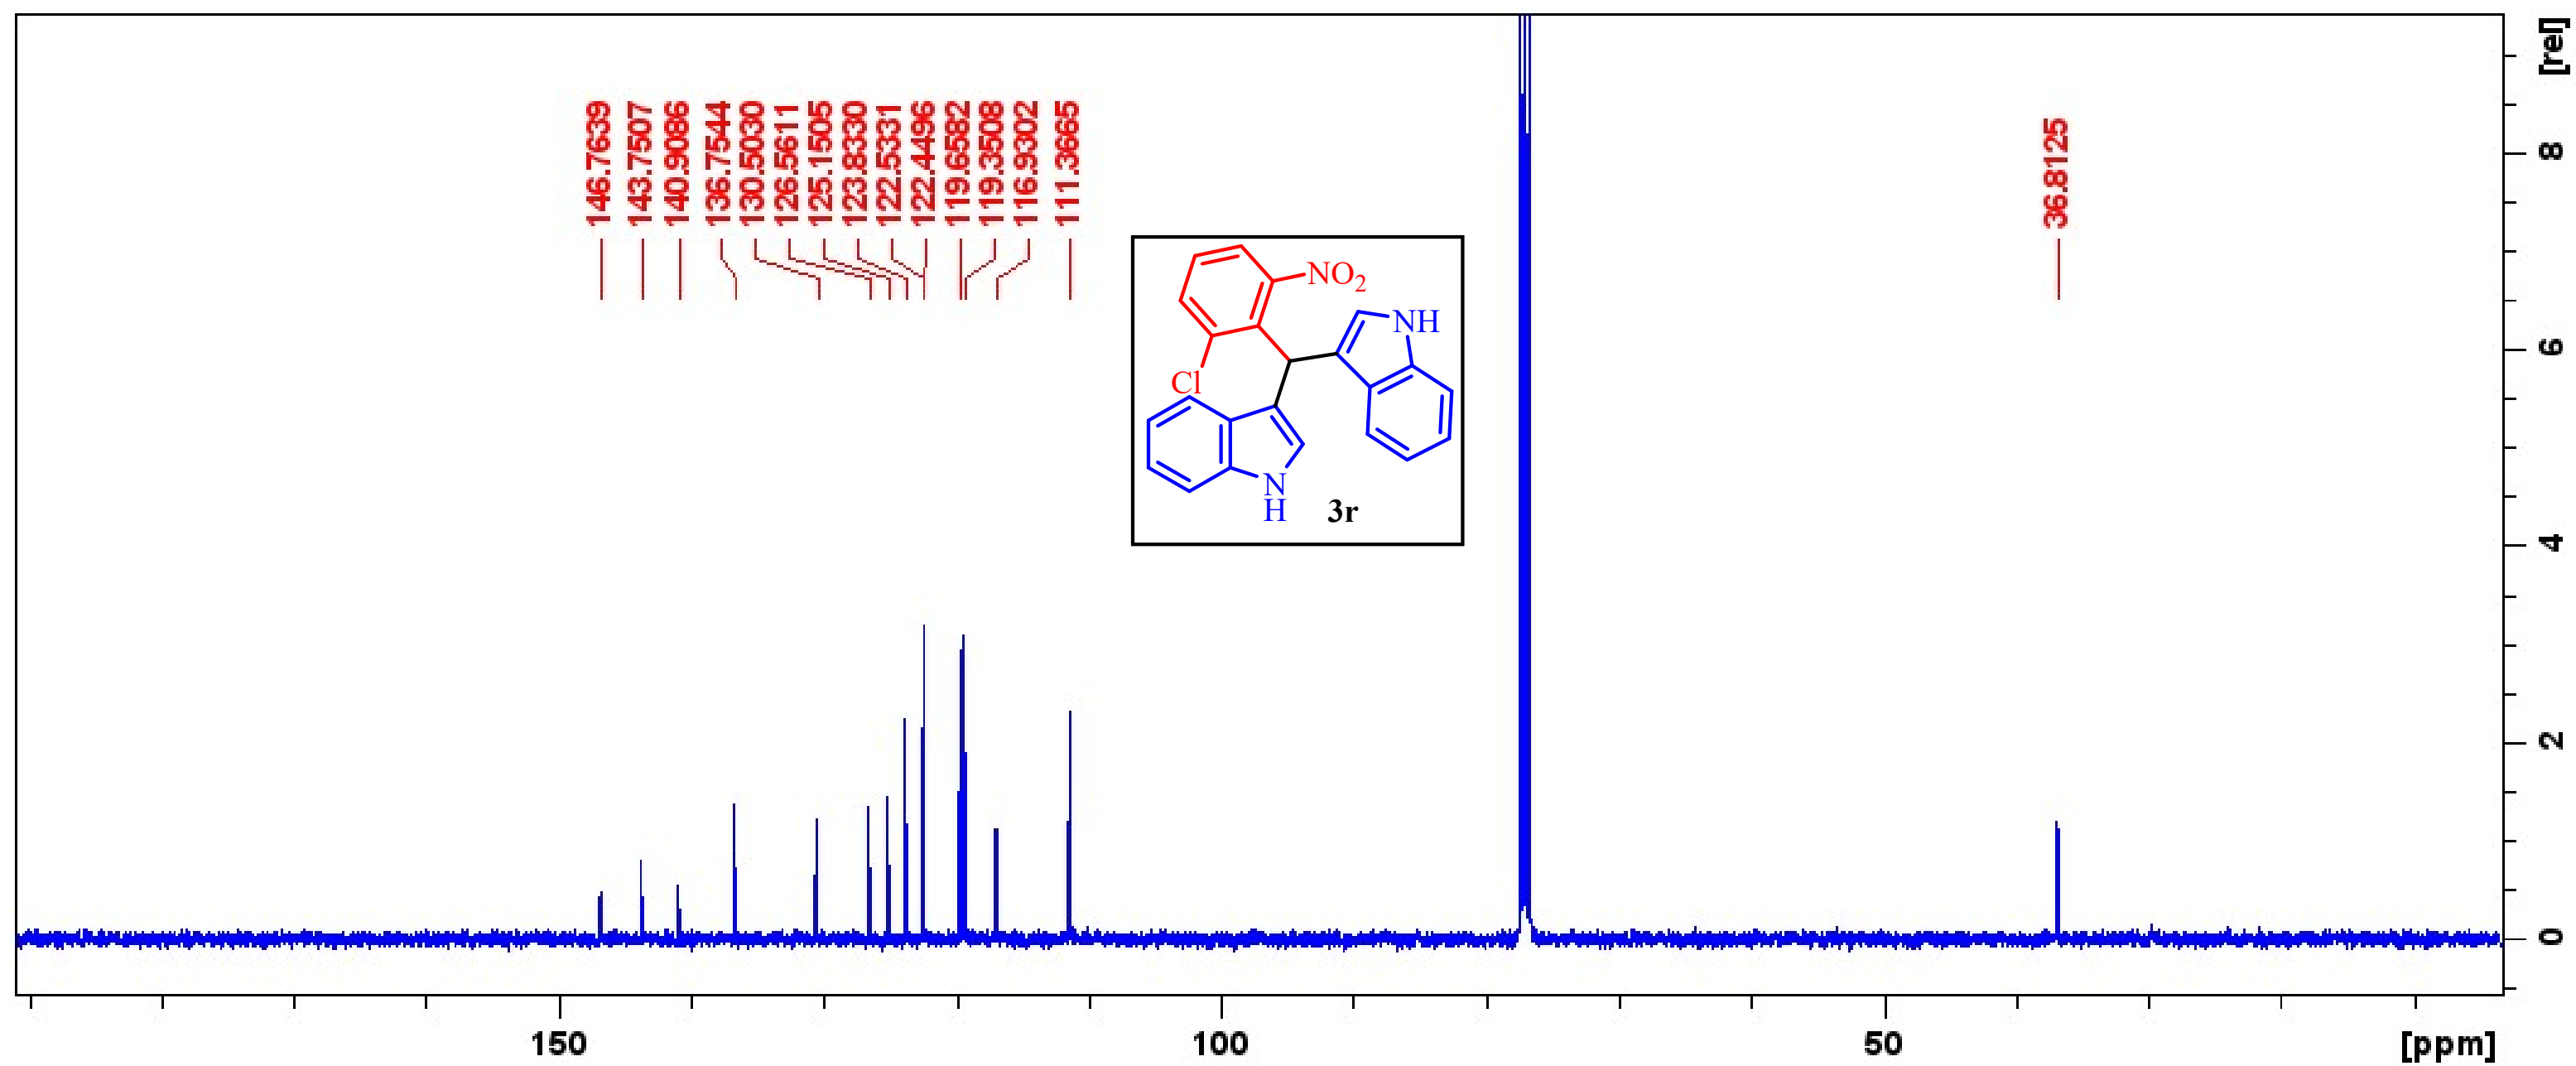

Figure 50. <sup>13</sup>C NMR spectrum of compound **3r**

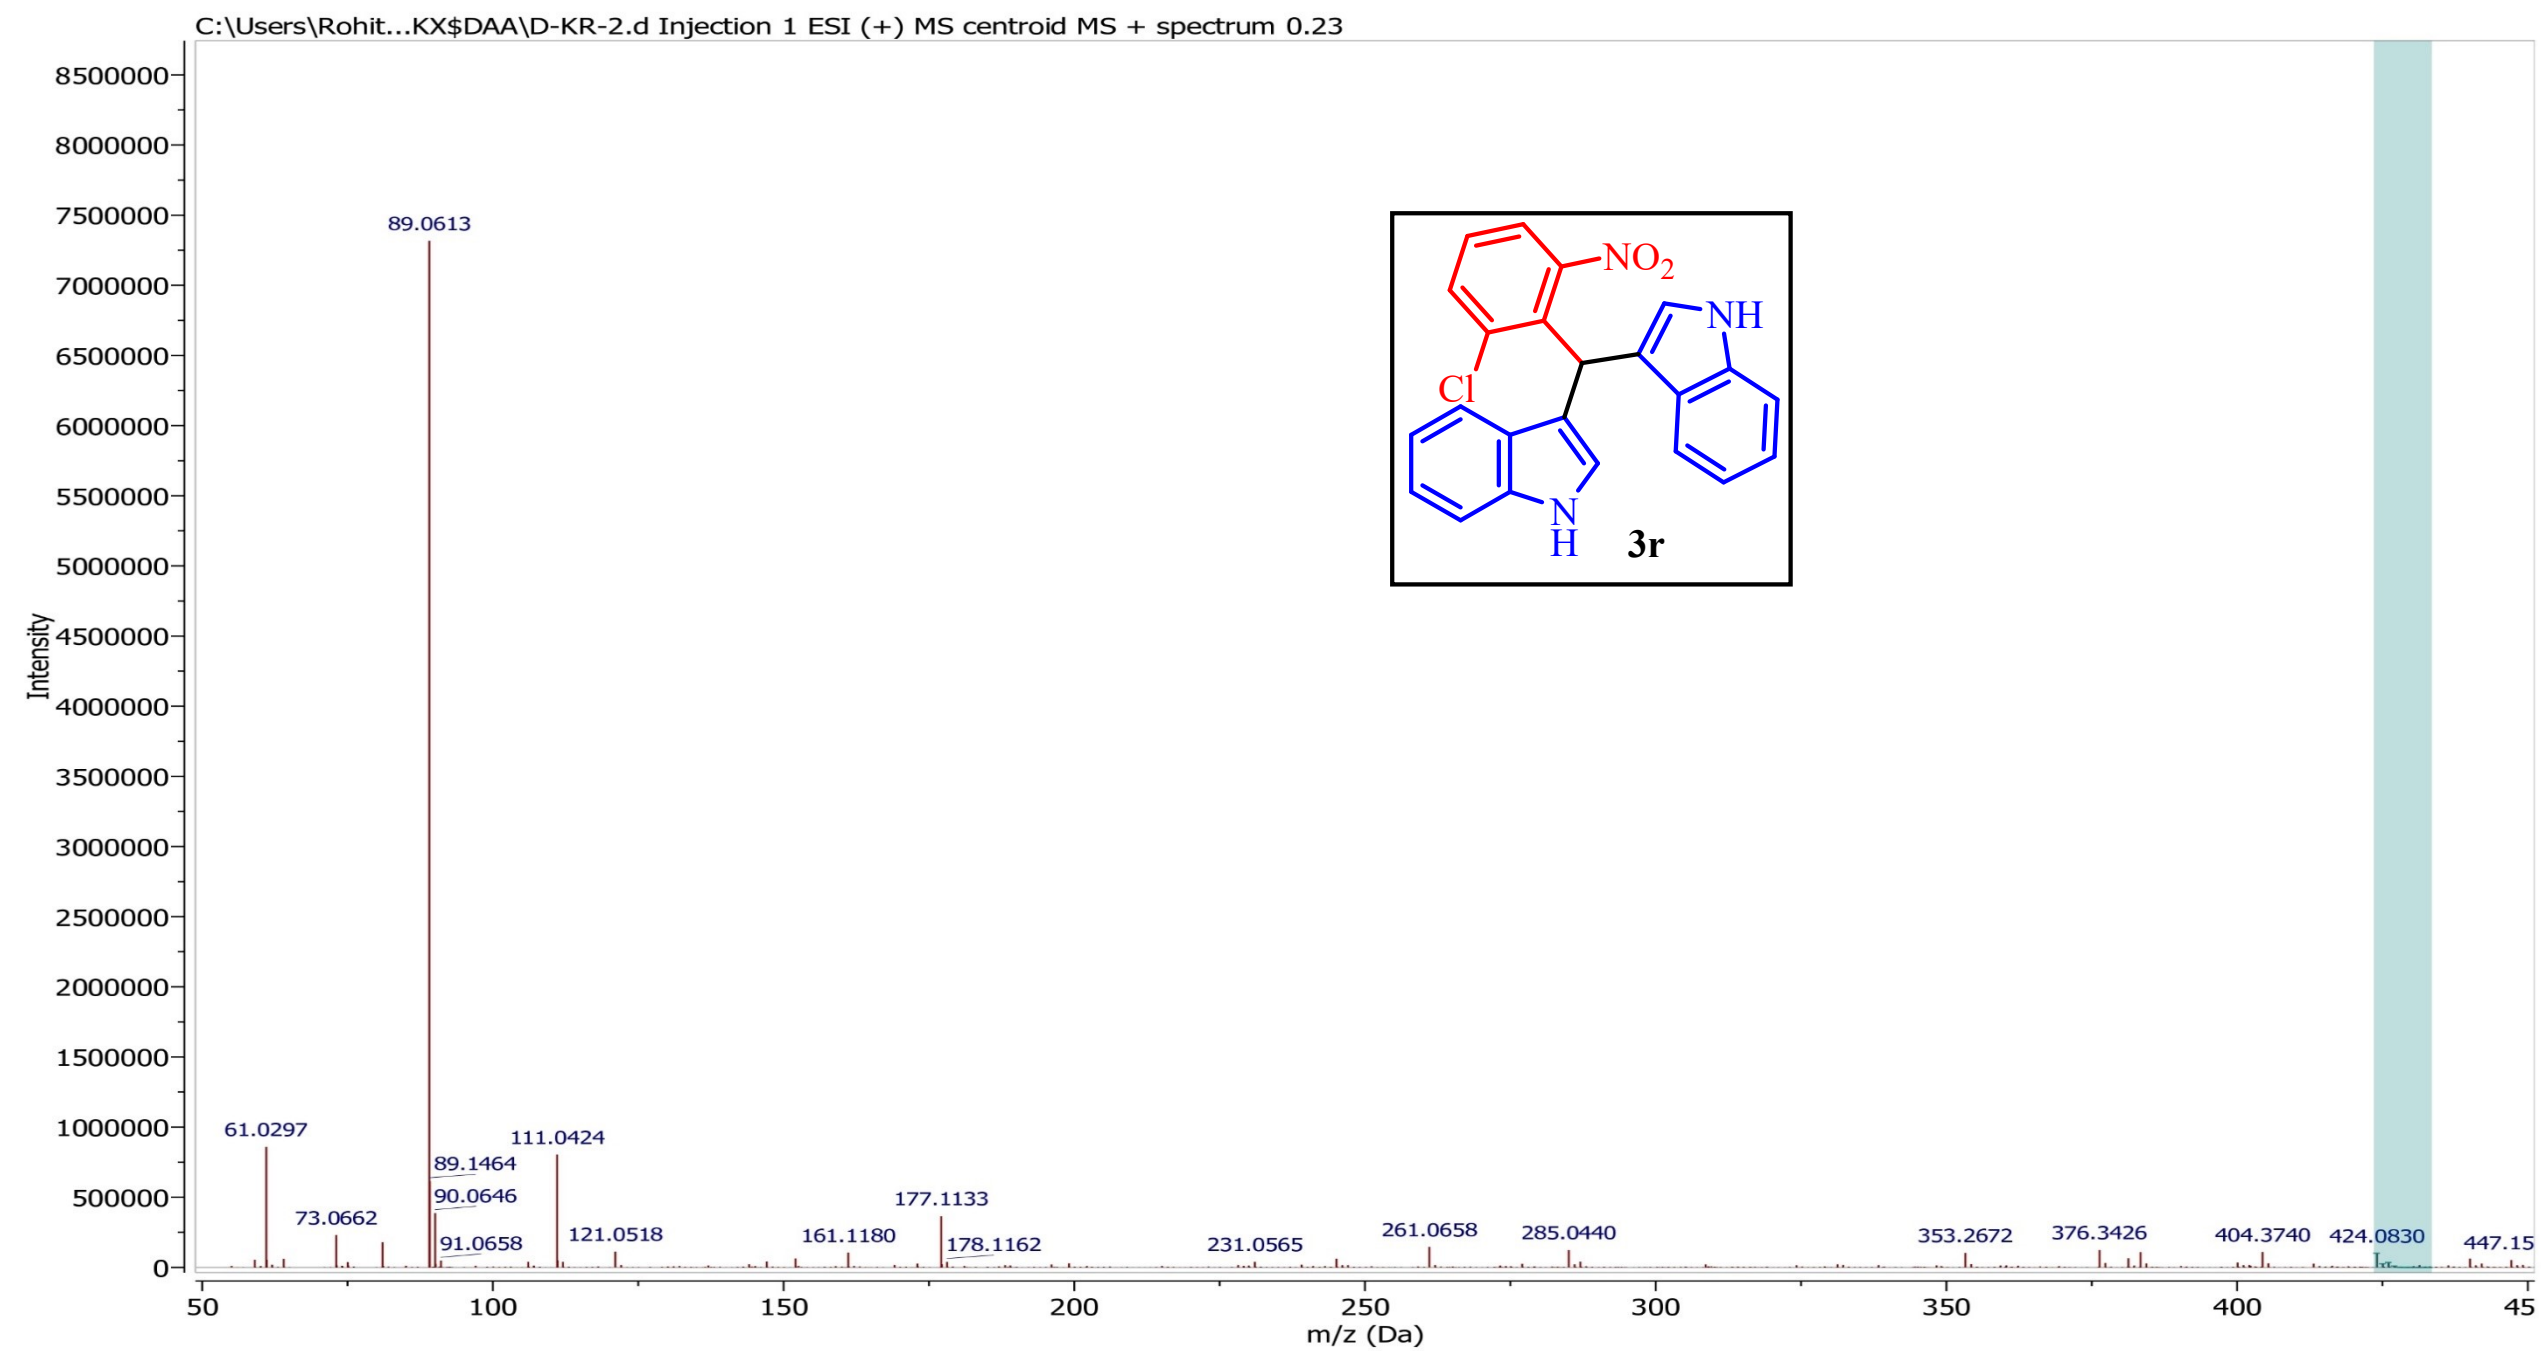

Figure 51. HRMS spectrum of compound **3r**

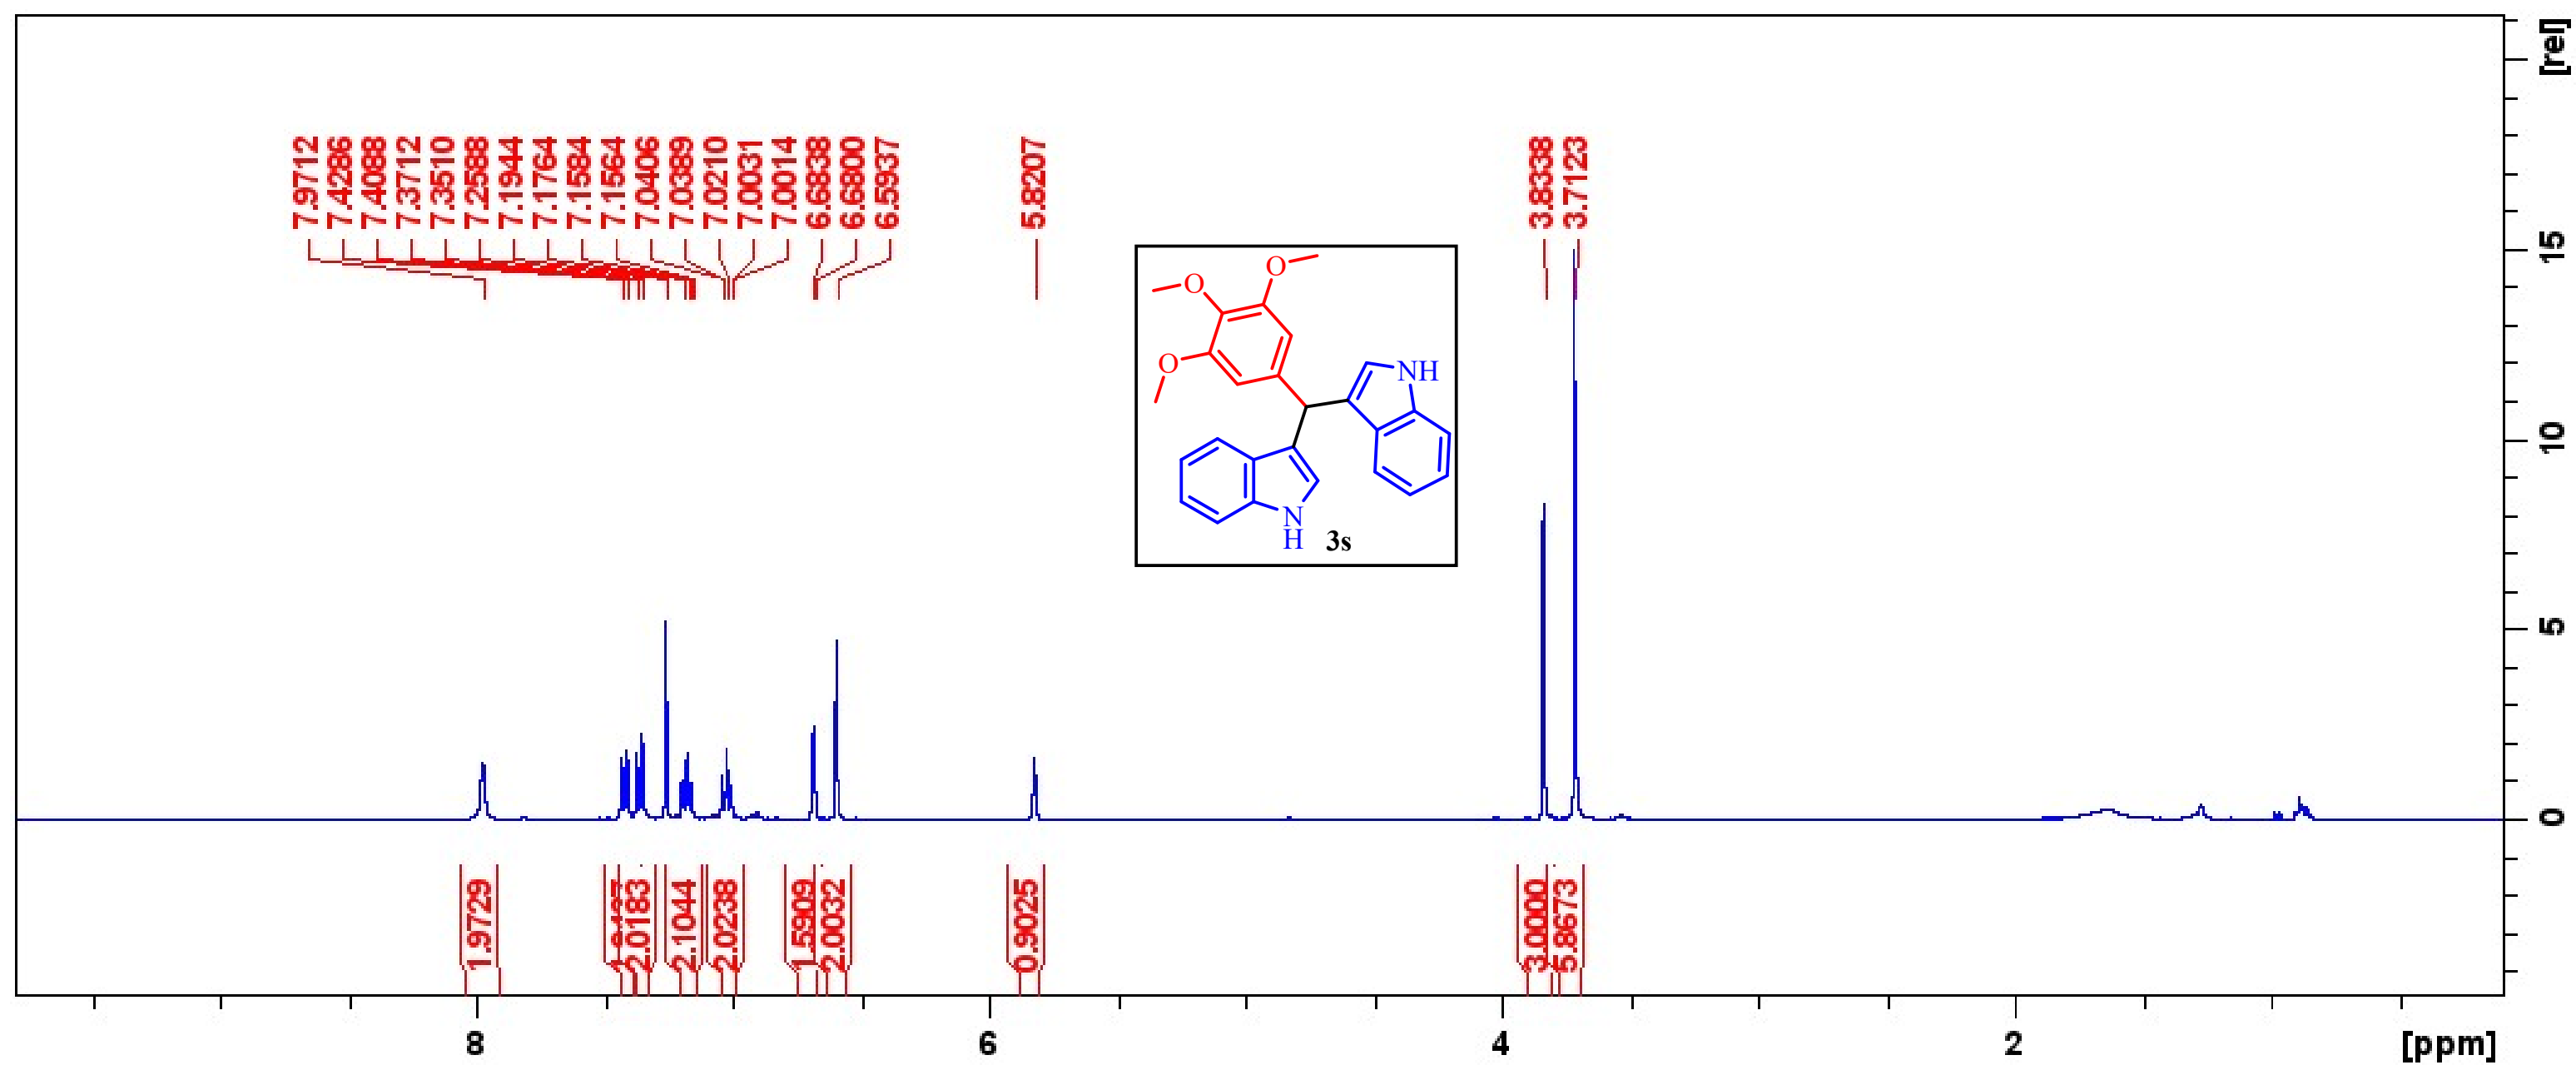

Figure 52.  $^1\text{H}$  NMR spectrum of compound 3s

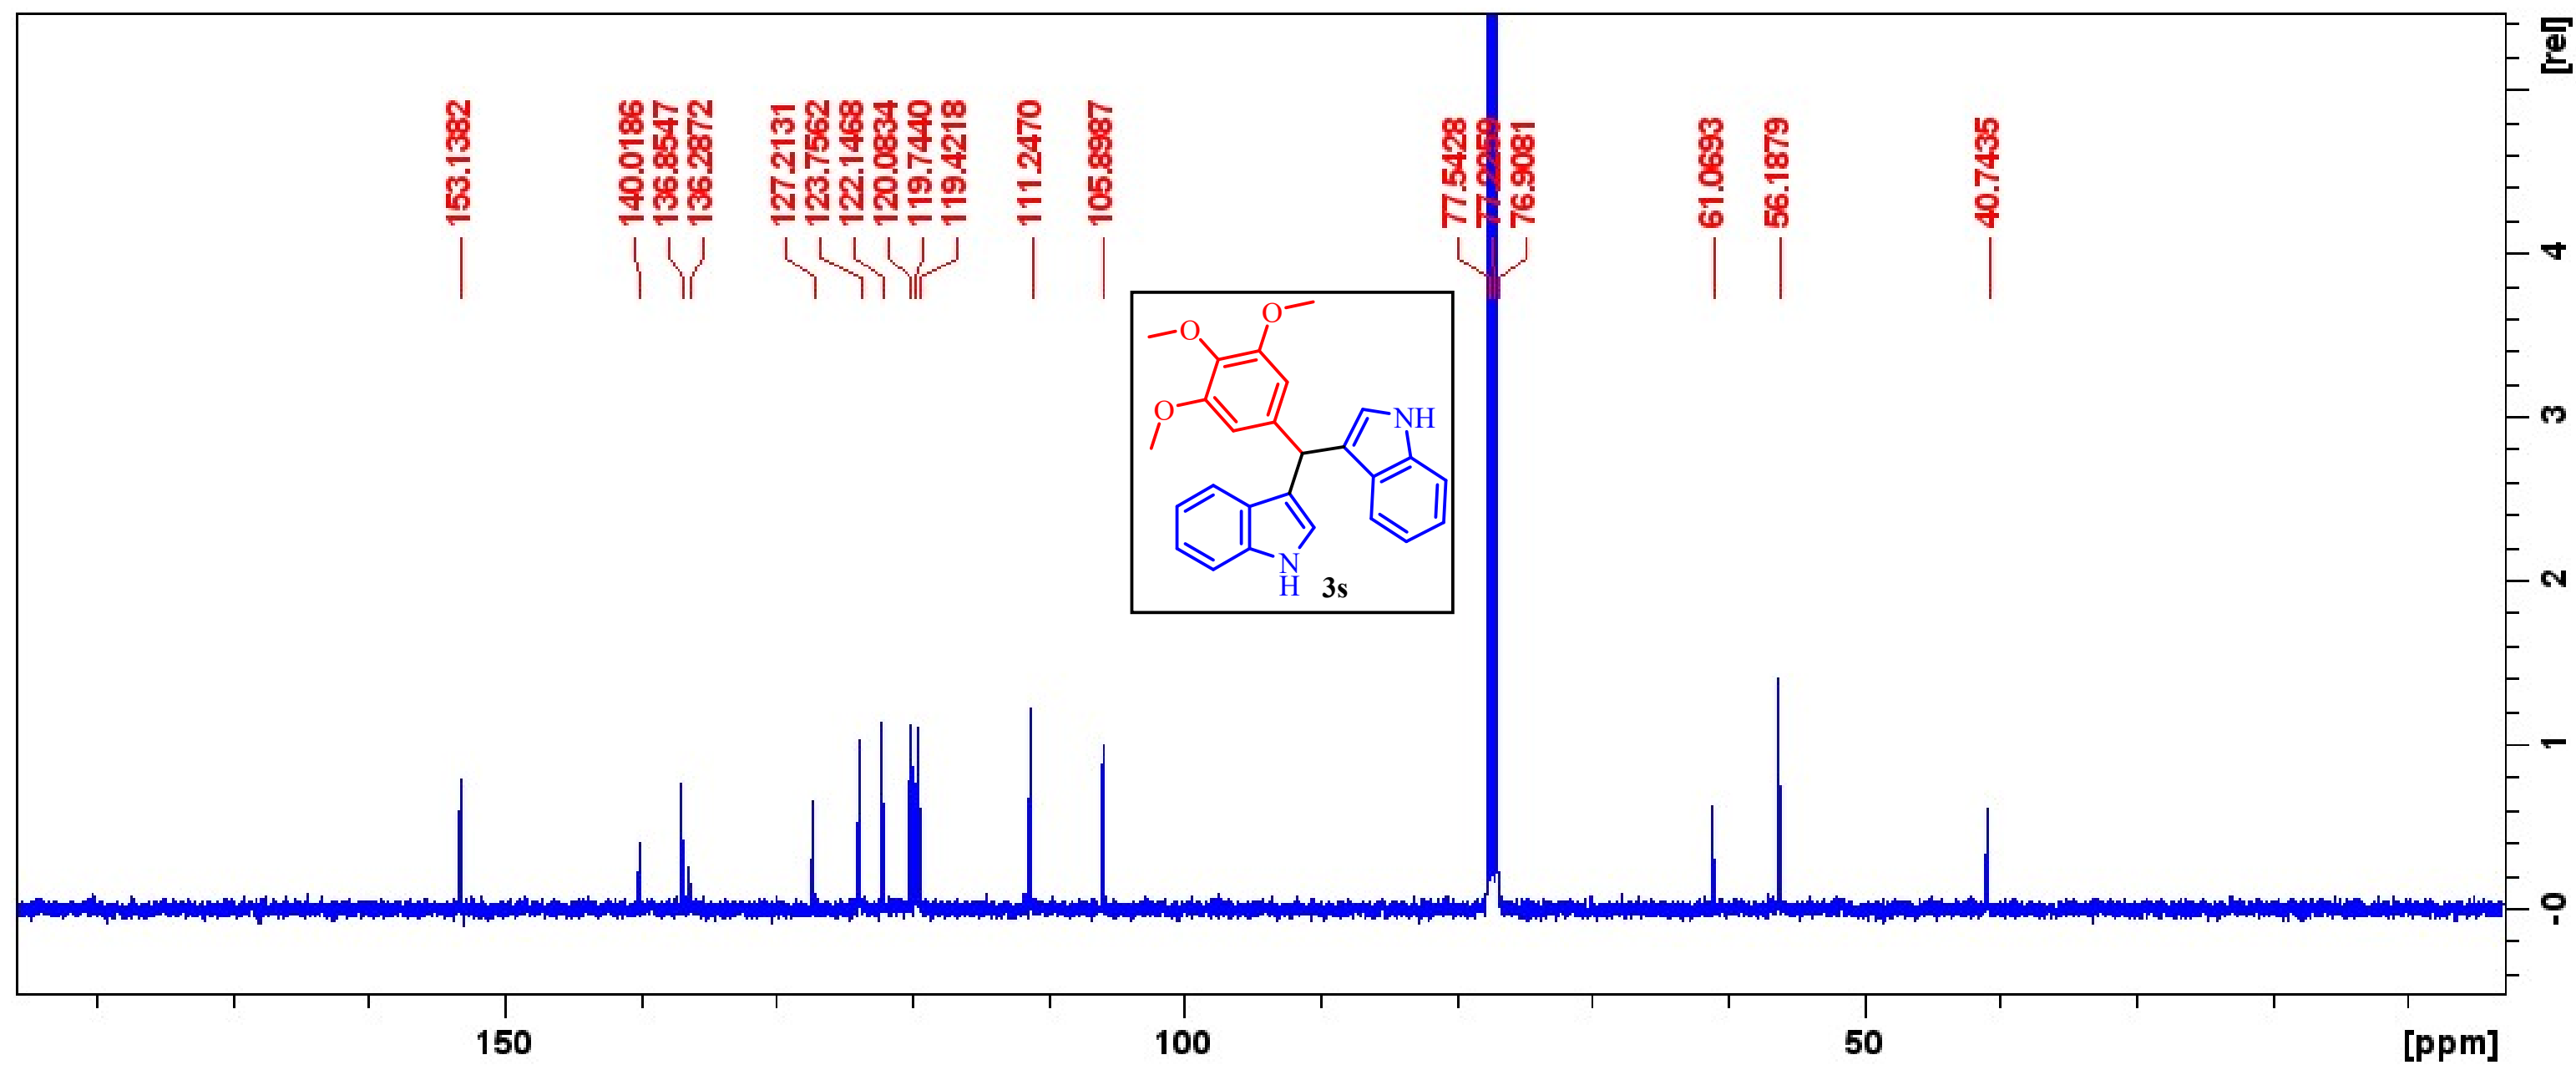

Figure 53.  $^{13}\text{C}$  NMR spectrum of compound 3s



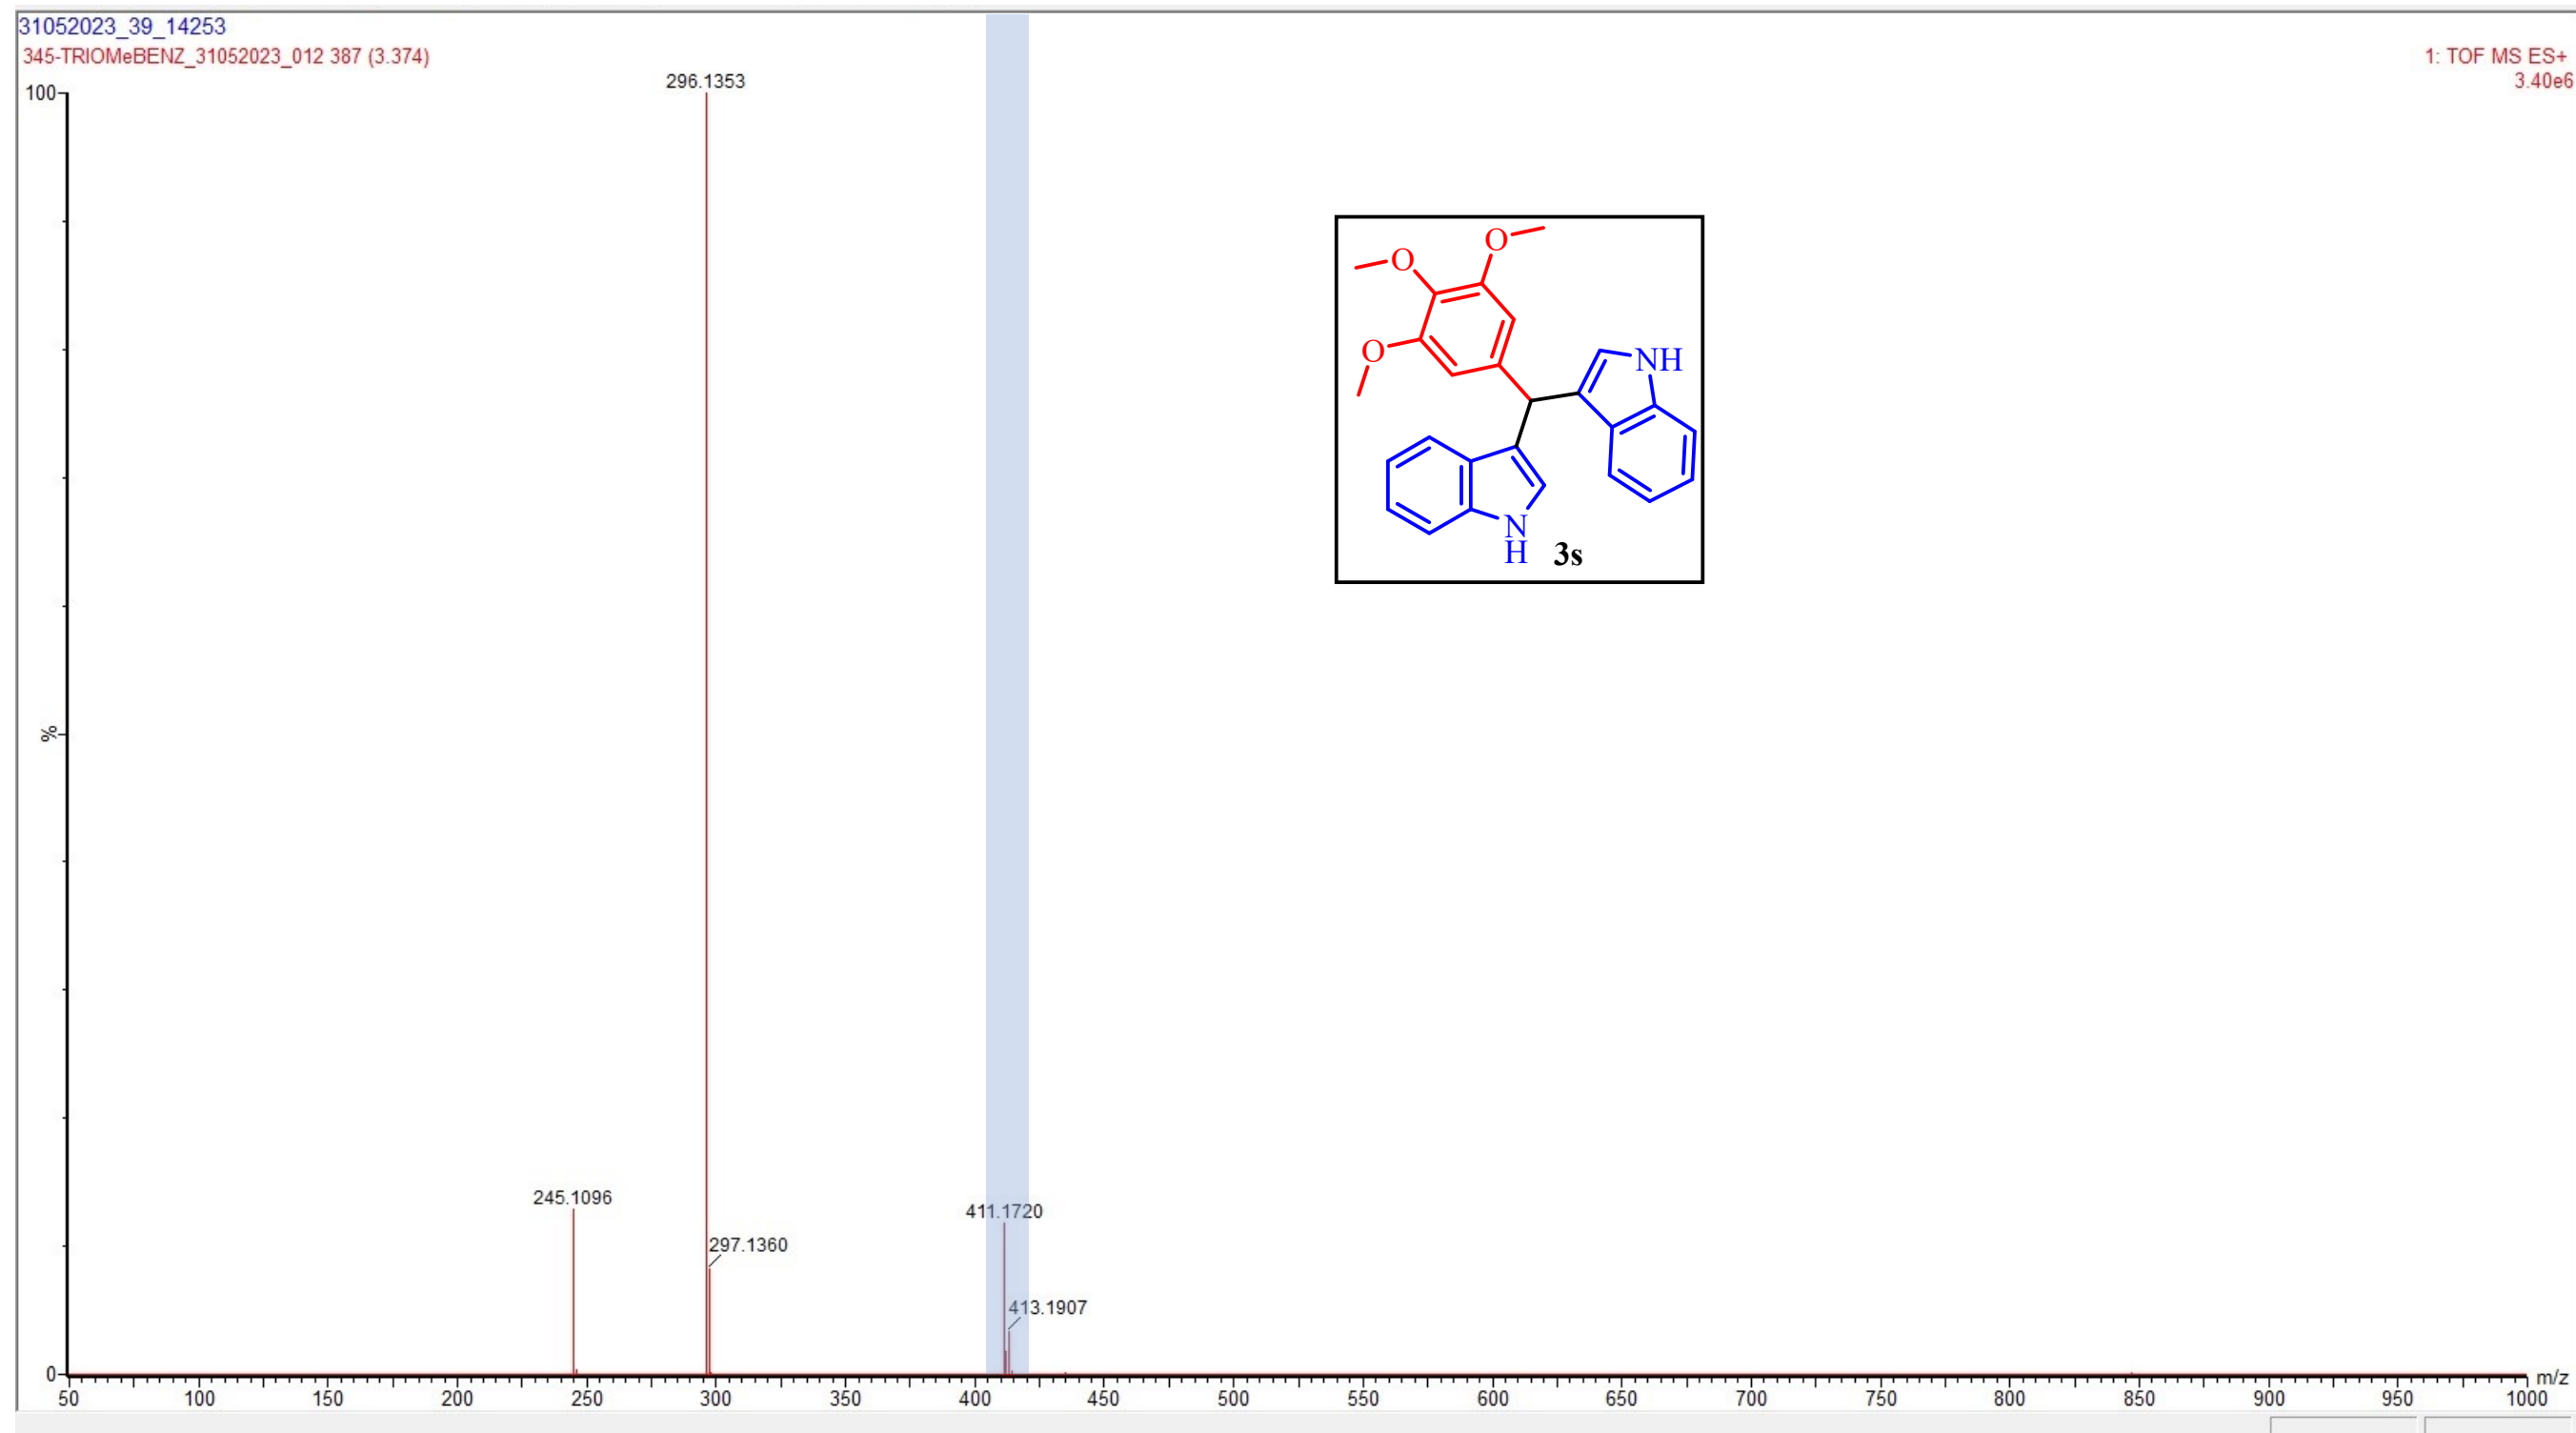

Figure 54. HRMS spectrum of compound **3s**

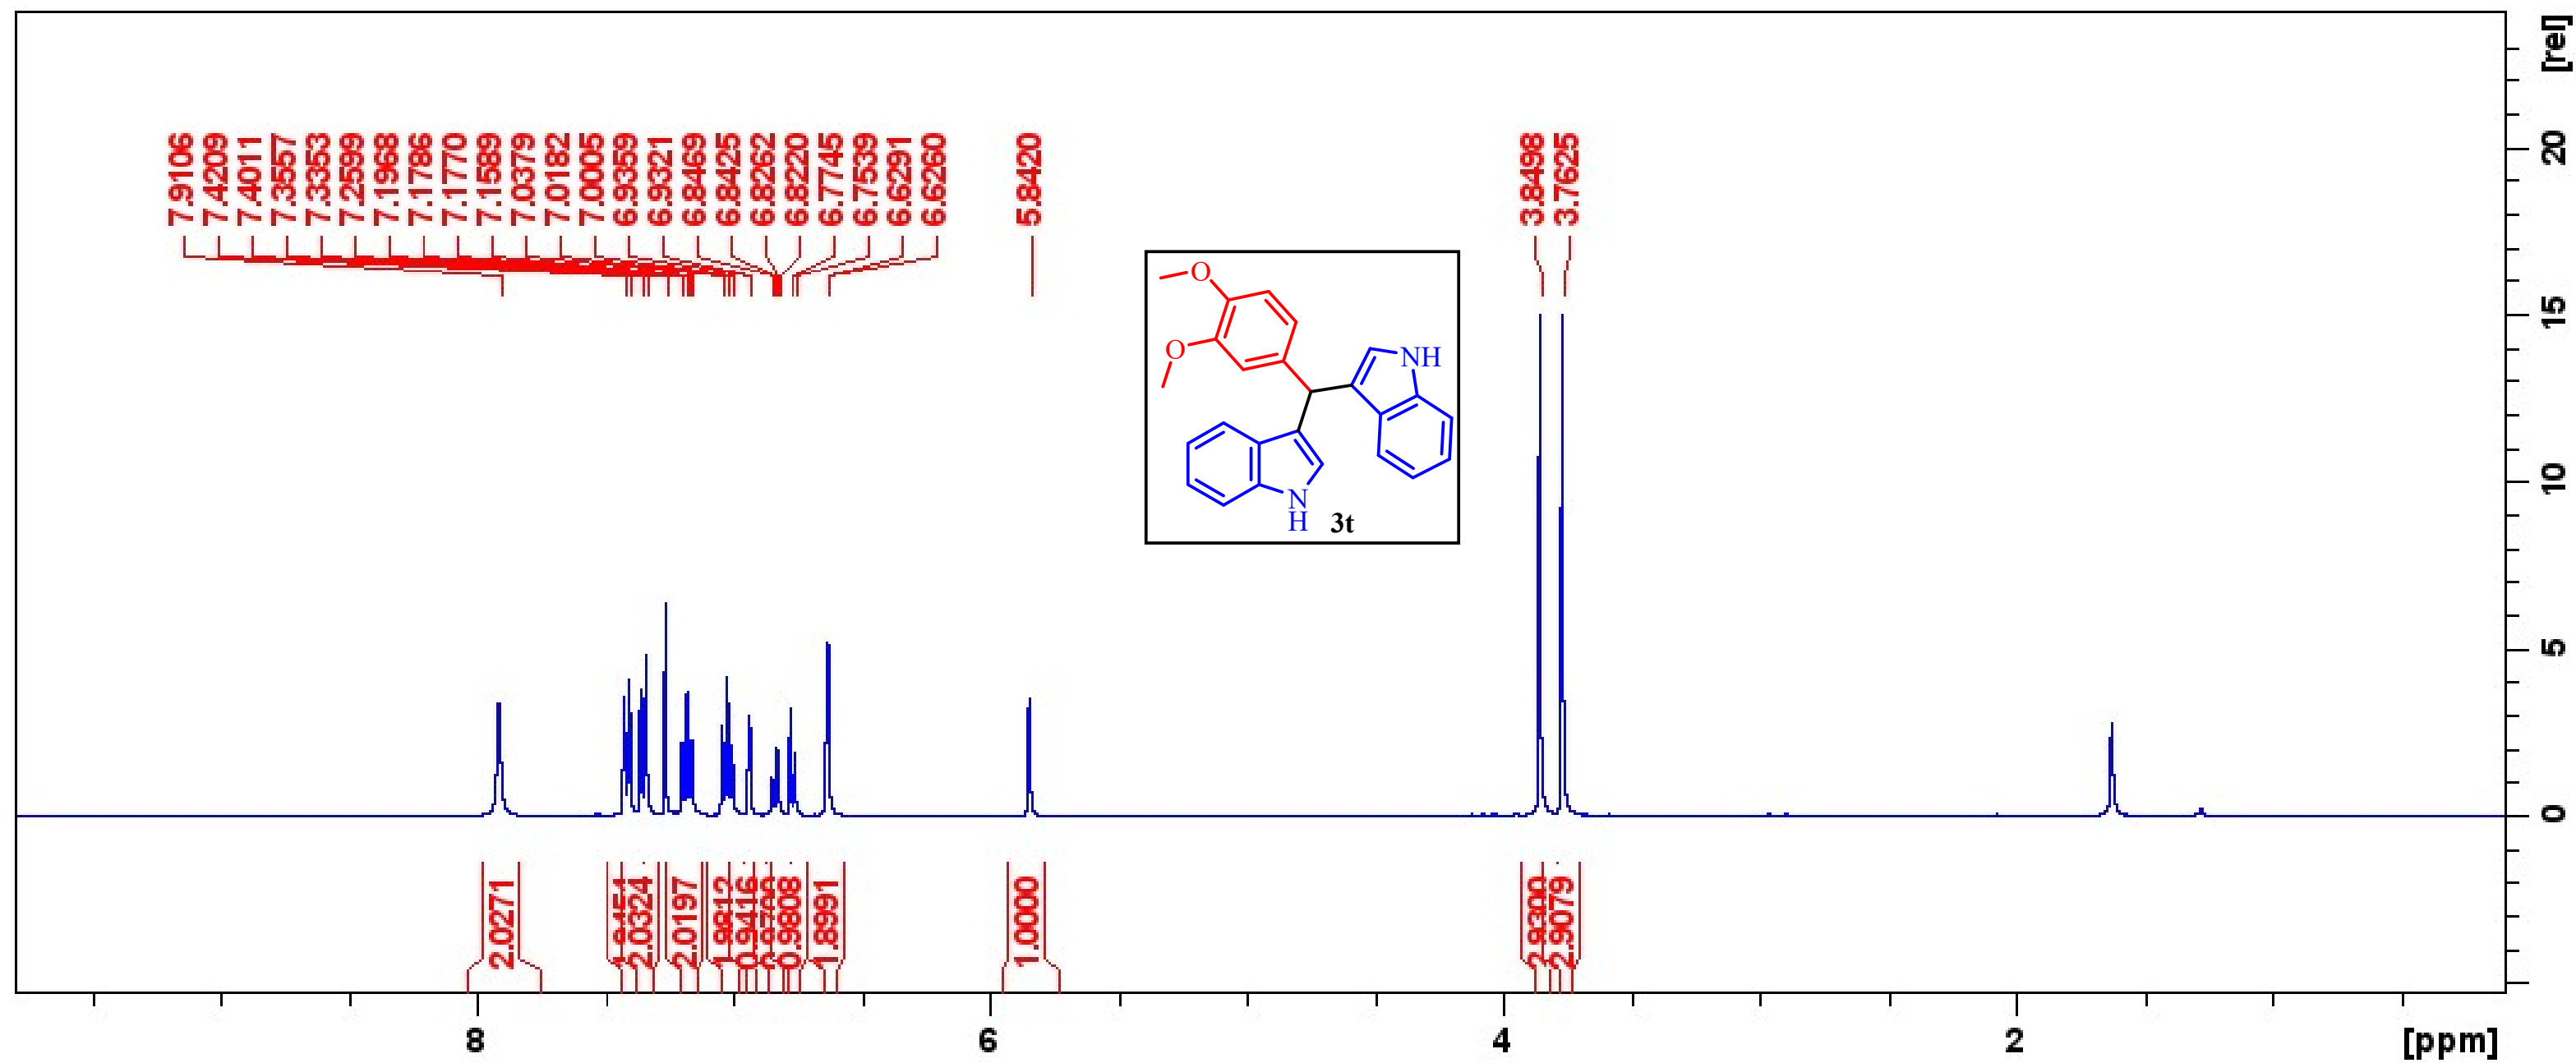

Figure 55.  $^1\text{H}$  NMR spectrum of compound **3t**

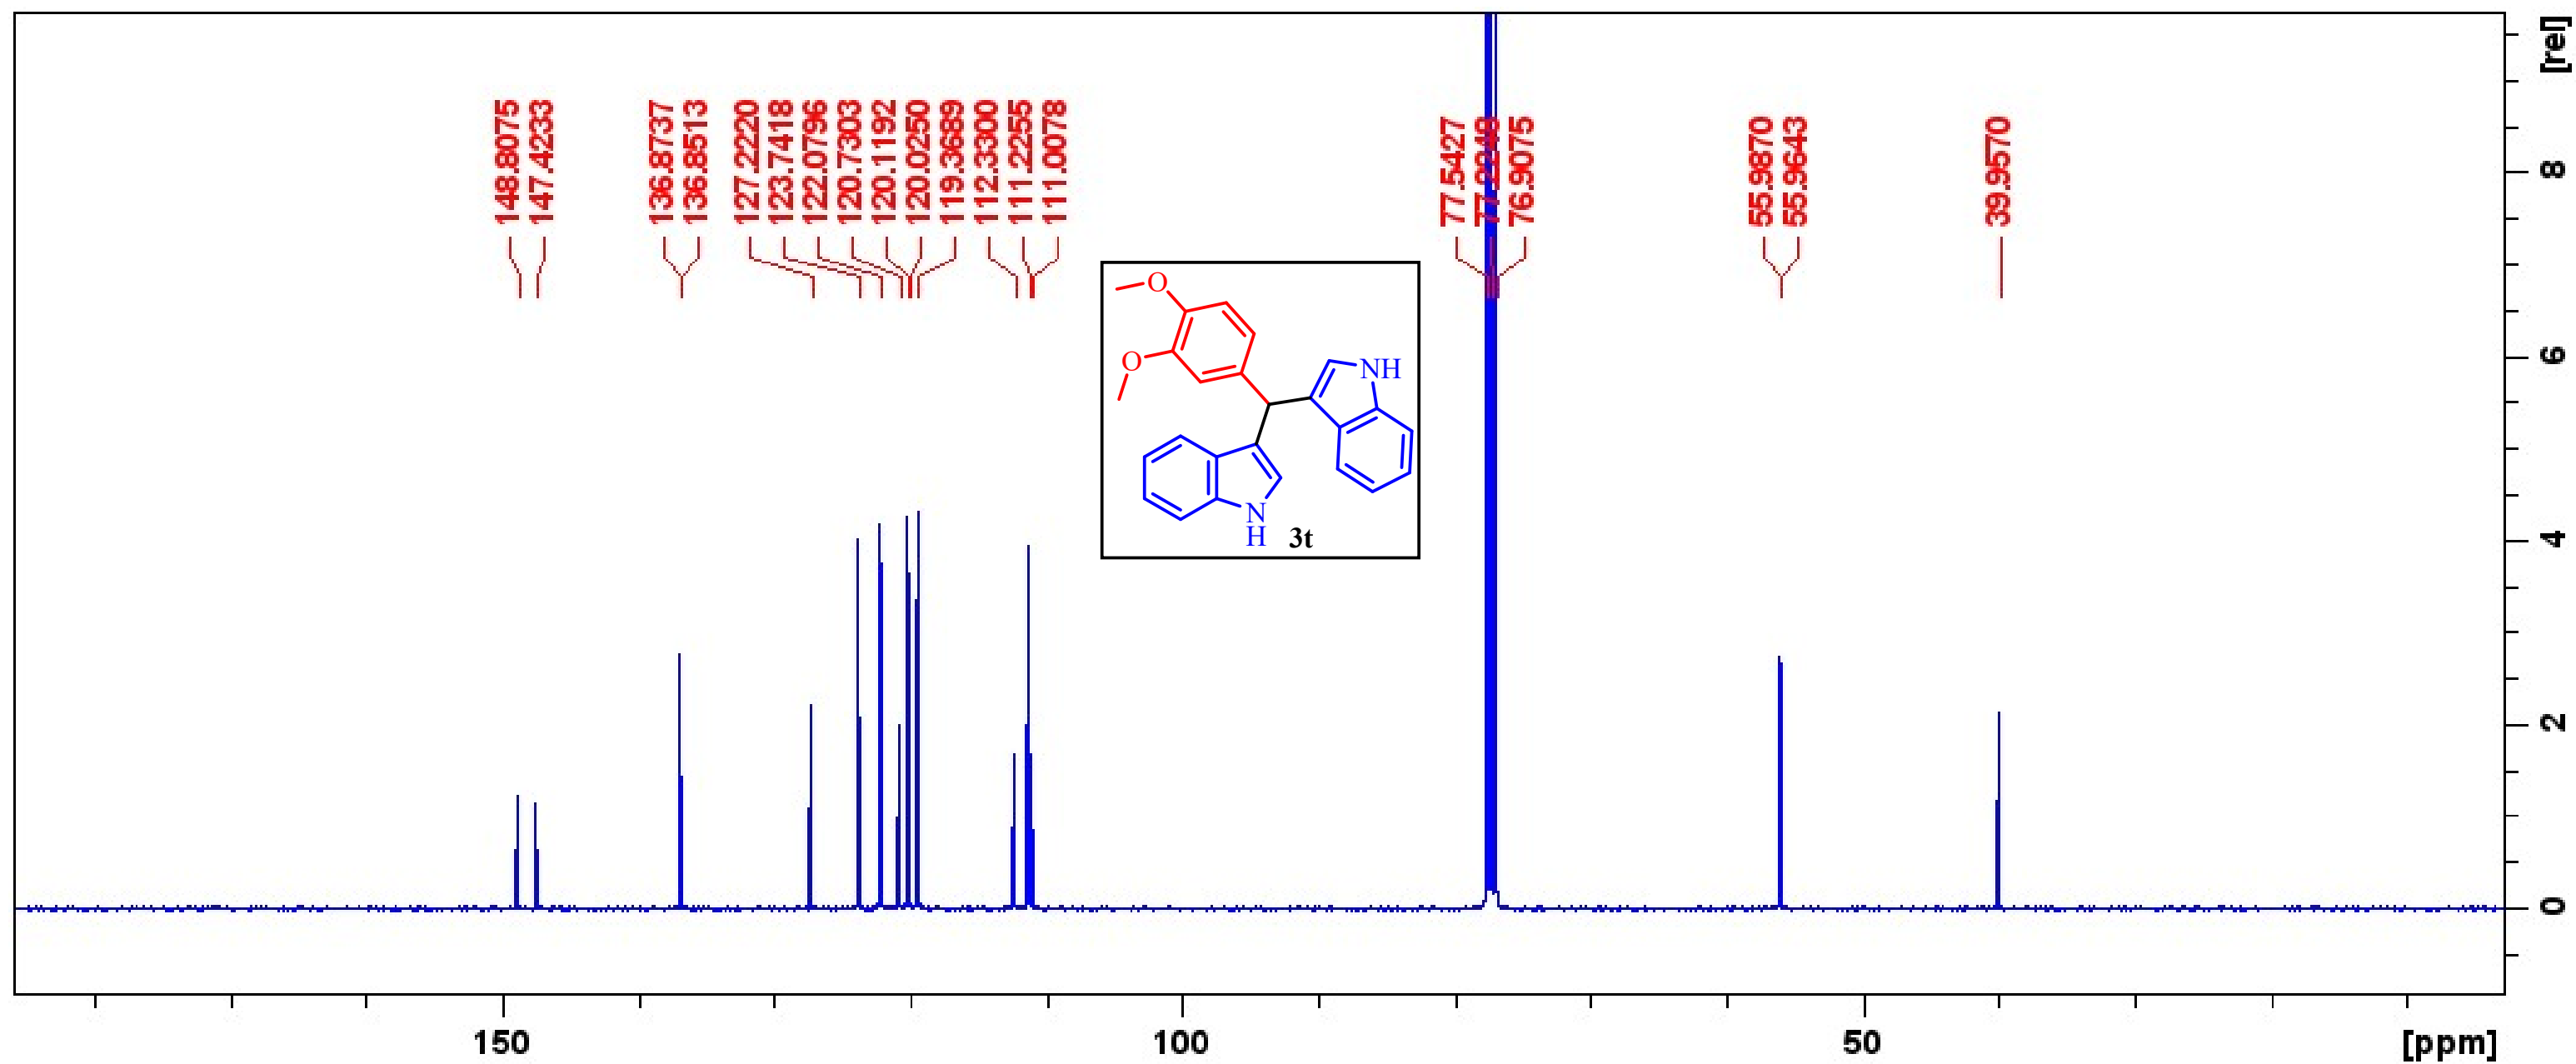

Figure 56.  $^{13}\text{C}$  NMR spectrum of compound **3t**

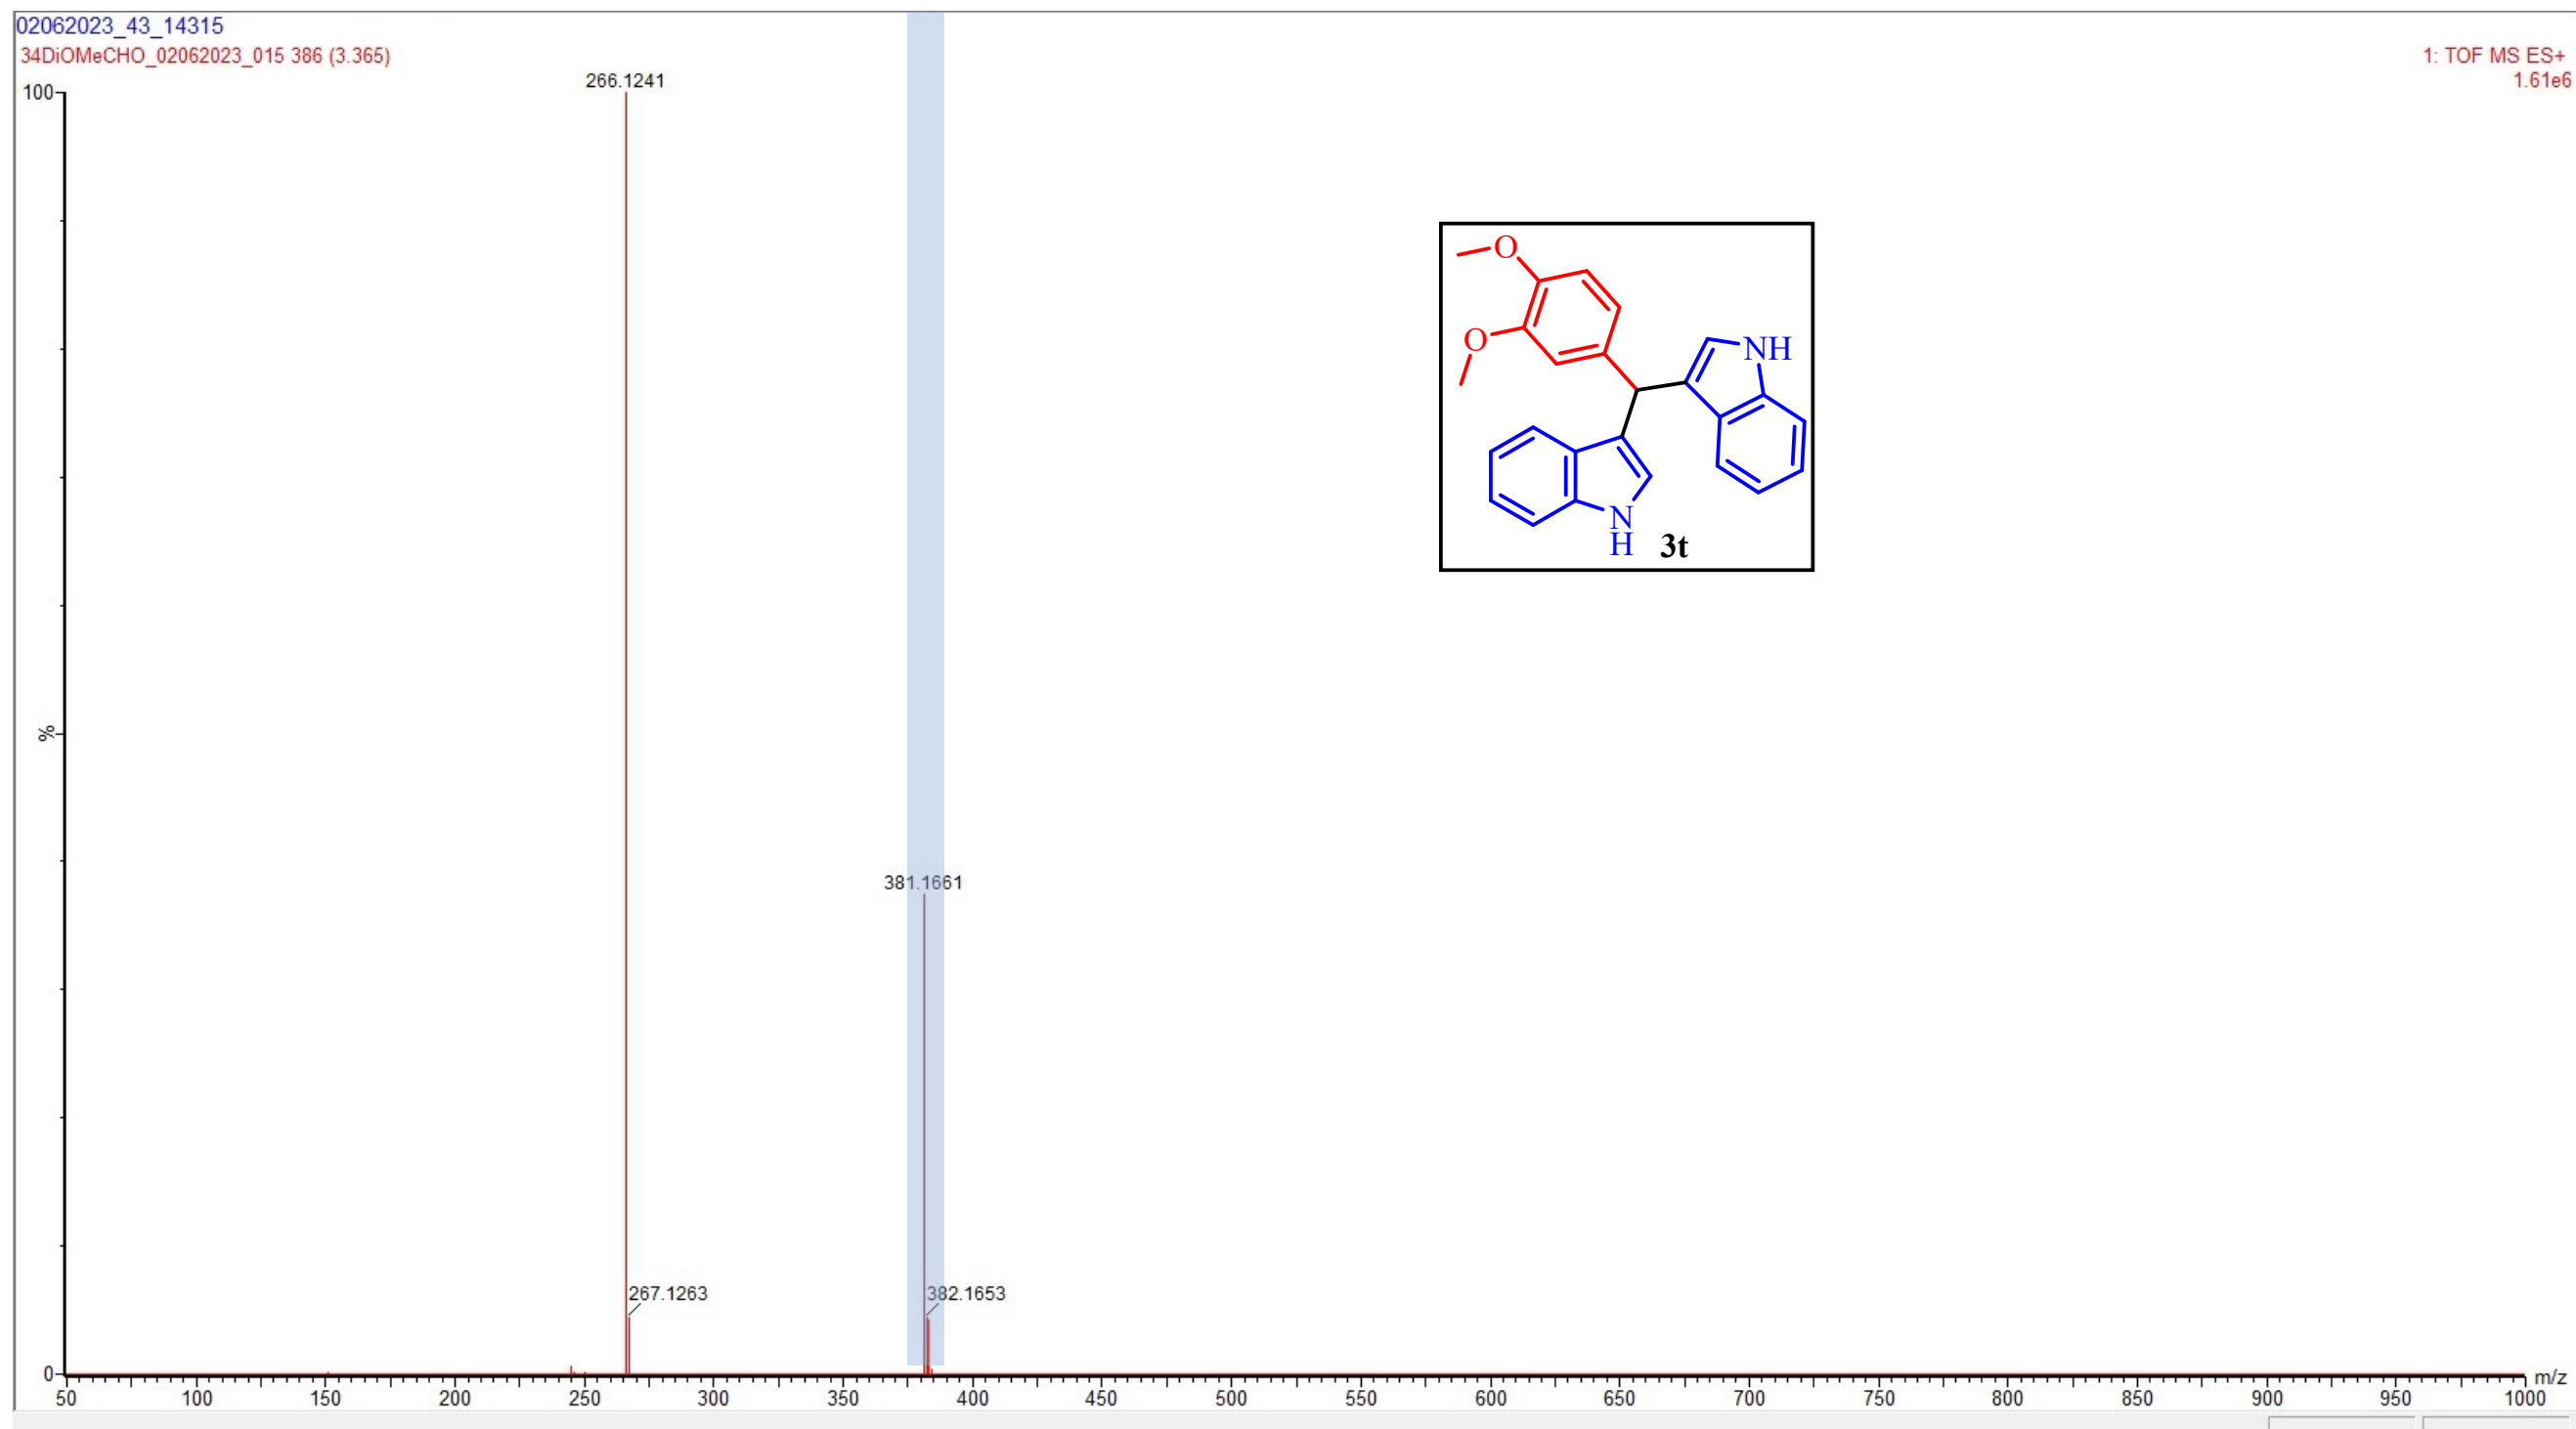

Figure 57. HRMS spectrum of compound **3t**

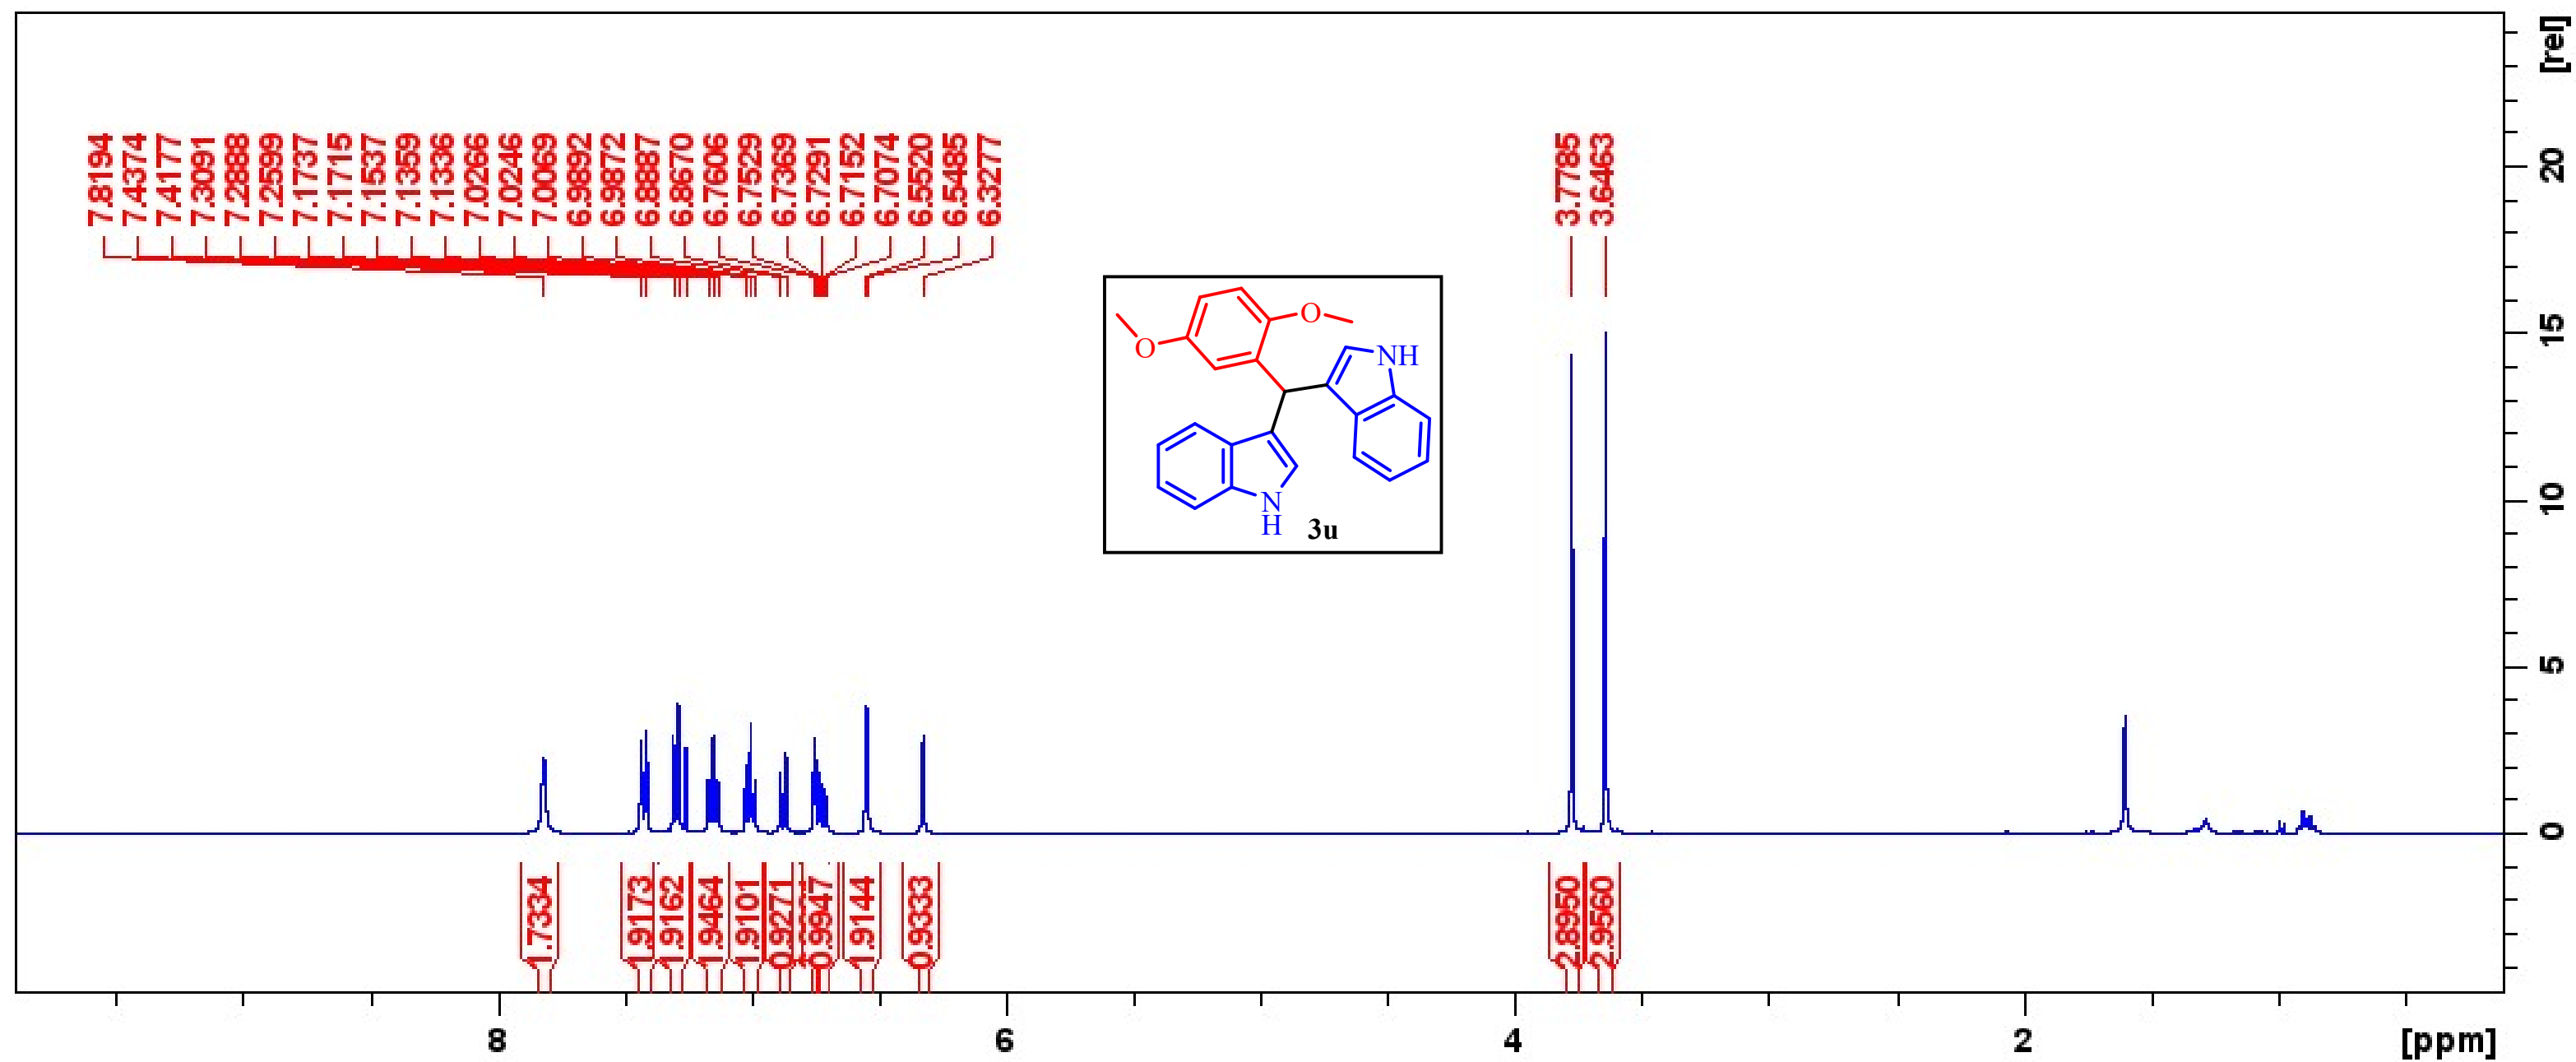

Figure 58.  $^1\text{H}$  NMR spectrum of compound **3u**

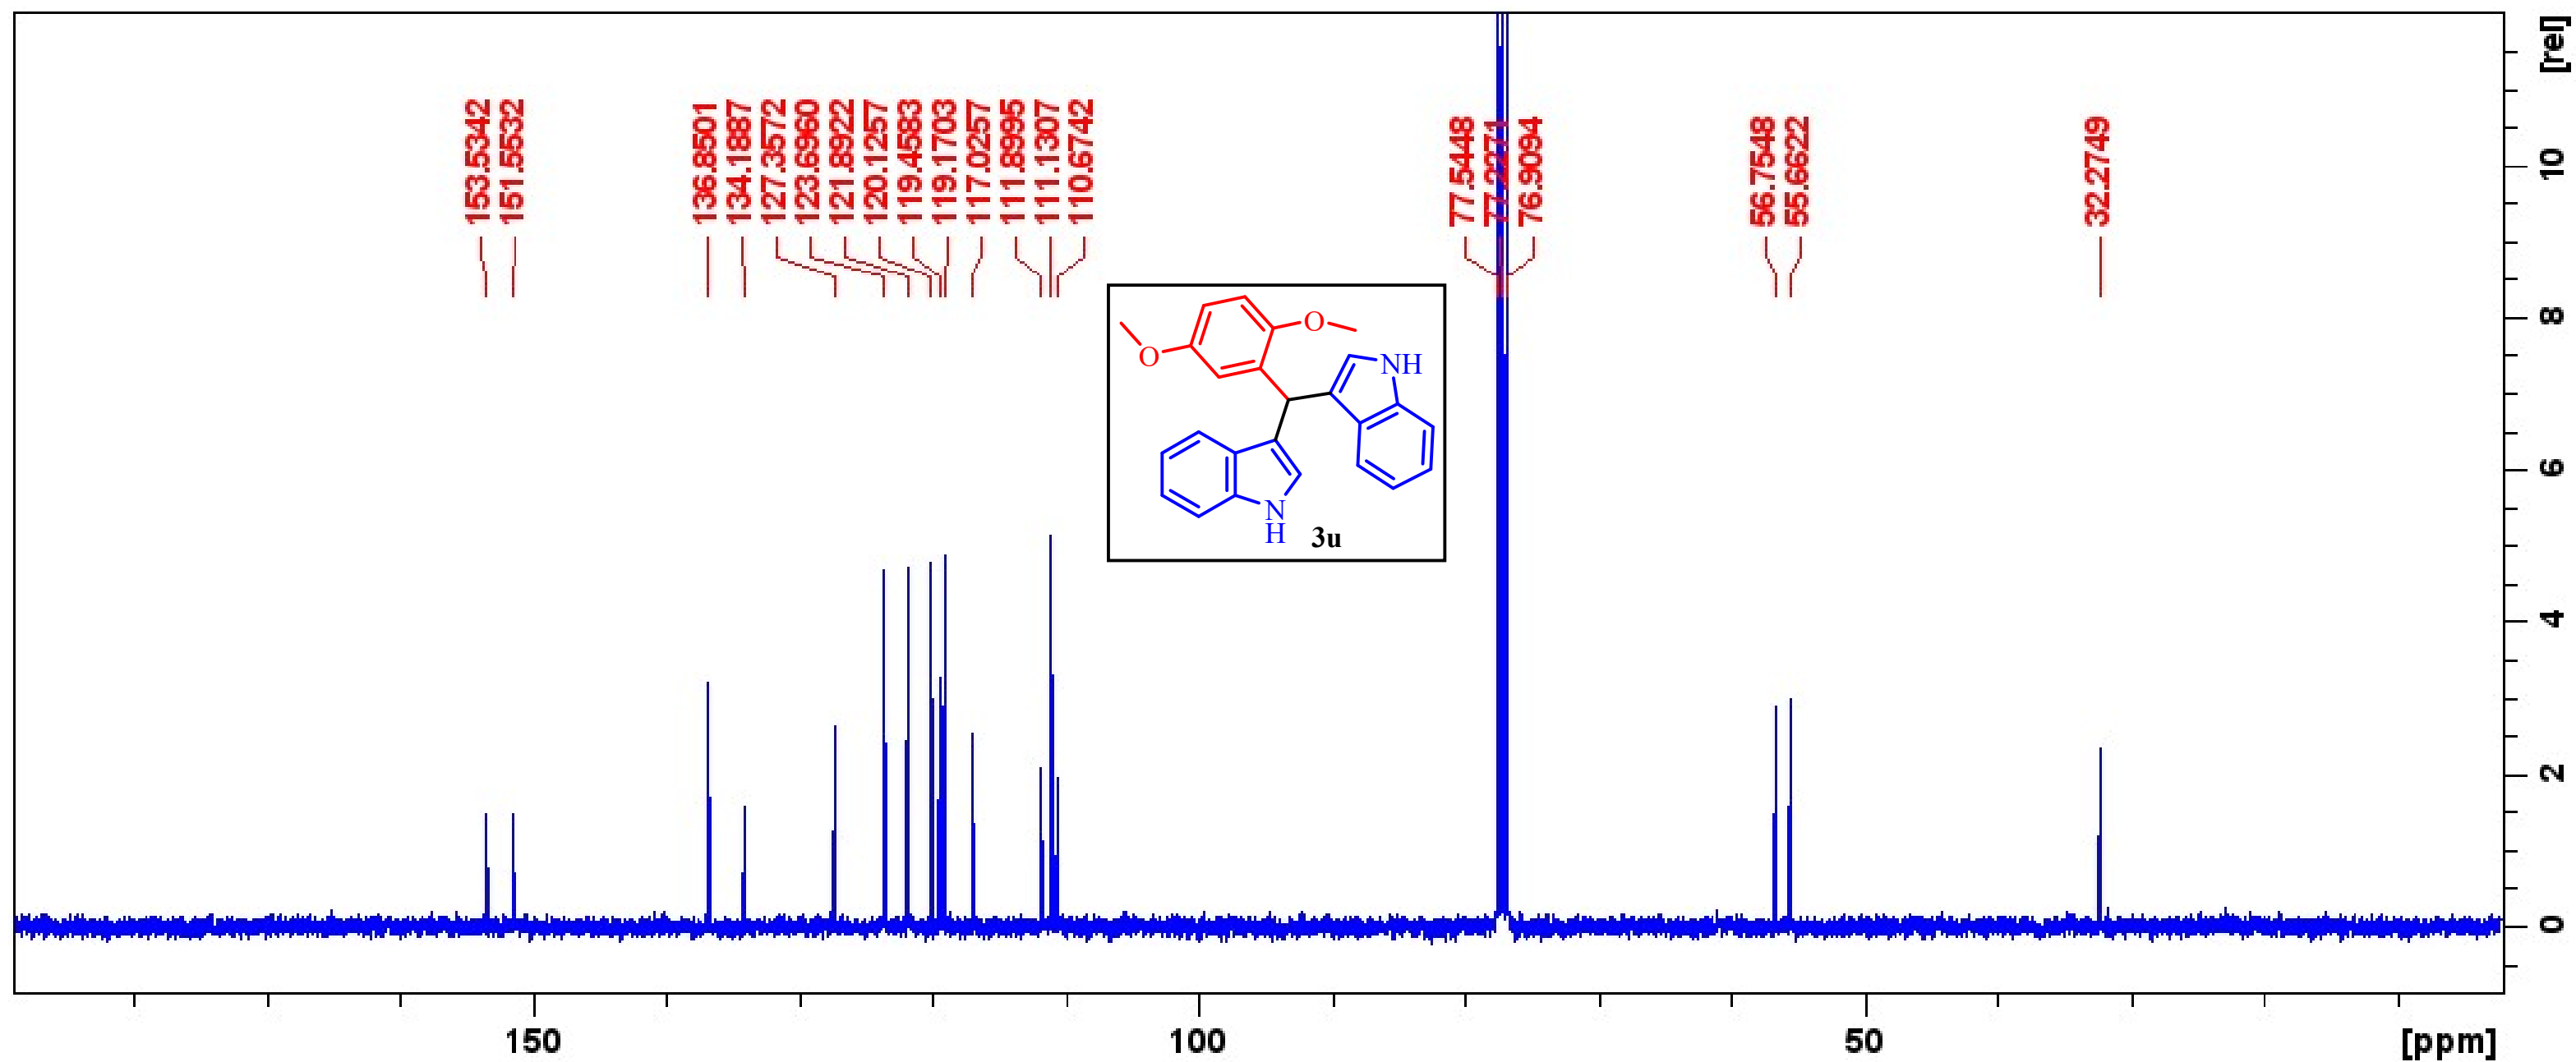

Figure 59.  $^{13}\text{C}$  NMR spectrum of compound **3u**

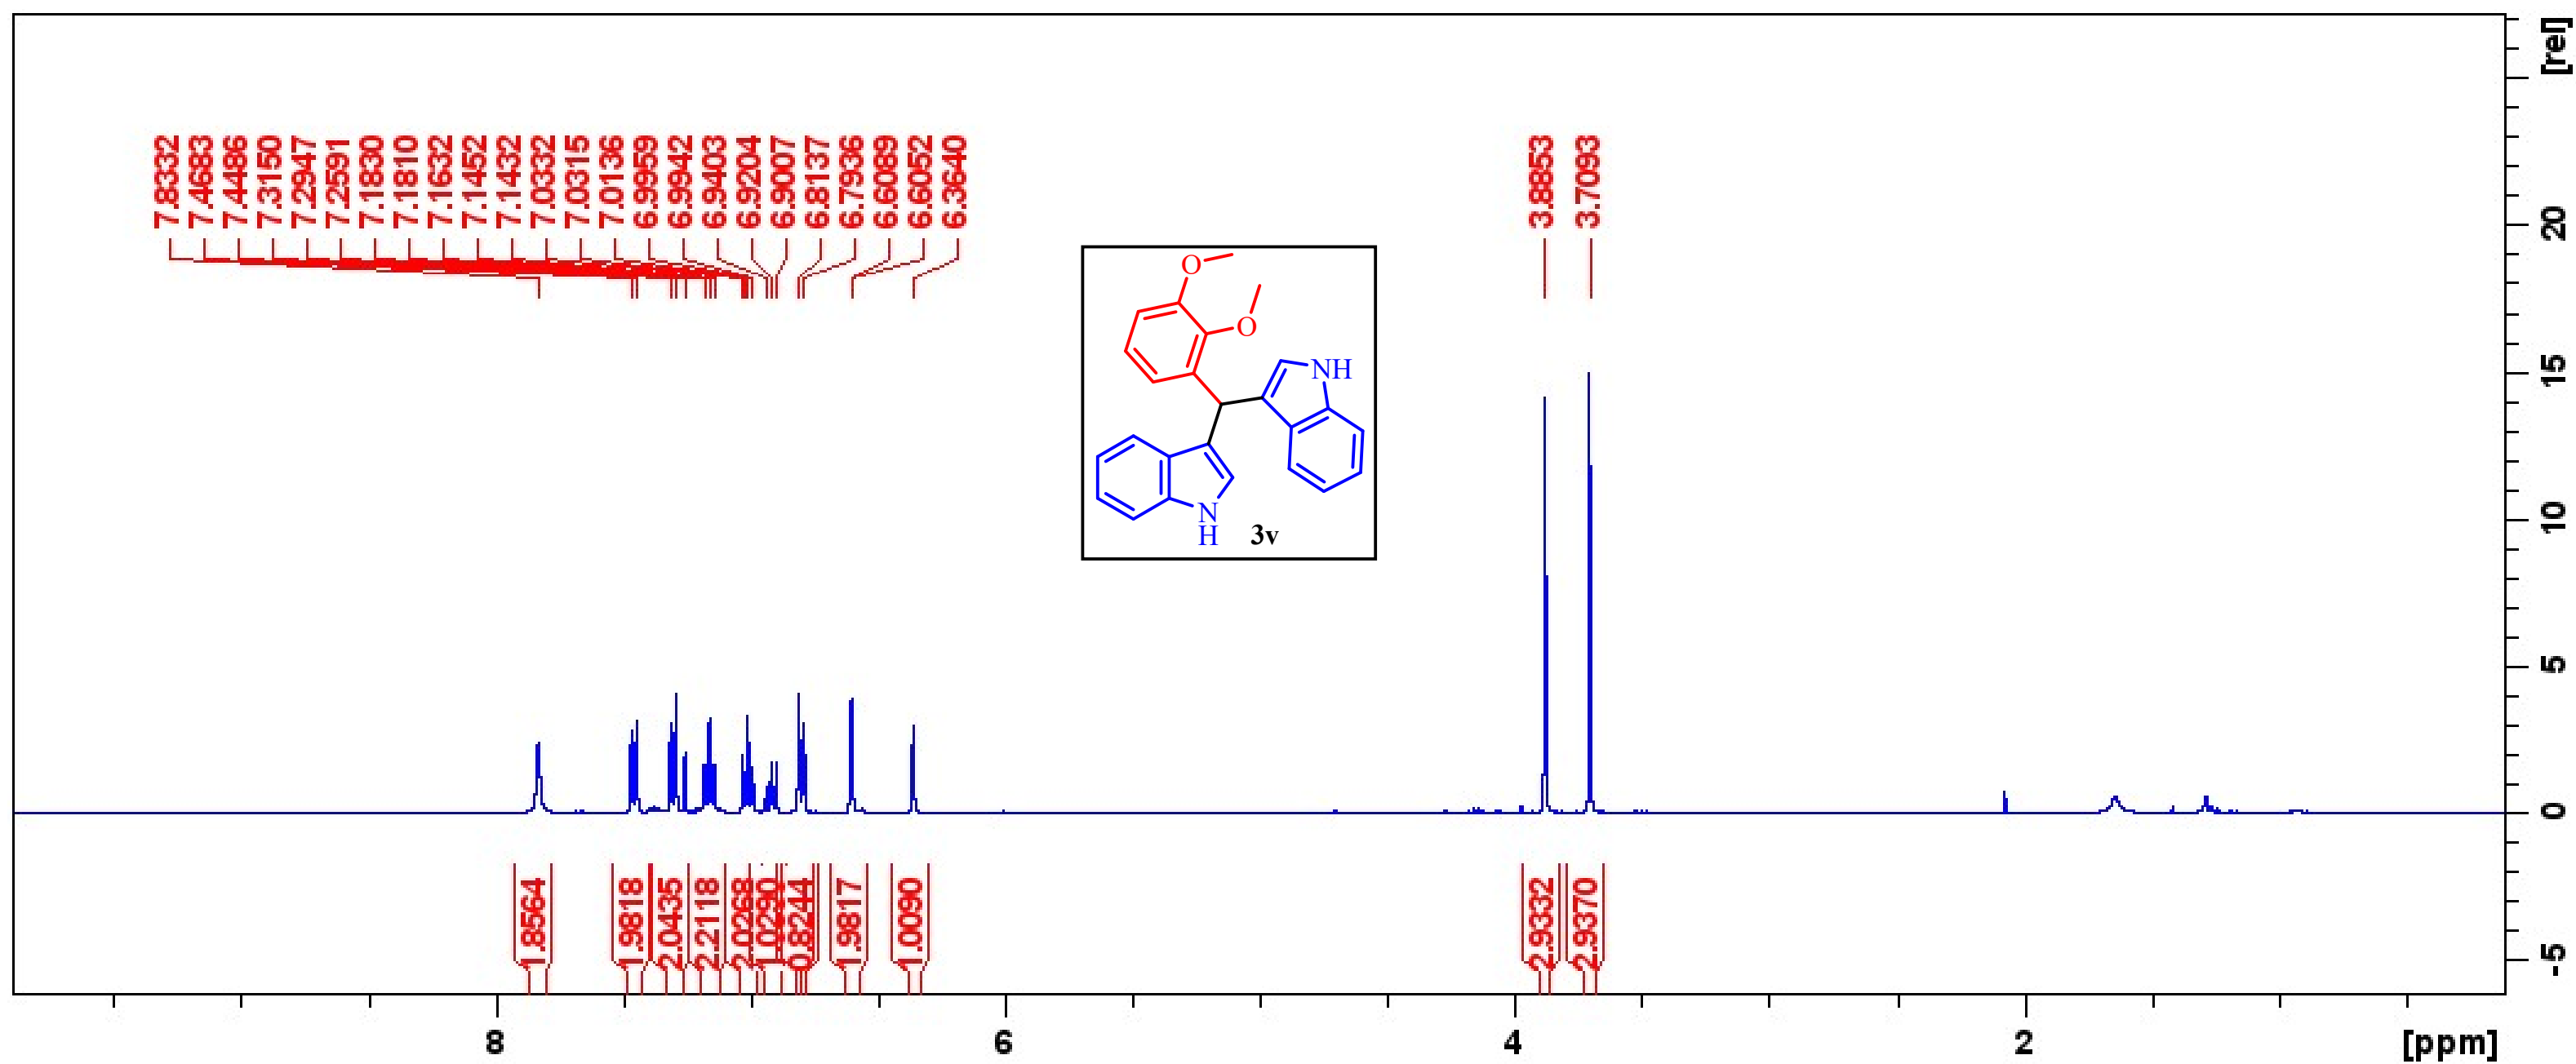

Figure 60. <sup>1</sup>H NMR spectrum of compound 3v

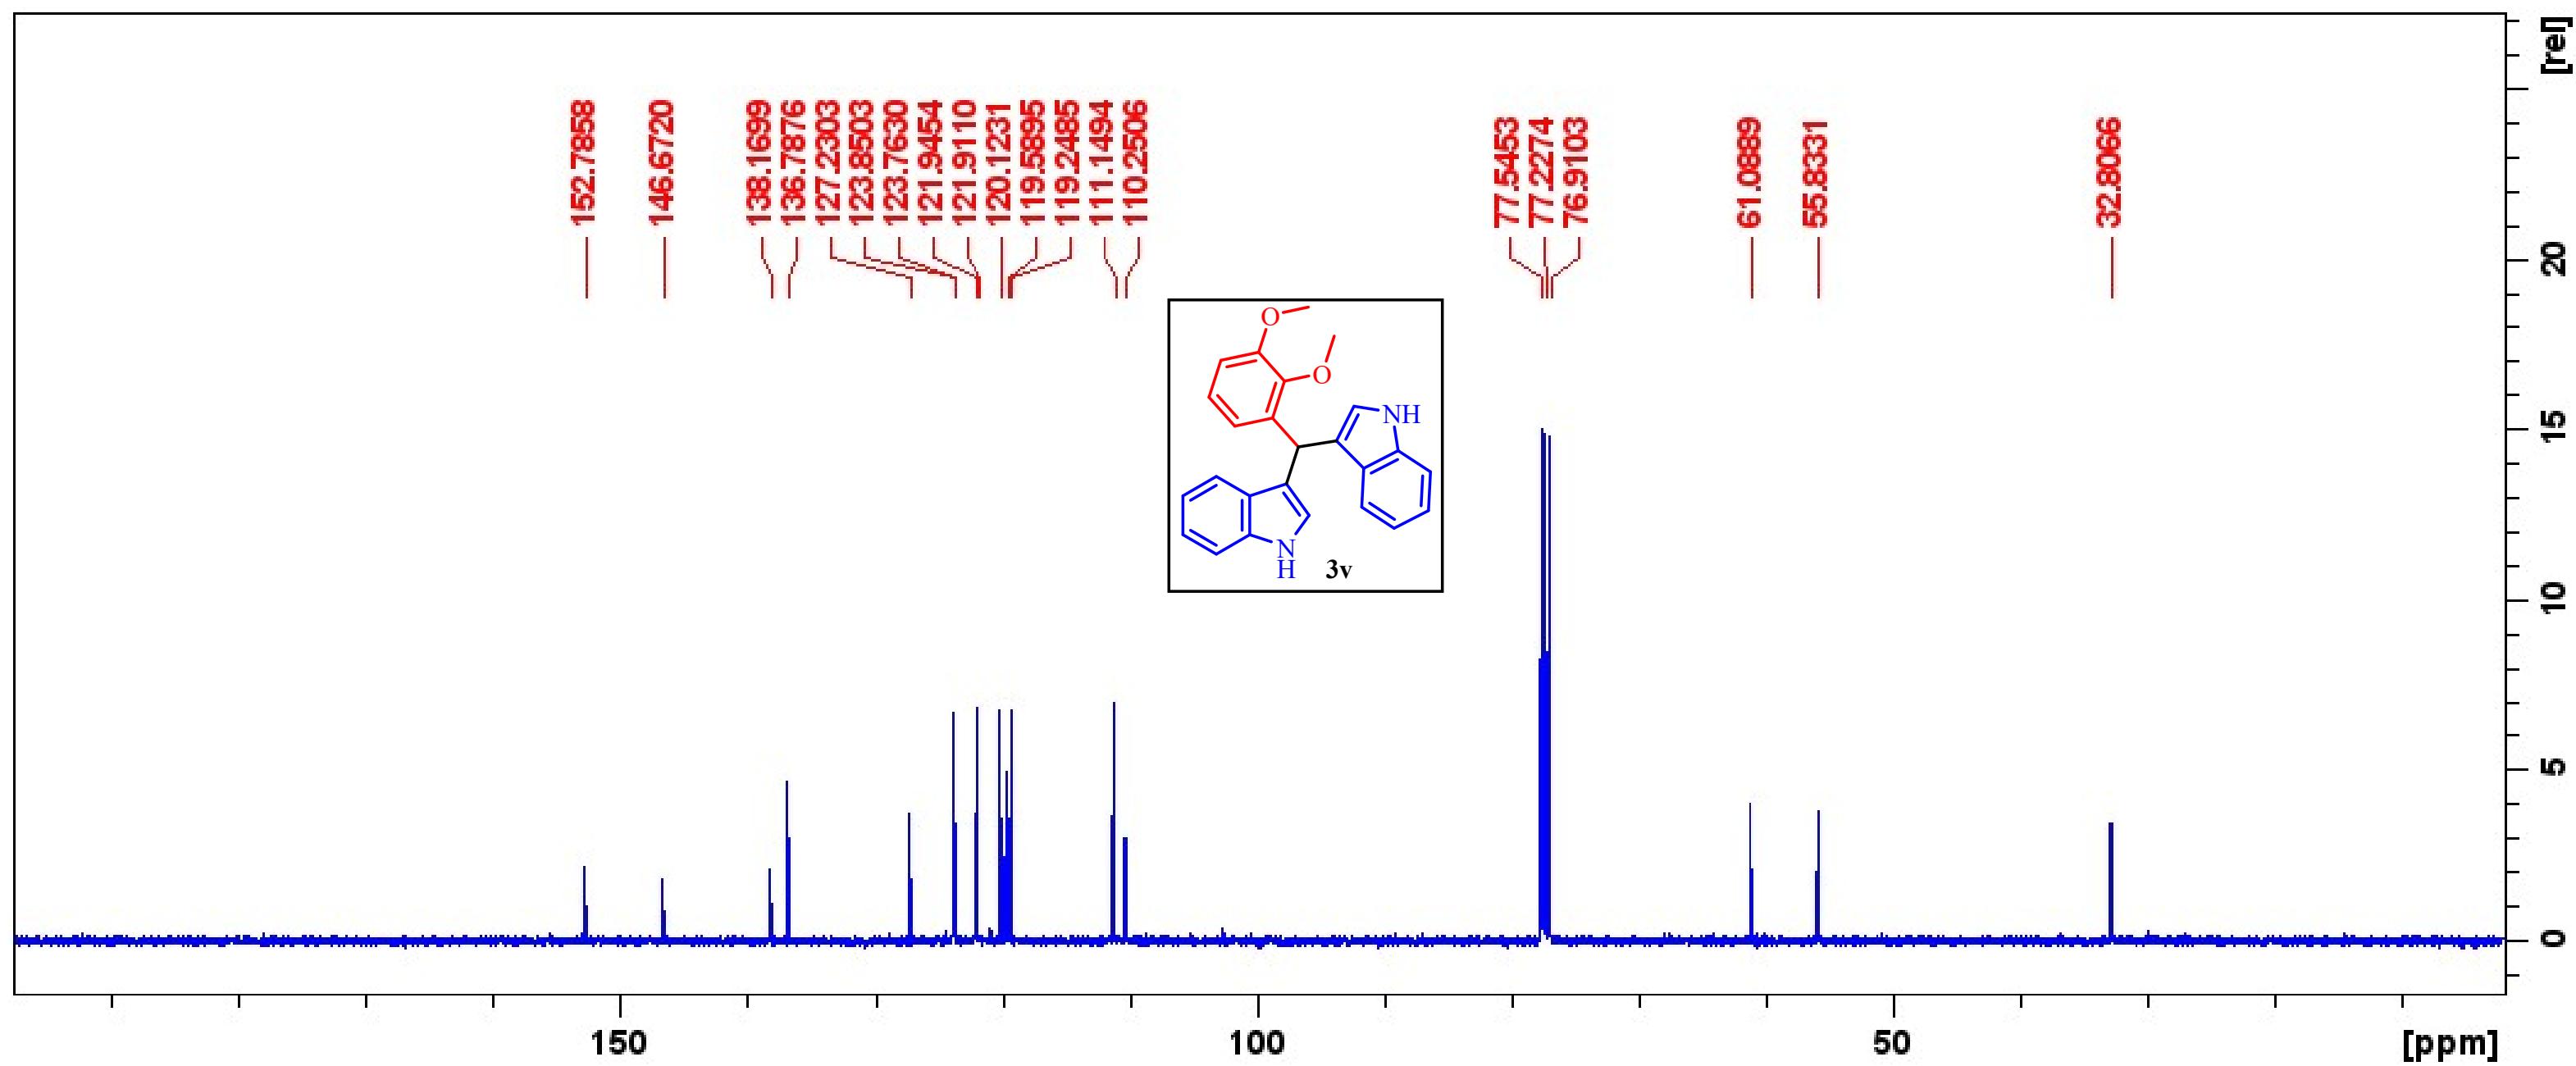

Figure 61. <sup>13</sup>C NMR spectrum of compound **3v**



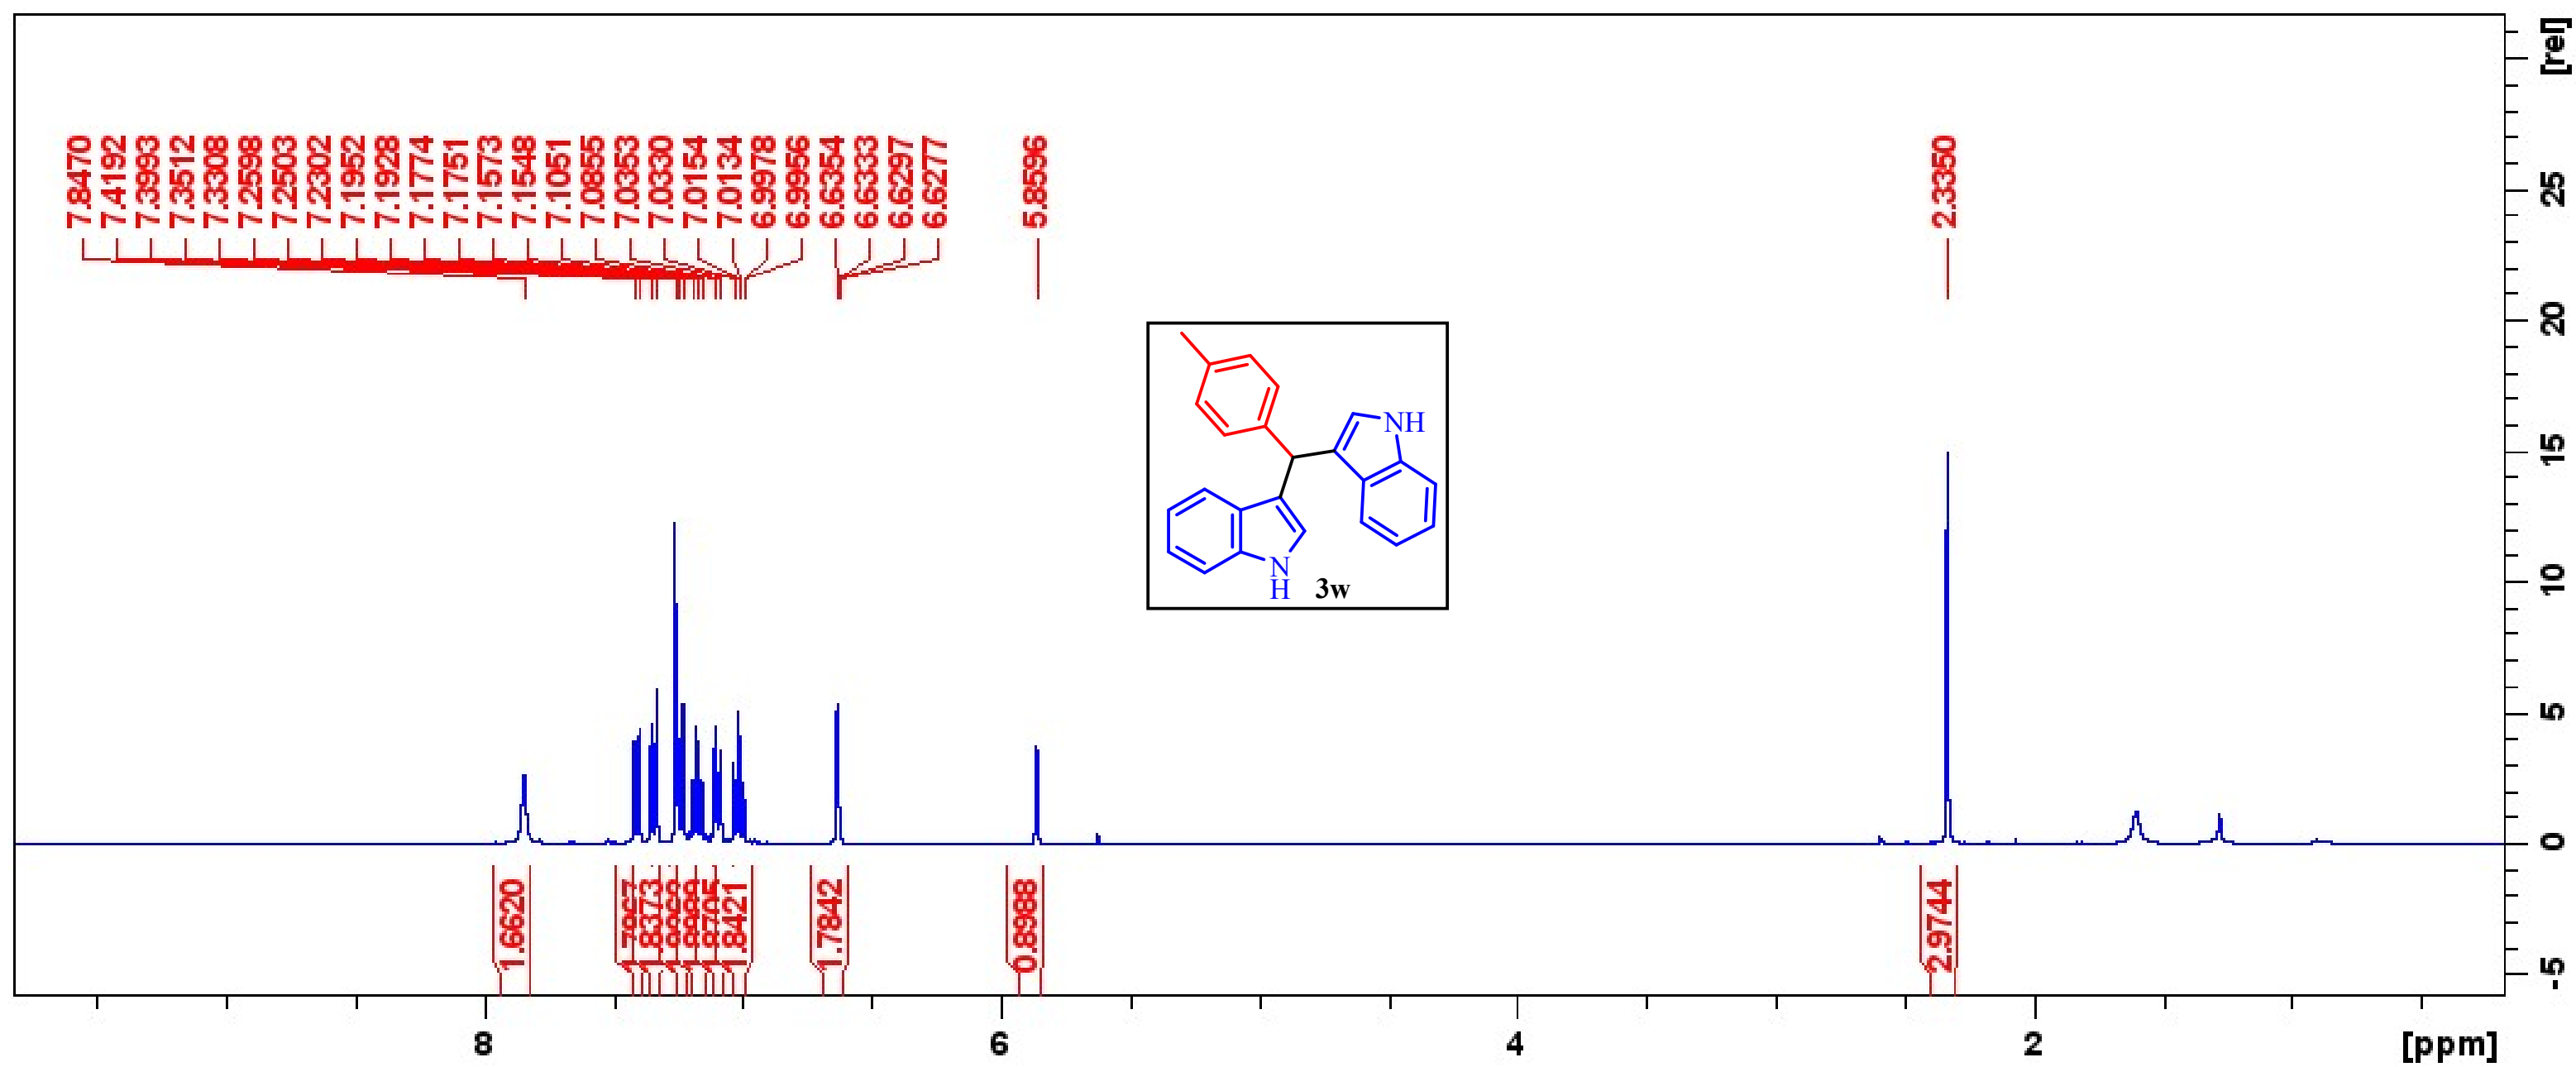

Figure 62. <sup>1</sup>H NMR spectrum of compound **3w**

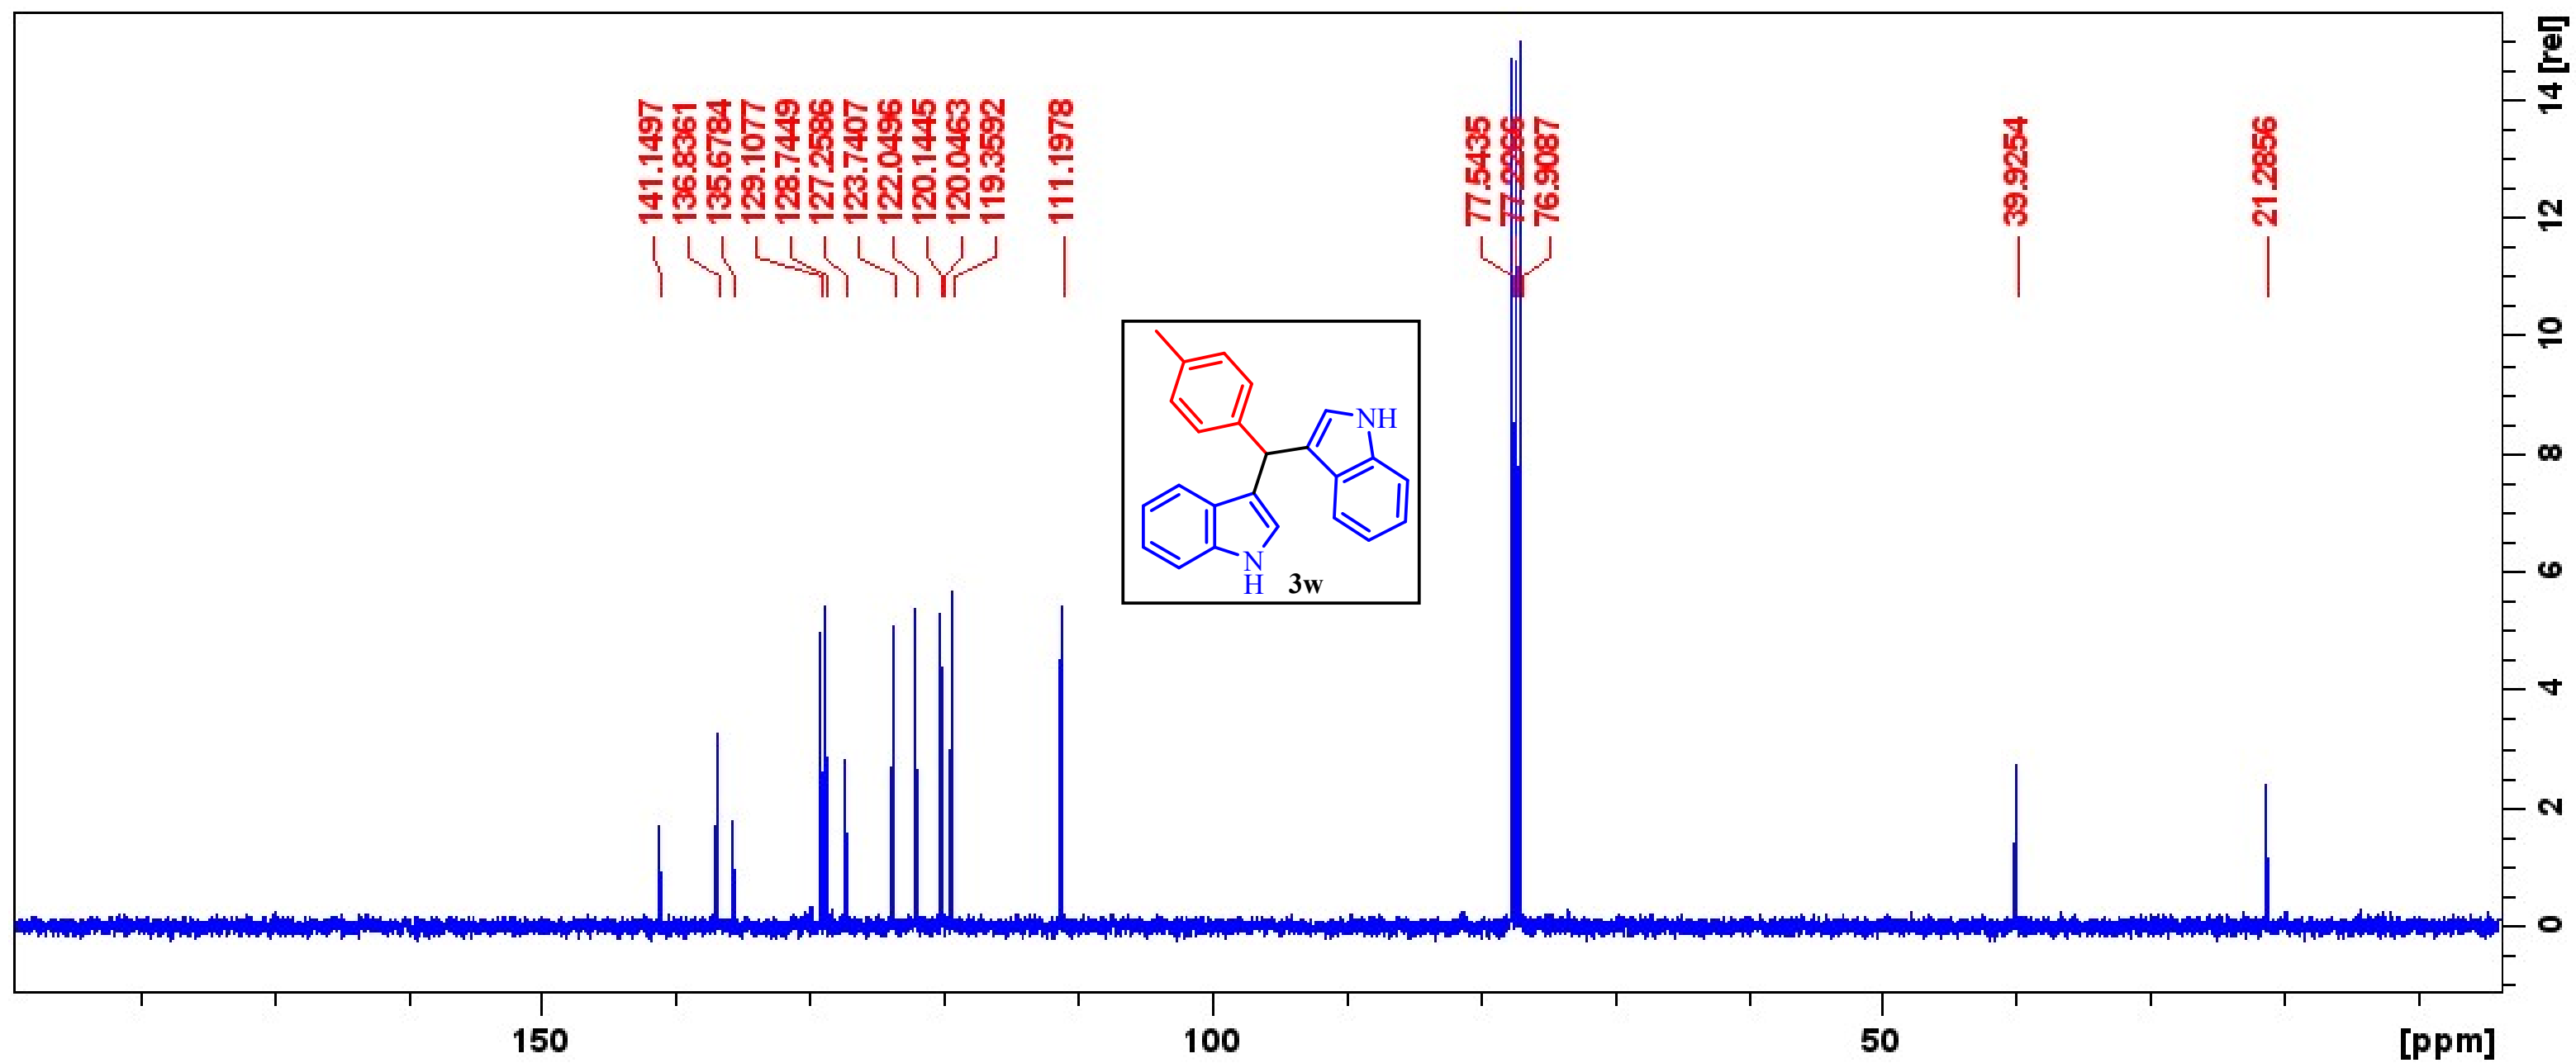

Figure 63. <sup>13</sup>C NMR spectrum of compound 3w

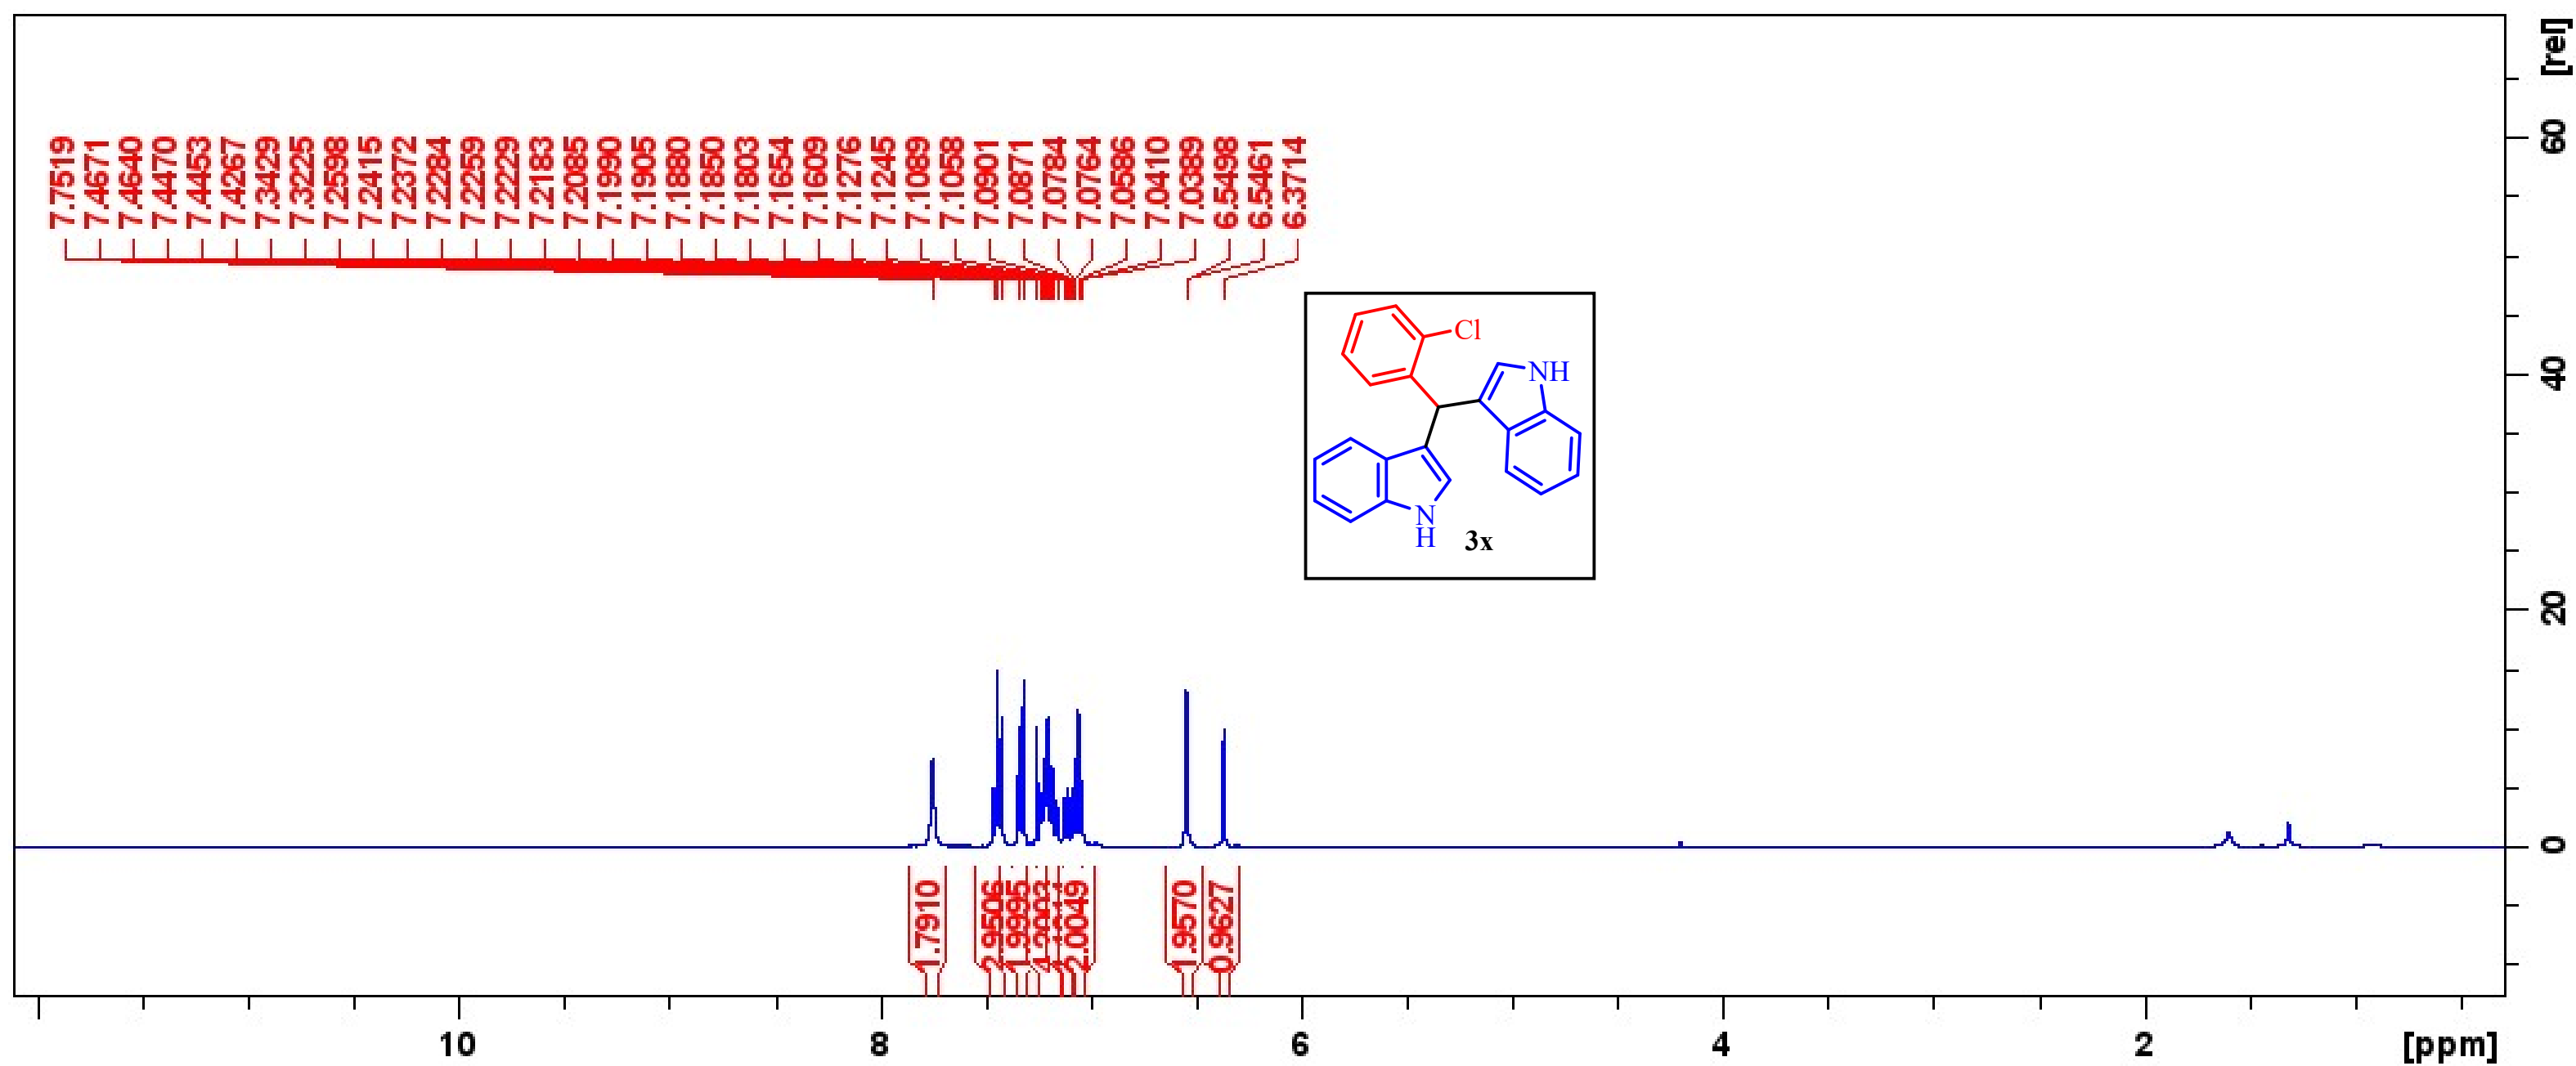

Figure 64.  $^1\text{H}$  NMR spectrum of compound **3x**

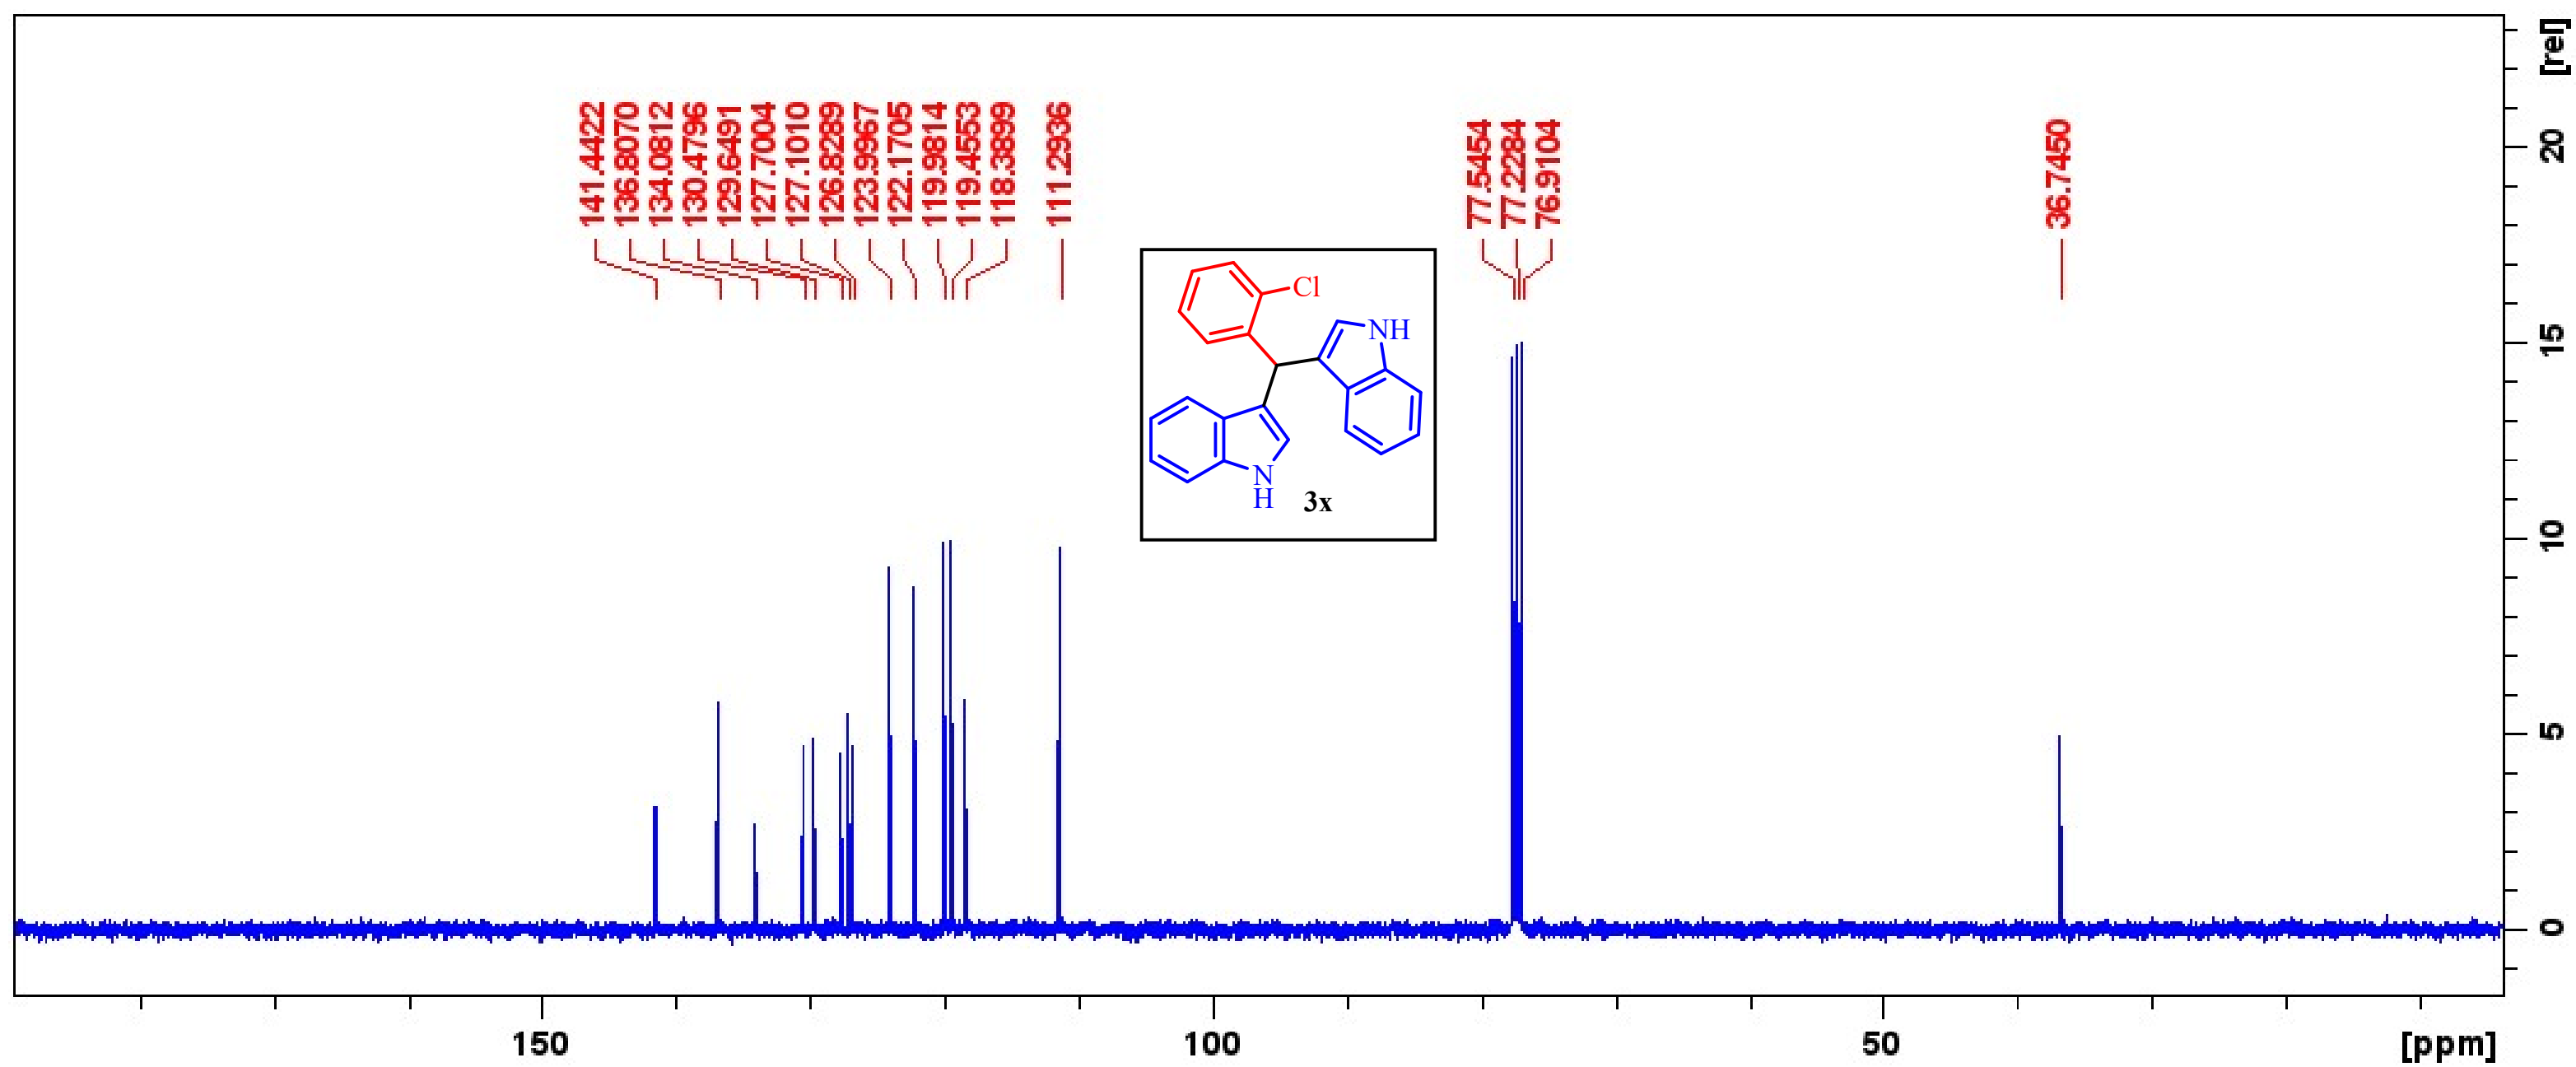

Figure 65.  $^{13}\text{C}$  NMR spectrum of compound **3x**

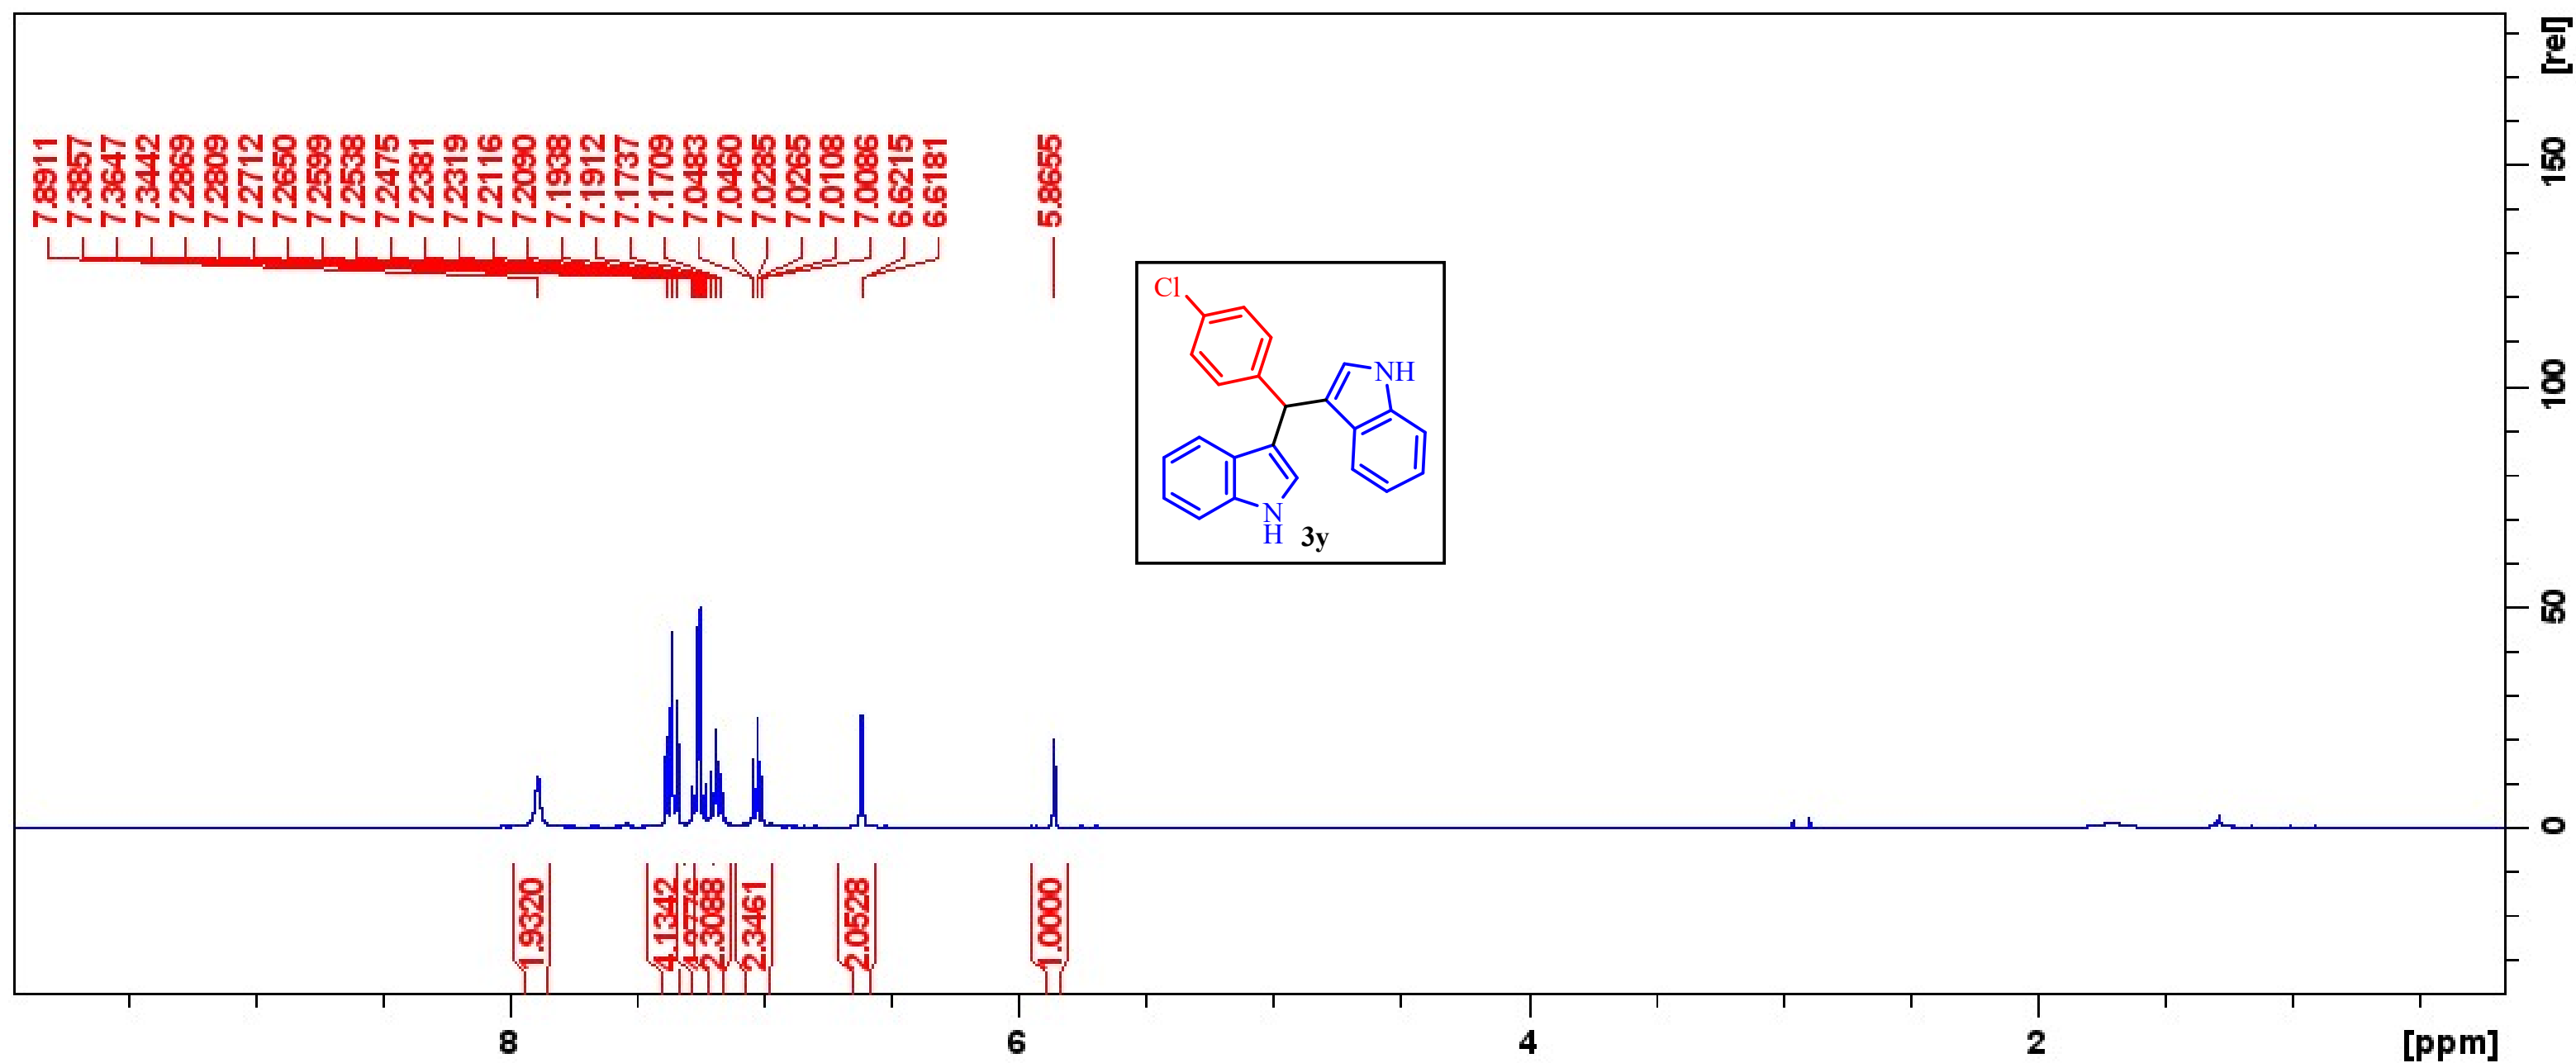

Figure 66.  $^1\text{H}$  NMR spectrum of compound **3y**

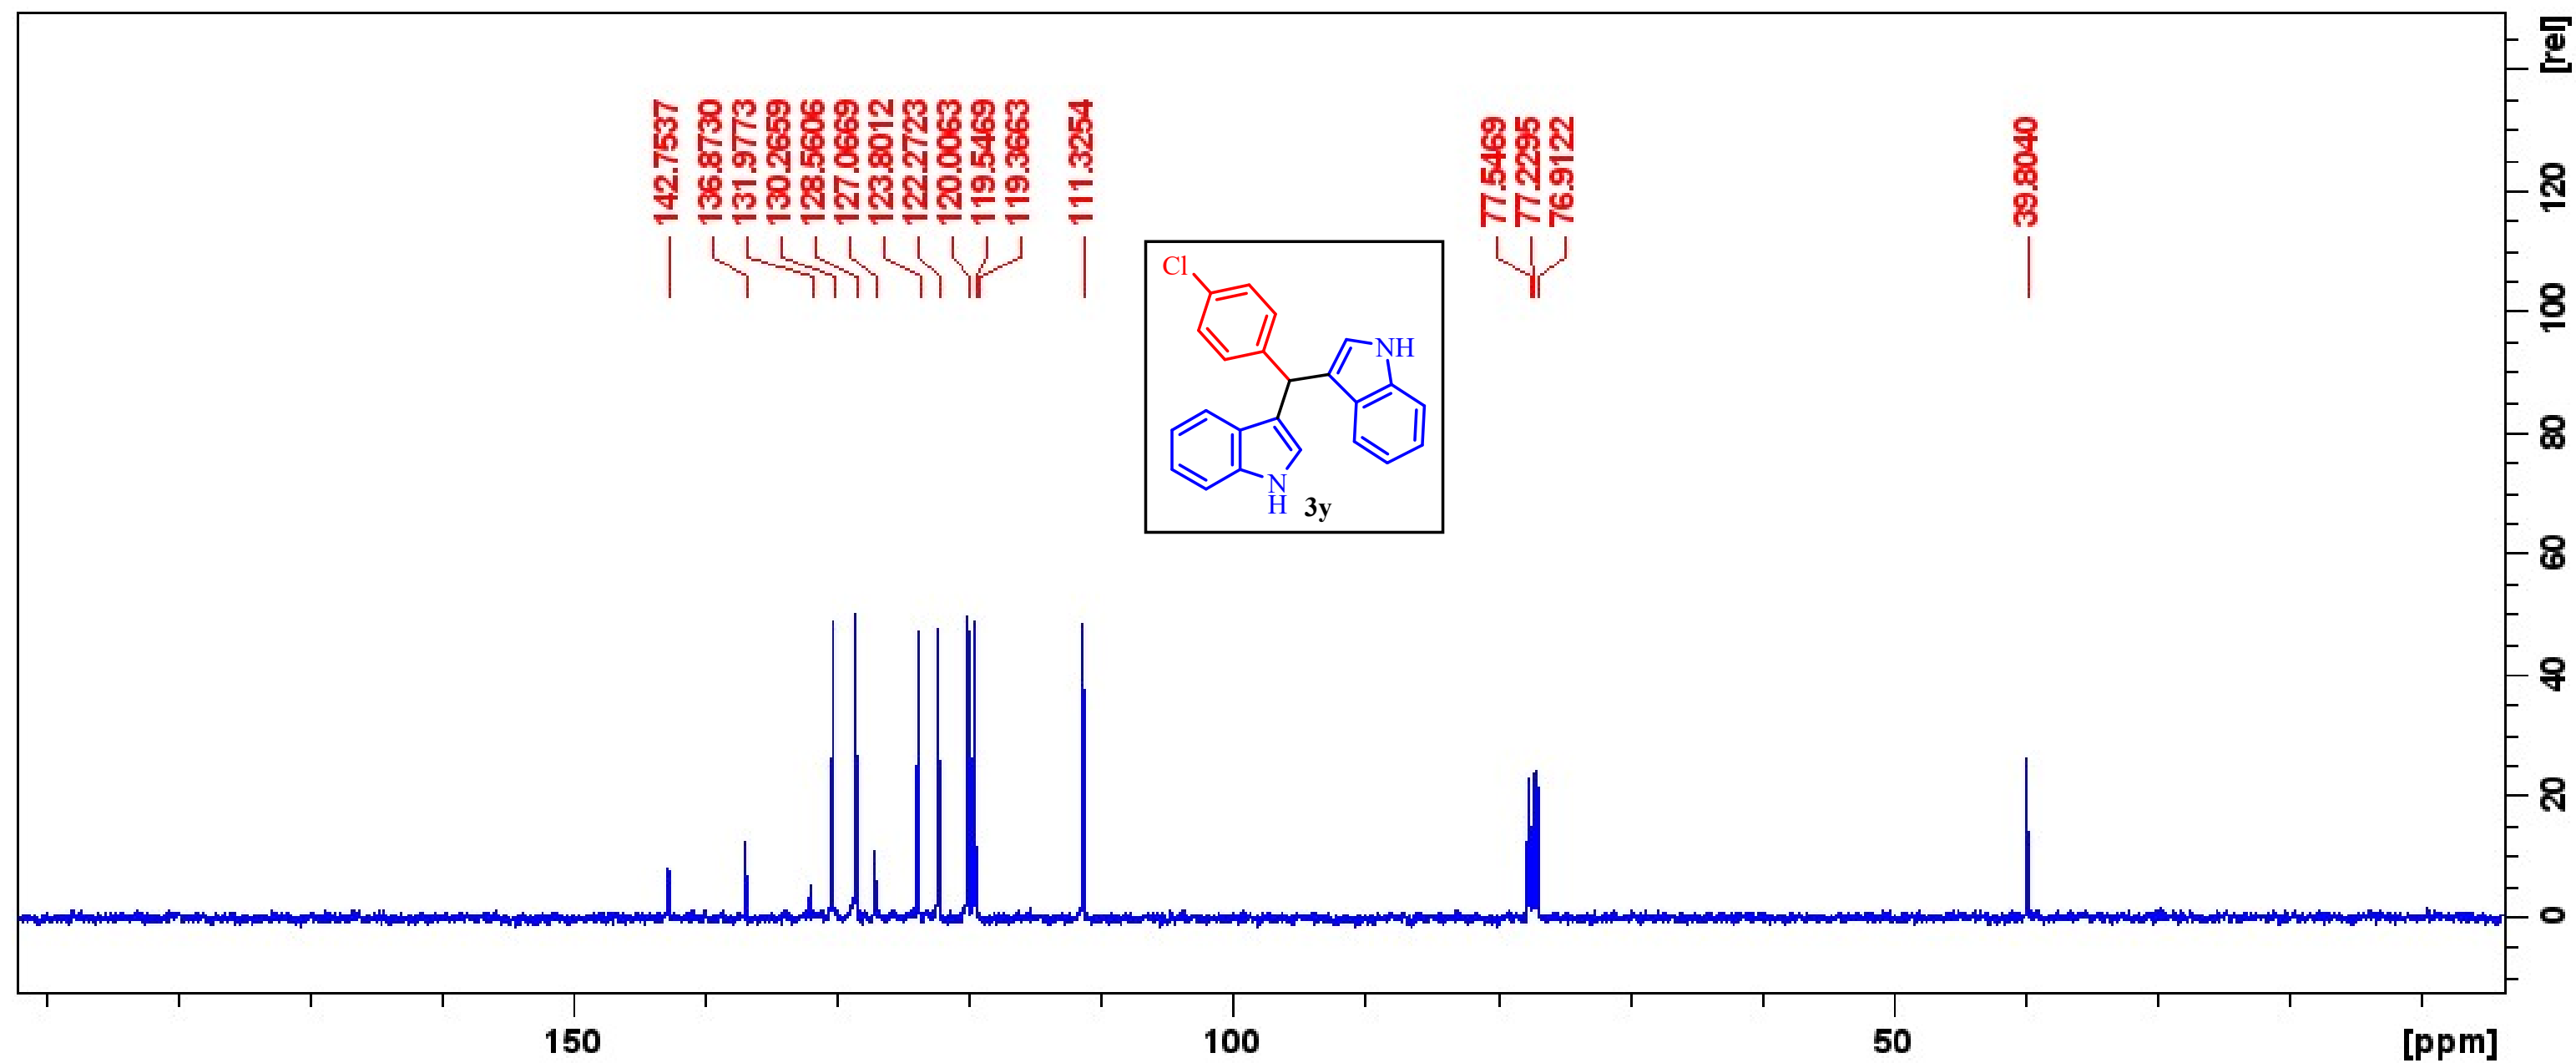

Figure 67. <sup>13</sup>C NMR spectrum of compound 3y

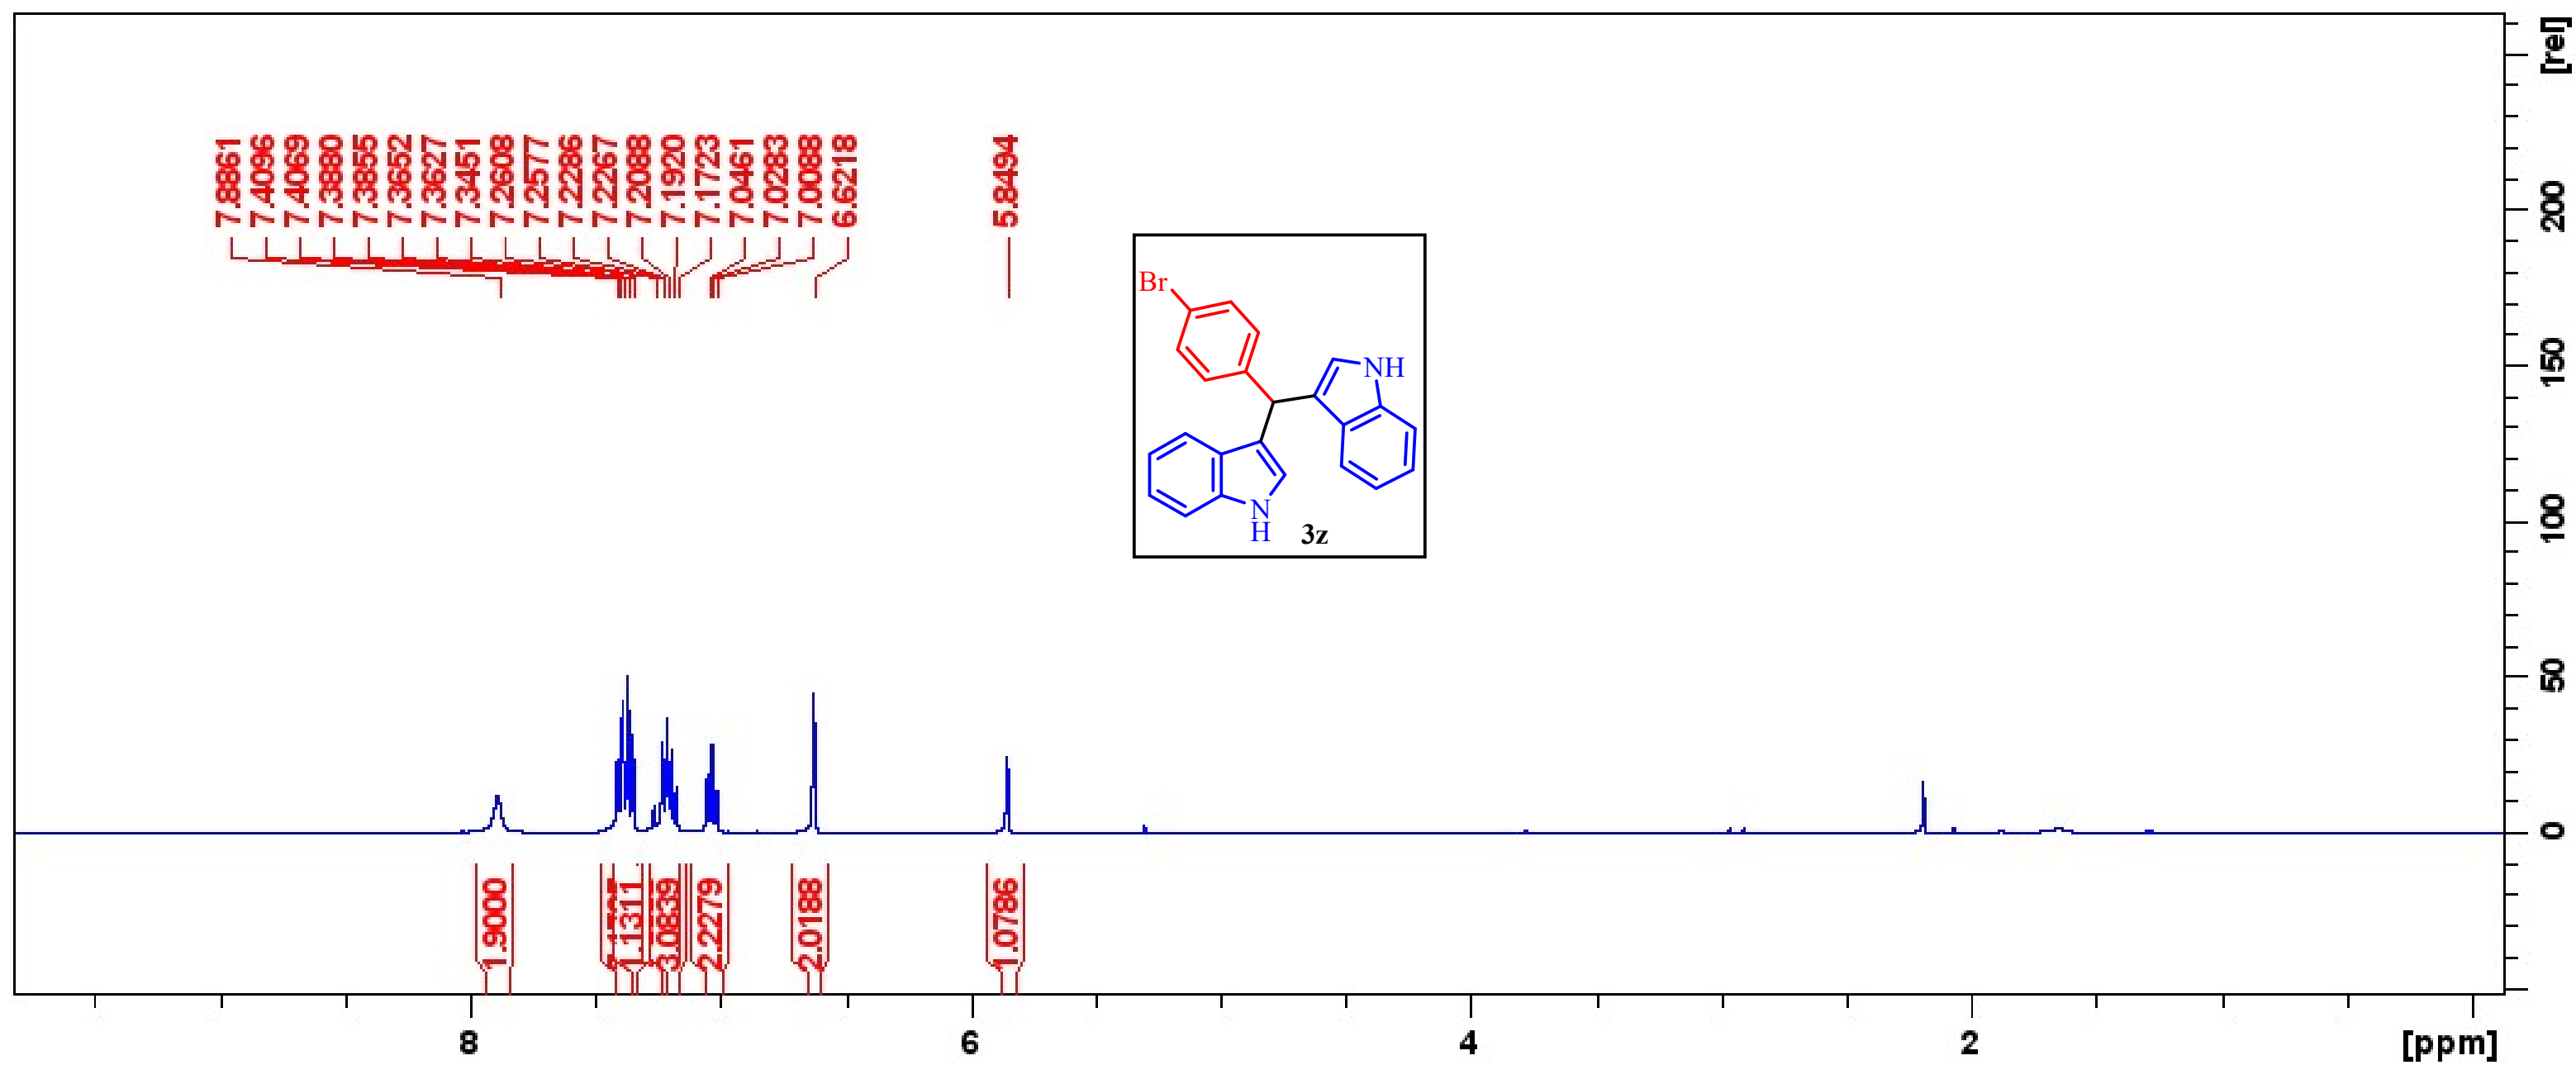

Figure 68. <sup>1</sup>H NMR spectrum of compound **3z**

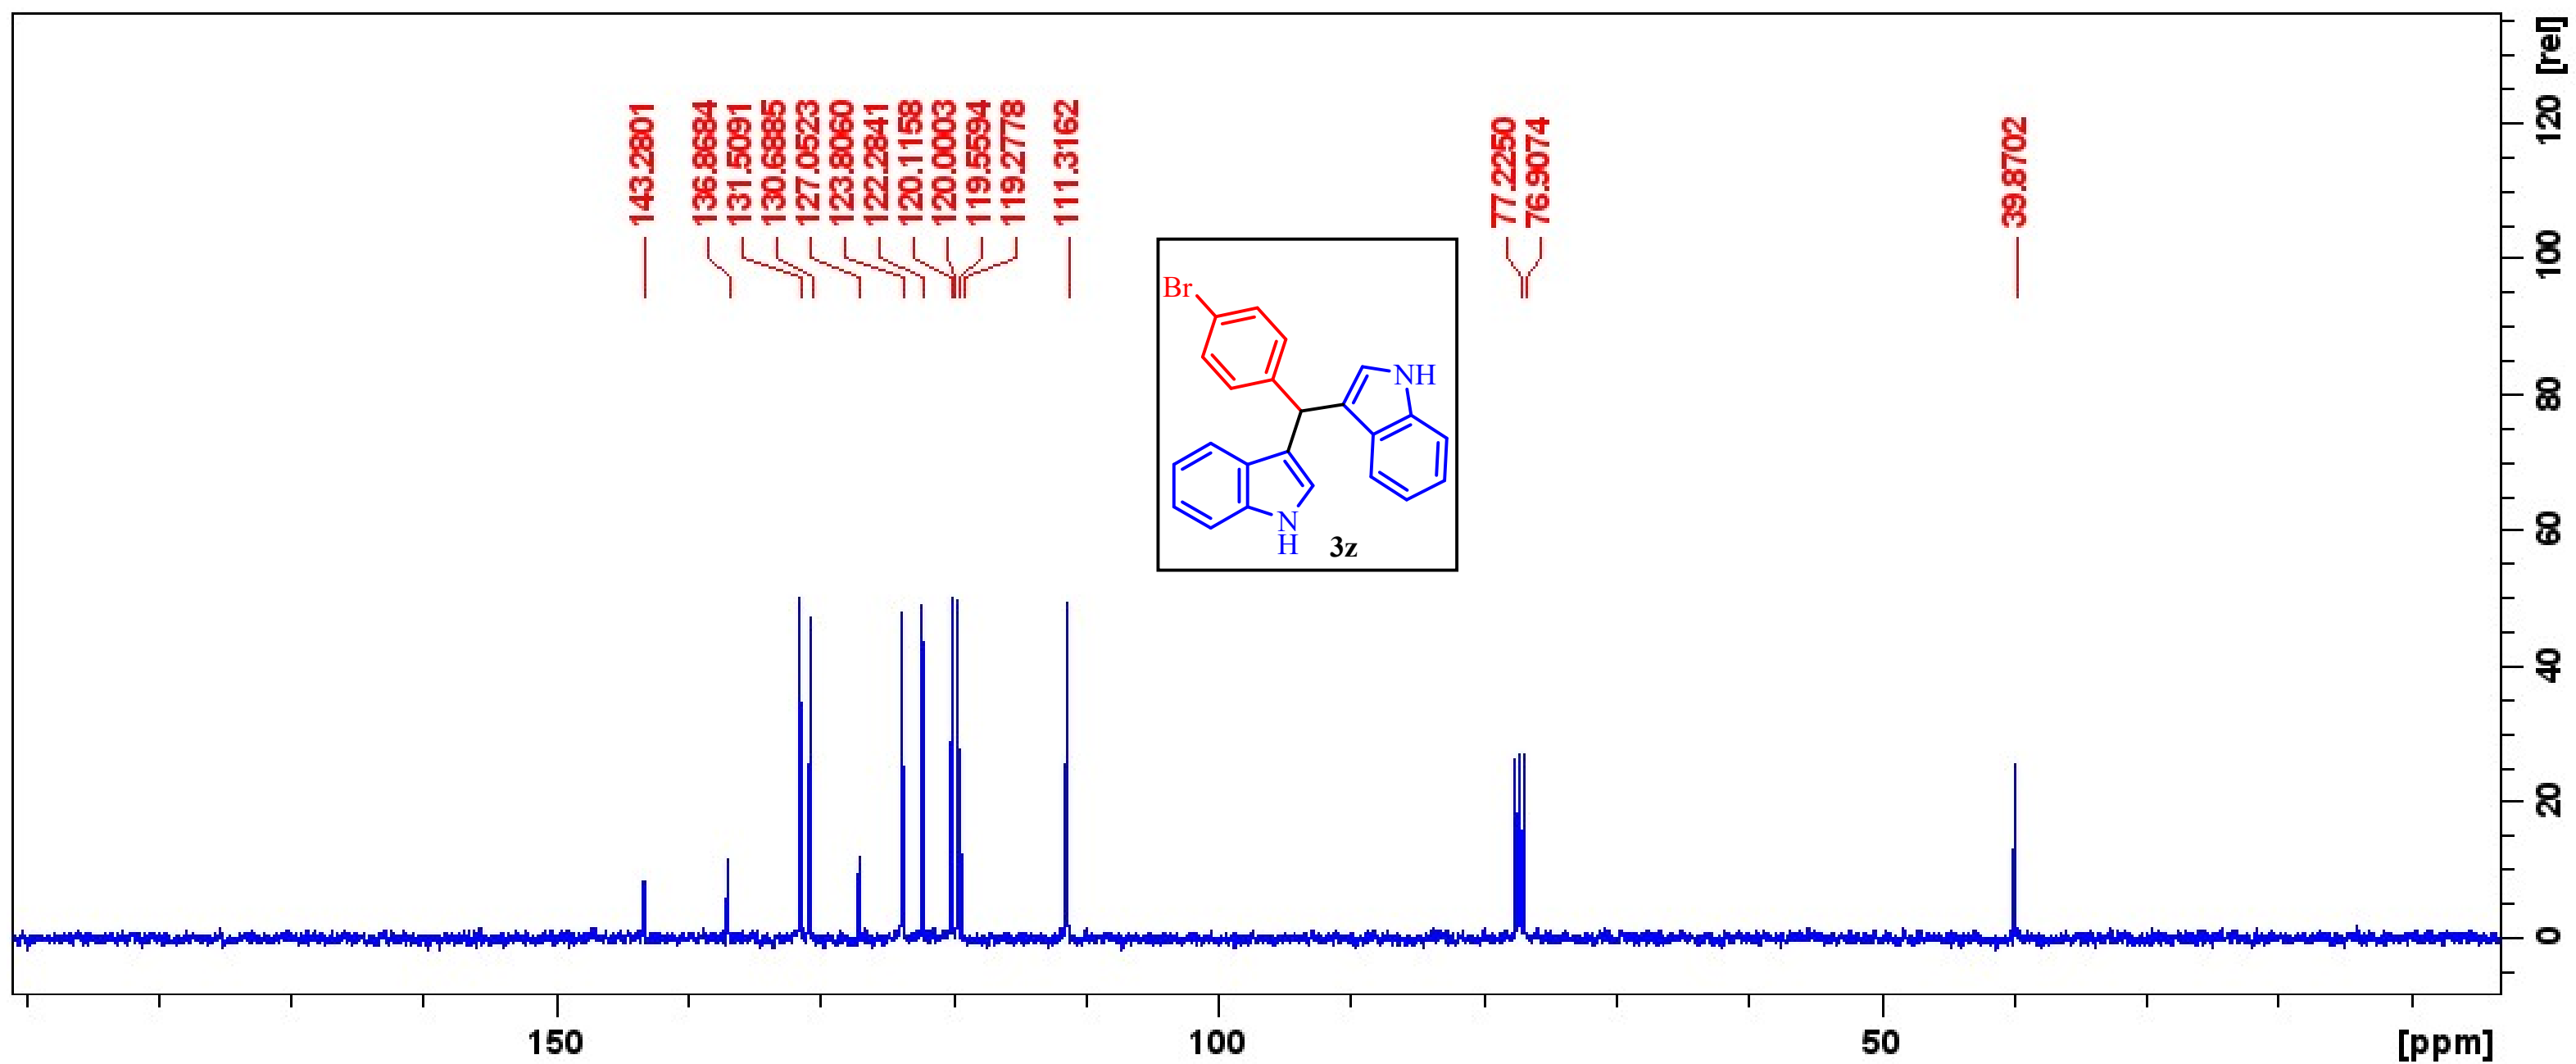

Figure 69. <sup>13</sup>C NMR spectrum of compound **3z**
